# Supplementary material for: A Tale of Genome Compartmentalization: The Evolution of Virulence Clusters in Smut Fungi
Source: Oxford University Press journal article supplement (doi:10.1093/gbe/evw026), 2016-02-12
Supplement: evw026_Supplementary_Data.zip [file evw026_Supplementary_Data.zip]

Archive with 12 entries (12 files):
- TableS3.xlsx
- TableS4.xlsx
- TableS2.xlsx
- FigureS4.pdf
- TableS5.xlsx
- TableS1.xlsx
- FigureS7.pdf
- FigureS1.pdf
- FigureS2.tif
- FigureS3.pdf
- FigureS6.pdf
- FigureS5.pdf
