# Supplementary material for: A Tale of Genome Compartmentalization: The Evolution of Virulence Clusters in Smut Fungi
Source: Oxford University Press journal article supplement (doi:10.1093/gbe/evw026), 2016-02-12
Supplement: evw026_Supplementary_Data.zip [file evw026_Supplementary_Data.zip › FigureS4.pdf]

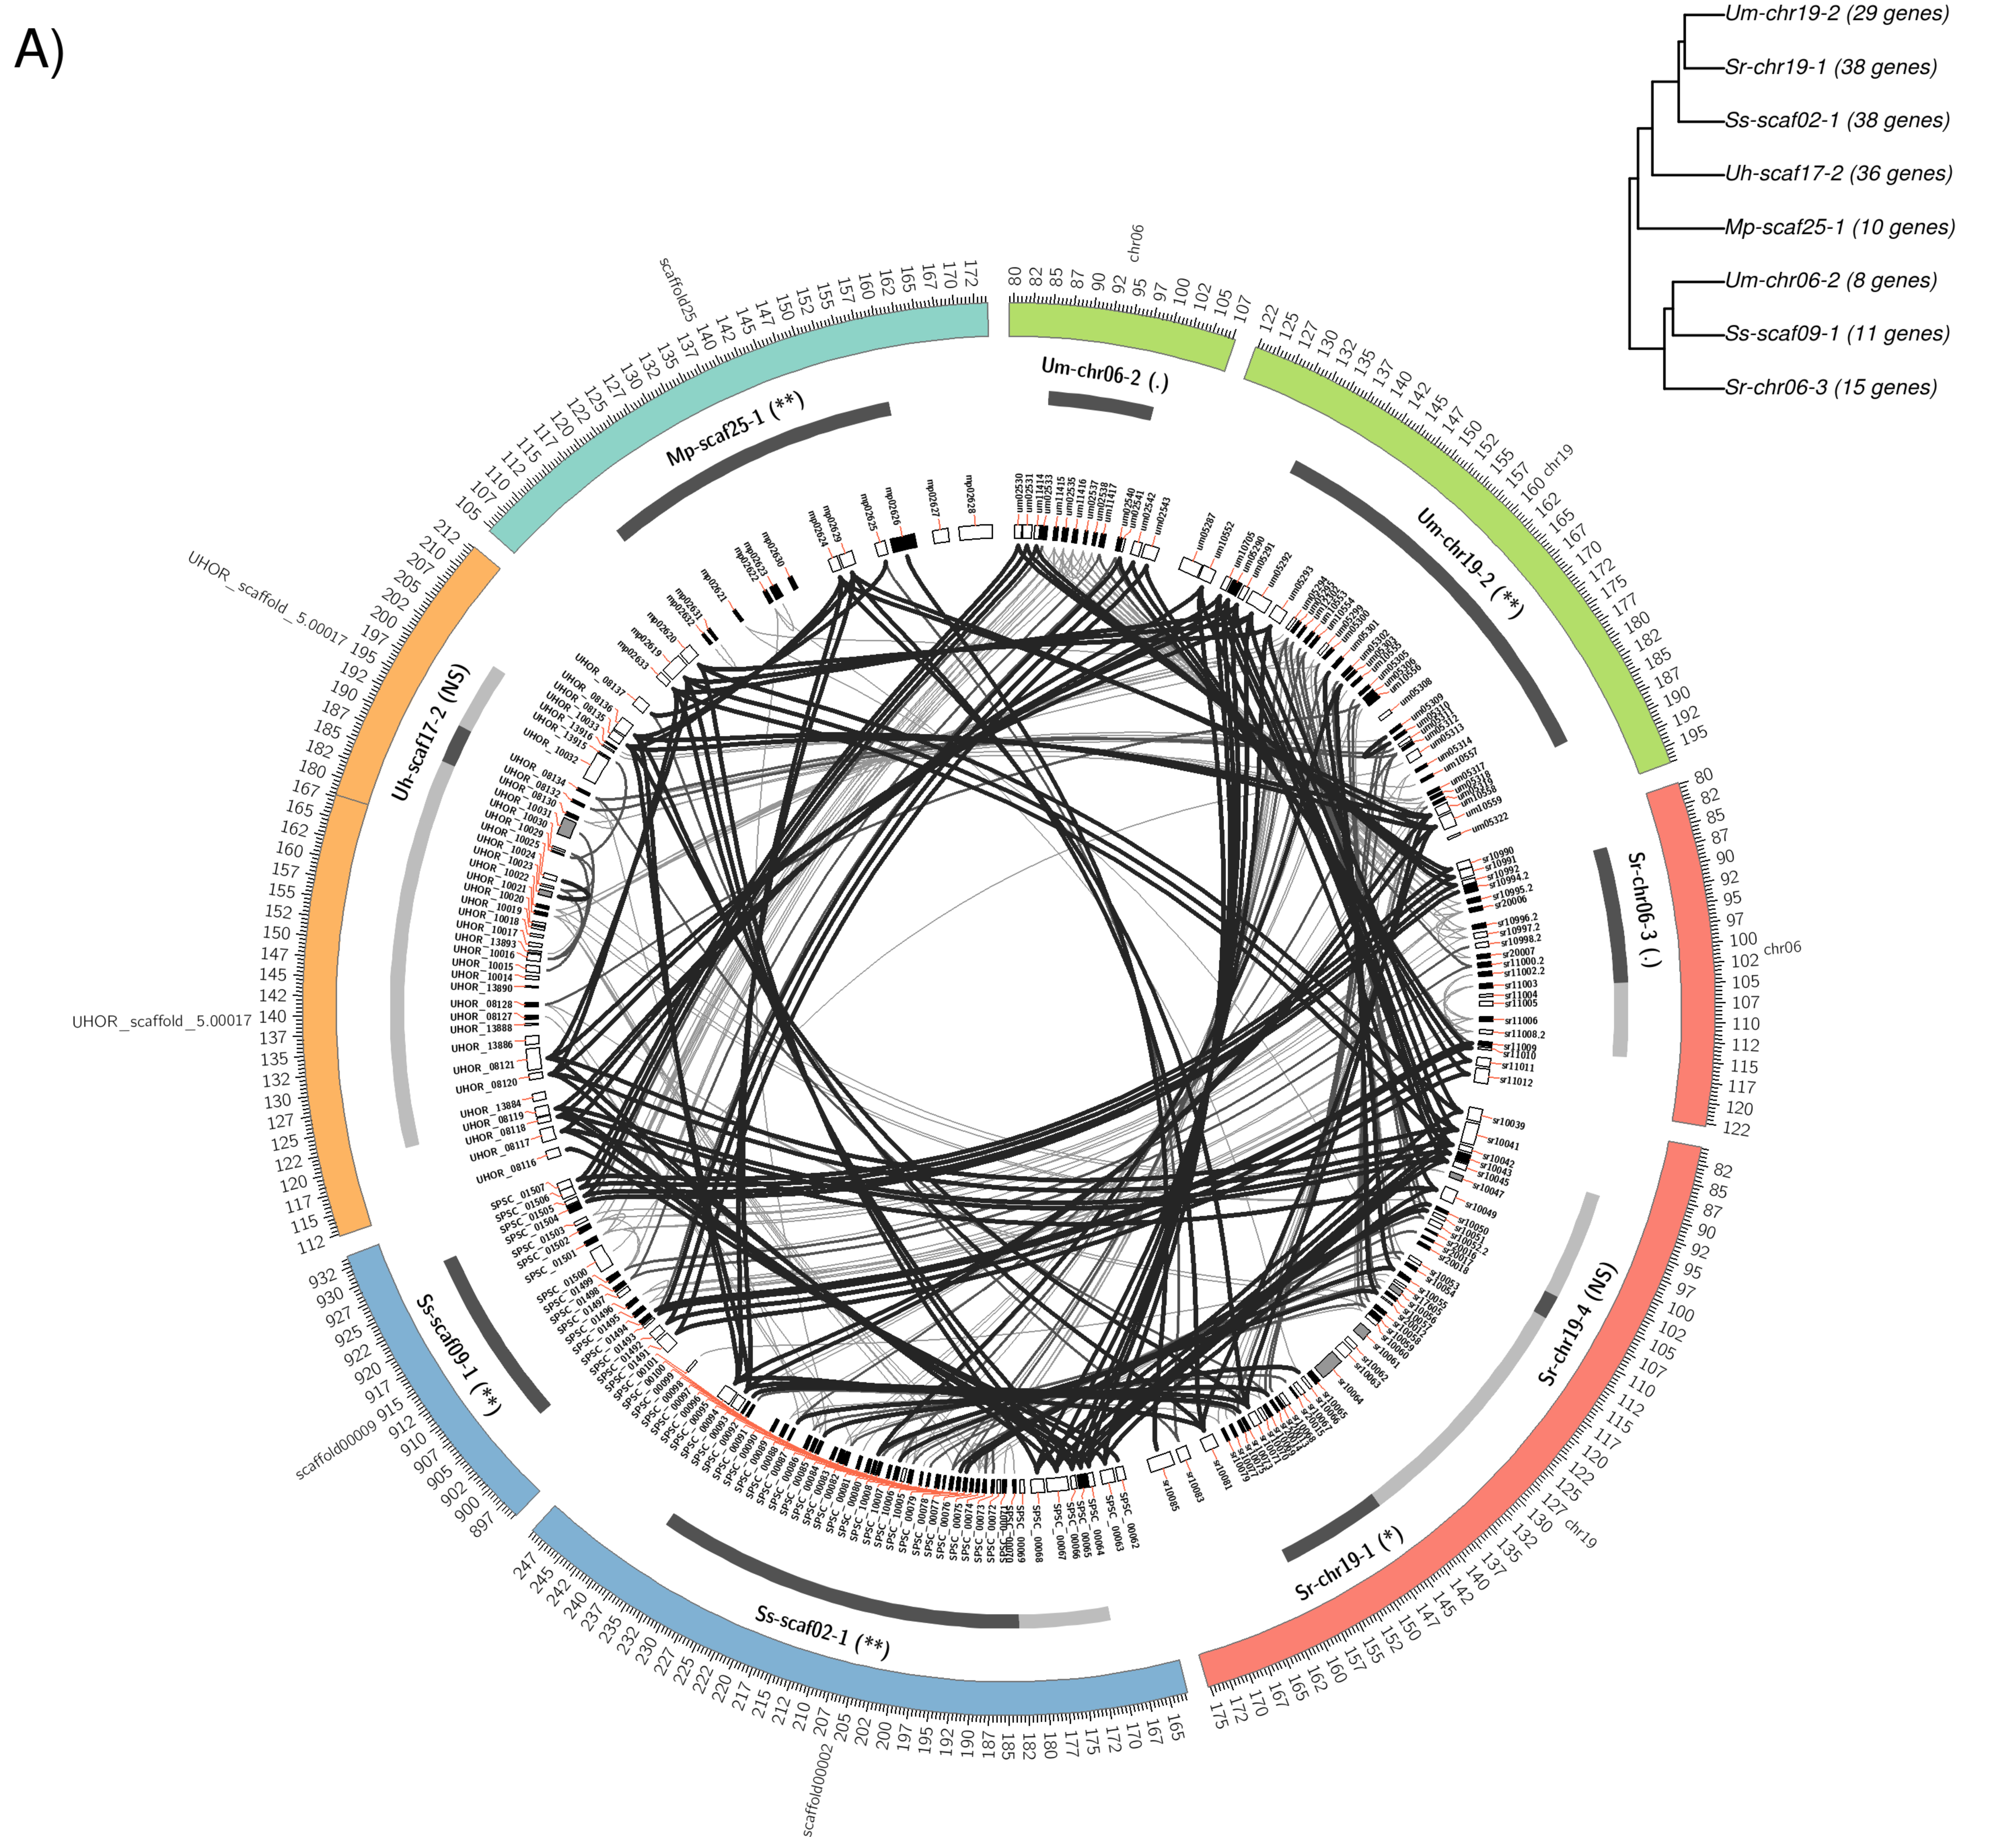

**B)**

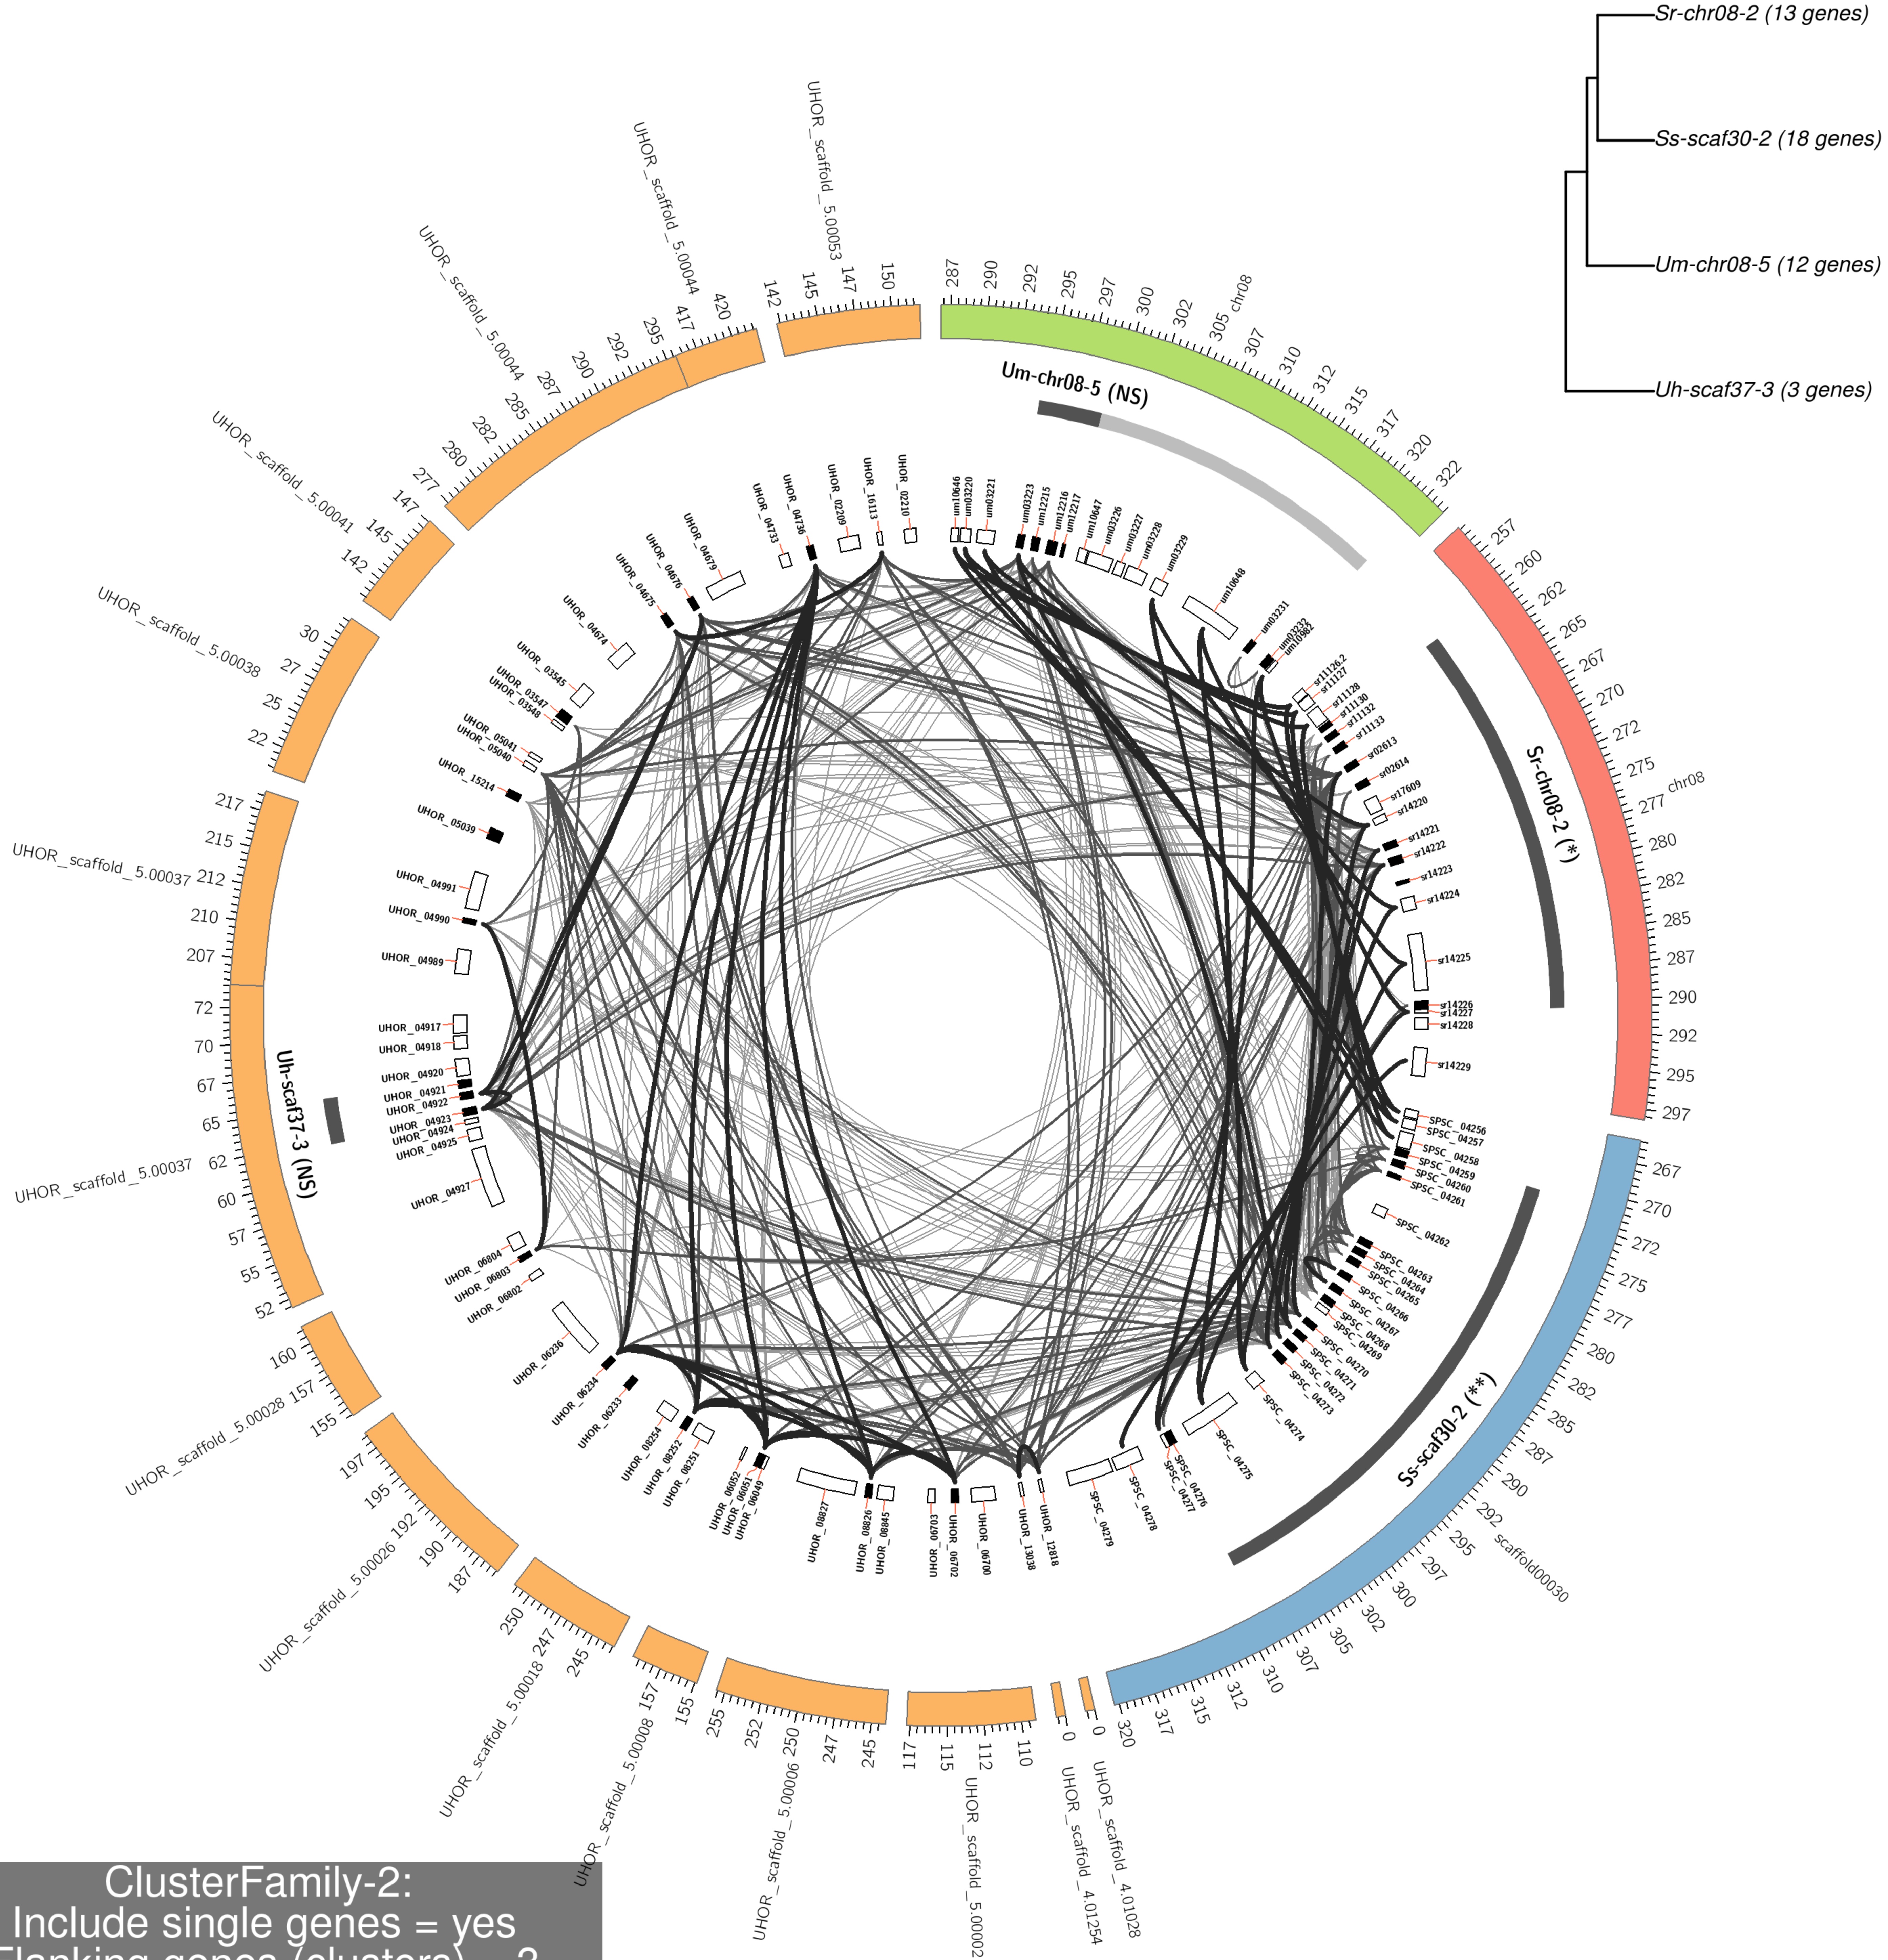

ClusterFamily-2:  
 Include single genes = yes  
 Flanking genes (clusters) = 3  
 Flanking genes (single genes) = 1

C)

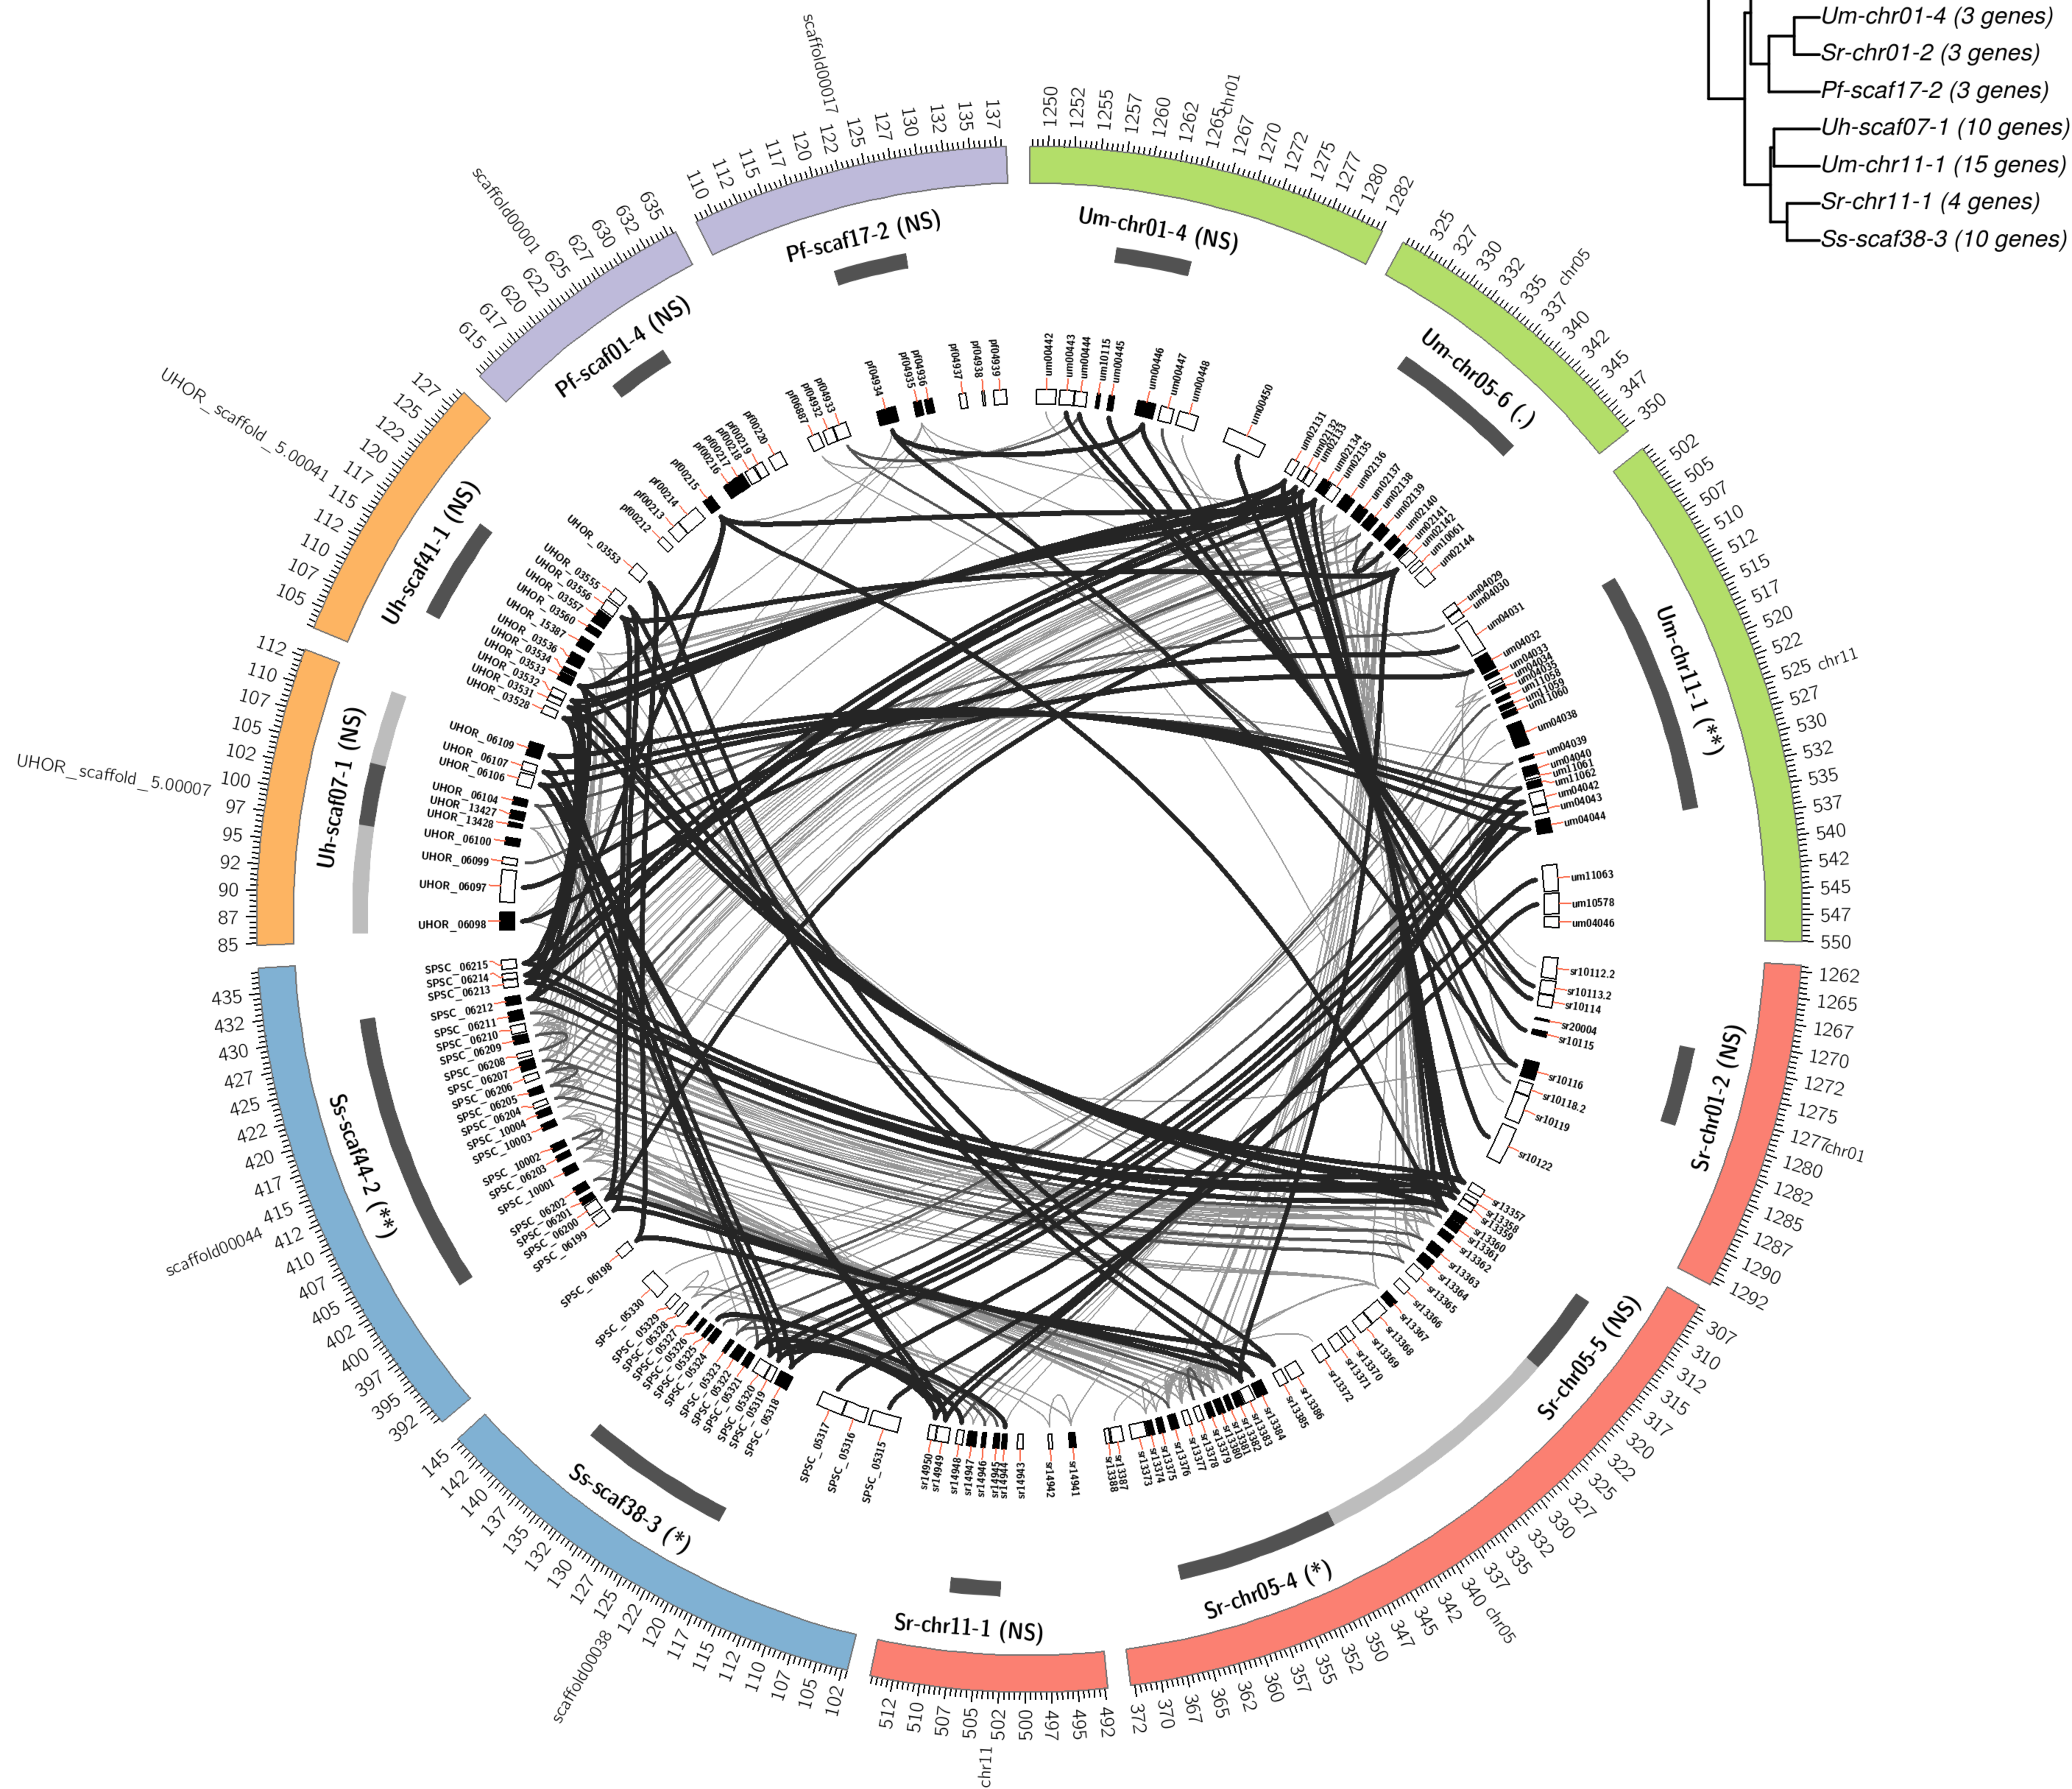

## ClusterFamily-3:

Include single genes = no  
Flanking genes (clusters) = 3  
Flanking genes (single genes) = NA

D)

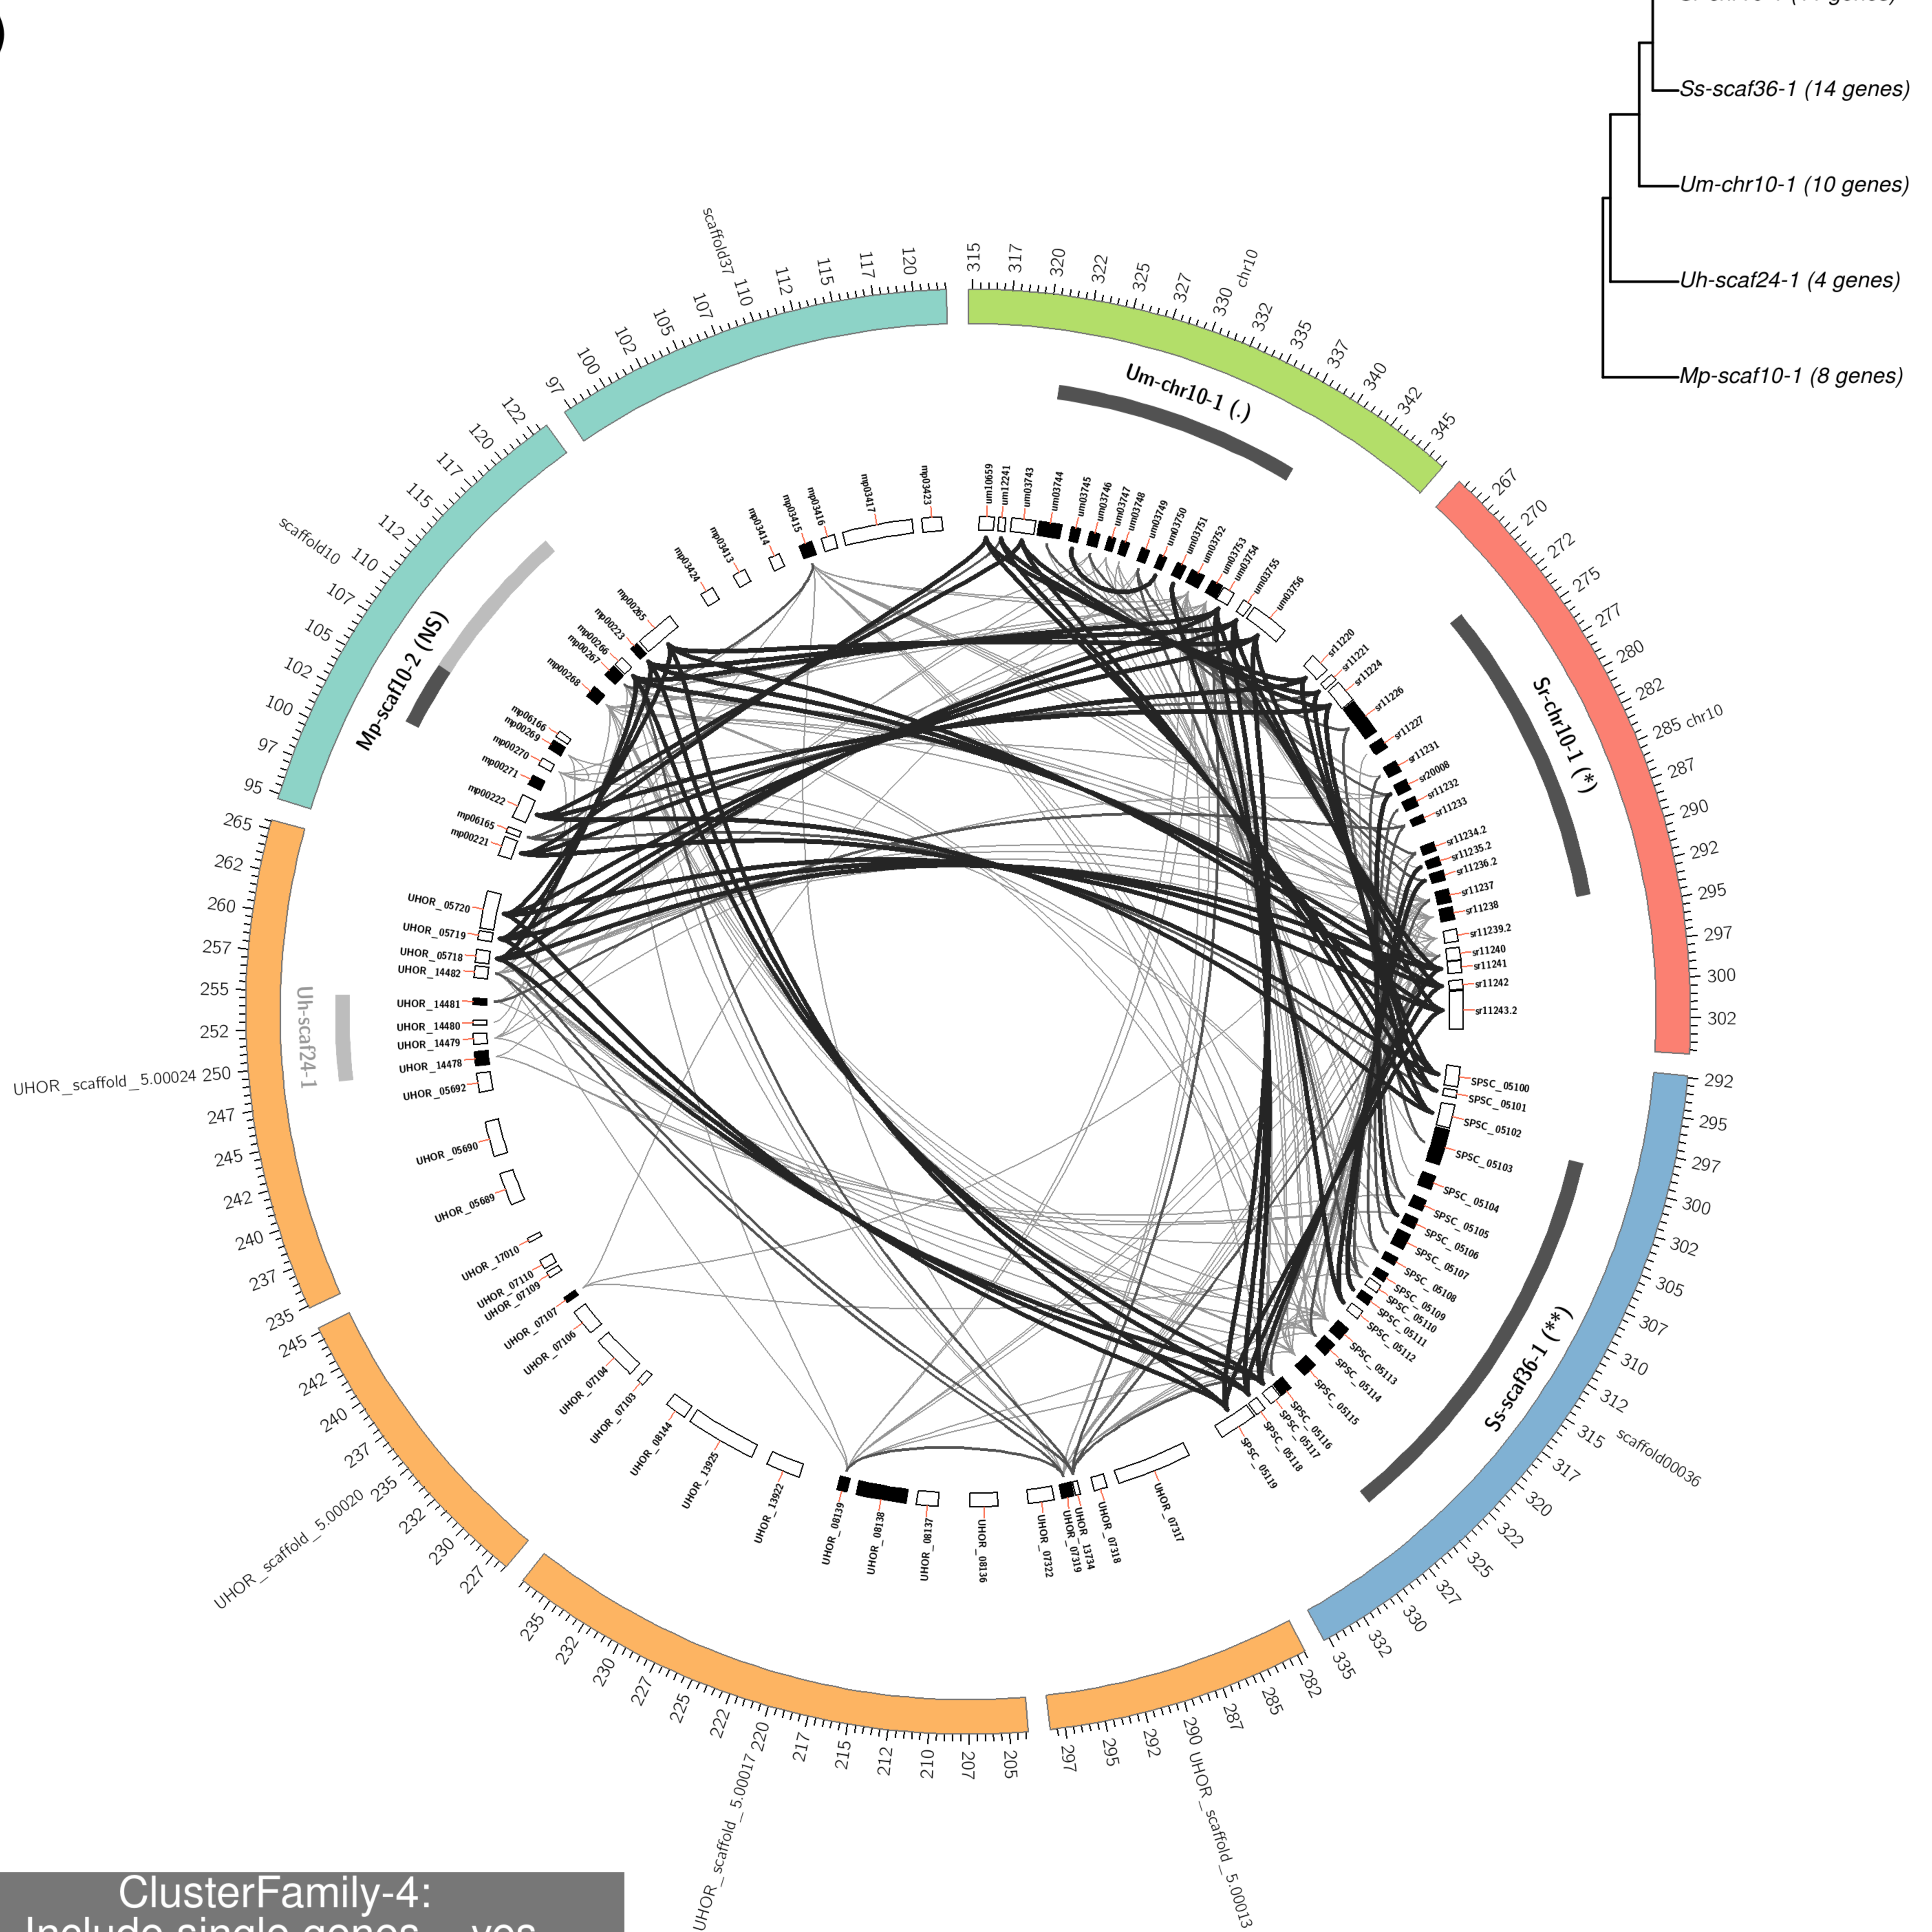

Phylogenetic tree showing the relationship between four scaffolds:

- Ss-scaf36-1* (14 genes)
- Um-chr10-1* (10 genes)
- Uh-scaf24-1* (4 genes)
- Mp-scaf10-1* (8 genes)

ClusterFamily-4:  
 Include single genes = yes  
 Flanking genes (clusters) = 3  
 Flanking genes (single genes) = 3

E)

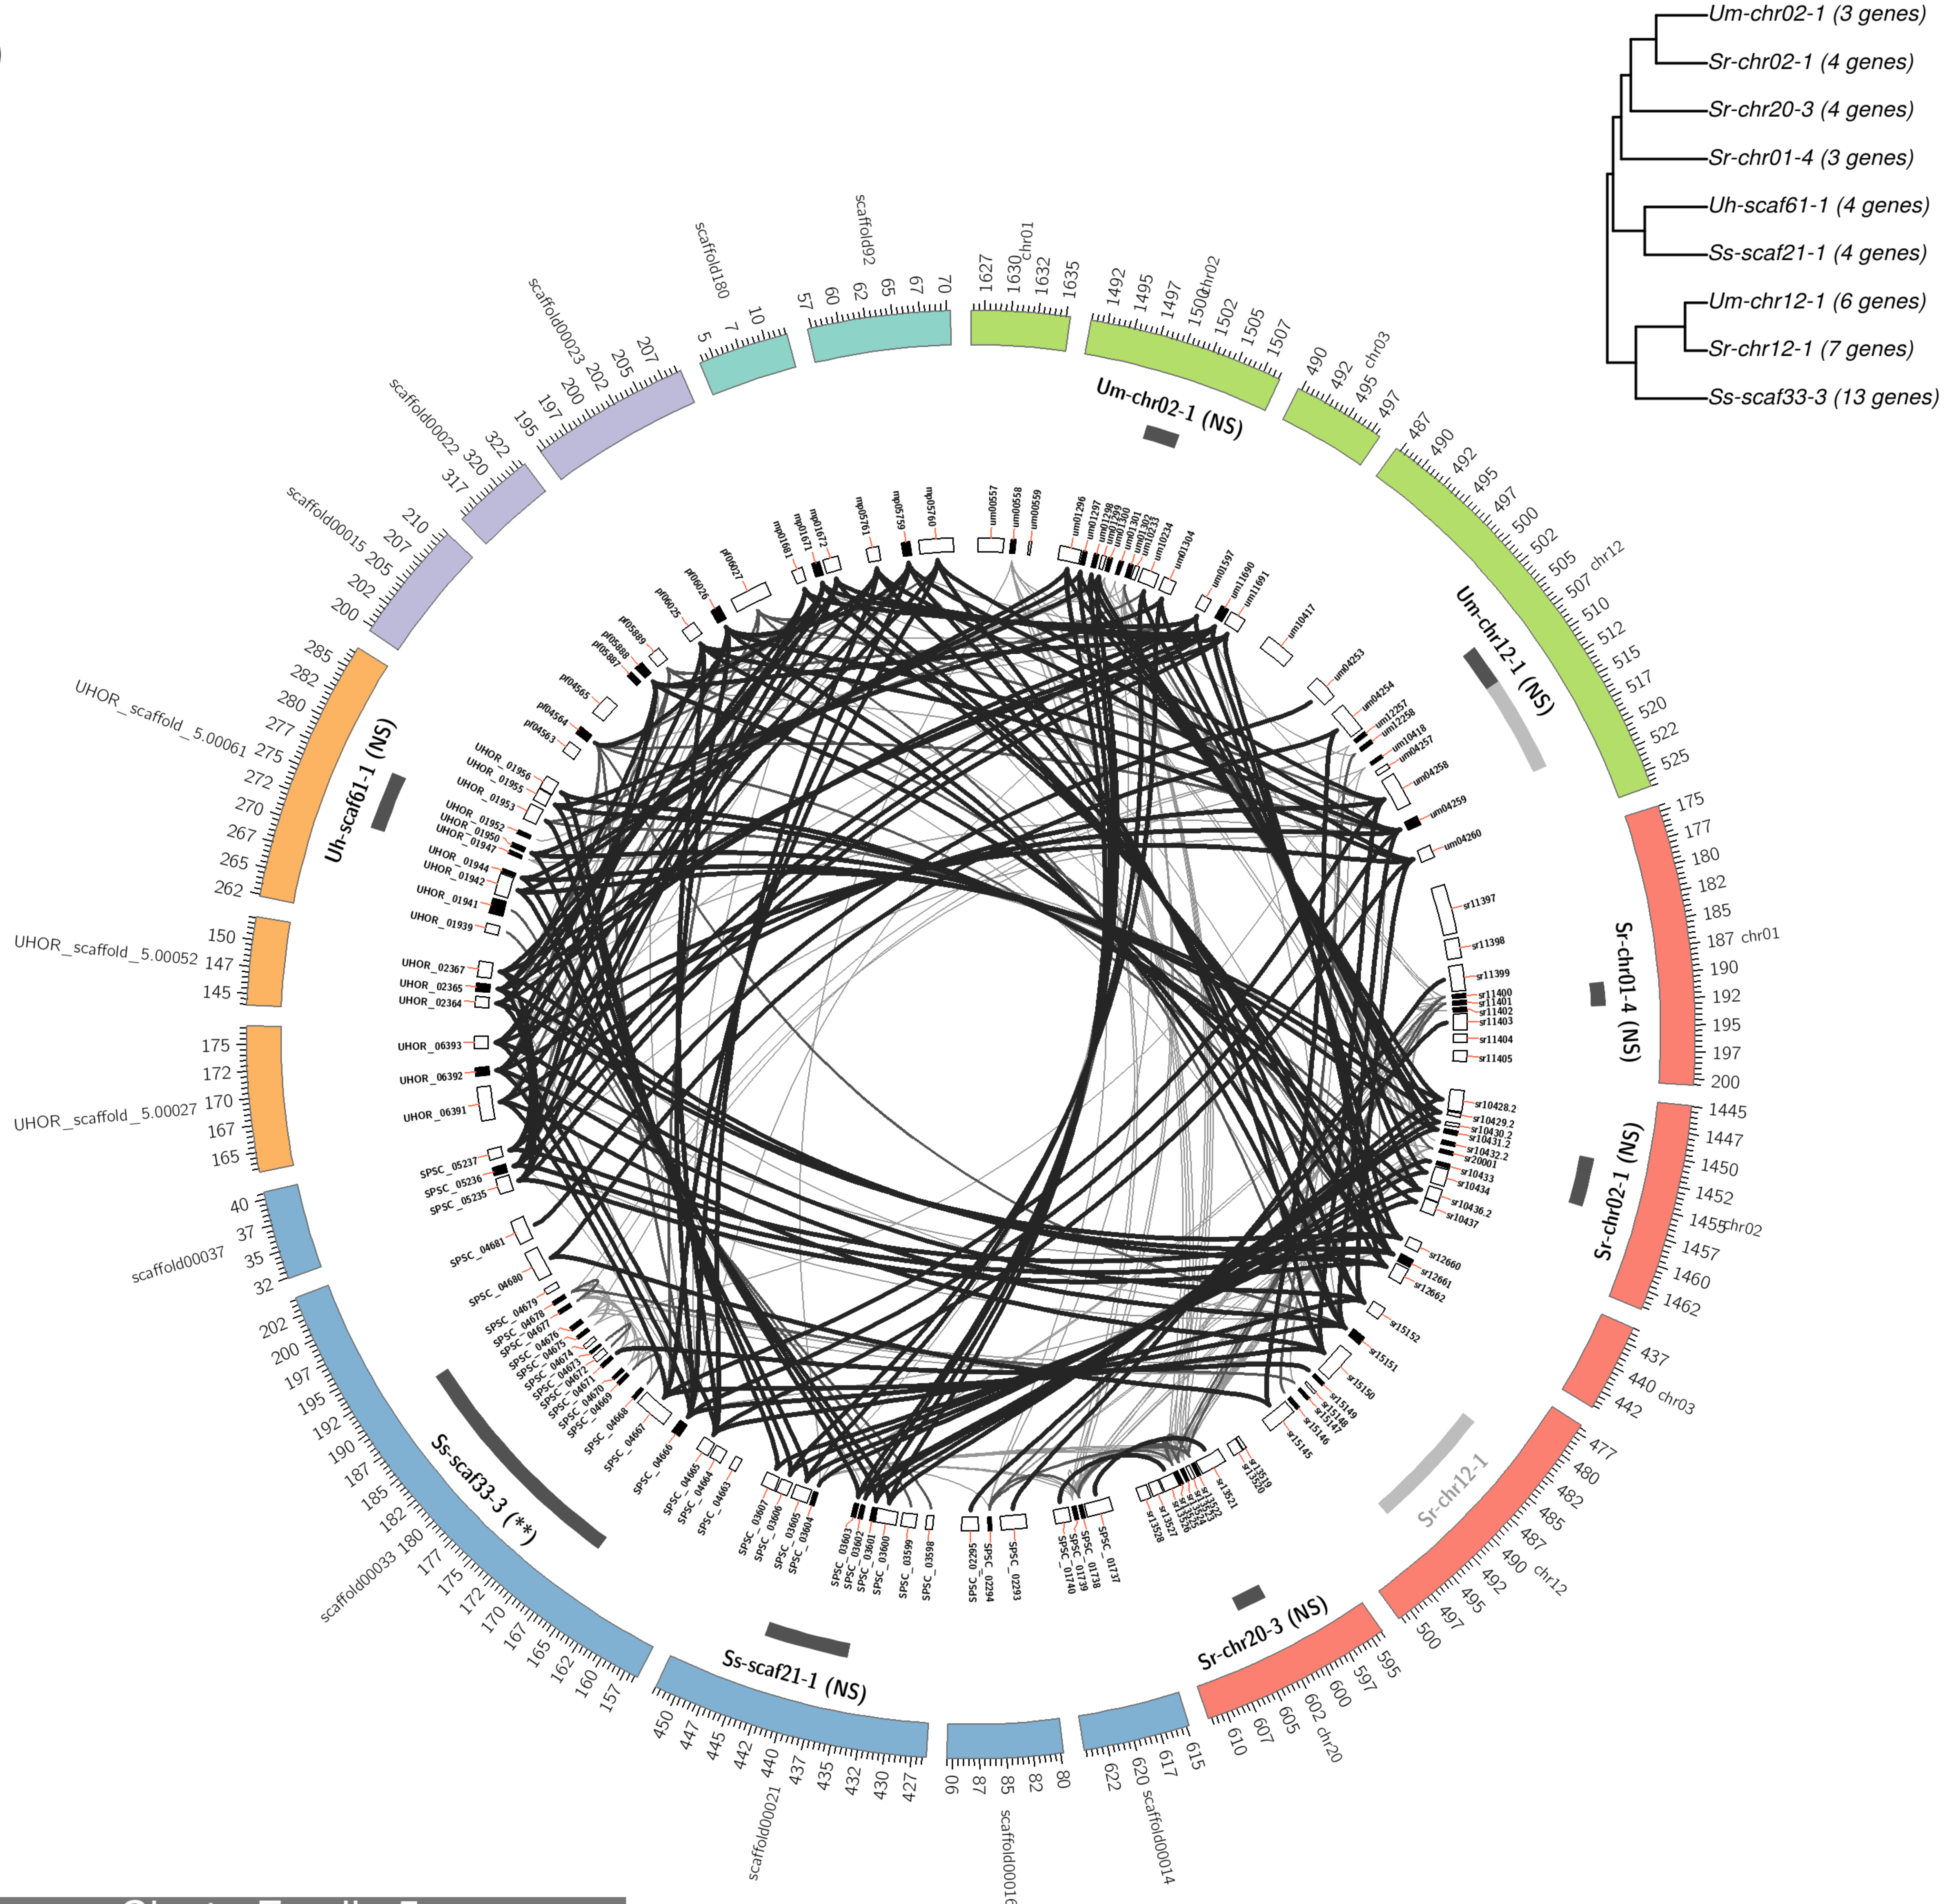

## ClusterFamily-5:

Include single genes = yes

Flanking genes (clusters) = 3

Flanking genes (single genes) = 1

F)

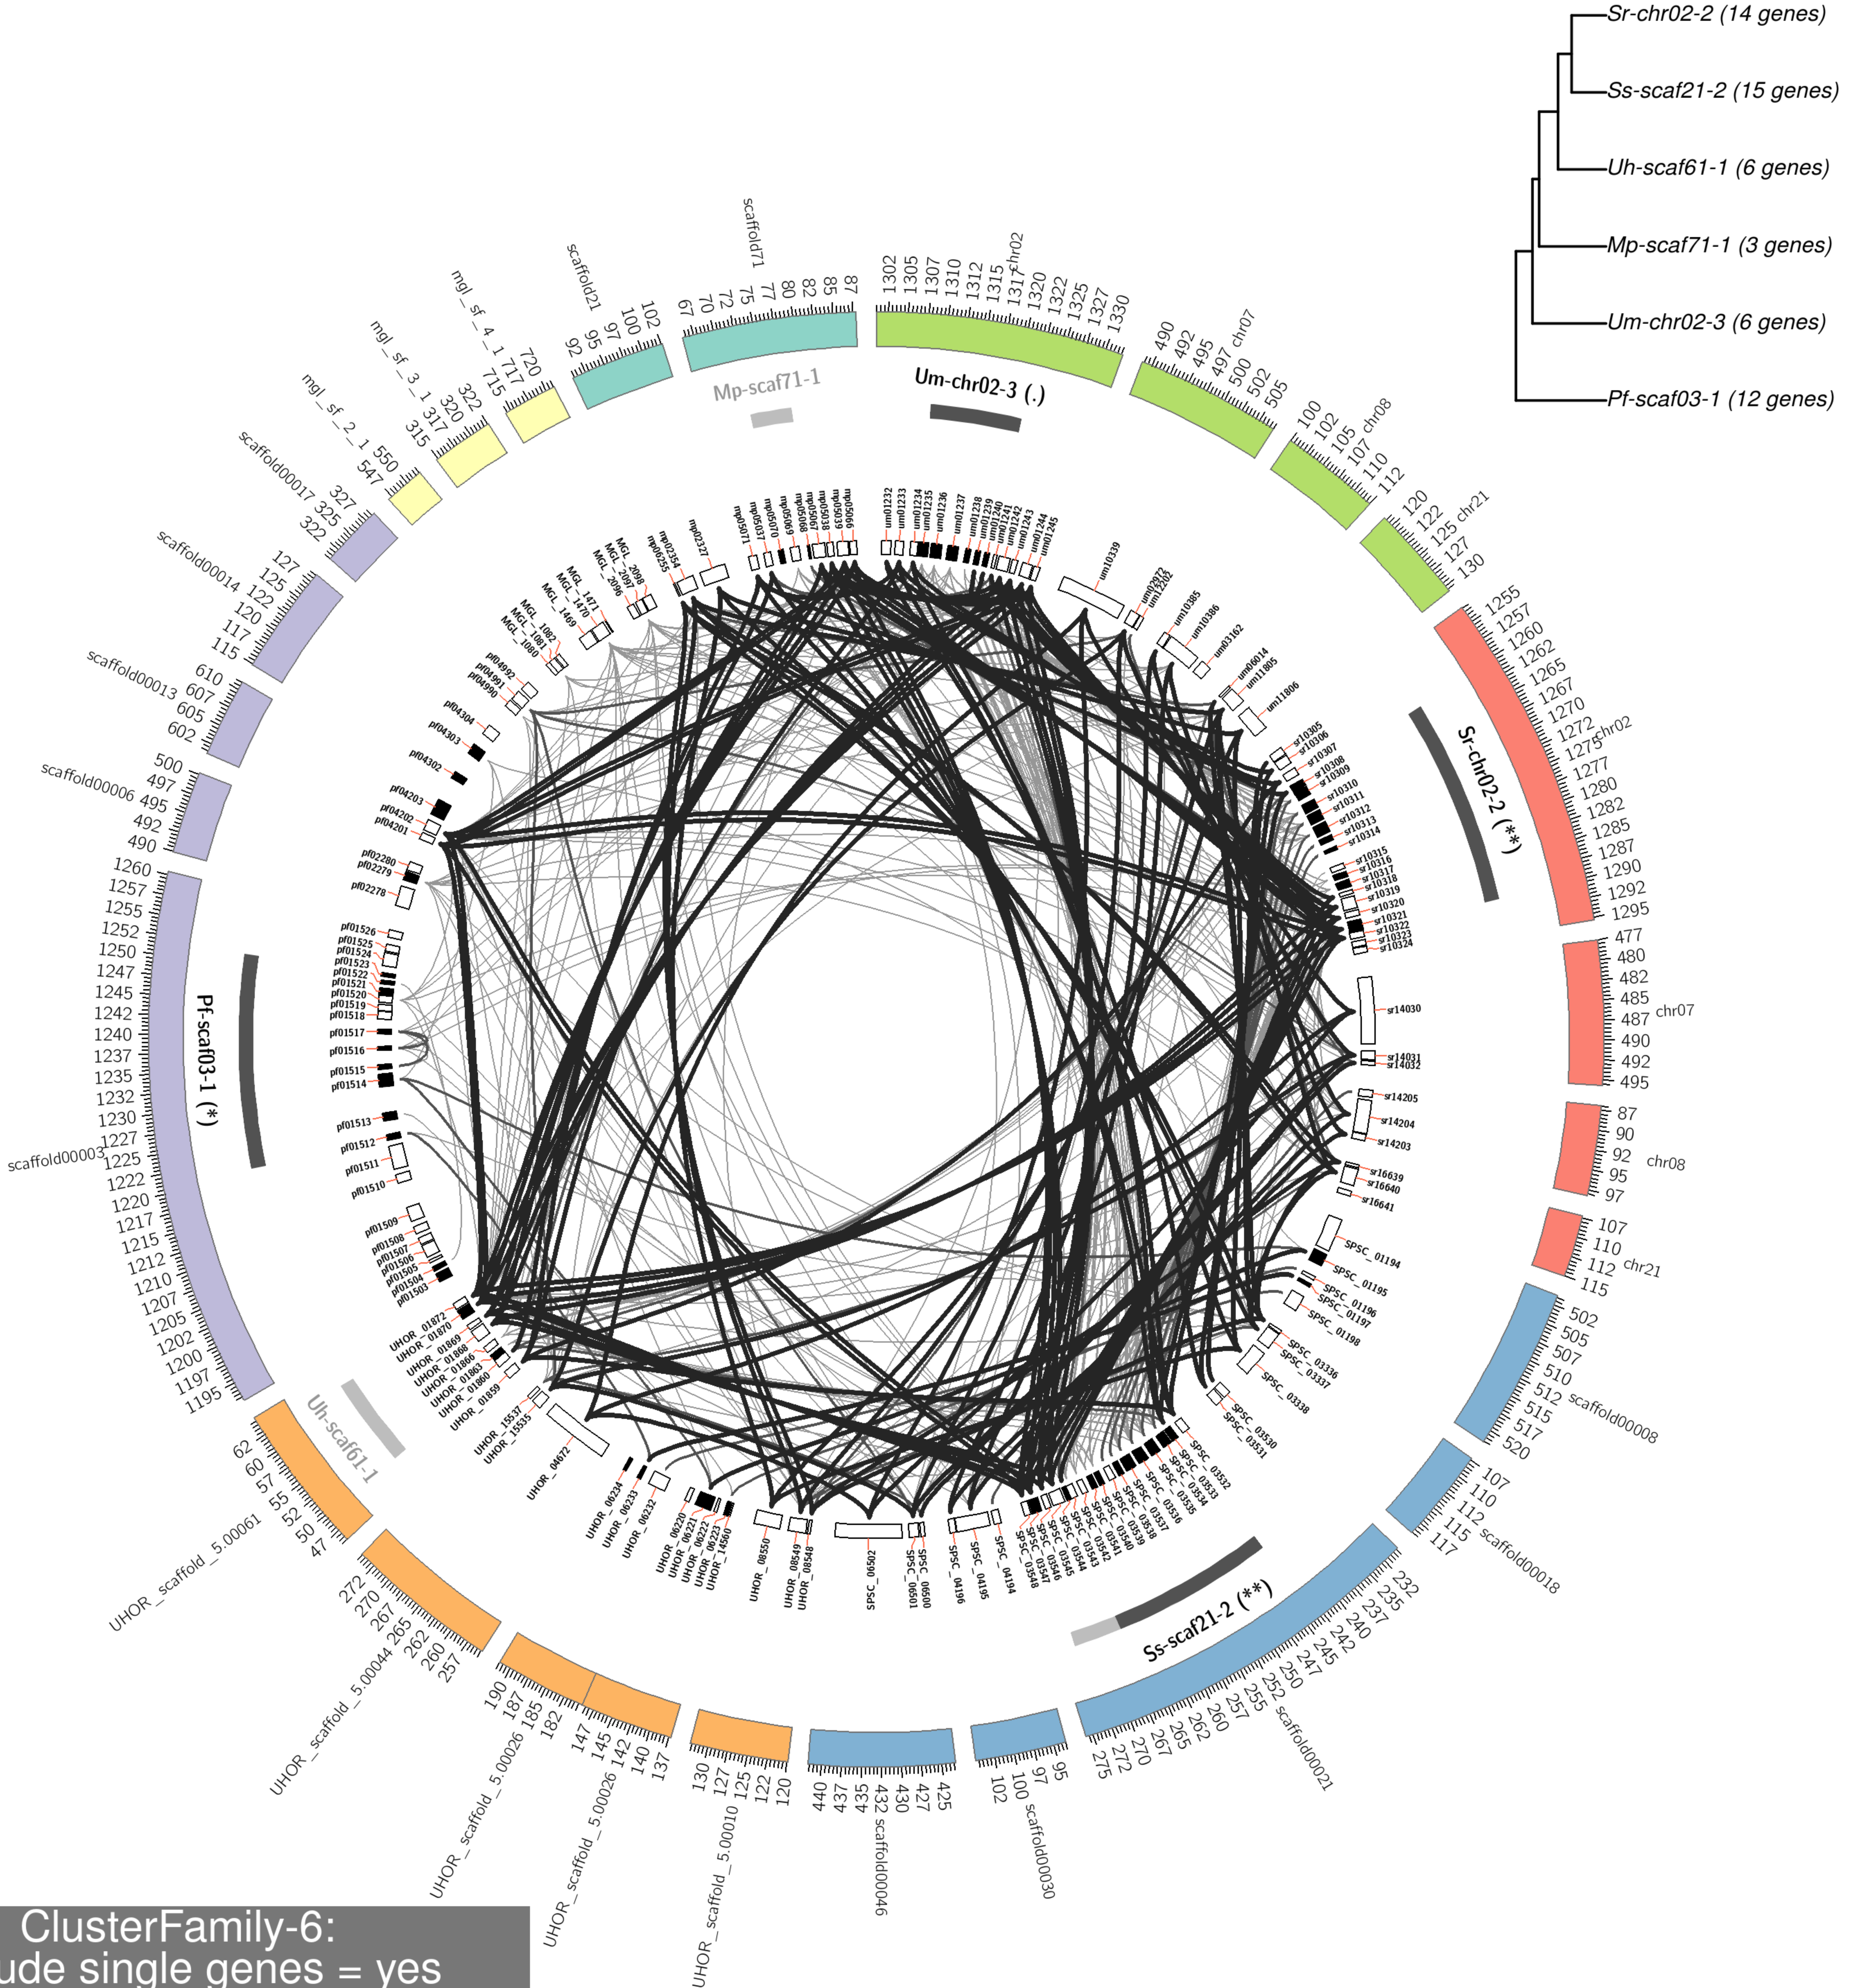

G)

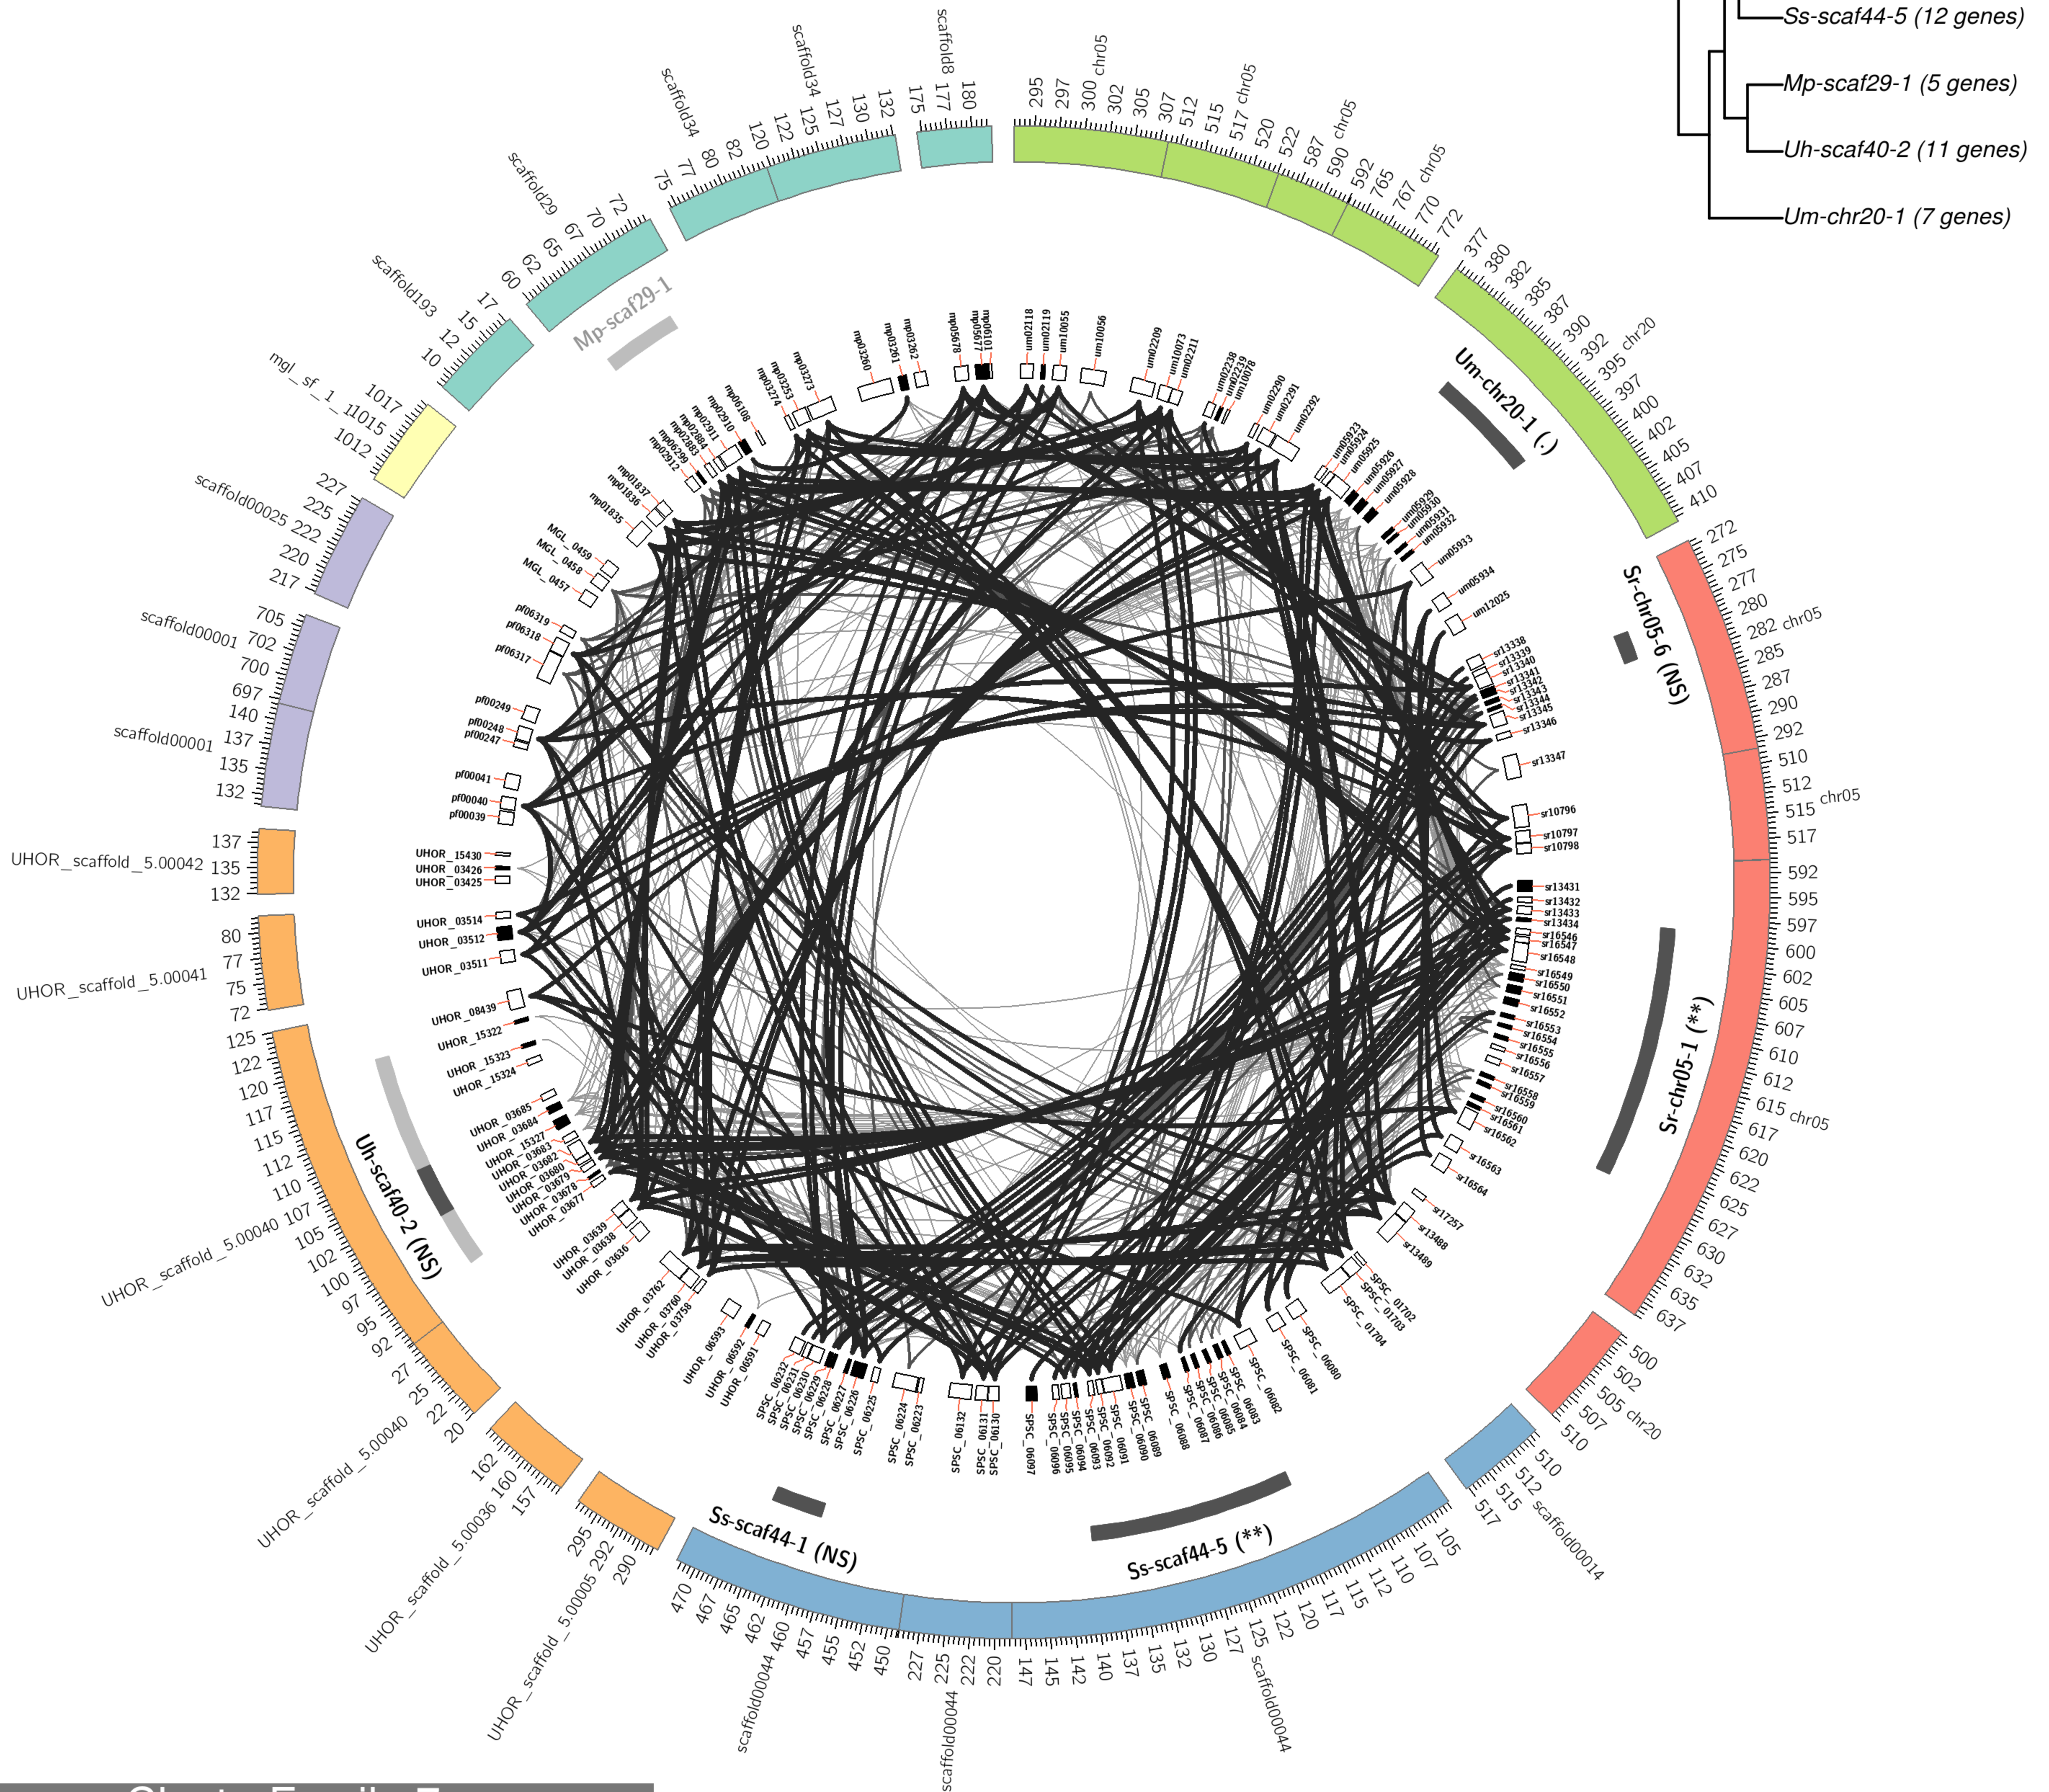

## ClusterFamily-7:

Include single genes = yes

Flanking genes (clusters) = 3

Flanking genes (single genes) = 1

H)

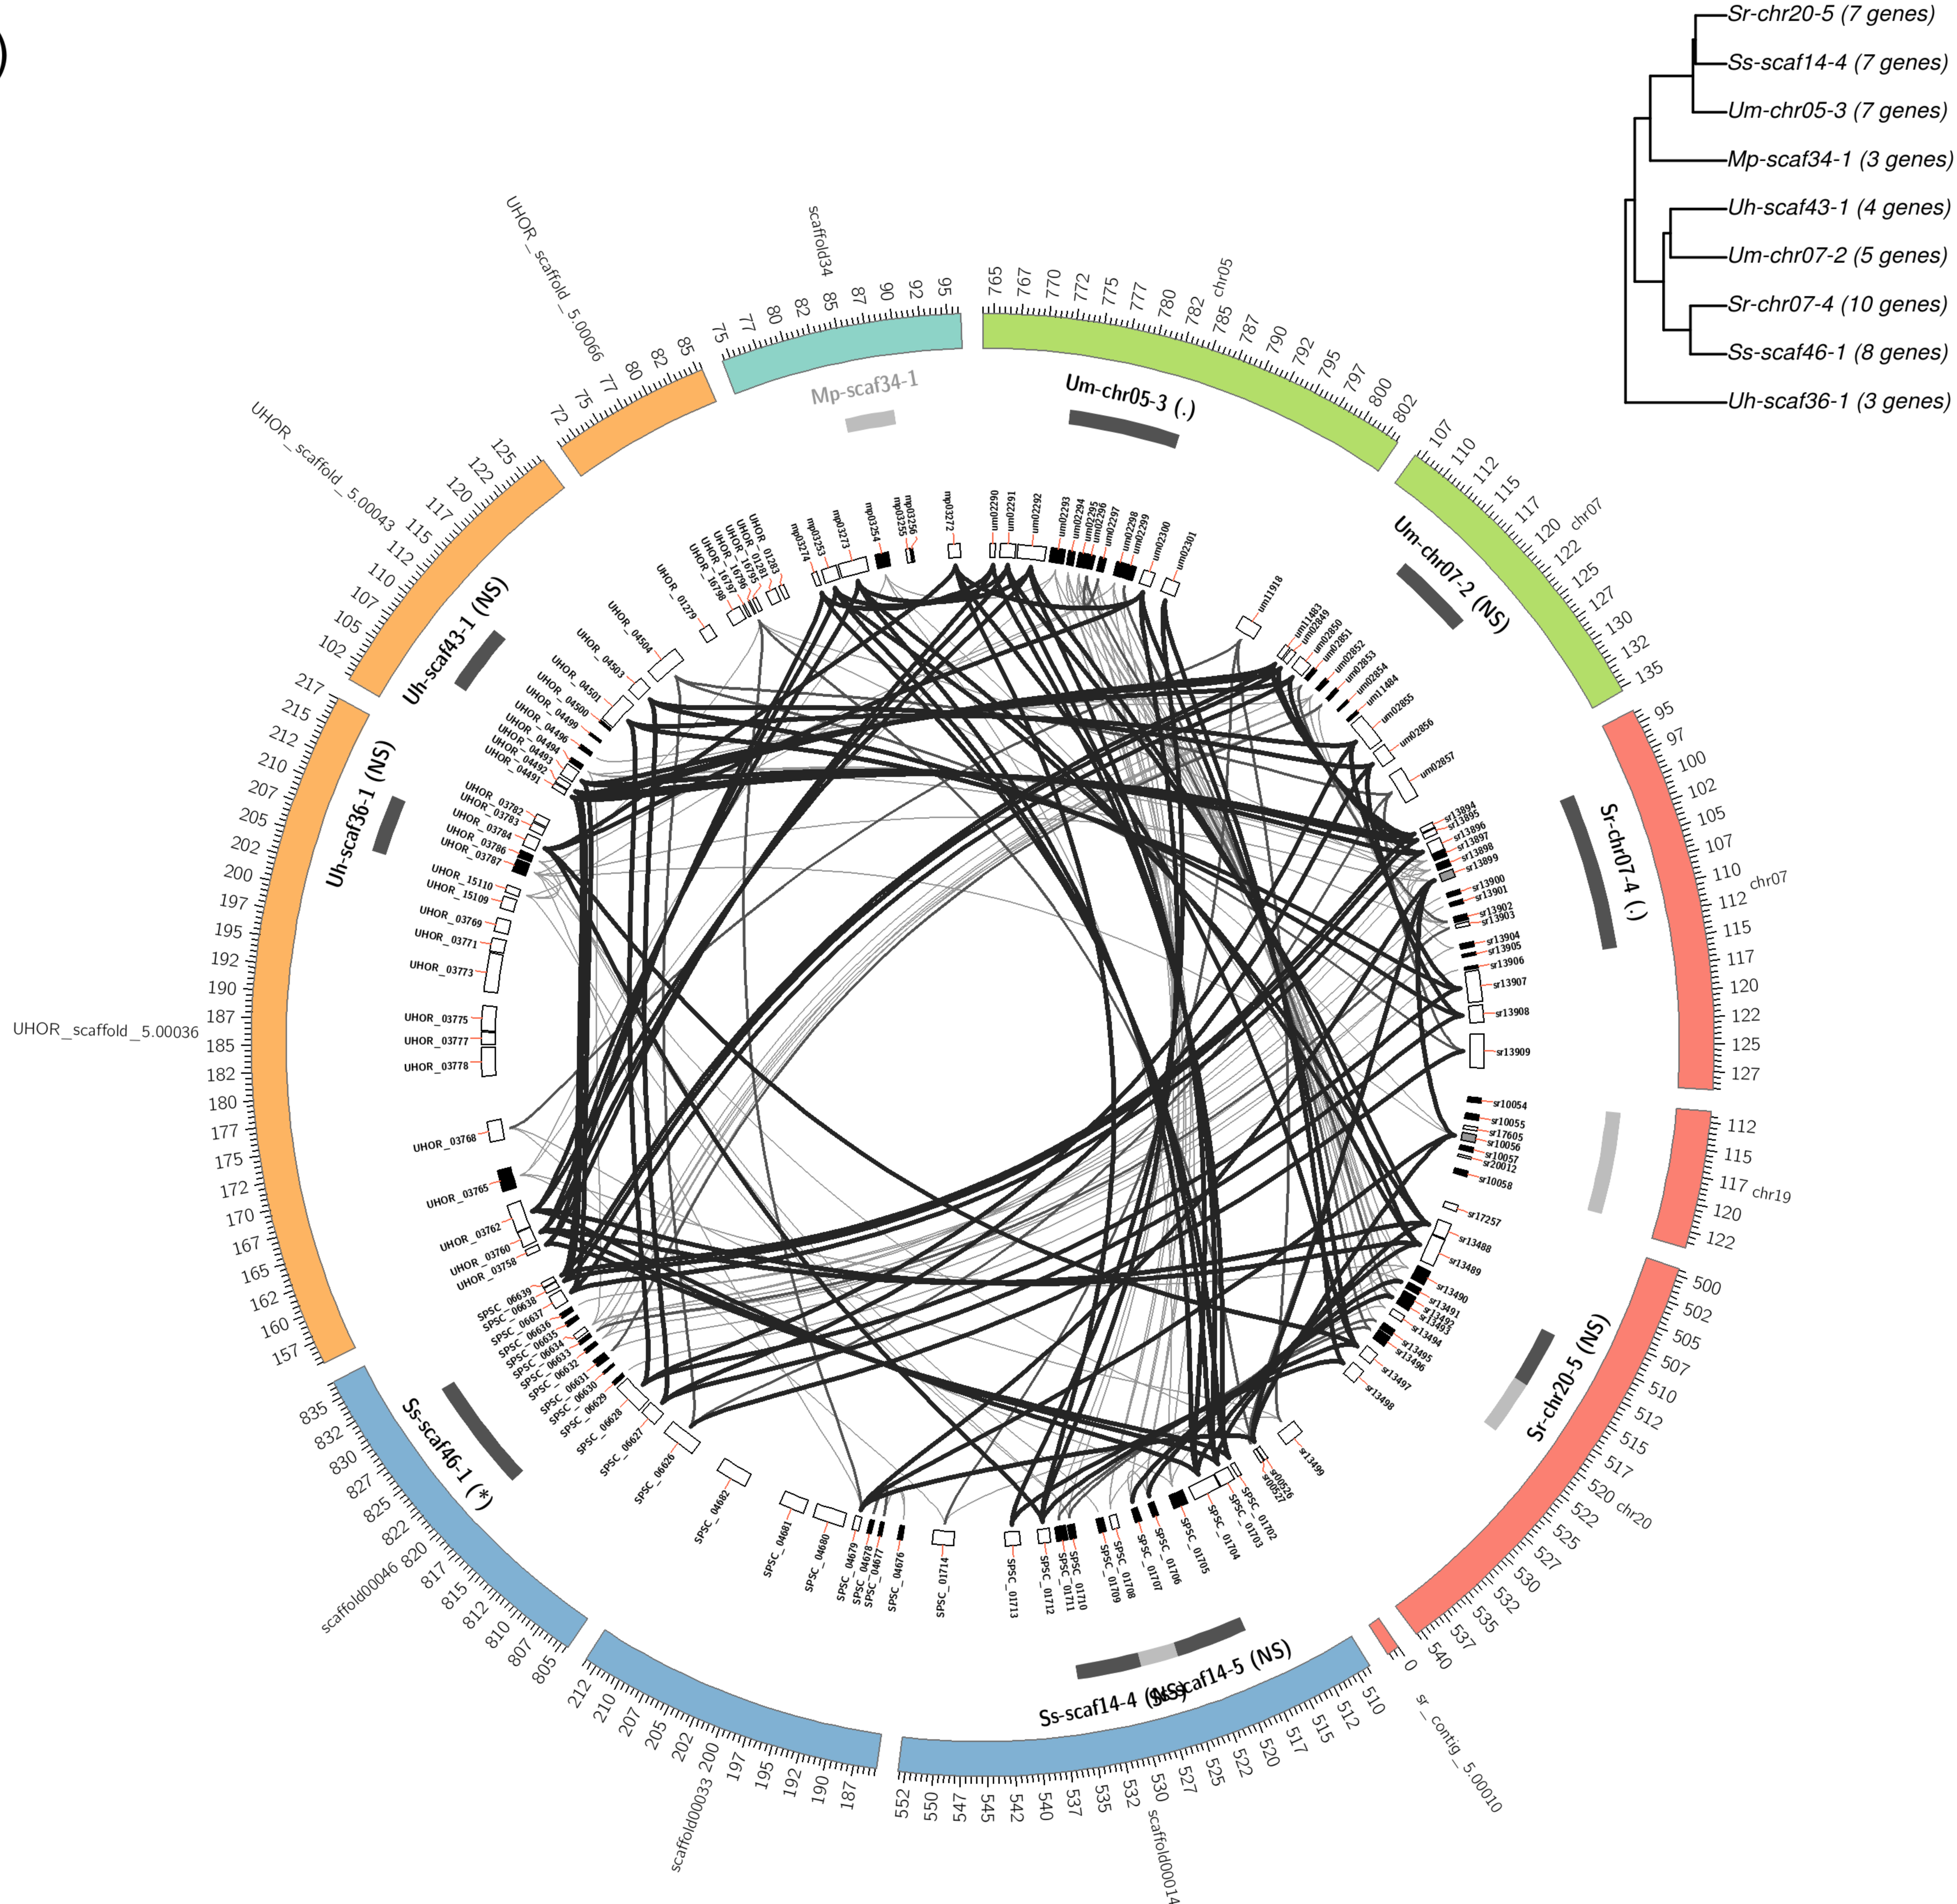

ClusterFamily-8:  
 Include single genes = yes  
 Flanking genes (clusters) = 3  
 Flanking genes (single genes) = 3

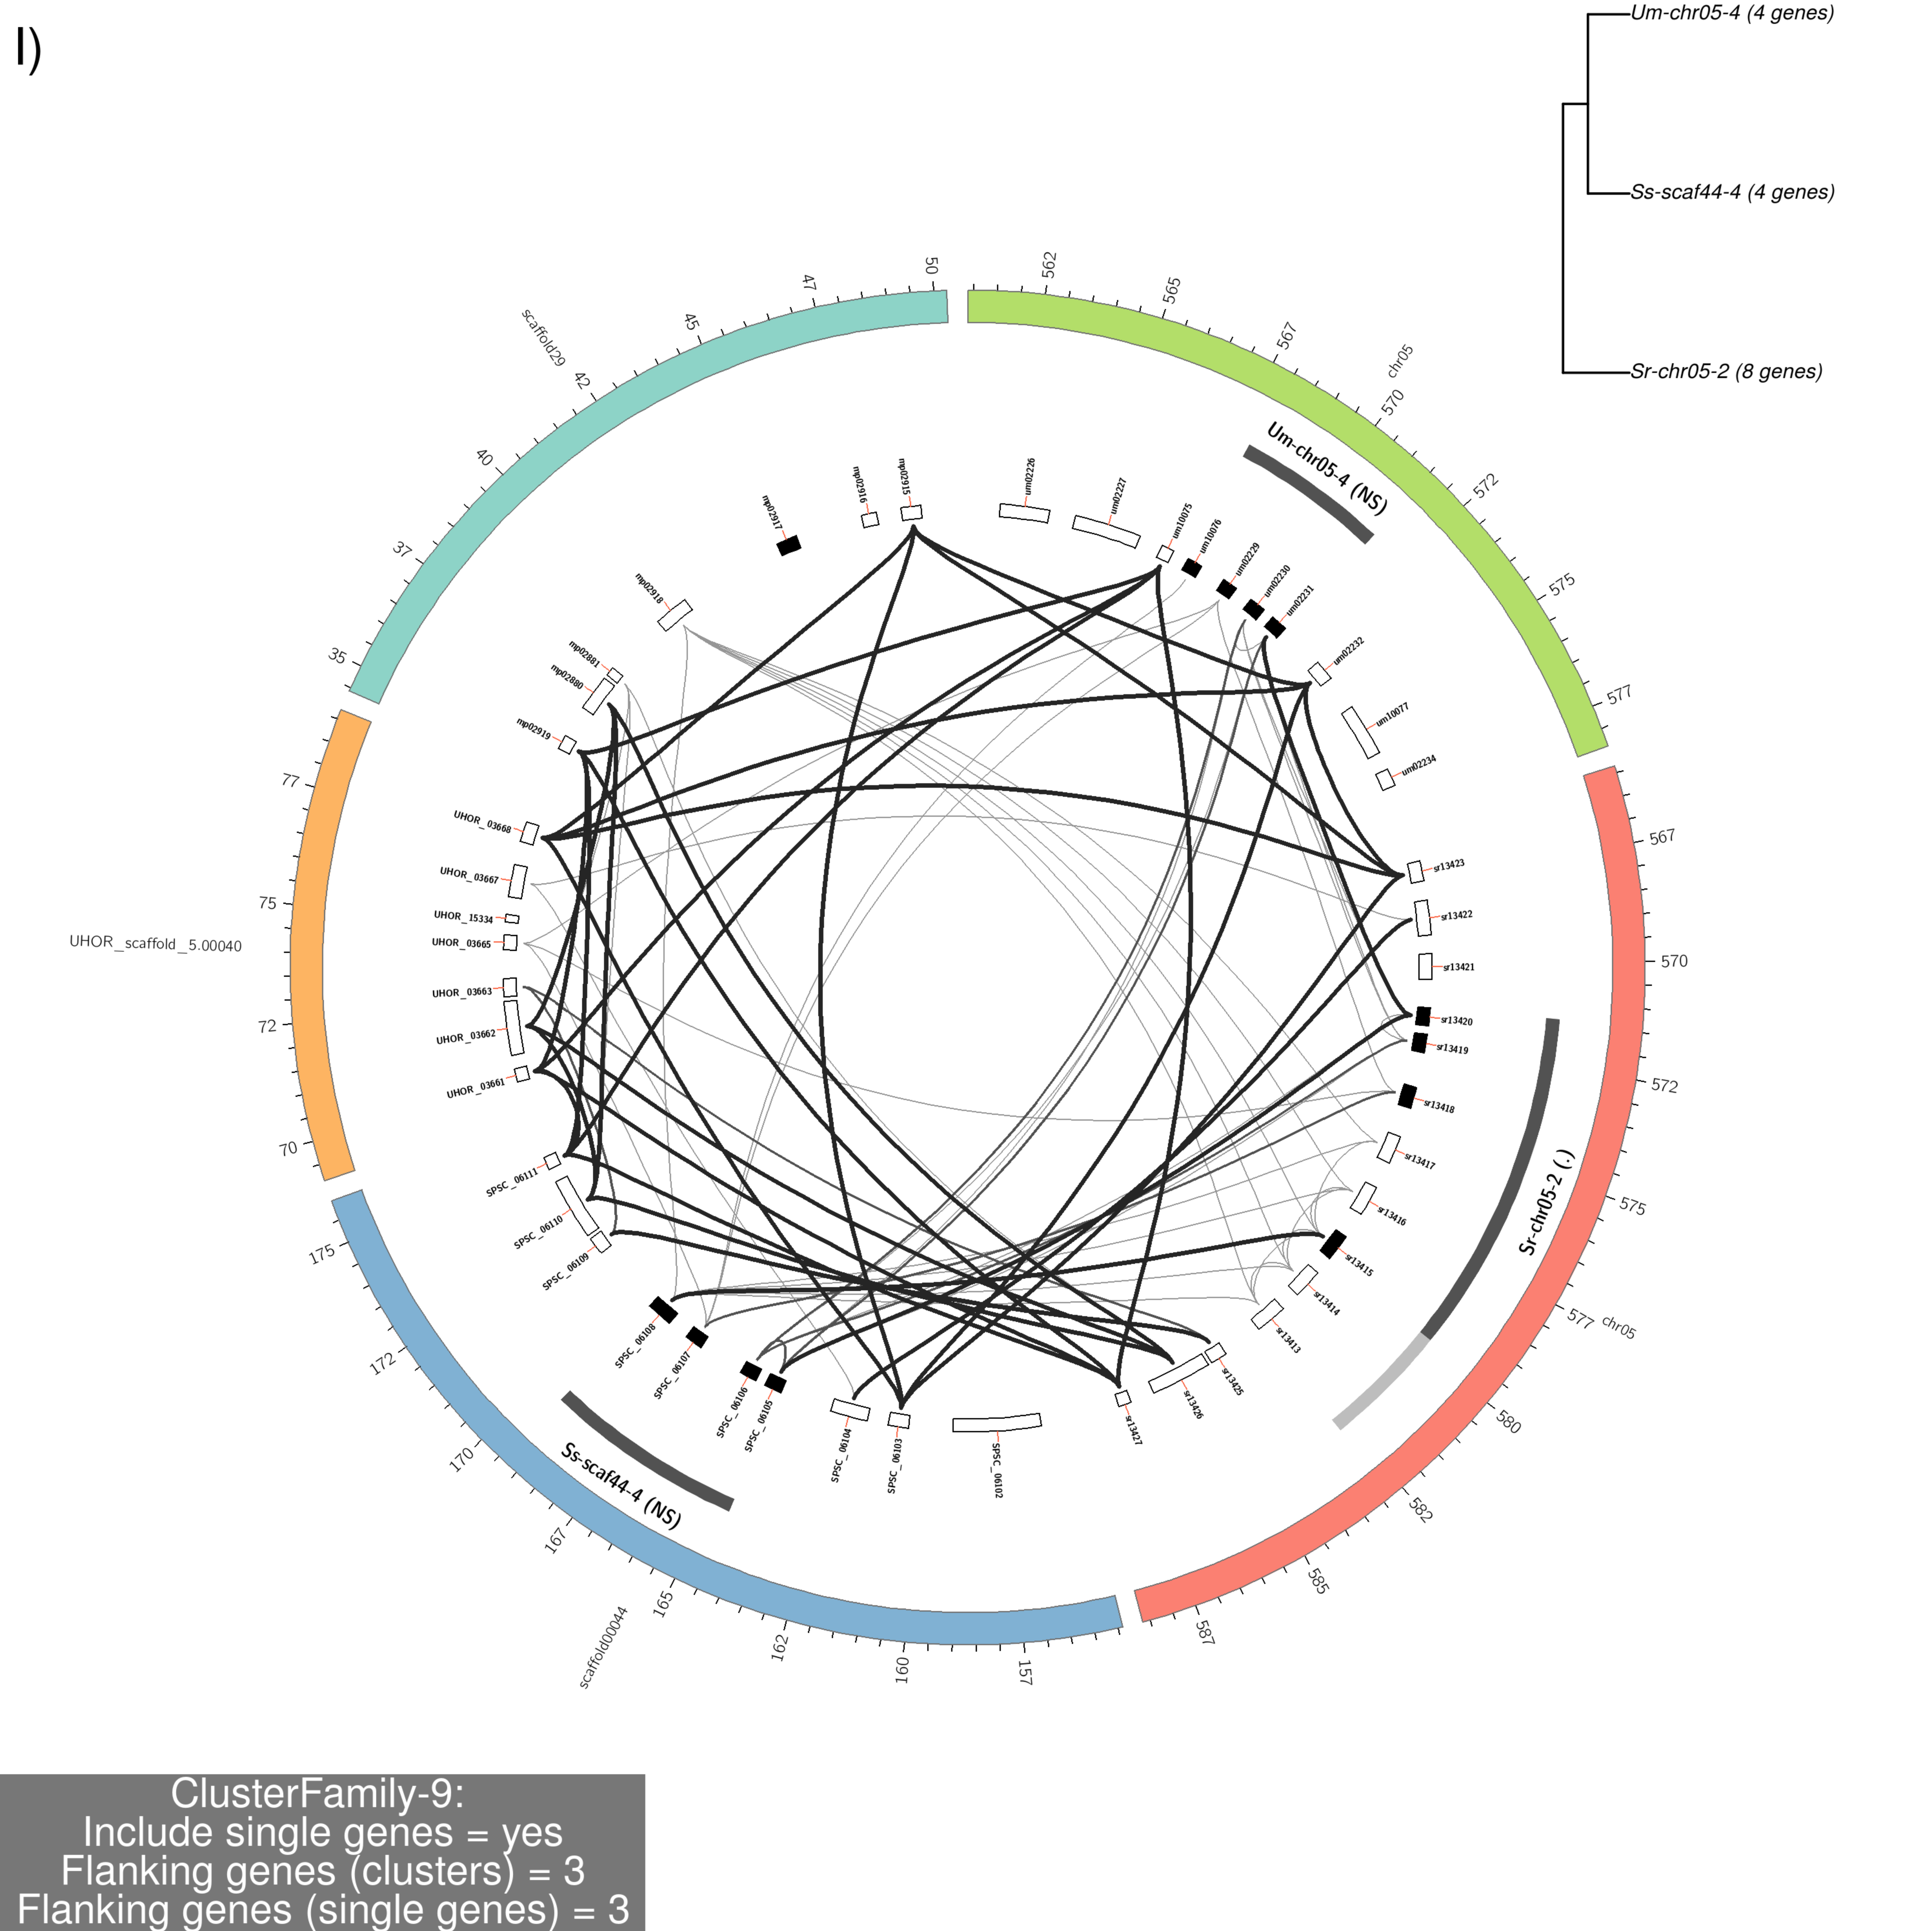

J)

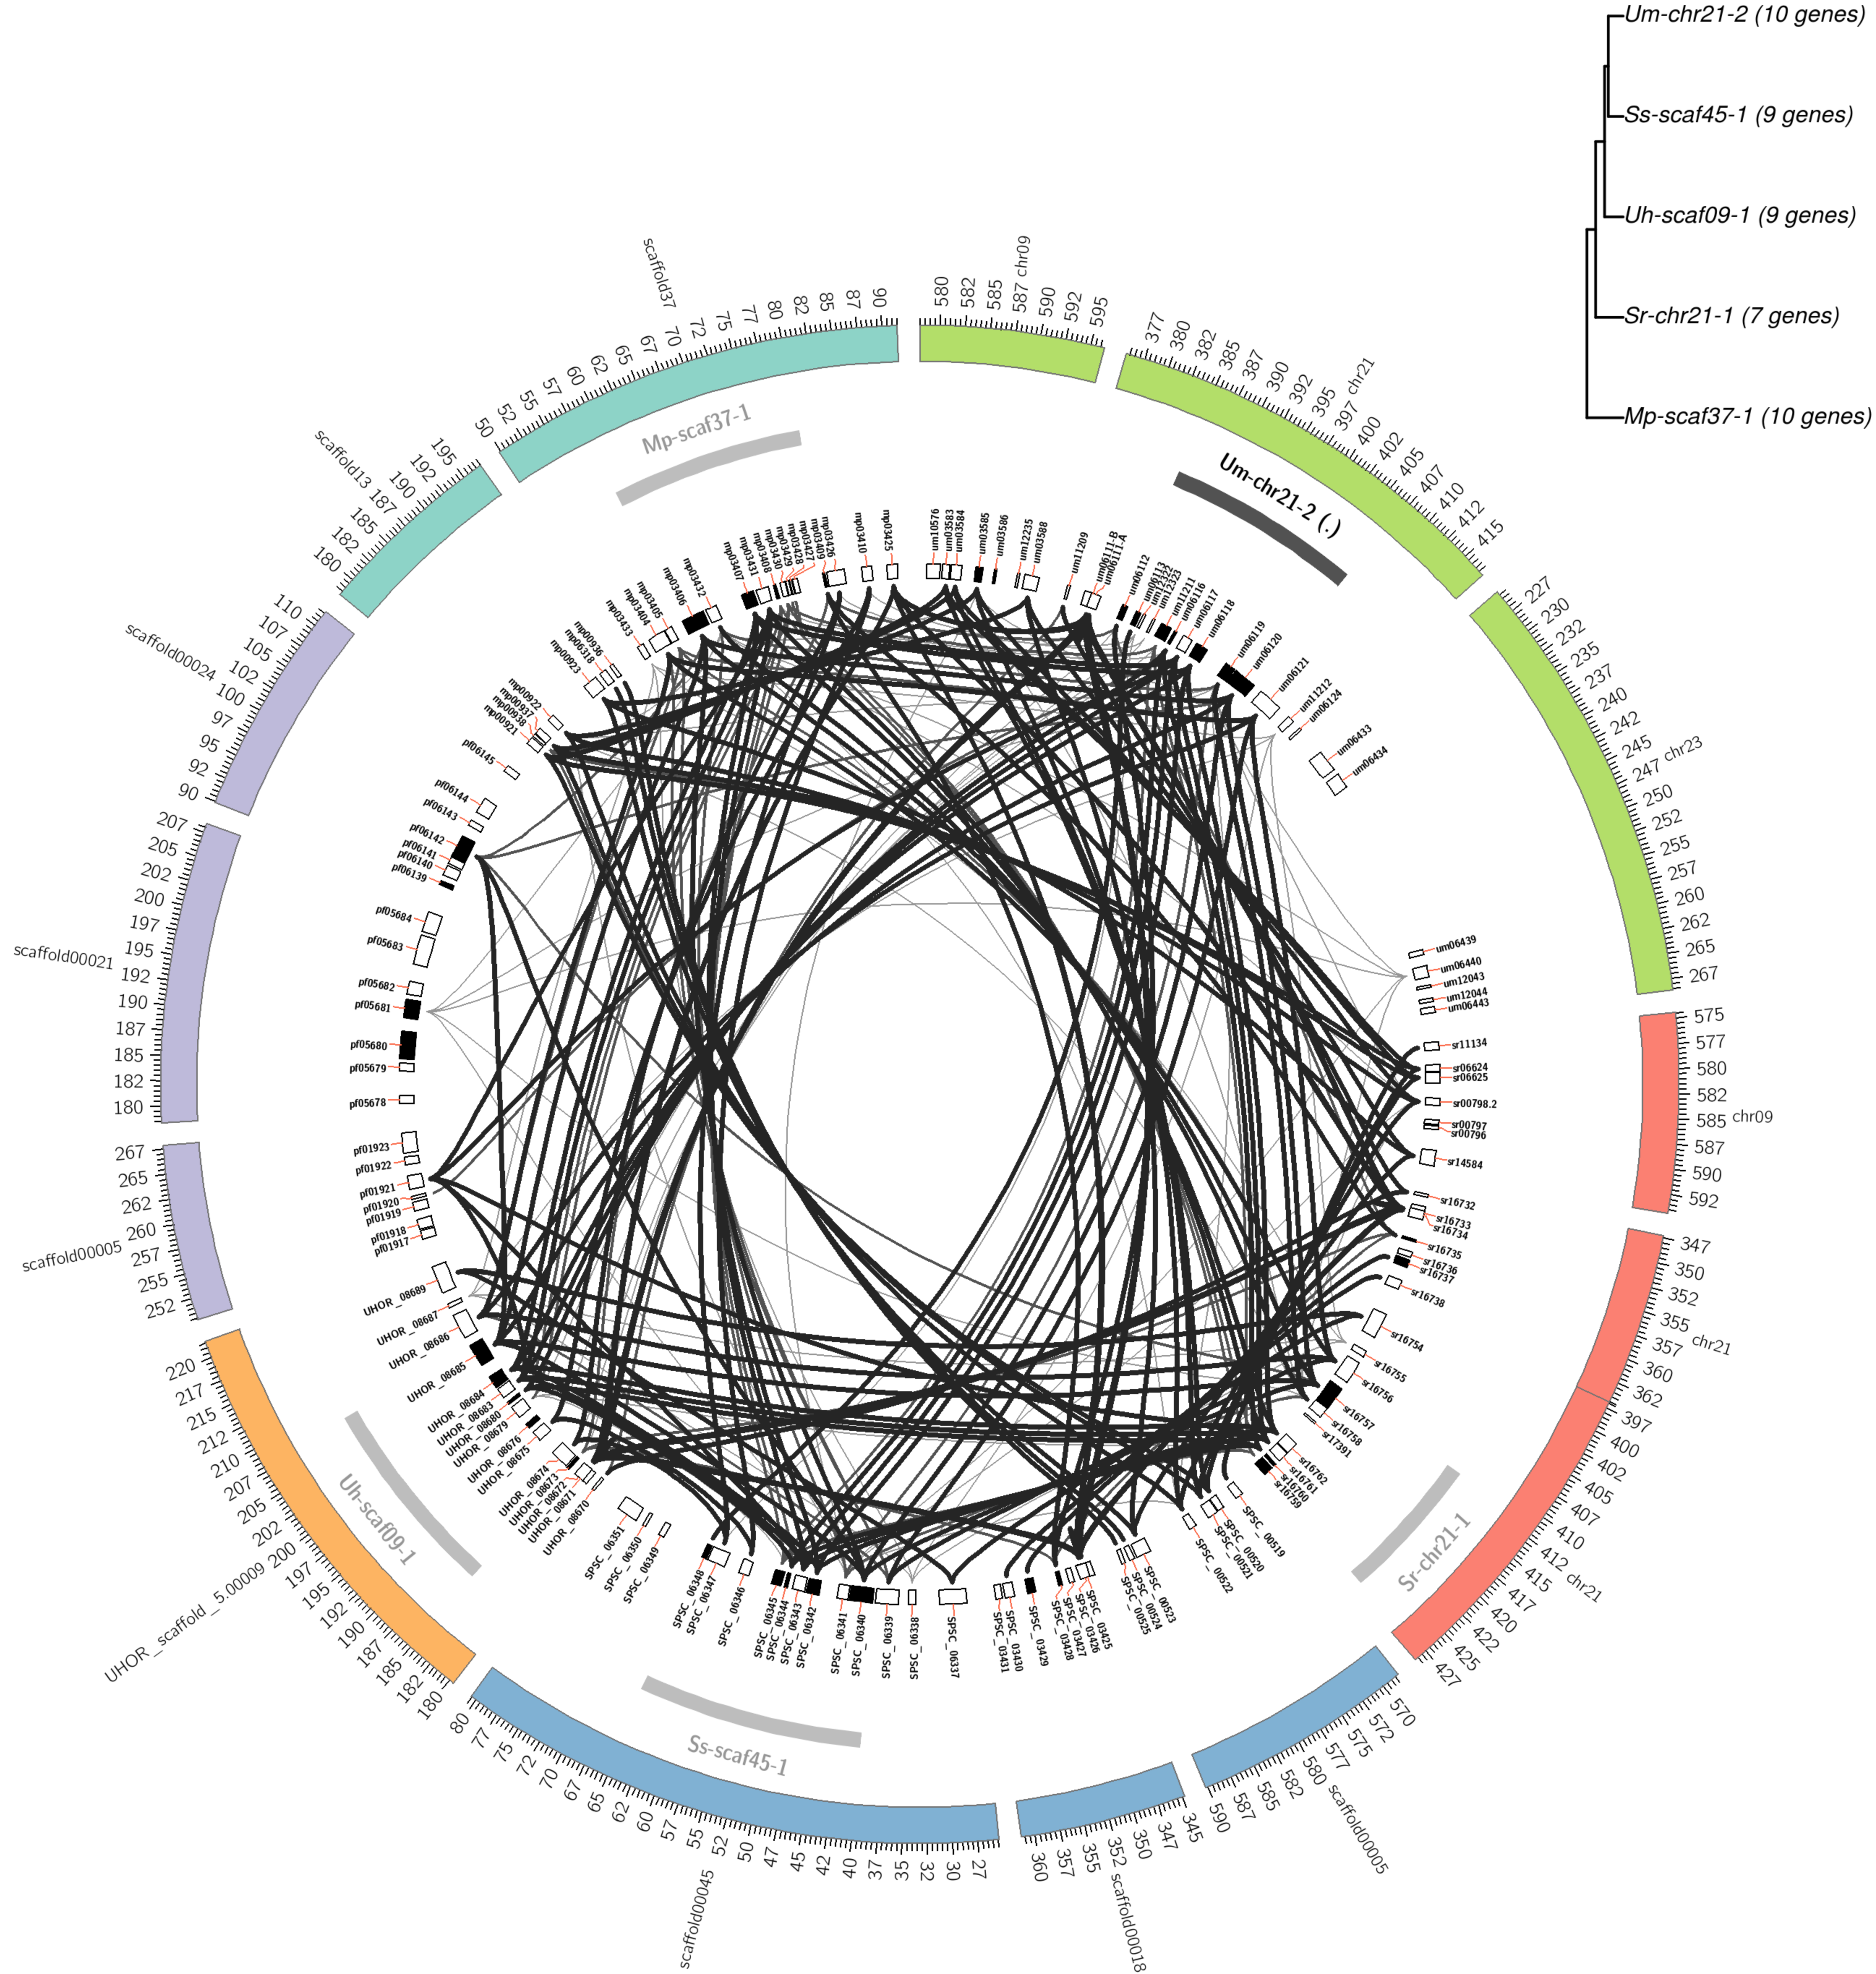

ClusterFamily-10:  
 Include single genes = yes  
 Flanking genes (clusters) = 3  
 Flanking genes (single genes) = 3

K)

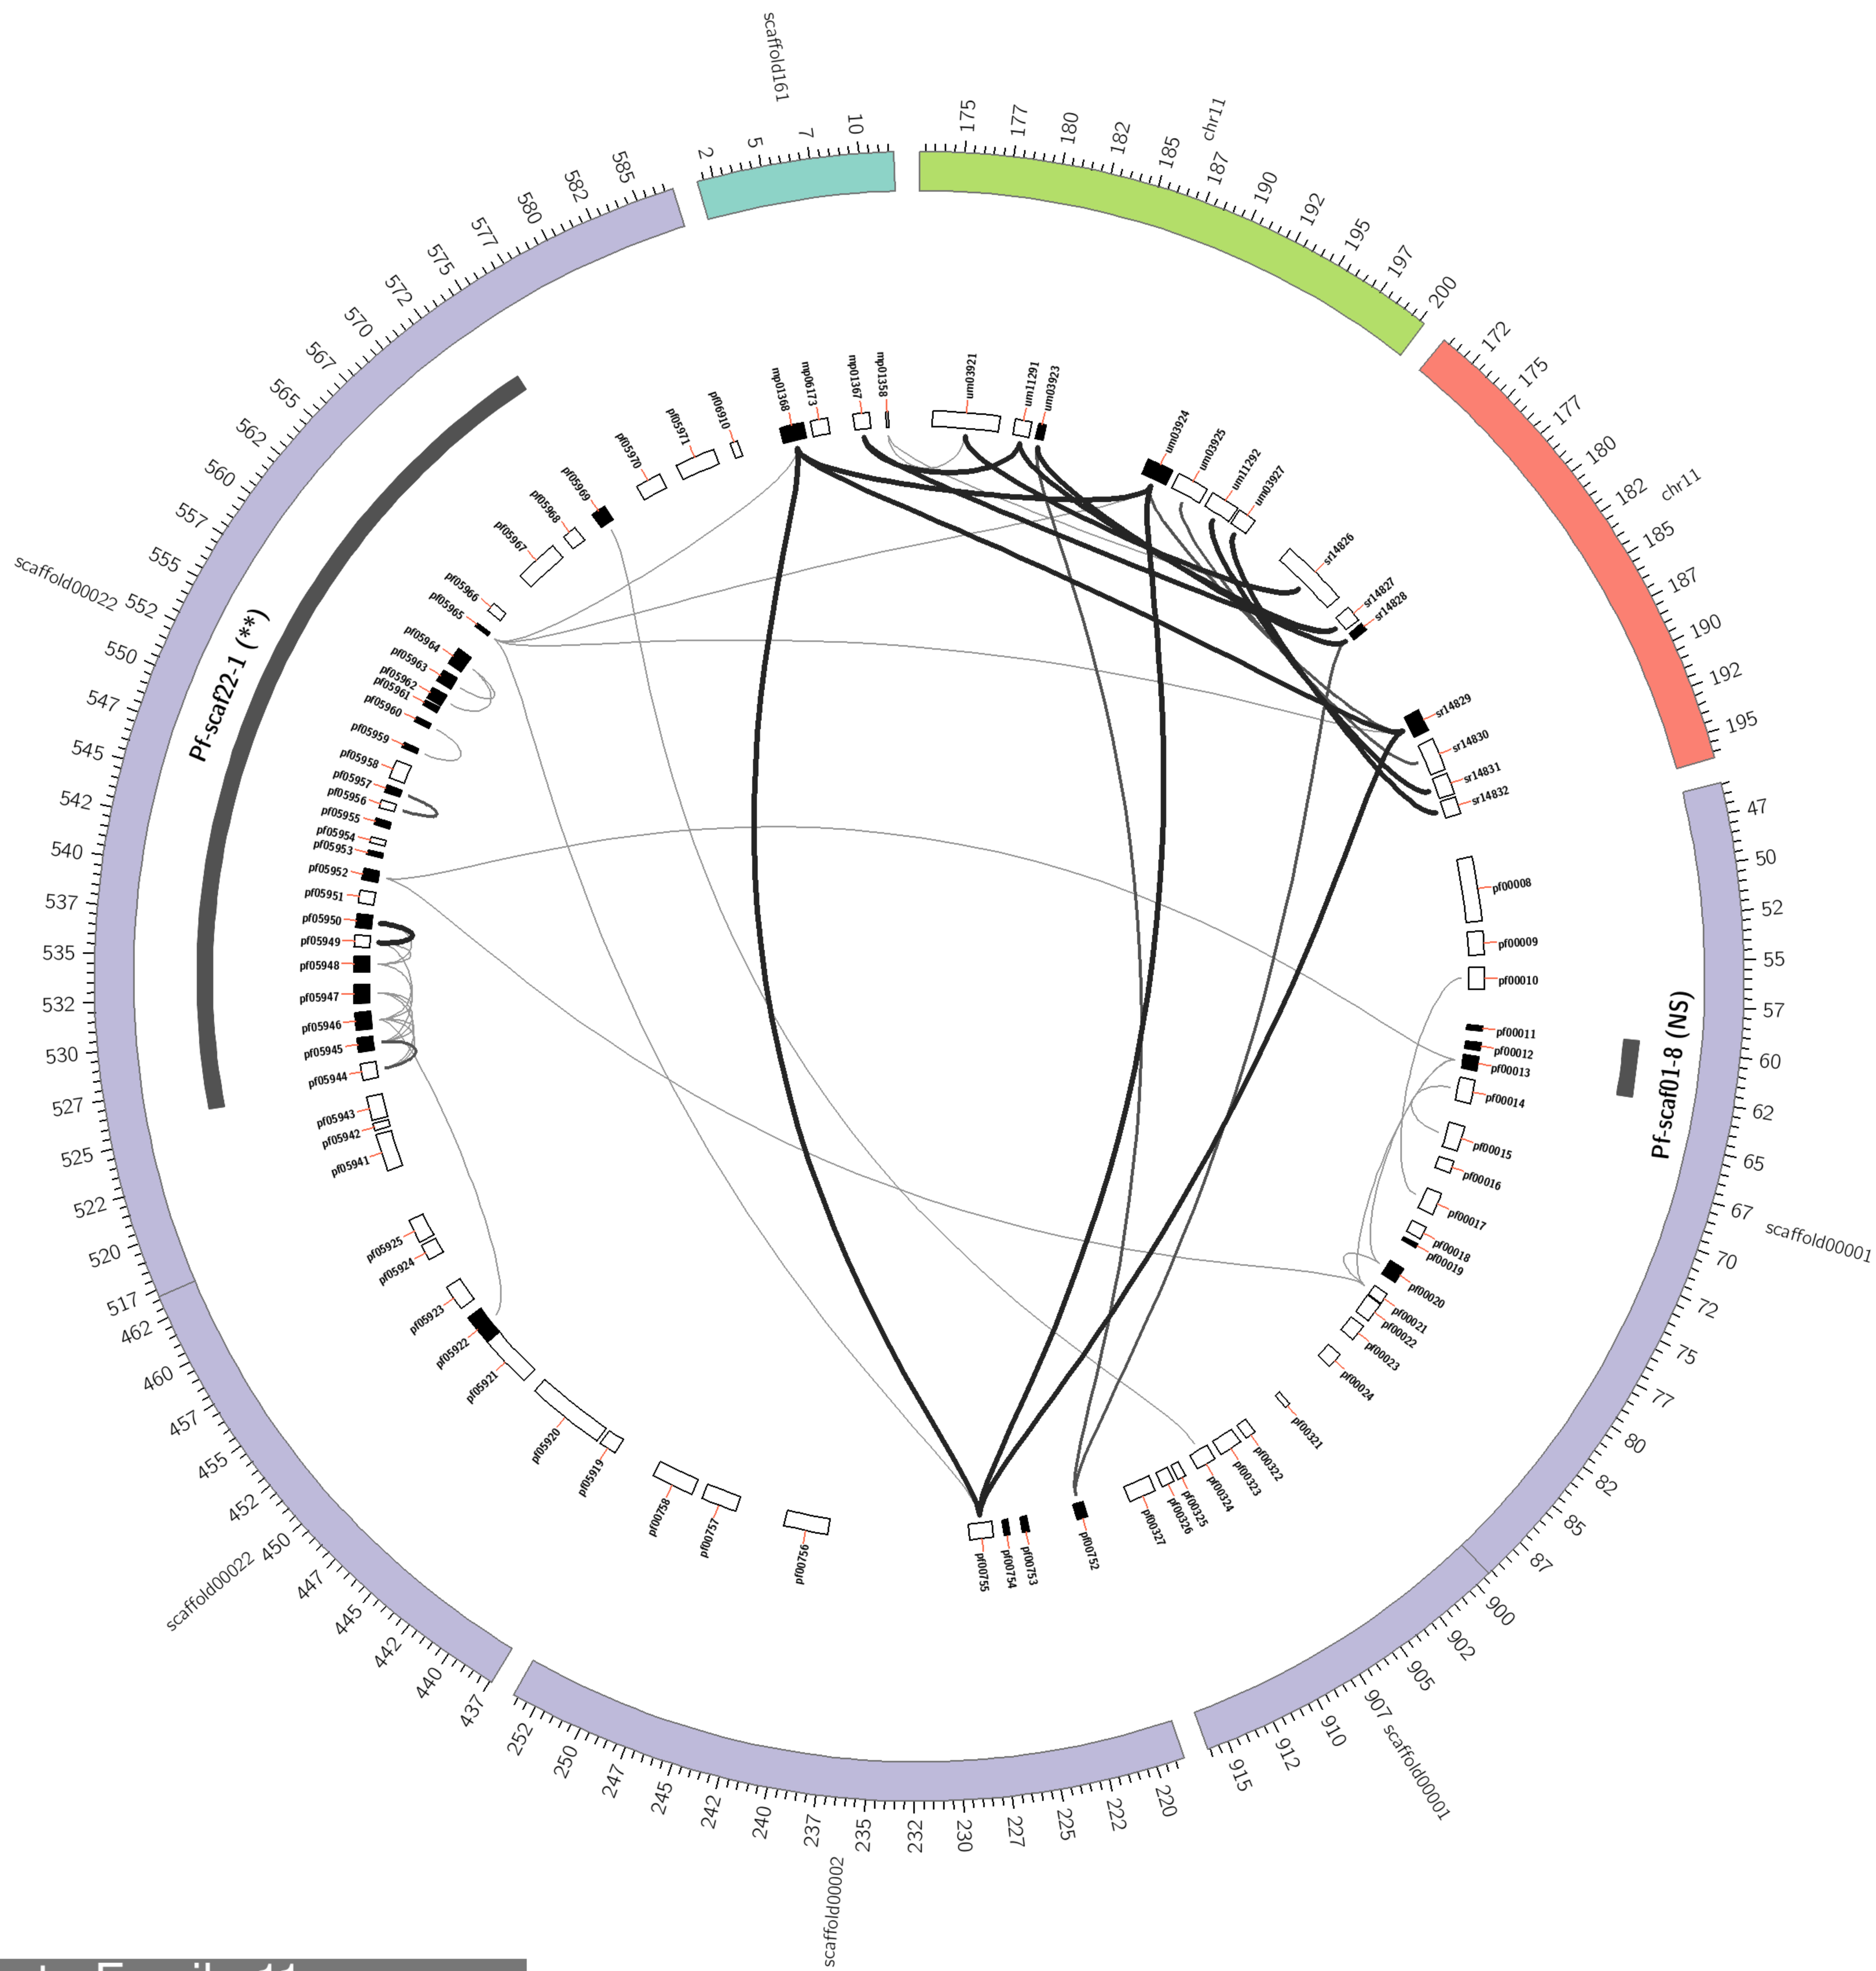

## ClusterFamily-11:

Include single genes = yes

## Flanking genes (clusters) = 3

Flanking genes (single genes) = 3

L)

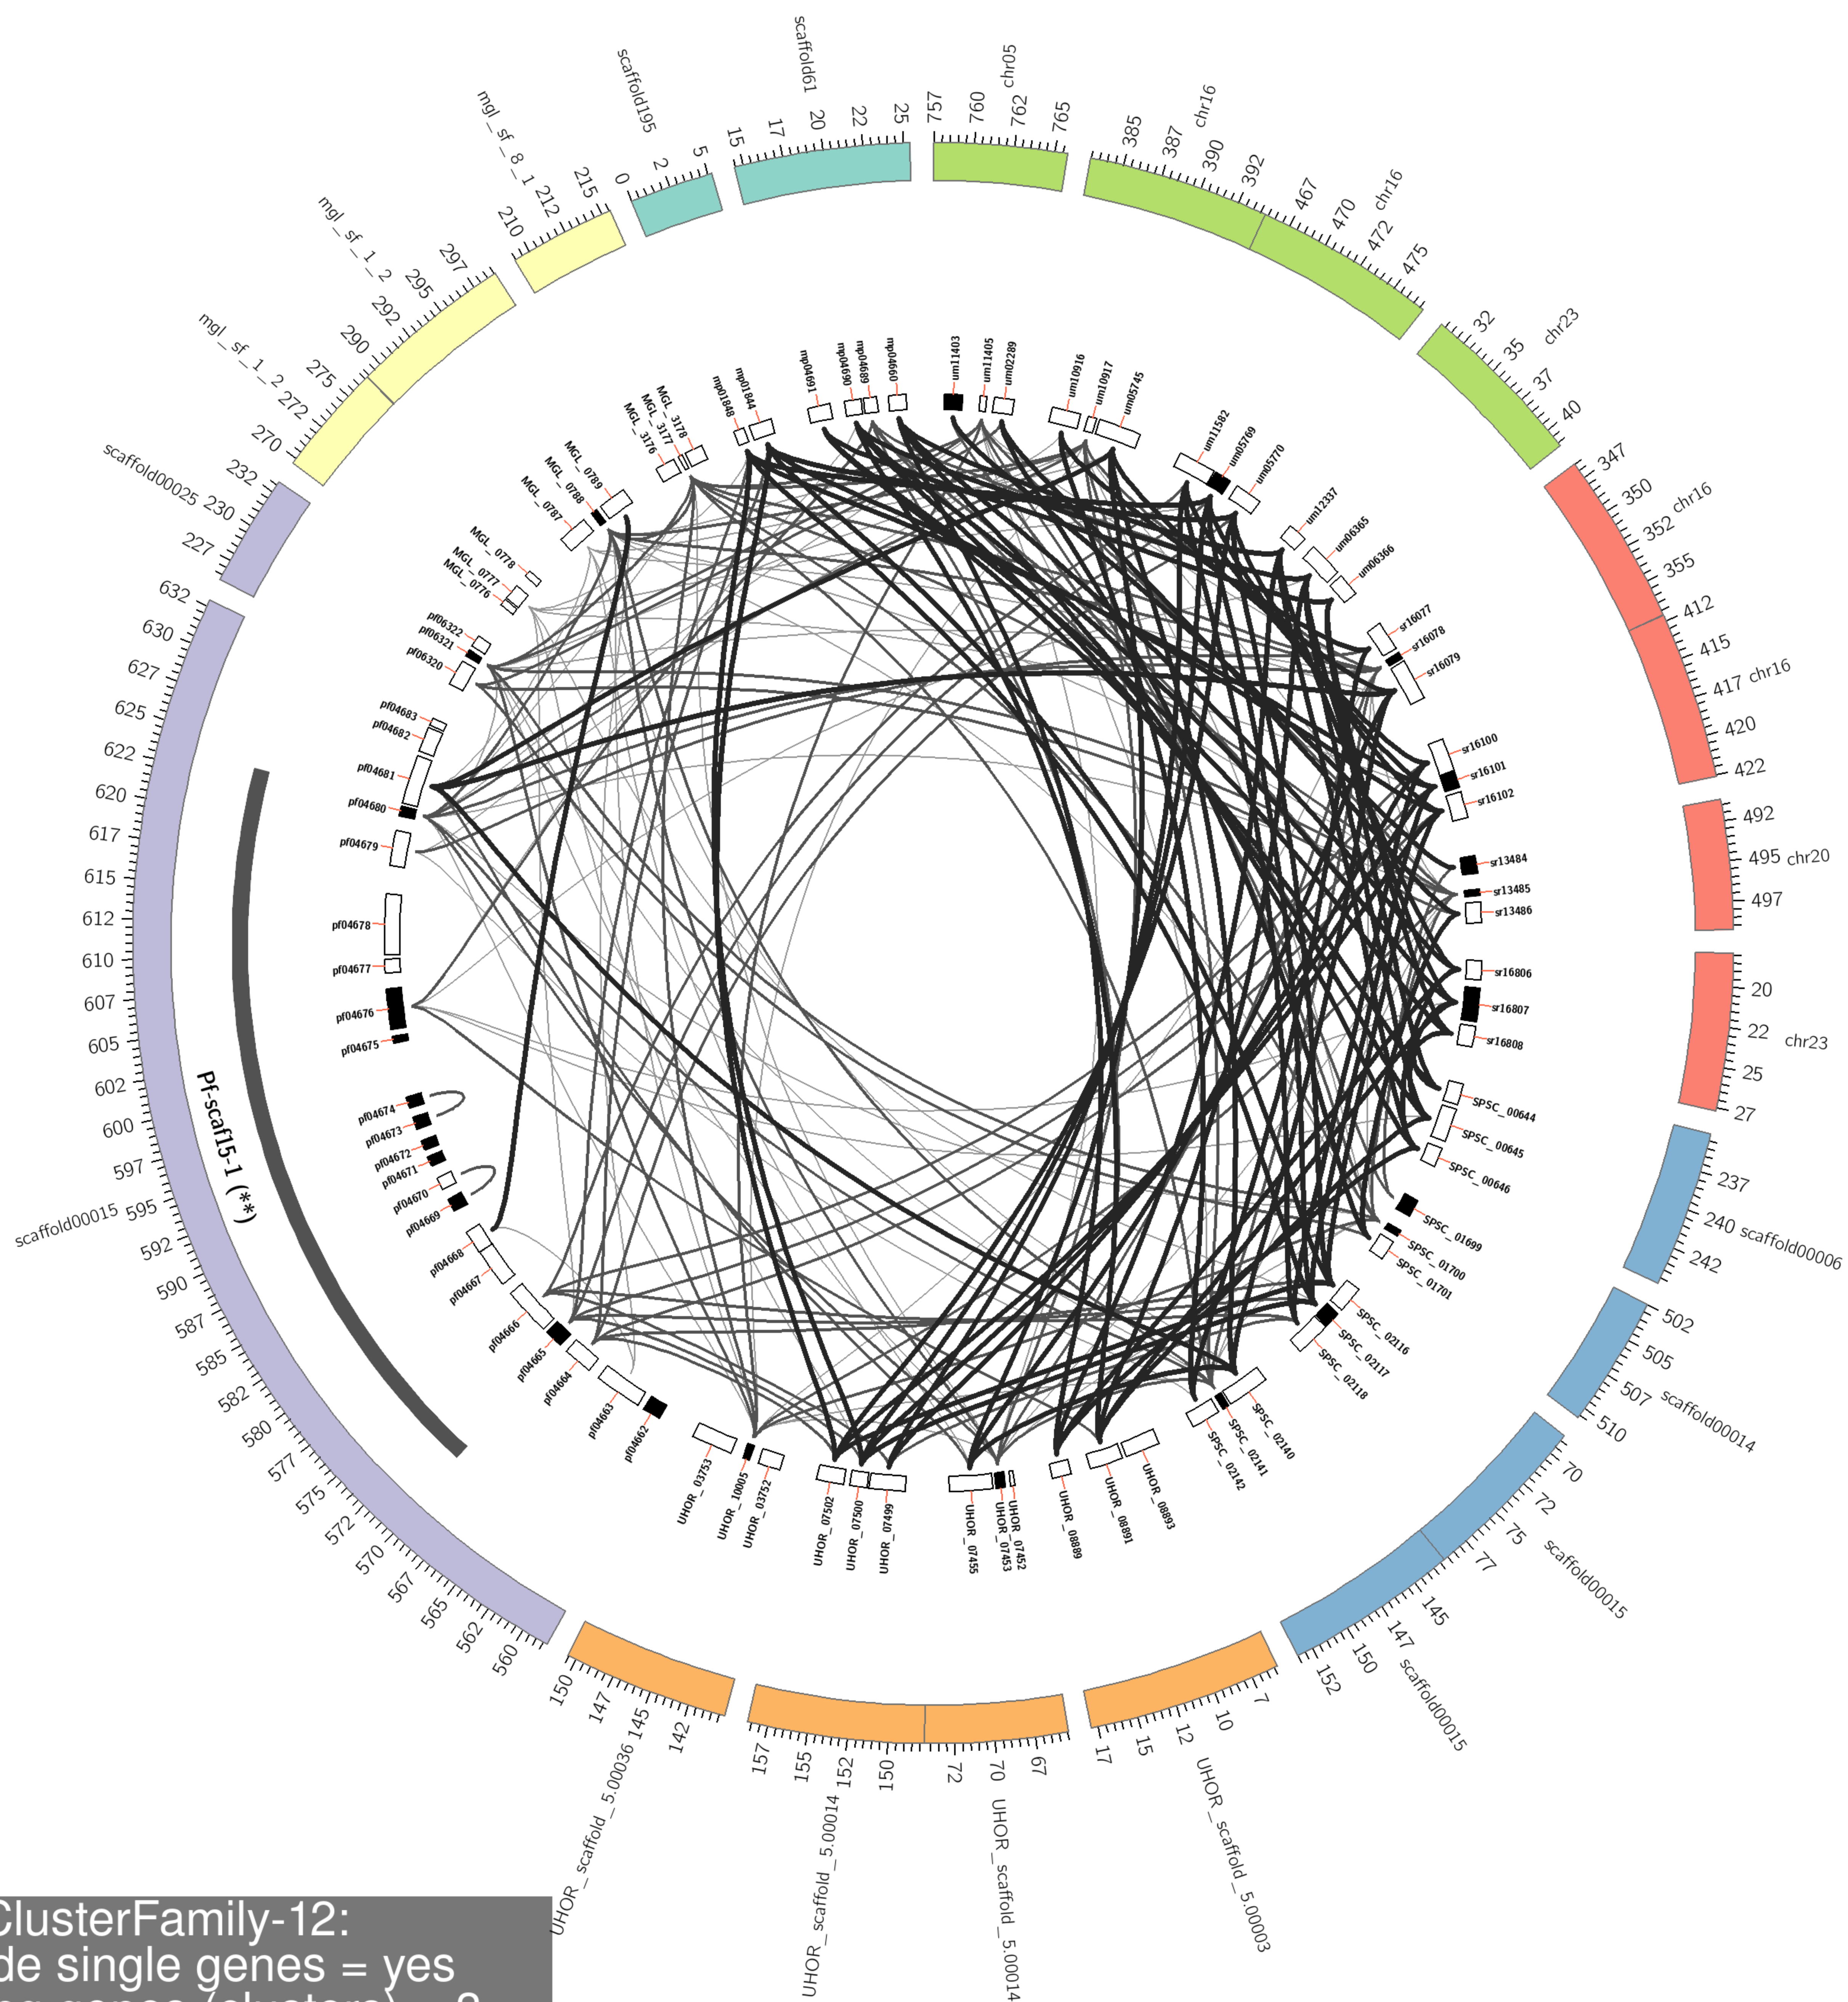

## ClusterFamily-12:

Include single genes = yes

Flanking genes (clusters) = 3

Ranking genes (single genes) = 1

M)

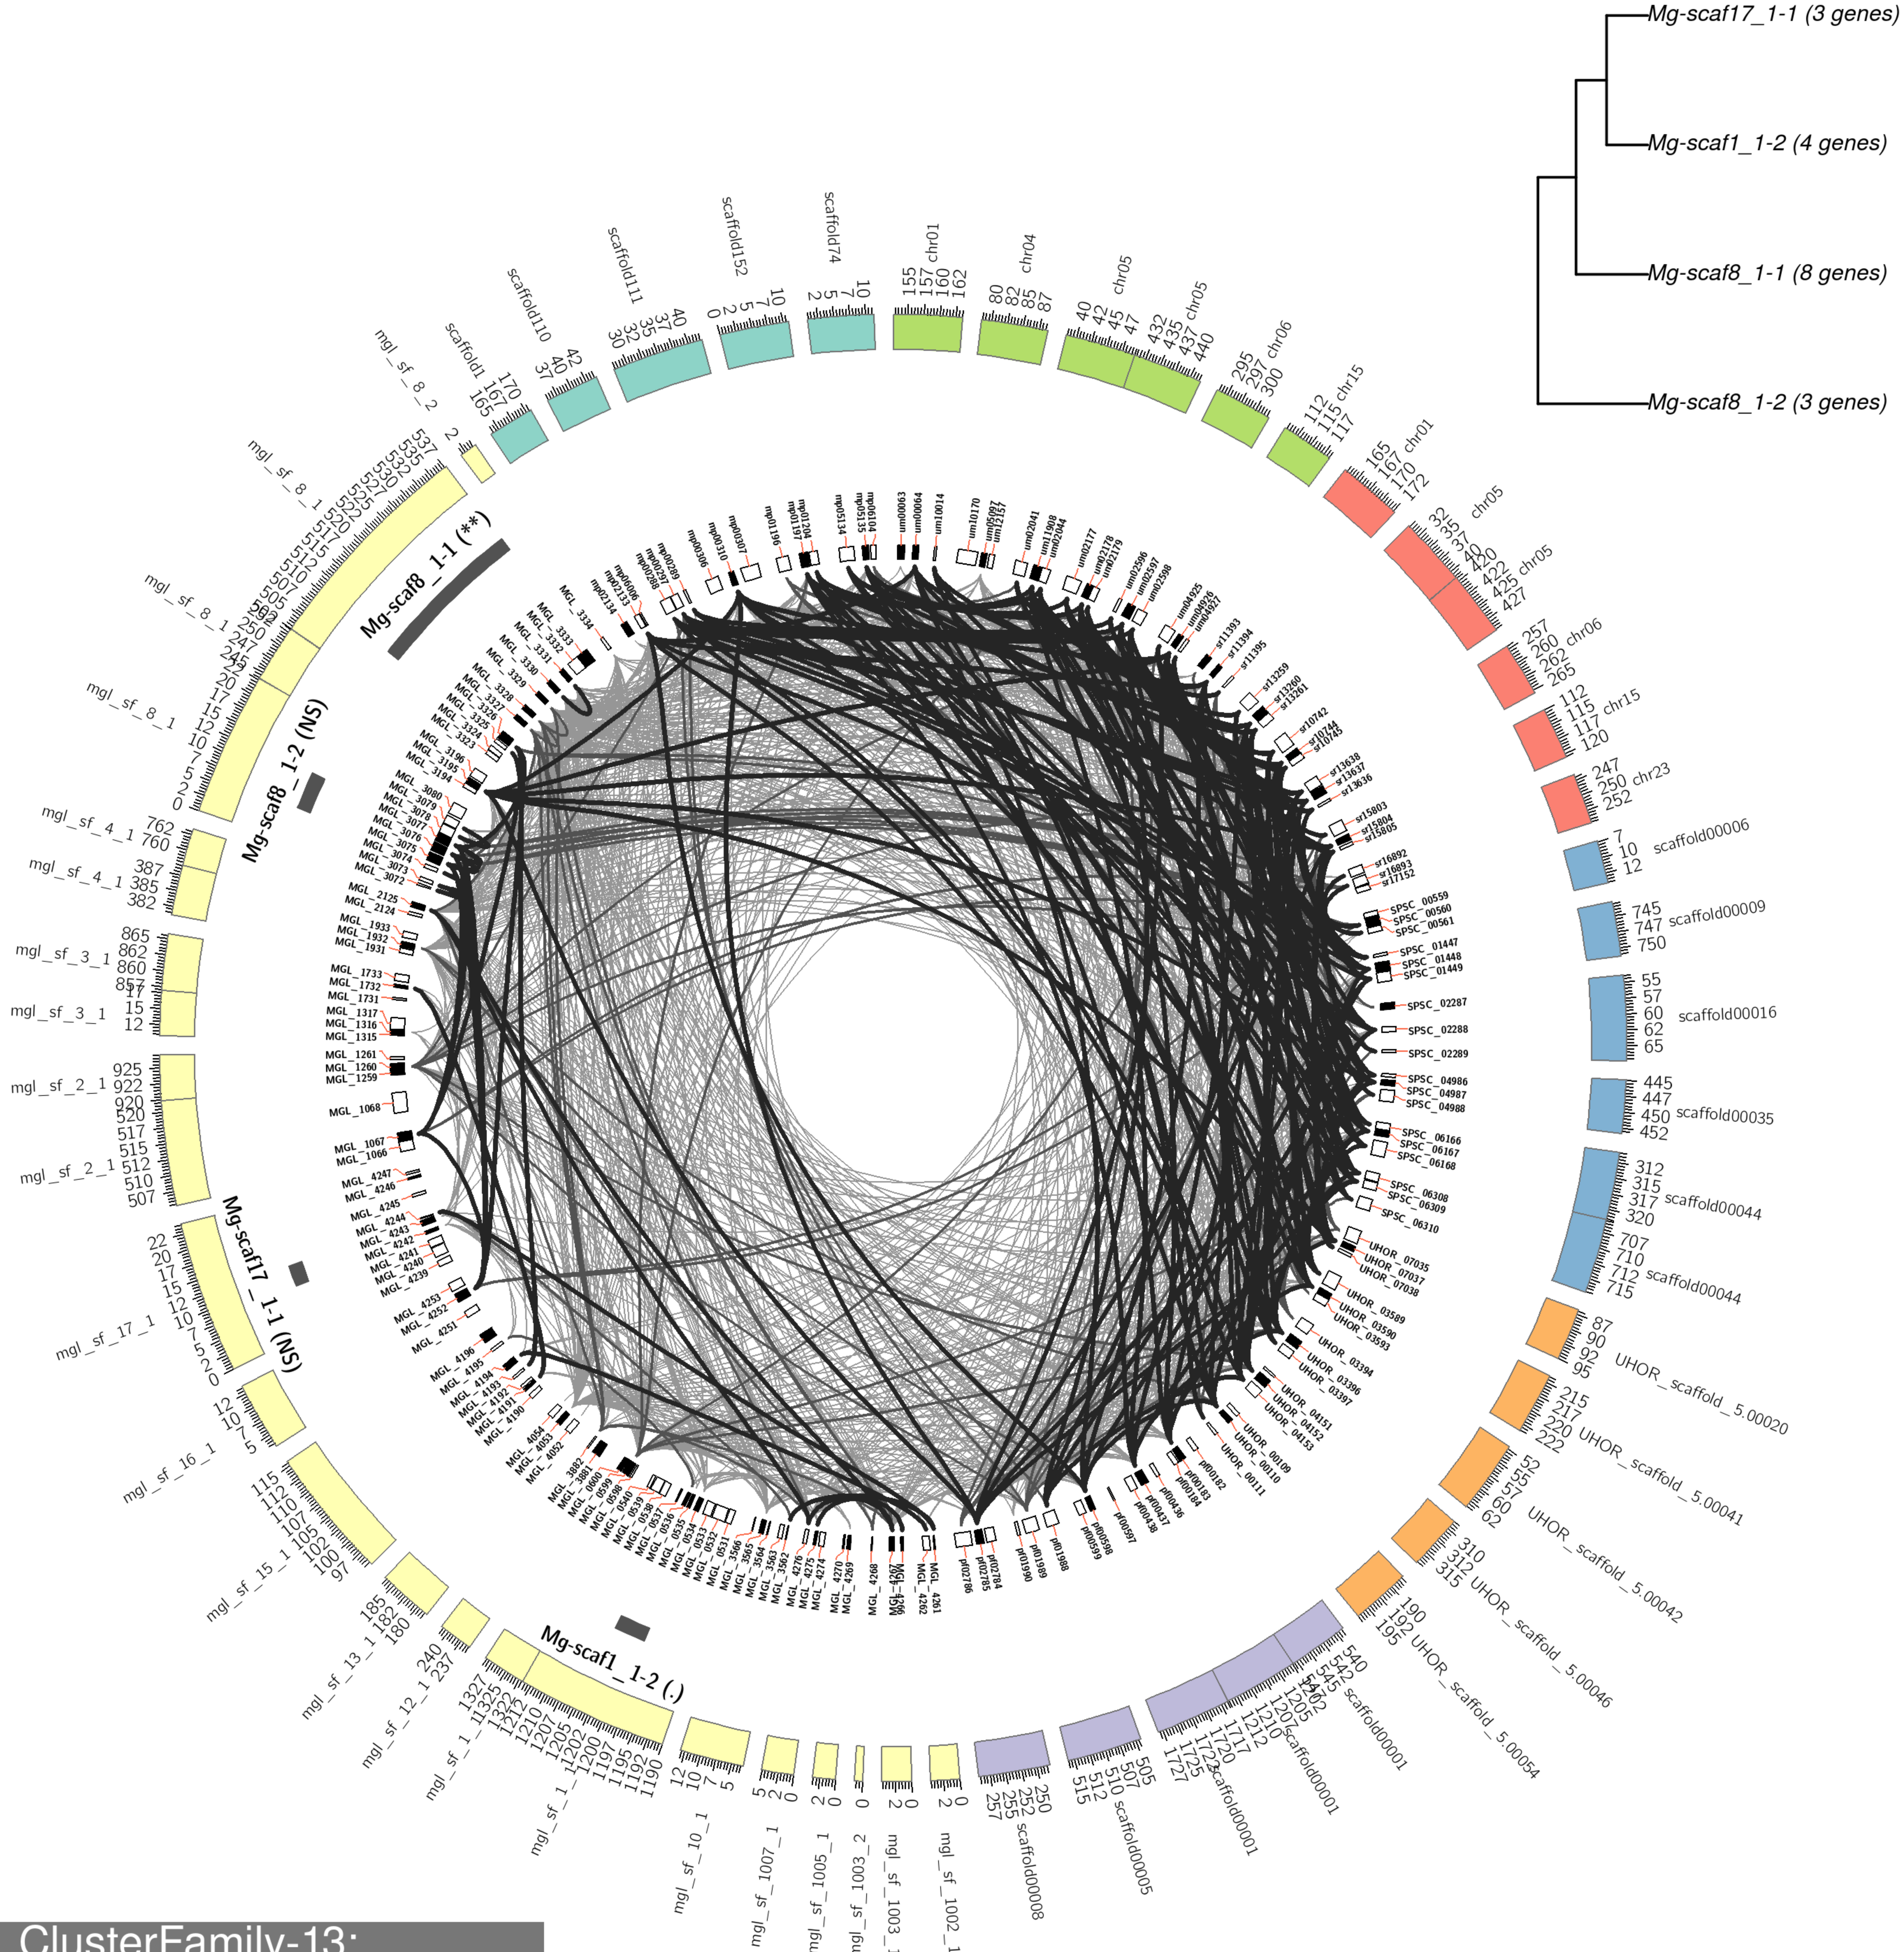

## ClusterFamily-13:

Include single genes = yes

Flanking genes (clusters) = 3

Flanking genes (single genes) = 1

N)

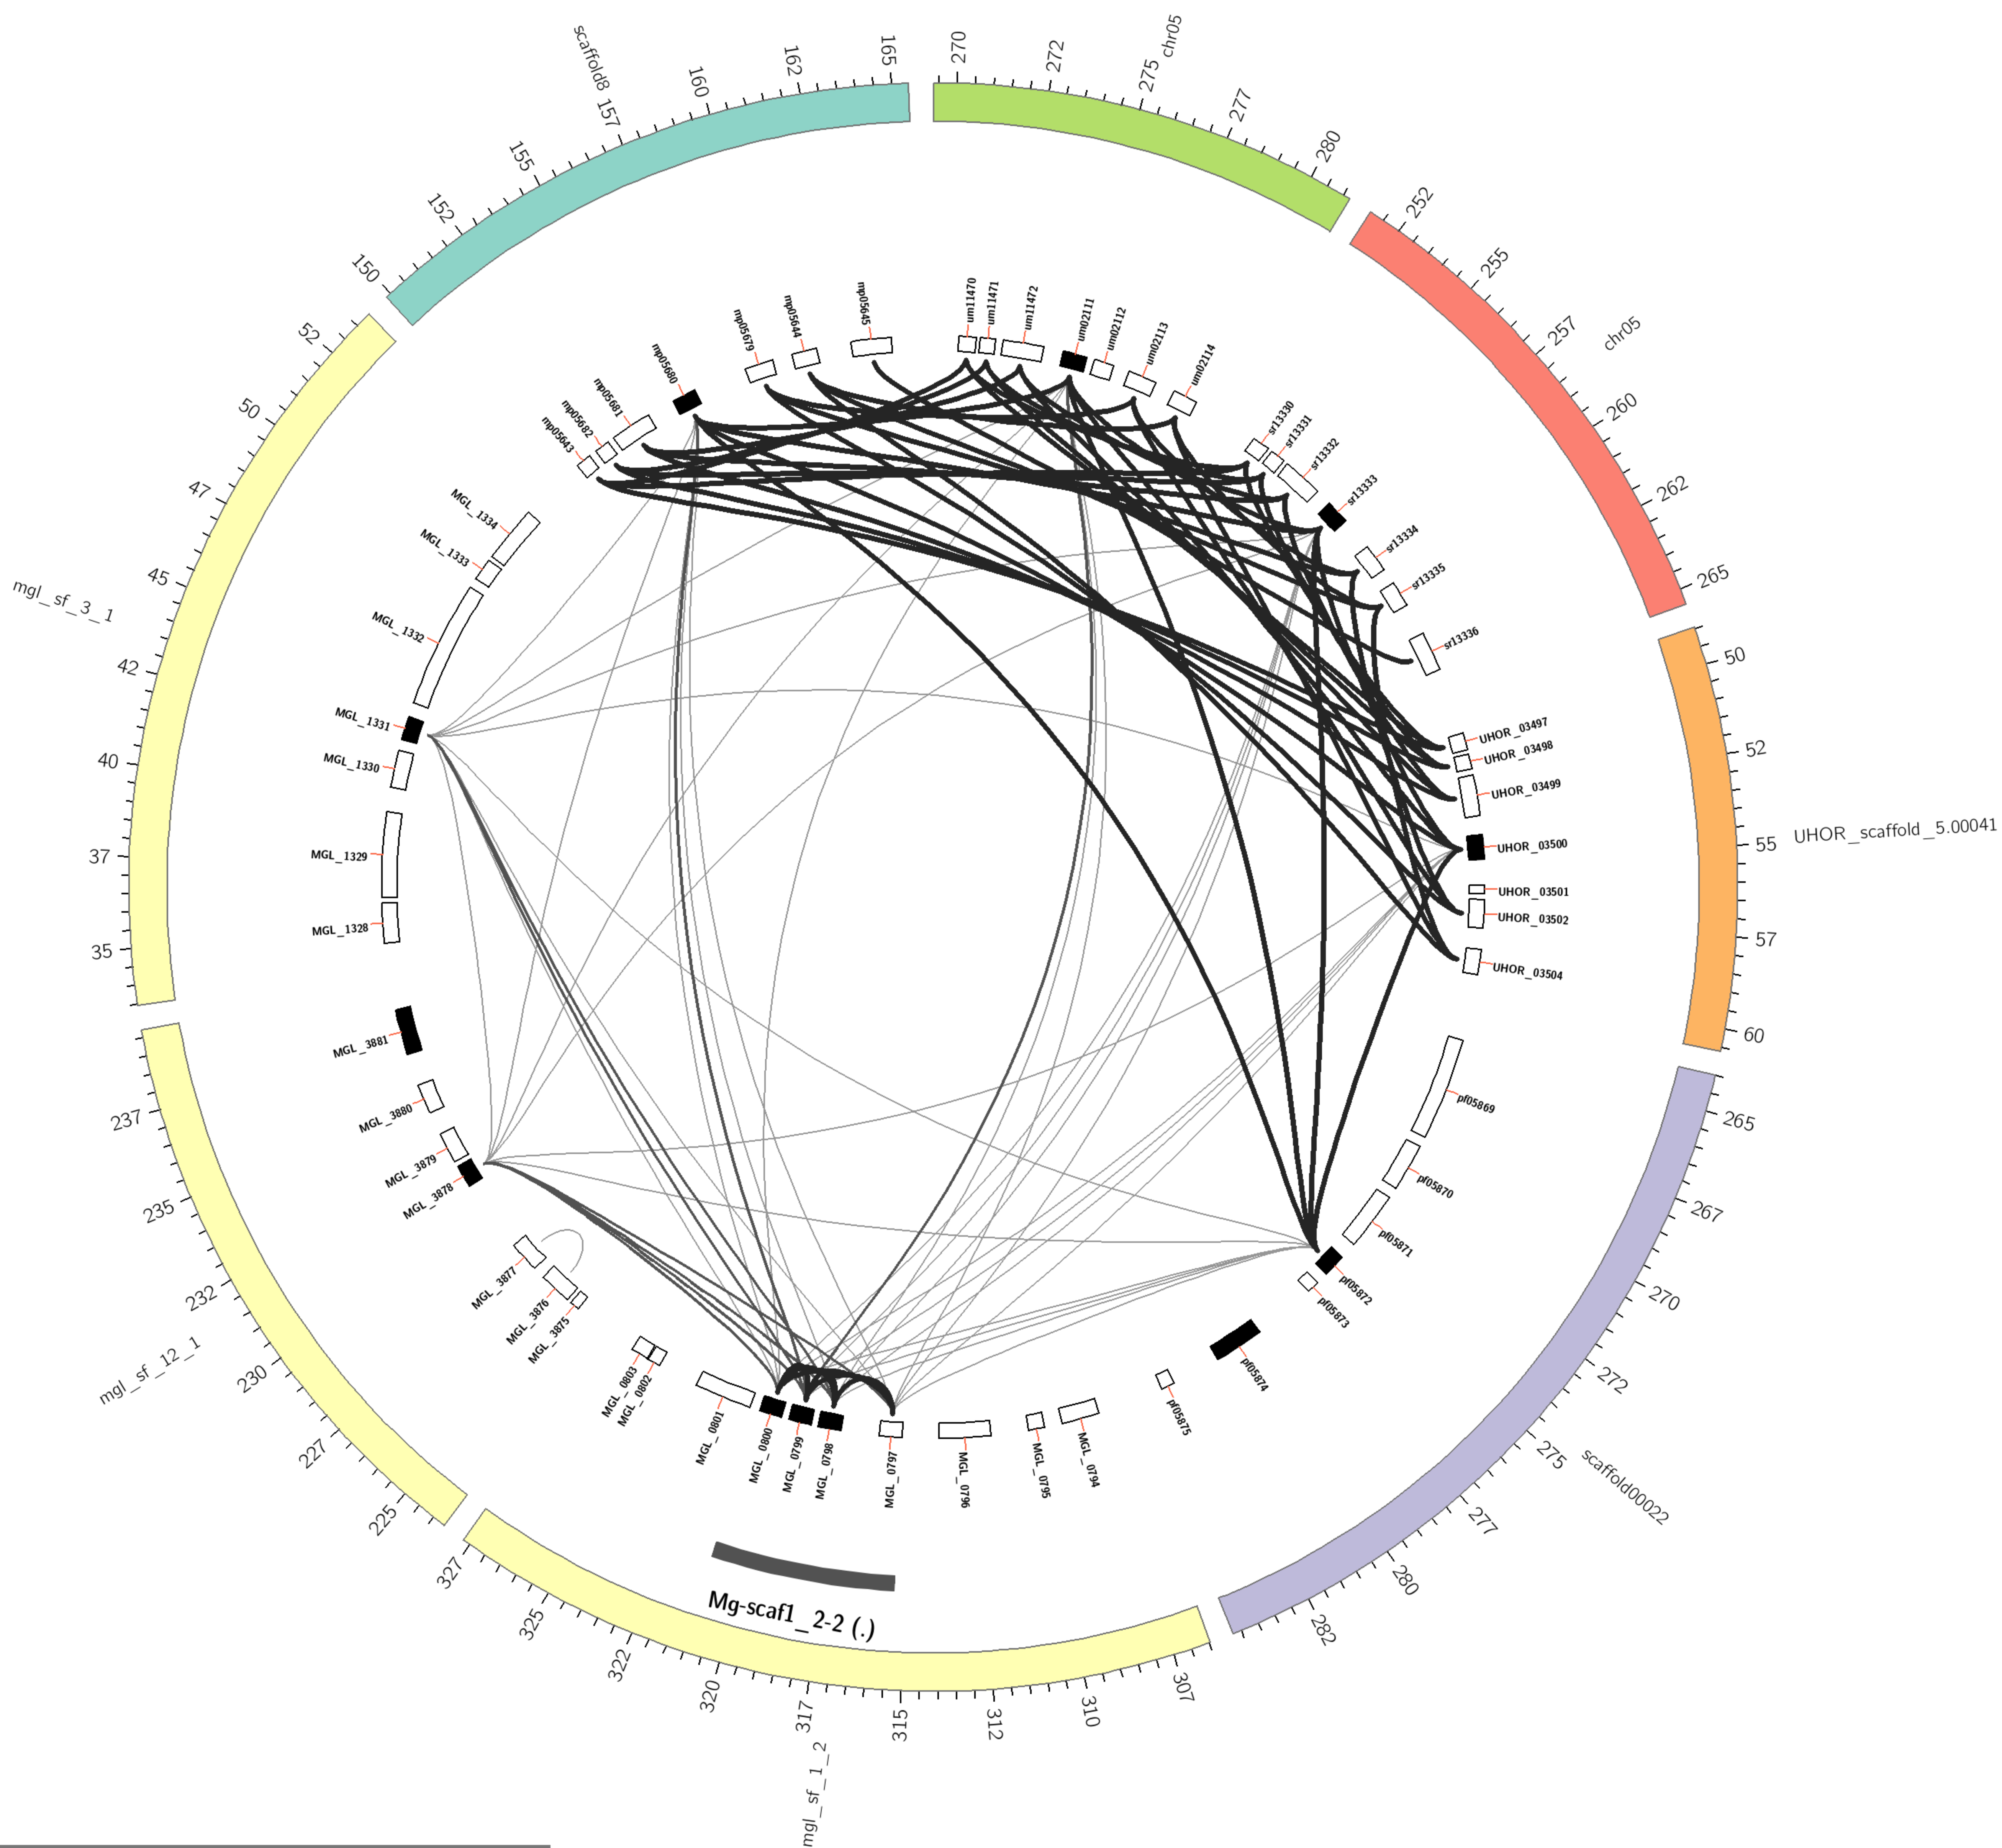

ClusterFamily-14:  
Include single genes = yes  
Flanking genes (clusters) = 3  
Flanking genes (single genes) = 3

O)

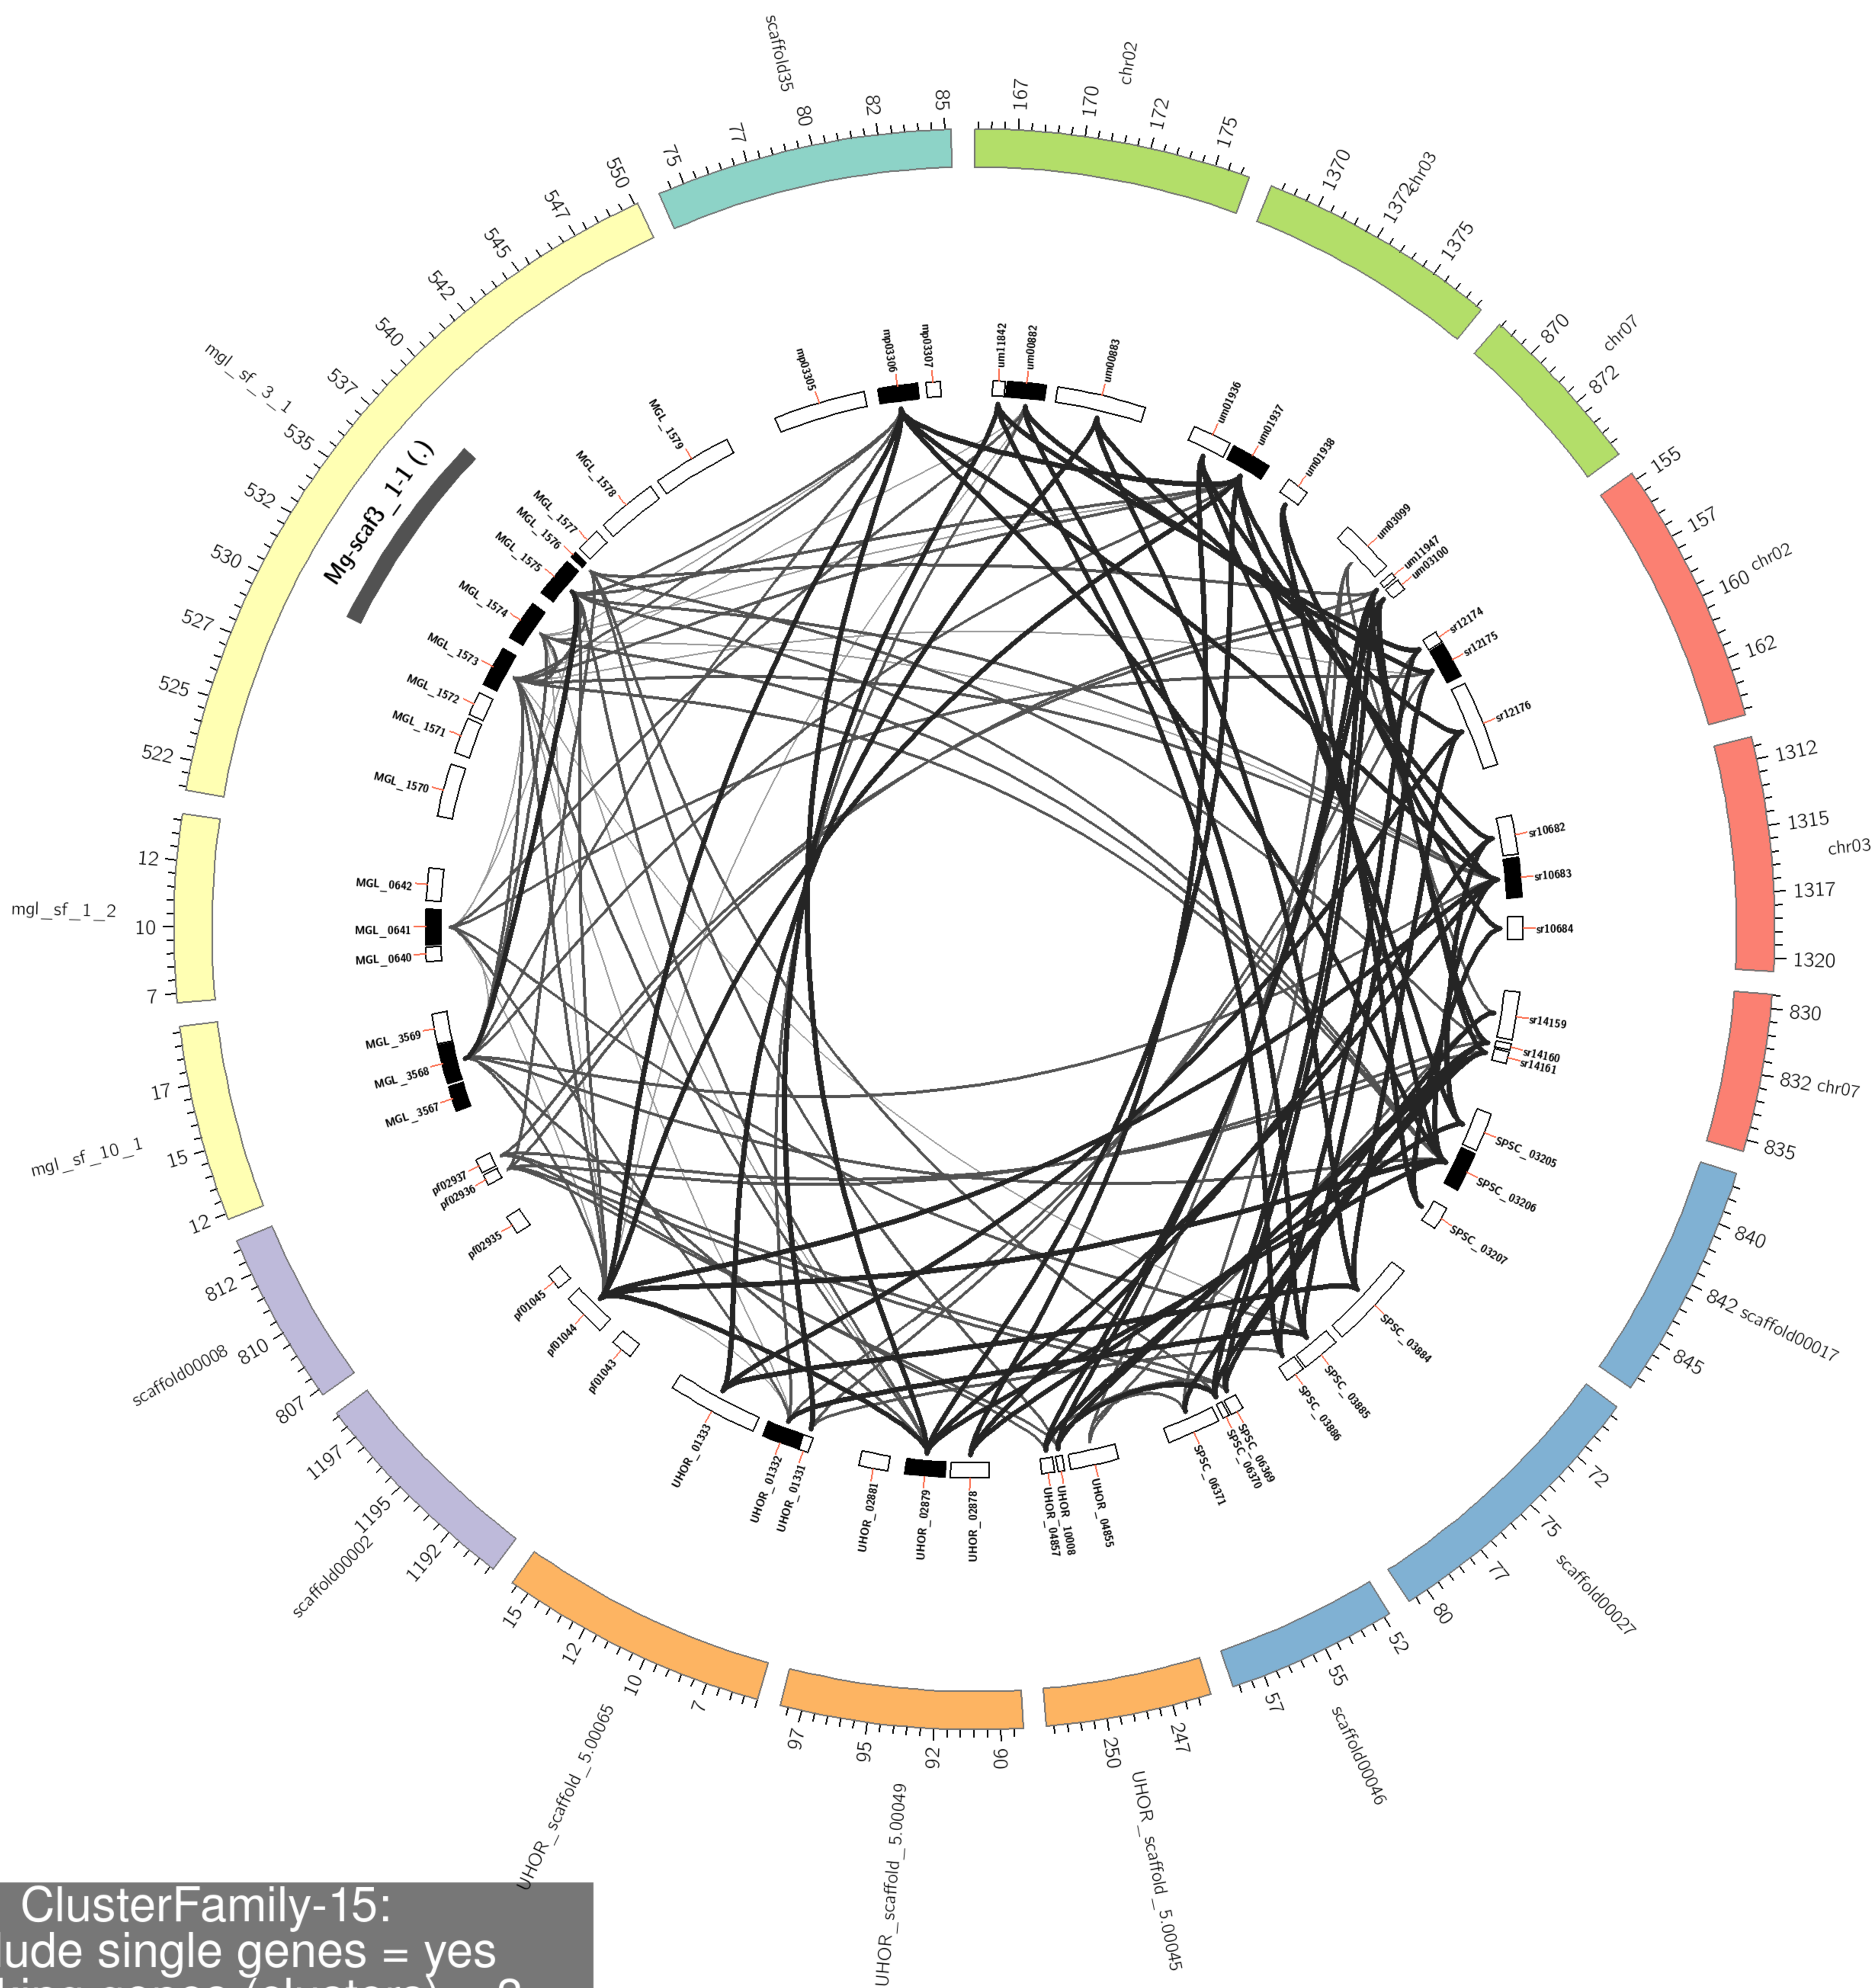

ClusterFamily-15:  
Include single genes = yes  
Flanking genes (clusters) = 3  
Flanking genes (single genes) = 1
