# Supplementary material for: A Tale of Genome Compartmentalization: The Evolution of Virulence Clusters in Smut Fungi
Source: Oxford University Press journal article supplement (doi:10.1093/gbe/evw026), 2016-02-12
Supplement: evw026_Supplementary_Data.zip [file evw026_Supplementary_Data.zip › TableS1.xlsx]

## Sheet: Sheet1
GO.ID	Term	Annotated	Significant	Expected	classicFisher	Ontology
GO:0044237	cellular metabolic process	1824	841	688.12	< 1e-30	BP
GO:0006412	translation	240	186	90.54	< 1e-30	BP
GO:0009058	biosynthetic process	982	496	370.47	1.1e-19	BP
GO:0044711	single-organism biosynthetic process	302	196	113.93	1.5e-18	BP
GO:0071704	organic substance metabolic process	1985	870	748.86	3.9e-18	BP
GO:0044267	cellular protein metabolic process	592	328	223.34	2.3e-16	BP
GO:0044281	small molecule metabolic process	505	283	190.52	2.4e-16	BP
GO:0044238	primary metabolic process	1896	834	715.29	3.5e-16	BP
GO:0034660	ncRNA metabolic process	132	88	49.8	1.6e-15	BP
GO:0009987	cellular process	2308	967	870.72	6.4e-15	BP
GO:1901566	organonitrogen compound biosynthetic process	188	134	70.92	1.1e-12	BP
GO:0010608	posttranscriptional regulation of gene expression	29	23	10.94	1e-11	BP
GO:1901564	organonitrogen compound metabolic process	438	252	165.24	3.6e-11	BP
GO:0071840	cellular component organization or biogenesis	352	190	132.8	4e-11	BP
GO:0006520	cellular amino acid metabolic process	176	116	66.4	1e-09	BP
GO:0019538	protein metabolic process	681	360	256.91	1.7e-09	BP
GO:0006082	organic acid metabolic process	244	142	92.05	2e-09	BP
GO:0006818	hydrogen transport	23	21	8.68	3.3e-09	BP
GO:0006414	translational elongation	28	26	10.56	3.3e-08	BP
GO:1902600	hydrogen ion transmembrane transport	22	20	8.3	4.8e-08	BP
GO:1901576	organic substance biosynthetic process	943	473	355.76	8e-08	BP
GO:0065008	regulation of biological quality	68	38	25.65	1e-07	BP
GO:0051649	establishment of localization in cell	152	81	57.34	3.5e-07	BP
GO:0072522	purine-containing compound biosynthetic process	39	31	14.71	4.4e-07	BP
GO:0051641	cellular localization	163	85	61.49	5.2e-07	BP
GO:0044710	single-organism metabolic process	1145	488	431.96	1.3e-06	BP
GO:0009163	nucleoside biosynthetic process	31	25	11.7	2.1e-06	BP
GO:0006367	transcription initiation from RNA polymerase II promoter	10	8	3.77	5.1e-06	BP
GO:0010467	gene expression	865	405	326.33	1.4e-05	BP
GO:0046907	intracellular transport	138	71	52.06	1.6e-05	BP
GO:0009127	purine nucleoside monophosphate biosynthetic process	28	24	10.56	2.3e-05	BP
GO:0009168	purine ribonucleoside monophosphate biosynthetic process	28	24	10.56	3.1e-05	BP
GO:0006417	regulation of translation	28	23	10.56	3.3e-05	BP
GO:1901293	nucleoside phosphate biosynthetic process	59	40	22.26	3.8e-05	BP
GO:0006270	DNA replication initiation	10	10	3.77	5.2e-05	BP
GO:0046390	ribose phosphate biosynthetic process	40	31	15.09	5.2e-05	BP
GO:0042455	ribonucleoside biosynthetic process	31	25	11.7	6.9e-05	BP
GO:0009260	ribonucleotide biosynthetic process	40	31	15.09	7.4e-05	BP
GO:0008152	metabolic process	2574	1014	971.07	7.6e-05	BP
GO:0016053	organic acid biosynthetic process	116	77	43.76	7.7e-05	BP
GO:0015672	monovalent inorganic cation transport	30	23	11.32	8.2e-05	BP
GO:0009156	ribonucleoside monophosphate biosynthetic process	34	27	12.83	8.8e-05	BP
GO:0045892	negative regulation of transcription, DNA-templated	12	9	4.53	9e-05	BP
GO:0055086	nucleobase-containing small molecule metabolic process	225	114	84.88	9.4e-05	BP
GO:0033554	cellular response to stress	127	52	47.91	0.00012	BP
GO:1902679	negative regulation of RNA biosynthetic process	12	9	4.53	0.00013	BP
GO:0044249	cellular biosynthetic process	924	466	348.59	0.00013	BP
GO:1901607	alpha-amino acid biosynthetic process	61	52	23.01	0.00013	BP
GO:0006950	response to stress	170	66	64.13	0.00013	BP
GO:0044265	cellular macromolecule catabolic process	57	38	21.5	0.00014	BP
GO:0006694	steroid biosynthetic process	12	11	4.53	0.00018	BP
GO:0016192	vesicle-mediated transport	90	48	33.95	0.00018	BP
GO:1901659	glycosyl compound biosynthetic process	31	25	11.7	0.00019	BP
GO:0070647	protein modification by small protein conjugation or removal	20	15	7.55	0.0002	BP
GO:0008202	steroid metabolic process	13	12	4.9	0.00021	BP
GO:0051656	establishment of organelle localization	11	10	4.15	0.00024	BP
GO:0009152	purine ribonucleotide biosynthetic process	35	27	13.2	0.00028	BP
GO:0006413	translational initiation	51	36	19.24	0.0003	BP
GO:0033036	macromolecule localization	170	80	64.13	0.00032	BP
GO:0046129	purine ribonucleoside biosynthetic process	26	21	9.81	0.00038	BP
GO:1902582	single-organism intracellular transport	91	46	34.33	0.00052	BP
GO:0009124	nucleoside monophosphate biosynthetic process	35	27	13.2	0.00062	BP
GO:0071826	ribonucleoprotein complex subunit organization	22	18	8.3	0.00064	BP
GO:0044085	cellular component biogenesis	177	111	66.78	0.00067	BP
GO:0006164	purine nucleotide biosynthetic process	35	27	13.2	0.0007	BP
GO:0042451	purine nucleoside biosynthetic process	26	21	9.81	0.00092	BP
GO:0009165	nucleotide biosynthetic process	58	40	21.88	0.00111	BP
GO:0006261	DNA-dependent DNA replication	17	14	6.41	0.00117	BP
GO:0045184	establishment of protein localization	153	71	57.72	0.00118	BP
GO:0051246	regulation of protein metabolic process	54	34	20.37	0.00137	BP
GO:0006807	nitrogen compound metabolic process	1134	484	427.81	0.00141	BP
GO:0071103	DNA conformation change	31	20	11.7	0.00143	BP
GO:0044283	small molecule biosynthetic process	143	96	53.95	0.00147	BP
GO:0018193	peptidyl-amino acid modification	38	22	14.34	0.00175	BP
GO:0006352	DNA-templated transcription, initiation	21	11	7.92	0.00216	BP
GO:0006754	ATP biosynthetic process	13	12	4.9	0.00217	BP
GO:0034220	ion transmembrane transport	55	25	20.75	0.00229	BP
GO:0006811	ion transport	127	55	47.91	0.0023	BP
GO:0071852	fungal-type cell wall organization or biogenesis	10	7	3.77	0.00238	BP
GO:0043604	amide biosynthetic process	13	10	4.9	0.00242	BP
GO:0016071	mRNA metabolic process	63	34	23.77	0.00264	BP
GO:0006396	RNA processing	174	98	65.64	0.00264	BP
GO:0015992	proton transport	23	21	8.68	0.00269	BP
GO:0009451	RNA modification	39	23	14.71	0.00292	BP
GO:0051128	regulation of cellular component organization	26	15	9.81	0.00311	BP
GO:0009201	ribonucleoside triphosphate biosynthetic process	18	14	6.79	0.00319	BP
GO:0051603	proteolysis involved in cellular protein catabolic process	47	30	17.73	0.00354	BP
GO:0006753	nucleoside phosphate metabolic process	208	107	78.47	0.00376	BP
GO:0033014	tetrapyrrole biosynthetic process	14	11	5.28	0.004	BP
GO:0032268	regulation of cellular protein metabolic process	50	31	18.86	0.00404	BP
GO:0071702	organic substance transport	201	87	75.83	0.00487	BP
GO:0009110	vitamin biosynthetic process	14	11	5.28	0.0053	BP
GO:0019637	organophosphate metabolic process	274	140	103.37	0.00549	BP
GO:0008652	cellular amino acid biosynthetic process	85	65	32.07	0.00577	BP
GO:0090501	RNA phosphodiester bond hydrolysis	10	8	3.77	0.00584	BP
GO:0009057	macromolecule catabolic process	81	45	30.56	0.00738	BP
GO:0033043	regulation of organelle organization	22	12	8.3	0.00868	BP
GO:1901657	glycosyl compound metabolic process	164	82	61.87	0.00966	BP
GO:0044763	single-organism cellular process	1284	533	484.4	0.01056	BP
GO:1901605	alpha-amino acid metabolic process	93	69	35.09	0.01079	BP
GO:0016226	iron-sulfur cluster assembly	10	9	3.77	0.01134	BP
GO:0009145	purine nucleoside triphosphate biosynthetic process	16	12	6.04	0.01153	BP
GO:0022613	ribonucleoprotein complex biogenesis	101	71	38.1	0.01233	BP
GO:0009206	purine ribonucleoside triphosphate biosynthetic process	16	12	6.04	0.01237	BP
GO:0051640	organelle localization	13	11	4.9	0.01332	BP
GO:0090407	organophosphate biosynthetic process	106	63	39.99	0.01437	BP
GO:0050790	regulation of catalytic activity	61	23	23.01	0.01459	BP
GO:0016458	gene silencing	10	8	3.77	0.01545	BP
GO:0042440	pigment metabolic process	15	11	5.66	0.01558	BP
GO:0051253	negative regulation of RNA metabolic process	13	9	4.9	0.01683	BP
GO:0046394	carboxylic acid biosynthetic process	116	77	43.76	0.01736	BP
GO:0033013	tetrapyrrole metabolic process	15	11	5.66	0.01748	BP
GO:0000725	recombinational repair	11	8	4.15	0.01872	BP
GO:0044106	cellular amine metabolic process	14	10	5.28	0.02447	BP
GO:0051186	cofactor metabolic process	82	47	30.94	0.02454	BP
GO:0009142	nucleoside triphosphate biosynthetic process	19	14	7.17	0.0266	BP
GO:0019693	ribose phosphate metabolic process	163	82	61.49	0.02758	BP
GO:0045934	negative regulation of nucleobase-containing compound metabolic process	15	10	5.66	0.02891	BP
GO:0051172	negative regulation of nitrogen compound metabolic process	16	11	6.04	0.03023	BP
GO:0072521	purine-containing compound metabolic process	170	85	64.13	0.03047	BP
GO:0016051	carbohydrate biosynthetic process	24	17	9.05	0.03177	BP
GO:0044272	sulfur compound biosynthetic process	24	17	9.05	0.03214	BP
GO:0015980	energy derivation by oxidation of organic compounds	35	19	13.2	0.03233	BP
GO:0031163	metallo-sulfur cluster assembly	10	9	3.77	0.03276	BP
GO:1902578	single-organism localization	28	16	10.56	0.03446	BP
GO:0046903	secretion	11	7	4.15	0.03464	BP
GO:0044723	single-organism carbohydrate metabolic process	93	46	35.09	0.03471	BP
GO:0043038	amino acid activation	35	28	13.2	0.03572	BP
GO:0022414	reproductive process	18	11	6.79	0.03722	BP
GO:0022618	ribonucleoprotein complex assembly	22	18	8.3	0.03775	BP
GO:0015031	protein transport	149	70	56.21	0.03882	BP
GO:0001731	formation of translation preinitiation complex	13	12	4.9	0.03948	BP
GO:0022900	electron transport chain	12	8	4.53	0.03972	BP
GO:0044702	single organism reproductive process	12	8	4.53	0.03978	BP
GO:0006302	double-strand break repair	14	9	5.28	0.04021	BP
GO:0043039	tRNA aminoacylation	35	28	13.2	0.04498	BP
GO:0010557	positive regulation of macromolecule biosynthetic process	11	8	4.15	0.04513	BP
GO:0042558	pteridine-containing compound metabolic process	11	8	4.15	0.04665	BP
GO:0009056	catabolic process	317	139	119.59	0.04777	BP
GO:0000003	reproduction	25	14	9.43	0.04788	BP
GO:0044772	mitotic cell cycle phase transition	11	8	4.15	0.04989	BP
GO:0005198	structural molecule activity	147	111	52.58	1.1e-23	MF
GO:0003723	RNA binding	226	139	80.84	6.8e-18	MF
GO:0043168	anion binding	761	333	272.21	9.2e-11	MF
GO:0016817	hydrolase activity, acting on acid anhydrides	276	139	98.72	1.5e-09	MF
GO:0051540	metal cluster binding	37	31	13.23	4.2e-09	MF
GO:0097367	carbohydrate derivative binding	587	270	209.97	3.1e-08	MF
GO:0036094	small molecule binding	807	353	288.66	7.8e-08	MF
GO:0001882	nucleoside binding	563	263	201.38	3.5e-06	MF
GO:0016651	oxidoreductase activity, acting on NAD(P)H	24	18	8.58	4e-06	MF
GO:0016875	ligase activity, forming carbon-oxygen bonds	34	28	12.16	1.4e-05	MF
GO:1901265	nucleoside phosphate binding	790	345	282.58	9.3e-05	MF
GO:1901363	heterocyclic compound binding	1387	546	496.12	0.00018	MF
GO:0097159	organic cyclic compound binding	1390	547	497.2	0.00018	MF
GO:0016740	transferase activity	625	268	223.56	0.00024	MF
GO:0004175	endopeptidase activity	55	33	19.67	0.00047	MF
GO:0016874	ligase activity	134	68	47.93	0.00058	MF
GO:0008135	translation factor activity, nucleic acid binding	69	53	24.68	0.00117	MF
GO:0017076	purine nucleotide binding	568	267	203.17	0.00153	MF
GO:0003735	structural constituent of ribosome	124	100	44.35	0.00165	MF
GO:0044769	ATPase activity, coupled to transmembrane movement of ions, rotational mechanism	13	12	4.65	0.00196	MF
GO:0015078	hydrogen ion transmembrane transporter activity	42	29	15.02	0.00221	MF
GO:0035639	purine ribonucleoside triphosphate binding	558	261	199.59	0.00327	MF
GO:0016853	isomerase activity	81	42	28.97	0.00398	MF
GO:0015075	ion transmembrane transporter activity	132	57	47.22	0.00427	MF
GO:0016763	transferase activity, transferring pentosyl groups	13	10	4.65	0.00451	MF
GO:0042625	ATPase activity, coupled to transmembrane movement of ions	32	19	11.45	0.00978	MF
GO:0036442	hydrogen-exporting ATPase activity	11	10	3.93	0.00989	MF
GO:0032553	ribonucleotide binding	580	267	207.46	0.01376	MF
GO:0016860	intramolecular oxidoreductase activity	15	12	5.37	0.015	MF
GO:0016667	oxidoreductase activity, acting on a sulfur group of donors	25	13	8.94	0.01514	MF
GO:0008173	RNA methyltransferase activity	10	8	3.58	0.01774	MF
GO:0003824	catalytic activity	2249	833	804.46	0.01909	MF
GO:0022892	substrate-specific transporter activity	172	70	61.52	0.02042	MF
GO:0022890	inorganic cation transmembrane transporter activity	69	37	24.68	0.02092	MF
GO:0070003	threonine-type peptidase activity	14	10	5.01	0.02421	MF
GO:0016645	oxidoreductase activity, acting on the CH-NH group of donors	14	8	5.01	0.02961	MF
GO:0005524	ATP binding	470	228	168.12	0.03047	MF
GO:0070011	peptidase activity, acting on L-amino acid peptides	113	49	40.42	0.03101	MF
GO:0030554	adenyl nucleotide binding	480	234	171.69	0.0333	MF
GO:0043566	structure-specific DNA binding	19	9	6.8	0.03723	MF
GO:0005506	iron ion binding	60	19	21.46	0.0436	MF
GO:0003746	translation elongation factor activity	17	16	6.08	0.04524	MF
GO:0005737	cytoplasm	789	493	347.18	2.1e-21	CC
GO:0044464	cell part	1463	729	643.75	8.4e-20	CC
GO:0005623	cell	1463	729	643.75	8.4e-20	CC
GO:0032991	macromolecular complex	622	352	273.69	1.5e-14	CC
GO:0044444	cytoplasmic part	555	350	244.21	1e-12	CC
GO:0030529	ribonucleoprotein complex	241	172	106.04	2.5e-12	CC
GO:0044424	intracellular part	1383	712	608.55	6.3e-08	CC
GO:0005840	ribosome	147	114	64.68	9e-08	CC
GO:0016469	proton-transporting two-sector ATPase complex	22	20	9.68	3.7e-07	CC
GO:0031090	organelle membrane	181	102	79.64	4e-07	CC
GO:0043226	organelle	1096	536	482.26	5e-07	CC
GO:0043228	non-membrane-bounded organelle	339	203	149.17	7.6e-07	CC
GO:0043232	intracellular non-membrane-bounded organelle	339	203	149.17	7.6e-07	CC
GO:0044422	organelle part	506	259	222.65	0.0001	CC
GO:0005622	intracellular	1444	727	635.39	0.00036	CC
GO:0033178	proton-transporting two-sector ATPase complex, catalytic domain	11	10	4.84	0.00049	CC
GO:0005739	mitochondrion	172	106	75.68	0.001	CC
GO:0033177	proton-transporting two-sector ATPase complex, proton-transporting domain	10	9	4.4	0.00118	CC
GO:0045259	proton-transporting ATP synthase complex	10	10	4.4	0.00128	CC
GO:0031974	membrane-enclosed lumen	157	87	69.08	0.00182	CC
GO:0044391	ribosomal subunit	29	24	12.76	0.0022	CC
GO:1990204	oxidoreductase complex	12	11	5.28	0.00295	CC
GO:0005759	mitochondrial matrix	26	21	11.44	0.00384	CC
GO:0005852	eukaryotic translation initiation factor 3 complex	13	12	5.72	0.00642	CC
GO:0005743	mitochondrial inner membrane	45	30	19.8	0.0088	CC
GO:0098589	membrane region	53	27	23.32	0.00987	CC
GO:0070993	translation preinitiation complex	13	12	5.72	0.01805	CC
GO:0070469	respiratory chain	10	7	4.4	0.01896	CC
GO:0005730	nucleolus	52	36	22.88	0.02416	CC
GO:0030120	vesicle coat	10	8	4.4	0.02426	CC
GO:0030135	coated vesicle	16	13	7.04	0.02436	CC
GO:1902494	catalytic complex	89	52	39.16	0.03395	CC
GO:0019866	organelle inner membrane	46	30	20.24	0.03965	CC
GO:0005829	cytosol	39	30	17.16	0.04267	CC
GO:0016023	cytoplasmic membrane-bounded vesicle	27	17	11.88	0.04753	CC
