# Supplementary material for: A Tale of Genome Compartmentalization: The Evolution of Virulence Clusters in Smut Fungi
Source: Oxford University Press journal article supplement (doi:10.1093/gbe/evw026), 2016-02-12
Supplement: evw026_Supplementary_Data.zip [file evw026_Supplementary_Data.zip › TableS2.xlsx]

## Sheet: S. scitamineum
Name	Chr	Begin	End	Strand	Secreted	D	Length	Location	Score	CSEP relaxed	CSEP strict
SPSC_00001	scaffold00001	3924	4751	-1	no	0.105	275	Nuclear	7	no	no
SPSC_00002	scaffold00001	14055	15384	-1	no	0.166	314	Cytoplasmic	4.1	no	no
SPSC_00003	scaffold00001	17852	19150	-1	no	0.119	432	Nuclear	6.6	no	no
SPSC_00004	scaffold00001	19813	21156	1	no	0.123	447	Membrane bound Golgi	8.2	no	no
SPSC_00005	scaffold00001	22199	25237	-1	no	0.123	1012	Plasma membrane	3.4	no	no
SPSC_00006	scaffold00001	25890	26537	1	no	0.435	215	Plasma membrane	6.7	no	no
SPSC_00007	scaffold00001	31737	32722	1	no	0.118	298	Nuclear	4.5	no	no
SPSC_00008	scaffold00001	35111	36312	1	no	0.114	306	Membrane bound Mitochondrial	2.9	no	no
SPSC_00009	scaffold00001	41050	44672	-1	no	0.102	1014	Nuclear	4.3	no	no
SPSC_00010	scaffold00001	45095	47966	1	no	0.105	529	Membrane bound Mitochondrial	2.2	no	no
SPSC_00011	scaffold00001	48576	51639	-1	no	0.112	982	Nuclear	2.6	no	no
SPSC_00012	scaffold00001	53252	56536	1	no	0.125	1094	Cytoplasmic	3.3	no	no
SPSC_00013	scaffold00001	59890	60363	-1	no	0.126	157	Membrane bound Extracellular (Secreted)	5.4	no	no
SPSC_00014	scaffold00001	62409	65765	1	no	0.113	1118	Cytoplasmic	2.9	no	no
SPSC_00015	scaffold00002	571	1767	1	no	0.198	398	Nuclear	4.3	no	no
SPSC_00016	scaffold00002	2007	4811	-1	no	0.097	934	Nuclear	2.7	no	no
SPSC_00017	scaffold00002	11507	12133	1	no	0.266	208	Membrane bound Golgi	8.7	no	no
SPSC_00018	scaffold00002	14378	17902	1	no	0.122	1174	Cytoplasmic	4.6	no	no
SPSC_00019	scaffold00002	18441	24056	-1	no	0.116	1785	Nuclear	10	no	no
SPSC_00020	scaffold00002	25669	28236	1	no	0.16	855	Nuclear	6.9	no	no
SPSC_00021	scaffold00002	29013	34769	1	no	0.13	1918	Plasma membrane	8.3	no	no
SPSC_00022	scaffold00002	36738	38303	1	yes	0.574	521	Membrane bound Extracellular (Secreted)	4	yes	yes
SPSC_00023	scaffold00002	39001	41396	1	no	0.121	781	Nuclear	4.4	no	no
SPSC_00024	scaffold00002	41615	43483	-1	no	0.114	622	Cytoplasmic	4.2	no	no
SPSC_00025	scaffold00002	44212	46692	1	no	0.169	826	Membrane bound Peroxisomal	9.7	no	no
SPSC_00026	scaffold00002	47444	50656	1	no	0.126	1070	Cytoplasmic	3.5	no	no
SPSC_00027	scaffold00002	51026	51544	-1	no	0.134	76	Membrane bound Mitochondrial	4.9	no	no
SPSC_00028	scaffold00002	53749	55082	1	no	0.114	411	Membrane bound Mitochondrial	9.9	no	no
SPSC_00029	scaffold00002	55359	59504	-1	no	0.111	1381	Cytoplasmic	5.3	no	no
SPSC_00030	scaffold00002	59998	61629	1	no	0.123	543	Membrane bound Mitochondrial	7.3	no	no
SPSC_00031	scaffold00002	62640	63956	1	no	0.13	438	Cytoplasmic	9.6	no	no
SPSC_00032	scaffold00002	67937	74800	1	no	0.101	2167	Nuclear	5.6	no	no
SPSC_00033	scaffold00002	76479	78218	-1	no	0.1	579	Plasma membrane	5	no	no
SPSC_00034	scaffold00002	80409	83846	1	no	0.108	1145	Nuclear	2.6	no	no
SPSC_00035	scaffold00002	84989	87928	1	no	0.1	979	Plasma membrane	2.8	no	no
SPSC_00036	scaffold00002	88673	90839	1	no	0.11	391	Cytoplasmic	9.9	no	no
SPSC_00037	scaffold00002	91487	92666	1	no	0.14	171	Membrane bound Mitochondrial	7.9	no	no
SPSC_00038	scaffold00002	93174	94706	1	no	0.101	510	Nuclear	8.6	no	no
SPSC_00039	scaffold00002	94852	98028	-1	no	0.101	1058	Nuclear	5.8	no	no
SPSC_00040	scaffold00002	98932	102171	1	no	0.127	1079	Cytoplasmic	4.1	no	no
SPSC_00041	scaffold00002	106872	107861	1	no	0.134	329	Membrane bound Extracellular (Secreted)	8.8	no	no
SPSC_00042	scaffold00002	108811	113073	1	no	0.304	1420	Plasma membrane	6.9	no	no
SPSC_00043	scaffold00002	113558	114814	1	no	0.115	418	Membrane bound Mitochondrial	4.7	no	no
SPSC_00044	scaffold00002	115667	118225	1	no	0.123	852	Membrane bound Mitochondrial	6.9	no	no
SPSC_00045	scaffold00002	118635	119633	1	no	0.101	332	Cytoplasmic	3	no	no
SPSC_00046	scaffold00002	121947	126179	1	no	0.131	1410	Plasma membrane	3.2	no	no
SPSC_00047	scaffold00002	126605	129775	-1	no	0.103	1056	Plasma membrane	7.4	no	no
SPSC_00048	scaffold00002	130553	132709	-1	no	0.107	718	Nuclear	6.1	no	no
SPSC_00049	scaffold00002	135227	136669	-1	no	0.126	480	Membrane bound Mitochondrial	9.7	no	no
SPSC_00050	scaffold00002	137845	138409	-1	no	0.1	159	Cytoplasmic	6.1	no	no
SPSC_00051	scaffold00002	139739	141096	1	no	0.225	240	Membrane bound Mitochondrial	10	no	no
SPSC_00052	scaffold00002	141386	142063	-1	no	0.1	225	Cytoplasmic	2.9	no	no
SPSC_00053	scaffold00002	142574	143911	1	no	0.106	445	Nuclear	4.8	no	no
SPSC_00054	scaffold00002	144094	145743	-1	no	0.11	549	Nuclear	6.7	no	no
SPSC_00055	scaffold00002	146124	147662	1	no	0.104	512	Nuclear	9.3	no	no
SPSC_00056	scaffold00002	148160	148822	-1	no	0.106	220	Cytoplasmic	6.4	no	no
SPSC_00057	scaffold00002	149363	150151	1	no	0.128	262	Mitochondrial	5.6	no	no
SPSC_00058	scaffold00002	150334	155286	-1	no	0.109	1650	Endoplasmic reticulum	4.5	no	no
SPSC_00059	scaffold00002	156239	157996	1	no	0.102	585	Nuclear	8.9	no	no
SPSC_00060	scaffold00002	158225	159164	-1	no	0.177	288	Mitochondrial	3.9	no	no
SPSC_00061	scaffold00002	159553	163483	1	no	0.304	1263	Cytoplasmic	6.2	no	no
SPSC_00062	scaffold00002	163669	165084	-1	no	0.132	471	Extracellular (Secreted)	5.2	yes	no
SPSC_00063	scaffold00002	165623	168013	-1	no	0.114	796	Cytoplasmic	8.9	no	no
SPSC_00064	scaffold00002	169404	170467	1	no	0.099	298	Cytoplasmic	9.2	no	no
SPSC_00065	scaffold00002	170708	172309	-1	yes	0.932	533	Membrane bound Endoplasmic reticulum	7.1	yes	yes
SPSC_00066	scaffold00002	172633	173637	-1	no	0.145	334	Membrane bound Mitochondrial	9.1	no	no
SPSC_00067	scaffold00002	174172	178083	1	no	0.107	1303	Membrane bound Vacuolar	7.5	no	no
SPSC_00068	scaffold00002	178541	180922	1	no	0.124	793	Membrane bound Endoplasmic reticulum	5.8	no	no
SPSC_00069	scaffold00002	182212	182970	1	no	0.176	252	Membrane bound Mitochondrial	6.9	no	no
SPSC_00070	scaffold00002	183694	184284	1	yes	0.847	196	Plasma membrane	3	yes	yes
SPSC_00071	scaffold00002	185520	186203	1	yes	0.755	227	Membrane bound Extracellular (Secreted)	7	yes	yes
SPSC_00072	scaffold00002	186542	187204	1	no	0.199	220	Membrane bound Extracellular (Secreted)	6.7	no	no
SPSC_00073	scaffold00002	187709	188191	1	yes	0.664	160	Extracellular (Secreted)	8.6	yes	yes
SPSC_00074	scaffold00002	189147	189758	1	yes	0.567	203	Extracellular (Secreted)	2.6	yes	yes
SPSC_00075	scaffold00002	190400	190978	1	yes	0.785	192	Extracellular (Secreted)	6.2	yes	yes
SPSC_00076	scaffold00002	191568	192104	1	yes	0.513	178	Membrane bound Extracellular (Secreted)	6	yes	yes
SPSC_00077	scaffold00002	192737	193351	1	yes	0.694	204	Extracellular (Secreted)	6.3	yes	yes
SPSC_00078	scaffold00002	193947	194561	1	yes	0.632	204	Extracellular (Secreted)	3.9	yes	yes
SPSC_00079	scaffold00002	195277	195885	1	yes	0.857	202	Plasma membrane	3.8	yes	yes
SPSC_10005	scaffold00002	196741	197070	-1	yes	0.915	109	Plasma membrane	4.6	yes	yes
SPSC_10006	scaffold00002	197748	198521	-1	yes	0.903	129	Extracellular (Secreted)	7.8	yes	yes
SPSC_10007	scaffold00002	199605	200062	-1	yes	0.914	123	Mitochondrial	4	yes	yes
SPSC_10008	scaffold00002	200983	201369	-1	yes	0.841	101	Extracellular (Secreted)	6.8	yes	yes
SPSC_00080	scaffold00002	202823	203509	1	yes	0.708	228	Membrane bound Extracellular (Secreted)	3.3	yes	yes
SPSC_00081	scaffold00002	204109	204762	1	no	0.283	217	Extracellular (Secreted)	6.7	yes	no
SPSC_00082	scaffold00002	205392	206126	1	yes	0.665	244	Extracellular (Secreted)	3.1	yes	yes
SPSC_00083	scaffold00002	206881	207432	1	yes	0.876	183	Extracellular (Secreted)	2.7	yes	yes
SPSC_00084	scaffold00002	208771	209394	1	yes	0.783	207	Extracellular (Secreted)	4.7	yes	yes
SPSC_00085	scaffold00002	209722	210312	1	yes	0.666	196	Extracellular (Secreted)	5.9	yes	yes
SPSC_00086	scaffold00002	210729	211478	1	yes	0.569	249	Extracellular (Secreted)	3.1	yes	yes
SPSC_00087	scaffold00002	212581	213162	1	yes	0.688	193	Extracellular (Secreted)	8.3	yes	yes
SPSC_00088	scaffold00002	214958	215794	1	yes	0.749	278	Extracellular (Secreted)	8.2	yes	yes
SPSC_00089	scaffold00002	215990	216894	-1	yes	0.888	272	Extracellular (Secreted)	7.5	yes	yes
SPSC_00090	scaffold00002	217460	218098	1	yes	0.775	212	Membrane bound Extracellular (Secreted)	4.1	yes	yes
SPSC_00091	scaffold00002	220364	221077	1	yes	0.841	237	Membrane bound Lysosomal	2.9	yes	yes
SPSC_00092	scaffold00002	221446	222117	1	yes	0.892	223	Vacuolar	4.5	yes	yes
SPSC_00093	scaffold00002	222670	223323	1	yes	0.902	217	Extracellular (Secreted)	5.4	yes	yes
SPSC_00094	scaffold00002	226079	226600	1	yes	0.848	173	Membrane bound Extracellular (Secreted)	5.7	yes	yes
SPSC_00095	scaffold00002	227539	228228	1	yes	0.738	229	Extracellular (Secreted)	6.5	yes	yes
SPSC_00096	scaffold00002	229468	230136	1	yes	0.849	222	Mitochondrial	6.2	yes	yes
SPSC_00097	scaffold00002	234710	235261	1	yes	0.9	183	Extracellular (Secreted)	7.3	yes	yes
SPSC_00098	scaffold00002	235819	236310	1	yes	0.786	163	Plasma membrane	4.8	yes	yes
SPSC_00099	scaffold00002	236869	238504	1	no	0.128	467	Cytoplasmic	8.9	no	no
SPSC_00100	scaffold00002	238908	241427	-1	no	0.103	839	Plasma membrane	5.8	no	no
SPSC_00101	scaffold00002	248188	248739	1	no	0.144	183	Cytoplasmic	4.2	no	no
SPSC_00102	scaffold00002	249420	251291	1	no	0.105	623	Cytoplasmic	4.2	no	no
SPSC_00103	scaffold00002	252422	256939	1	yes	0.908	1505	Plasma membrane	8.2	yes	no
SPSC_00104	scaffold00002	259627	262413	1	no	0.102	928	Cytoplasmic	3.8	no	no
SPSC_00105	scaffold00002	263994	270293	1	no	0.133	2099	Cytoplasmic	3.9	no	no
SPSC_00106	scaffold00002	270686	272590	-1	no	0.12	634	Nuclear	2.2	no	no
SPSC_00107	scaffold00002	273793	275530	1	no	0.157	577	Membrane bound Mitochondrial	4.3	no	no
SPSC_00108	scaffold00002	276219	277142	-1	no	0.198	307	Plasma membrane	5.4	no	no
SPSC_00109	scaffold00002	278097	280517	-1	no	0.102	806	Plasma membrane	7.2	no	no
SPSC_00110	scaffold00002	283188	286495	1	no	0.238	1034	Membrane bound Lysosomal	5.4	no	no
SPSC_00111	scaffold00002	286859	288697	-1	no	0.141	612	Nuclear	6.2	no	no
SPSC_00112	scaffold00002	289385	291256	1	no	0.121	623	Nuclear	5.4	no	no
SPSC_00113	scaffold00002	291446	291958	-1	no	0.107	170	Nuclear	9.5	no	no
SPSC_00114	scaffold00002	292784	293720	1	no	0.103	276	Nuclear	5.9	no	no
SPSC_00115	scaffold00002	294238	294548	-1	no	0.204	60	Membrane bound Mitochondrial	9.3	no	no
SPSC_00116	scaffold00002	295828	299469	1	no	0.205	1213	Cytoplasmic	8.1	no	no
SPSC_00117	scaffold00002	300737	304045	1	no	0.121	1102	Cytoplasmic	4.1	no	no
SPSC_00118	scaffold00002	304476	305223	-1	no	0.11	206	Cytoplasmic	9.1	no	no
SPSC_00119	scaffold00002	305992	307863	1	no	0.106	623	Nuclear	6.6	no	no
SPSC_00120	scaffold00002	310248	315113	1	no	0.1	1621	Cytoplasmic	5.2	no	no
SPSC_00121	scaffold00002	315959	317188	1	no	0.113	409	Plasma membrane	6.4	no	no
SPSC_00122	scaffold00002	317950	320436	1	no	0.109	828	Nuclear	3.4	no	no
SPSC_00123	scaffold00002	321339	323807	1	no	0.115	822	Membrane bound Mitochondrial	7.8	no	no
SPSC_00124	scaffold00002	324035	326137	-1	no	0.105	700	Nuclear	7	no	no
SPSC_00125	scaffold00002	328115	329741	1	no	0.109	509	Plasma membrane	8.7	no	no
SPSC_00126	scaffold00002	330397	333430	1	no	0.124	1010	Membrane bound Mitochondrial	3.2	no	no
SPSC_00127	scaffold00002	333526	335346	-1	no	0.128	606	Membrane bound Mitochondrial	3.2	no	no
SPSC_00128	scaffold00002	336079	337674	1	no	0.13	531	Membrane bound Mitochondrial	2.1	no	no
SPSC_00129	scaffold00002	345578	347800	1	no	0.107	740	Nuclear	4.8	no	no
SPSC_00130	scaffold00002	348037	349644	-1	yes	0.853	535	Nuclear	5.7	yes	yes
SPSC_00131	scaffold00002	350004	352838	1	no	0.165	944	Membrane bound Mitochondrial	7.3	no	no
SPSC_00132	scaffold00002	352903	353678	-1	no	0.104	228	Cytoplasmic	7.3	no	no
SPSC_00133	scaffold00002	354705	356846	1	no	0.102	713	Plasma membrane	2.6	no	no
SPSC_00134	scaffold00002	357804	359630	1	no	0.112	608	Nuclear	6	no	no
SPSC_00135	scaffold00002	359853	361676	-1	no	0.139	574	Membrane bound Mitochondrial	4.7	no	no
SPSC_00136	scaffold00002	362047	364025	1	no	0.133	341	Nuclear	6.7	no	no
SPSC_00137	scaffold00002	364154	364951	-1	no	0.102	265	Nuclear	3.1	no	no
SPSC_00138	scaffold00002	365618	366694	-1	no	0.293	358	Cytoplasmic	8.8	no	no
SPSC_00139	scaffold00002	367718	370579	-1	no	0.112	953	Cytoplasmic	7.5	no	no
SPSC_00140	scaffold00002	371348	372994	-1	no	0.111	548	Cytoplasmic	9.9	no	no
SPSC_00141	scaffold00002	377735	381319	-1	no	0.378	1194	Plasma membrane	6.8	no	no
SPSC_00142	scaffold00002	382441	384124	-1	no	0.126	465	Membrane bound Mitochondrial	4.5	no	no
SPSC_00143	scaffold00002	385295	387469	-1	no	0.112	724	Nuclear	7.5	no	no
SPSC_00144	scaffold00002	387763	389703	1	no	0.105	646	Nuclear	6.1	no	no
SPSC_00145	scaffold00002	390635	392557	-1	no	0.114	469	Cytoplasmic	9.9	no	no
SPSC_00146	scaffold00002	394004	394711	-1	yes	0.667	235	Extracellular (Secreted)	9.5	yes	yes
SPSC_00147	scaffold00002	395863	396330	1	no	0.352	122	Extracellular (Secreted)	3.9	yes	no
SPSC_00148	scaffold00002	396546	398345	-1	no	0.108	599	Nuclear	7.1	no	no
SPSC_00149	scaffold00002	400732	403839	-1	no	0.101	1035	Nuclear	5.8	no	no
SPSC_00150	scaffold00002	404384	405294	-1	no	0.125	275	Plasma membrane	7.6	no	no
SPSC_00151	scaffold00002	406466	407968	-1	no	0.1	500	Nuclear	6.4	no	no
SPSC_00152	scaffold00002	409481	413026	1	no	0.154	1181	Endoplasmic reticulum	6	no	no
SPSC_00153	scaffold00002	414845	417505	1	no	0.109	886	Plasma membrane	7.3	no	no
SPSC_00154	scaffold00002	418442	420564	1	no	0.107	707	Membrane bound Mitochondrial	5.8	no	no
SPSC_00155	scaffold00002	421032	423675	-1	no	0.104	842	Nuclear	4.7	no	no
SPSC_00156	scaffold00002	426351	427466	-1	no	0.107	346	Nuclear	6.8	no	no
SPSC_00157	scaffold00002	427835	429862	-1	no	0.122	675	Cytoplasmic	4.4	no	no
SPSC_00158	scaffold00002	430259	433207	-1	no	0.107	982	Nuclear	7	no	no
SPSC_00159	scaffold00002	435039	436820	1	no	0.147	593	Membrane bound Mitochondrial	9.1	no	no
SPSC_00160	scaffold00002	437048	439594	-1	no	0.099	848	Cytoplasmic	9.7	no	no
SPSC_00161	scaffold00002	441191	443631	-1	no	0.212	543	Membrane bound Mitochondrial	9.9	no	no
SPSC_00162	scaffold00002	444737	445534	1	no	0.159	265	Mitochondrial	9.2	no	no
SPSC_00163	scaffold00002	445825	450108	-1	no	0.099	1427	Membrane bound Vacuolar	8.5	no	no
SPSC_00164	scaffold00002	454005	456227	1	no	0.104	740	Membrane bound Vacuolar	4.9	no	no
SPSC_00165	scaffold00002	457687	458656	-1	no	0.198	281	Nuclear	3.8	no	no
SPSC_00166	scaffold00002	459865	466059	1	no	0.12	2064	Plasma membrane	4.8	no	no
SPSC_00167	scaffold00002	466245	466907	-1	no	0.121	220	Plasma membrane	3.8	no	no
SPSC_00168	scaffold00002	468596	470266	-1	no	0.104	556	Membrane bound Mitochondrial	6.3	no	no
SPSC_00169	scaffold00002	472793	476518	-1	no	0.104	1241	Cytoplasmic	3.2	no	no
SPSC_00170	scaffold00002	480371	481387	1	no	0.105	338	Nuclear	10	no	no
SPSC_00171	scaffold00002	482779	485254	-1	no	0.116	705	Plasma membrane	4.1	no	no
SPSC_00172	scaffold00002	487529	488545	-1	no	0.113	212	Plasma membrane	3.8	no	no
SPSC_00173	scaffold00002	489847	491628	-1	no	0.127	593	Plasma membrane	4	no	no
SPSC_00174	scaffold00002	493252	495501	1	no	0.113	749	Nuclear	7.3	no	no
SPSC_00175	scaffold00002	495954	497636	-1	no	0.101	560	Plasma membrane	9.7	no	no
SPSC_00176	scaffold00002	498643	500625	-1	no	0.229	660	Nuclear	3.3	no	no
SPSC_00177	scaffold00002	501743	503905	1	no	0.108	719	Plasma membrane	2.7	no	no
SPSC_00178	scaffold00002	508877	511825	1	no	0.129	982	Cytoplasmic	4.9	no	no
SPSC_00179	scaffold00002	512494	514602	1	no	0.221	702	Cytoplasmic	3.4	no	no
SPSC_00180	scaffold00002	514844	518515	-1	no	0.104	1223	Nuclear	5.8	no	no
SPSC_00181	scaffold00002	523240	524900	-1	no	0.104	528	Membrane bound Mitochondrial	2.6	no	no
SPSC_00182	scaffold00002	525434	526480	1	no	0.135	289	Nuclear	9.9	no	no
SPSC_00183	scaffold00002	526717	527346	-1	no	0.287	178	Membrane bound Mitochondrial	4.3	no	no
SPSC_00184	scaffold00002	527636	530473	-1	no	0.122	945	Membrane bound Mitochondrial	8.2	no	no
SPSC_00185	scaffold00002	531167	532354	1	no	0.098	395	Cytoplasmic	10	no	no
SPSC_00186	scaffold00002	532964	533869	1	no	0.144	301	Nuclear	4.5	no	no
SPSC_00187	scaffold00002	535422	536204	1	no	0.122	260	Nuclear	4.1	no	no
SPSC_00188	scaffold00002	536920	540292	-1	no	0.112	1026	Nuclear	3	no	no
SPSC_00189	scaffold00002	541696	542482	-1	no	0.176	227	Extracellular (Secreted)	3.8	yes	no
SPSC_00190	scaffold00002	543009	545044	1	no	0.155	590	Membrane bound Mitochondrial	5.4	no	no
SPSC_00191	scaffold00002	543476	545044	1	no	0.103	522	Cytoplasmic	10	no	no
SPSC_00192	scaffold00002	550477	554163	1	no	0.116	1228	Cytoplasmic	4.3	no	no
SPSC_00193	scaffold00002	554692	555809	1	no	0.104	343	Cytoplasmic	6.6	no	no
SPSC_00194	scaffold00002	556131	557273	1	no	0.105	380	Cytoplasmic	4.3	no	no
SPSC_00195	scaffold00002	558904	560235	1	no	0.106	443	Nuclear	4.9	no	no
SPSC_00196	scaffold00002	561037	562794	-1	no	0.112	585	Nuclear	7.6	no	no
SPSC_00197	scaffold00002	563543	565174	-1	no	0.159	543	Plasma membrane	9.5	no	no
SPSC_00198	scaffold00002	567024	568349	1	no	0.107	441	Membrane bound Mitochondrial	9.2	no	no
SPSC_00199	scaffold00002	569161	570375	1	no	0.109	404	Mitochondrial	3.9	no	no
SPSC_00200	scaffold00002	571732	573405	-1	no	0.186	521	Plasma membrane	9.7	no	no
SPSC_00201	scaffold00002	574341	576059	-1	no	0.104	572	Nuclear	5.3	no	no
SPSC_00202	scaffold00002	576733	578454	1	no	0.109	573	Nuclear	9.9	no	no
SPSC_00203	scaffold00002	578720	582476	-1	no	0.139	1251	Cytoplasmic	3.9	no	no
SPSC_00204	scaffold00002	584298	587195	1	no	0.12	965	Cytoplasmic	3.4	no	no
SPSC_00205	scaffold00002	589768	591213	1	yes	0.509	481	Membrane bound Extracellular (Secreted)	6.4	yes	yes
SPSC_00206	scaffold00002	591523	596044	-1	no	0.131	1442	Plasma membrane	3.4	no	no
SPSC_00207	scaffold00002	596635	598804	1	no	0.185	689	Plasma membrane	7.8	no	no
SPSC_00208	scaffold00002	599120	601243	-1	no	0.107	707	Plasma membrane	9.2	no	no
SPSC_00209	scaffold00002	606523	607977	1	no	0.104	484	Cytoplasmic	3	no	no
SPSC_00210	scaffold00002	608556	610181	-1	no	0.121	541	Membrane bound Mitochondrial	6.2	no	no
SPSC_00211	scaffold00002	613128	613673	-1	no	0.132	181	Nuclear	9.4	no	no
SPSC_00212	scaffold00002	614246	615352	1	no	0.12	368	Extracellular (Secreted)	4.2	yes	no
SPSC_00213	scaffold00002	615924	619523	1	no	0.104	1199	Nuclear	4.1	no	no
SPSC_00214	scaffold00002	622748	623857	-1	no	0.119	369	Membrane bound Endoplasmic reticulum	4	no	no
SPSC_00215	scaffold00002	624158	625636	-1	no	0.106	492	Cytoplasmic	8.4	no	no
SPSC_00216	scaffold00002	626289	628628	1	no	0.104	779	Membrane bound Endoplasmic reticulum	8.9	no	no
SPSC_00217	scaffold00002	628753	629517	-1	no	0.109	254	Cytoplasmic	8.5	no	no
SPSC_00218	scaffold00002	629752	630804	1	no	0.124	350	Membrane bound Mitochondrial	5.1	no	no
SPSC_00219	scaffold00002	631086	632030	1	no	0.112	314	Nuclear	6	no	no
SPSC_00220	scaffold00002	632155	634110	-1	no	0.153	651	Membrane bound Mitochondrial	7.1	no	no
SPSC_00221	scaffold00003	2	847	-1	no	0.263	282	Membrane bound Mitochondrial	9.1	no	no
SPSC_00222	scaffold00003	5796	7244	1	no	0.107	482	Membrane bound Extracellular (Secreted)	2.3	no	no
SPSC_00223	scaffold00004	957	3389	-1	no	0.106	810	Cytoplasmic	3.6	no	no
SPSC_00224	scaffold00004	3825	4946	1	no	0.13	373	Cytoplasmic	10	no	no
SPSC_00225	scaffold00004	5241	8226	-1	no	0.107	961	Nuclear	10	no	no
SPSC_00226	scaffold00004	8866	9876	1	no	0.13	306	Nuclear	4.2	no	no
SPSC_00227	scaffold00004	10003	14733	-1	no	0.127	1576	Membrane bound Endoplasmic reticulum	2.5	no	no
SPSC_00228	scaffold00004	16705	17874	1	no	0.109	389	Mitochondrial	9.5	no	no
SPSC_00229	scaffold00004	18066	21062	-1	no	0.197	998	Membrane bound Mitochondrial	9.2	no	no
SPSC_00230	scaffold00004	21955	22400	1	no	0.102	82	Nuclear	5.7	no	no
SPSC_00231	scaffold00004	22539	23959	-1	no	0.114	447	Nuclear	5.7	no	no
SPSC_00232	scaffold00004	24337	26649	1	no	0.197	770	Nuclear	6.6	no	no
SPSC_00233	scaffold00004	26760	30608	-1	no	0.101	1282	Cytoplasmic	7.3	no	no
SPSC_00234	scaffold00004	31073	32659	1	no	0.109	528	Cytoplasmic	4.9	no	no
SPSC_00235	scaffold00004	34091	36619	1	no	0.128	842	Membrane bound Endoplasmic reticulum	6.4	no	no
SPSC_00236	scaffold00004	36904	39417	-1	no	0.105	837	Nuclear	4.7	no	no
SPSC_00237	scaffold00004	40878	44063	1	no	0.112	1061	Nuclear	10	no	no
SPSC_00238	scaffold00004	44208	45783	-1	no	0.13	524	Membrane bound Peroxisomal	6.4	no	no
SPSC_00239	scaffold00004	46062	48630	-1	no	0.14	705	Mitochondrial	8.9	no	no
SPSC_00240	scaffold00004	49953	51170	-1	no	0.187	405	Membrane bound Mitochondrial	4.1	no	no
SPSC_00241	scaffold00004	51434	54034	1	no	0.102	866	Cytoplasmic	9.1	no	no
SPSC_00242	scaffold00004	54896	55792	1	no	0.101	298	Cytoplasmic	8.2	no	no
SPSC_00243	scaffold00004	56125	60207	1	no	0.129	1360	Cytoplasmic	4.6	no	no
SPSC_00244	scaffold00004	60286	62685	-1	no	0.099	799	Plasma membrane	6.4	no	no
SPSC_00245	scaffold00004	65877	67457	1	no	0.105	526	Membrane bound Peroxisomal	7.6	no	no
SPSC_00246	scaffold00004	67763	69772	-1	no	0.122	669	Nuclear	10	no	no
SPSC_00247	scaffold00004	70459	71454	1	no	0.104	331	Cytoplasmic	7.9	no	no
SPSC_00248	scaffold00004	71671	76086	-1	no	0.14	1471	Plasma membrane	3.1	no	no
SPSC_00249	scaffold00004	76701	79370	1	no	0.115	889	Nuclear	9.7	no	no
SPSC_00250	scaffold00004	79622	80080	-1	no	0.221	106	Mitochondrial	9.3	no	no
SPSC_00251	scaffold00004	80483	82453	1	no	0.146	656	Membrane bound Mitochondrial	3.2	no	no
SPSC_00252	scaffold00004	82598	84511	-1	no	0.155	637	Cytoplasmic	6.1	no	no
SPSC_00253	scaffold00004	85276	88185	1	no	0.106	969	Cytoplasmic	6.4	no	no
SPSC_00254	scaffold00004	88612	89733	-1	yes	0.843	340	Membrane bound Extracellular (Secreted)	9.5	yes	no
SPSC_00255	scaffold00004	91113	92861	-1	no	0.16	582	Nuclear	3.3	no	no
SPSC_00256	scaffold00004	93199	96385	-1	no	0.113	1031	Membrane bound Mitochondrial	8.8	no	no
SPSC_00257	scaffold00004	97254	98610	1	no	0.105	391	Nuclear	6.8	no	no
SPSC_00258	scaffold00004	98875	100611	-1	no	0.116	578	Membrane bound Lysosomal	6.2	no	no
SPSC_00259	scaffold00004	103205	105478	-1	no	0.191	757	Nuclear	2.5	no	no
SPSC_00260	scaffold00004	106275	107534	-1	no	0.106	419	Nuclear	9.5	no	no
SPSC_00261	scaffold00004	107930	109090	-1	no	0.149	386	Membrane bound Endoplasmic reticulum	7.3	no	no
SPSC_00262	scaffold00004	110369	111703	1	no	0.136	444	Membrane bound Mitochondrial	8.6	no	no
SPSC_00263	scaffold00004	112806	115187	-1	no	0.12	793	Plasma membrane	2.6	no	no
SPSC_00264	scaffold00004	115887	117633	1	no	0.124	436	Cytoplasmic	6.7	no	no
SPSC_00265	scaffold00004	121583	124828	1	no	0.108	1017	Nuclear	3.1	no	no
SPSC_00266	scaffold00004	125217	125879	-1	no	0.112	161	Nuclear	5.2	no	no
SPSC_00267	scaffold00004	126306	129692	1	no	0.111	1128	Nuclear	9.9	no	no
SPSC_00268	scaffold00004	129799	133056	-1	no	0.112	1085	Cytoplasmic	4.6	no	no
SPSC_00269	scaffold00004	133384	134312	1	no	0.102	245	Golgi	7.7	no	no
SPSC_00270	scaffold00004	134766	137144	1	no	0.123	792	Nuclear	5.2	no	no
SPSC_00271	scaffold00004	137300	137773	-1	no	0.165	107	Nuclear	4.5	no	no
SPSC_00272	scaffold00004	138156	139352	1	no	0.145	398	Membrane bound Mitochondrial	2.2	no	no
SPSC_00273	scaffold00004	139472	141348	-1	no	0.131	539	Membrane bound Mitochondrial	4.2	no	no
SPSC_00274	scaffold00004	142012	143700	1	no	0.24	562	Membrane bound Mitochondrial	9.9	no	no
SPSC_00275	scaffold00004	143908	144270	-1	no	0.125	120	Plasma membrane	2.2	no	no
SPSC_00276	scaffold00004	146572	160701	1	no	0.1	4170	Cytoplasmic	3.3	no	no
SPSC_00277	scaffold00004	162562	164598	1	no	0.32	678	Membrane bound Endoplasmic reticulum	5.4	no	no
SPSC_00278	scaffold00004	165315	166448	-1	yes	0.53	377	Membrane bound Mitochondrial	9.7	yes	no
SPSC_00279	scaffold00004	167666	169435	1	no	0.117	589	Cytoplasmic	9	no	no
SPSC_00280	scaffold00004	170015	171616	-1	no	0.111	533	Plasma membrane	8	no	no
SPSC_00281	scaffold00004	173994	174698	1	no	0.377	234	Mitochondrial	9.5	no	no
SPSC_00282	scaffold00004	178818	179458	-1	no	0.102	61	Cytoplasmic	9.8	no	no
SPSC_00283	scaffold00004	179988	181842	1	no	0.359	591	Membrane bound Endoplasmic reticulum	5.7	no	no
SPSC_00284	scaffold00004	181998	186278	-1	no	0.117	1215	Cytoplasmic	4.2	no	no
SPSC_00285	scaffold00004	187585	190656	-1	no	0.103	1023	Cytoplasmic	3.5	no	no
SPSC_00286	scaffold00004	190955	191530	1	no	0.125	161	Cytoplasmic	6.3	no	no
SPSC_00287	scaffold00004	192120	192625	-1	no	0.104	136	Nuclear	9.9	no	no
SPSC_00288	scaffold00004	194020	194448	1	no	0.106	142	Nuclear	10	no	no
SPSC_00289	scaffold00004	194975	195895	-1	no	0.102	222	Cytoplasmic	5.2	no	no
SPSC_00290	scaffold00004	198967	202395	1	no	0.103	1142	Nuclear	4.5	no	no
SPSC_00291	scaffold00004	202986	204056	1	no	0.104	356	Membrane bound Mitochondrial	4.6	no	no
SPSC_00292	scaffold00004	204506	205262	1	no	0.146	218	Nuclear	7.4	no	no
SPSC_00293	scaffold00004	205550	208237	-1	no	0.117	895	Nuclear	5.1	no	no
SPSC_00294	scaffold00004	208839	210170	-1	no	0.132	443	Cytoplasmic	4.2	no	no
SPSC_00295	scaffold00004	211113	212582	-1	no	0.111	489	Mitochondrial	5.5	no	no
SPSC_00296	scaffold00004	213216	215900	1	no	0.113	894	Nuclear	4.9	no	no
SPSC_00297	scaffold00004	216031	221037	-1	yes	0.837	1668	Plasma membrane	3.8	yes	yes
SPSC_00298	scaffold00004	221729	223900	-1	yes	0.716	723	Membrane bound Extracellular (Secreted)	9.9	yes	no
SPSC_00299	scaffold00004	228075	229397	1	no	0.122	440	Cytoplasmic	9.8	no	no
SPSC_00300	scaffold00004	229922	230866	1	no	0.109	314	Cytoplasmic	9.3	no	no
SPSC_00301	scaffold00004	234742	239043	1	no	0.118	1433	Cytoplasmic	6.2	no	no
SPSC_00302	scaffold00004	240114	241785	1	no	0.173	475	Membrane bound Mitochondrial	10	no	no
SPSC_00303	scaffold00004	243558	247463	1	no	0.115	1301	Cytoplasmic	3.8	no	no
SPSC_00304	scaffold00004	249192	254117	1	no	0.101	1641	Membrane bound Mitochondrial	6.4	no	no
SPSC_00305	scaffold00004	257962	259158	-1	no	0.119	398	Cytoplasmic	2.6	no	no
SPSC_00306	scaffold00004	259471	260309	-1	no	0.172	243	Membrane bound Mitochondrial	8.7	no	no
SPSC_00307	scaffold00004	265682	266506	-1	no	0.121	274	Cytoplasmic	7.2	no	no
SPSC_00308	scaffold00004	267660	268841	-1	no	0.1	393	Membrane bound Extracellular (Secreted)	9	no	no
SPSC_00309	scaffold00004	269937	270200	1	no	0.118	87	Nuclear	9.5	no	no
SPSC_00310	scaffold00004	270851	272281	1	no	0.115	476	Cytoplasmic	2.9	no	no
SPSC_00311	scaffold00004	272999	275941	1	no	0.197	980	Cytoplasmic	4.1	no	no
SPSC_00312	scaffold00004	276129	277340	-1	no	0.096	403	Membrane bound Mitochondrial	6.7	no	no
SPSC_00313	scaffold00004	277883	281242	1	no	0.302	1119	Nuclear	2.8	no	no
SPSC_00314	scaffold00004	282312	284552	-1	no	0.131	746	Nuclear	3.9	no	no
SPSC_00315	scaffold00004	285118	285974	1	no	0.107	173	Cytoplasmic	8.4	no	no
SPSC_00316	scaffold00004	287080	288708	-1	no	0.127	542	Cytoplasmic	10	no	no
SPSC_00317	scaffold00004	289411	291453	1	no	0.167	454	Plasma membrane	7.3	no	no
SPSC_00318	scaffold00004	291559	292719	-1	no	0.108	386	Nuclear	5.5	no	no
SPSC_00319	scaffold00004	294420	296371	1	no	0.11	586	Plasma membrane	9.2	no	no
SPSC_00320	scaffold00004	297083	304243	-1	no	0.111	2386	Nuclear	9.6	no	no
SPSC_00321	scaffold00004	304979	305672	1	no	0.117	134	Nuclear	5	no	no
SPSC_00322	scaffold00004	306740	308290	1	no	0.098	516	Nuclear	6.1	no	no
SPSC_00323	scaffold00004	308409	310469	-1	no	0.127	686	Plasma membrane	3.8	no	no
SPSC_00324	scaffold00004	310956	311891	-1	no	0.122	311	Cytoplasmic	7.7	no	no
SPSC_00325	scaffold00004	312853	313605	1	yes	0.593	191	Membrane bound Golgi	5.8	yes	yes
SPSC_00326	scaffold00004	314063	316336	1	no	0.106	757	Membrane bound Mitochondrial	3.6	no	no
SPSC_00327	scaffold00004	316418	322114	-1	no	0.108	1898	Nuclear	3.9	no	no
SPSC_00328	scaffold00004	323292	327389	1	no	0.125	1365	Plasma membrane	6.2	no	no
SPSC_00329	scaffold00004	327491	329804	-1	no	0.167	770	Nuclear	5	no	no
SPSC_00330	scaffold00005	1170	2186	-1	yes	0.564	338	Membrane bound Lysosomal	4	yes	yes
SPSC_00331	scaffold00005	3089	4876	-1	yes	0.877	595	Extracellular (Secreted)	4.6	yes	yes
SPSC_00332	scaffold00005	6505	7710	1	no	0.113	401	Cytoplasmic	3.7	no	no
SPSC_00333	scaffold00005	7954	10191	-1	no	0.107	745	Membrane bound Extracellular (Secreted)	9.5	no	no
SPSC_00334	scaffold00005	11570	13180	-1	no	0.102	536	Plasma membrane	9.4	no	no
SPSC_00335	scaffold00005	14517	16649	1	no	0.105	710	Cytoplasmic	4.1	no	no
SPSC_00336	scaffold00005	17366	21148	1	no	0.109	1260	Cytoplasmic	3.8	no	no
SPSC_00337	scaffold00005	21532	22923	-1	no	0.141	463	Plasma membrane	3.6	no	no
SPSC_00338	scaffold00005	24570	26058	1	yes	0.754	459	Membrane bound Extracellular (Secreted)	2.8	yes	yes
SPSC_00339	scaffold00005	27219	29714	1	no	0.104	831	Nuclear	3.8	no	no
SPSC_00340	scaffold00005	31894	32406	-1	no	0.132	170	Membrane bound Mitochondrial	4.3	no	no
SPSC_00341	scaffold00005	32802	34337	-1	no	0.105	478	Cytoplasmic	3.8	no	no
SPSC_00342	scaffold00005	34668	37512	-1	no	0.127	887	Cytoplasmic	2.5	no	no
SPSC_00343	scaffold00005	37903	39717	-1	no	0.123	604	Membrane bound Endoplasmic reticulum	7.3	no	no
SPSC_00344	scaffold00005	45035	49165	1	no	0.105	1376	Nuclear	2.1	no	no
SPSC_00345	scaffold00005	49784	53719	1	no	0.101	1311	Nuclear	5.5	no	no
SPSC_00346	scaffold00005	54259	55578	1	no	0.102	439	Plasma membrane	5.8	no	no
SPSC_00347	scaffold00005	55999	59157	-1	no	0.107	1052	Nuclear	5.8	no	no
SPSC_00348	scaffold00005	59470	61098	1	no	0.351	542	Membrane bound Endoplasmic reticulum	5.4	no	no
SPSC_00349	scaffold00005	63881	66328	1	no	0.117	815	Plasma membrane	8.1	no	no
SPSC_00350	scaffold00005	66471	67292	-1	no	0.158	273	Plasma membrane	3.7	no	no
SPSC_00351	scaffold00005	67591	69348	1	no	0.109	585	Cytoplasmic	4.2	no	no
SPSC_00352	scaffold00005	70469	74245	-1	no	0.102	1258	Cytoplasmic	7.8	no	no
SPSC_00353	scaffold00005	75149	76477	-1	no	0.106	442	Nuclear	8.2	no	no
SPSC_00354	scaffold00005	76711	79014	1	no	0.127	767	Nuclear	5	no	no
SPSC_00355	scaffold00005	79250	80752	-1	no	0.179	500	Membrane bound Mitochondrial	8.7	no	no
SPSC_00356	scaffold00005	82990	83723	1	no	0.117	215	Plasma membrane	7.6	no	no
SPSC_00357	scaffold00005	86281	89310	1	no	0.103	1009	Nuclear	4.4	no	no
SPSC_00358	scaffold00005	91228	92643	1	no	0.129	471	Nuclear	6	no	no
SPSC_00359	scaffold00005	93247	96138	-1	no	0.135	963	Nuclear	9.8	no	no
SPSC_00360	scaffold00005	96659	99271	1	no	0.135	870	Nuclear	3.8	no	no
SPSC_00361	scaffold00005	99684	101357	-1	no	0.108	557	Membrane bound Endoplasmic reticulum	6.8	no	no
SPSC_00362	scaffold00005	102789	105041	-1	no	0.102	750	Nuclear	6.3	no	no
SPSC_00363	scaffold00005	106473	108761	1	no	0.141	762	Membrane bound Golgi	6.8	no	no
SPSC_00364	scaffold00005	109492	110396	-1	no	0.157	301	Membrane bound Mitochondrial	2.7	no	no
SPSC_00365	scaffold00005	113047	113986	1	no	0.106	227	Cytoplasmic	6.7	no	no
SPSC_00366	scaffold00005	114518	116272	-1	no	0.115	584	Cytoplasmic	9.5	no	no
SPSC_00367	scaffold00005	116852	117480	1	no	0.102	152	Plasma membrane	4.9	no	no
SPSC_00368	scaffold00005	117641	118903	-1	no	0.16	420	Membrane bound Mitochondrial	9.9	no	no
SPSC_00369	scaffold00005	119597	120531	-1	no	0.102	120	Plasma membrane	6.4	no	no
SPSC_00370	scaffold00005	121178	121753	1	no	0.292	161	Membrane bound Mitochondrial	8.6	no	no
SPSC_00371	scaffold00005	122050	124713	-1	no	0.102	887	Cytoplasmic	5.6	no	no
SPSC_00372	scaffold00005	125730	127427	-1	no	0.13	565	Cytoplasmic	3.2	no	no
SPSC_00373	scaffold00005	128423	129259	1	no	0.131	278	Nuclear	4.1	no	no
SPSC_00374	scaffold00005	129752	132127	1	no	0.117	791	Membrane bound Mitochondrial	2	no	no
SPSC_00375	scaffold00005	132841	134010	1	yes	0.484	359	Cytoplasmic	8.6	yes	no
SPSC_00376	scaffold00005	134345	135066	-1	no	0.12	212	Cytoplasmic	7.2	no	no
SPSC_00377	scaffold00005	135490	136652	-1	no	0.169	357	Membrane bound Peroxisomal	4.3	no	no
SPSC_00378	scaffold00005	137116	137463	1	no	0.116	115	Mitochondrial	2.8	no	no
SPSC_00379	scaffold00005	137487	138684	-1	no	0.313	341	Plasma membrane	2.7	no	no
SPSC_00380	scaffold00005	138582	140273	1	no	0.115	338	Membrane bound Peroxisomal	7	no	no
SPSC_00381	scaffold00005	141376	146286	1	no	0.121	1636	Plasma membrane	7.9	no	no
SPSC_00382	scaffold00005	146648	148339	1	no	0.278	563	Membrane bound Mitochondrial	4.8	no	no
SPSC_00383	scaffold00005	148788	150209	-1	no	0.126	473	Nuclear	6.6	no	no
SPSC_00384	scaffold00005	154661	155914	-1	no	0.14	417	Membrane bound Mitochondrial	7.2	no	no
SPSC_00385	scaffold00005	156141	156559	1	no	0.111	107	Plasma membrane	9.1	no	no
SPSC_00386	scaffold00005	156653	158836	-1	no	0.108	727	Nuclear	6	no	no
SPSC_00387	scaffold00005	159344	160382	1	no	0.136	258	Nuclear	4.7	no	no
SPSC_00388	scaffold00005	161300	162511	1	no	0.109	403	Nuclear	7.3	no	no
SPSC_00389	scaffold00005	163243	168162	-1	no	0.105	1639	Nuclear	2.4	no	no
SPSC_00390	scaffold00005	169227	170603	1	no	0.114	458	Cytoplasmic	3.8	no	no
SPSC_00391	scaffold00005	170704	172668	-1	no	0.118	654	Plasma membrane	6.4	no	no
SPSC_00392	scaffold00005	173063	175189	1	no	0.145	708	Nuclear	5.5	no	no
SPSC_00393	scaffold00005	175563	176420	1	no	0.273	285	Mitochondrial	6.9	no	no
SPSC_00394	scaffold00005	177630	182071	-1	no	0.107	1302	Plasma membrane	8.9	no	no
SPSC_00395	scaffold00005	182474	186430	-1	no	0.109	1318	Plasma membrane	7.9	no	no
SPSC_00396	scaffold00005	188491	191484	-1	no	0.129	997	Membrane bound Mitochondrial	5.3	no	no
SPSC_00397	scaffold00005	194809	198489	1	no	0.122	1226	Cytoplasmic	3.4	no	no
SPSC_00398	scaffold00005	200202	201863	1	no	0.108	525	Membrane bound Endoplasmic reticulum	6.6	no	no
SPSC_00399	scaffold00005	202118	204019	-1	no	0.178	633	Plasma membrane	9.9	no	no
SPSC_00400	scaffold00005	205597	209478	1	no	0.131	1293	Nuclear	9.2	no	no
SPSC_00401	scaffold00005	209616	210951	-1	no	0.169	444	Membrane bound Mitochondrial	5.7	no	no
SPSC_00402	scaffold00005	211534	218231	-1	no	0.104	2198	Membrane bound Endoplasmic reticulum	4.6	no	no
SPSC_00403	scaffold00005	220296	221354	1	no	0.106	352	Nuclear	5.4	no	no
SPSC_00404	scaffold00005	221424	223955	-1	no	0.221	843	Nuclear	3.9	no	no
SPSC_00405	scaffold00005	225275	226753	-1	no	0.108	173	Nuclear	9.5	no	no
SPSC_00406	scaffold00005	230125	231531	1	no	0.122	439	Mitochondrial	8.7	no	no
SPSC_00407	scaffold00005	231817	232344	-1	no	0.11	175	Mitochondrial	5.5	no	no
SPSC_00408	scaffold00005	233310	234374	1	no	0.124	354	Cytoplasmic	9.7	no	no
SPSC_00409	scaffold00005	235332	236648	-1	yes	0.671	438	Plasma membrane	6.8	yes	yes
SPSC_00410	scaffold00005	242140	242881	1	yes	0.93	217	Plasma membrane	5	yes	yes
SPSC_00411	scaffold00005	243148	246567	-1	no	0.109	1139	Plasma membrane	10	no	no
SPSC_00412	scaffold00005	247159	248847	-1	no	0.165	562	Nuclear	10	no	no
SPSC_00413	scaffold00005	249267	250418	-1	no	0.125	383	Cytoplasmic	4	no	no
SPSC_00414	scaffold00005	251257	253242	-1	no	0.108	661	Membrane bound Mitochondrial	6.6	no	no
SPSC_00415	scaffold00005	253808	254761	1	no	0.145	317	Nuclear	5.8	no	no
SPSC_00416	scaffold00005	254977	258090	-1	no	0.216	1037	Plasma membrane	4.3	no	no
SPSC_00417	scaffold00005	259048	259797	1	no	0.161	249	Mitochondrial	9.9	no	no
SPSC_00418	scaffold00005	261355	263319	1	no	0.112	616	Cytoplasmic	9.8	no	no
SPSC_00419	scaffold00005	264339	265235	1	no	0.11	298	Nuclear	5.6	no	no
SPSC_00420	scaffold00005	265479	267818	-1	no	0.119	779	Membrane bound Mitochondrial	8.6	no	no
SPSC_00421	scaffold00005	268421	269148	-1	no	0.125	223	Nuclear	3.1	no	no
SPSC_00422	scaffold00005	270771	273209	1	no	0.103	812	Membrane bound Mitochondrial	9.9	no	no
SPSC_00423	scaffold00005	274259	275299	1	no	0.218	346	Membrane bound Endoplasmic reticulum	8.5	no	no
SPSC_00424	scaffold00005	275555	277459	-1	no	0.295	634	Cytoplasmic	3.2	no	no
SPSC_00425	scaffold00005	278105	280786	1	no	0.103	893	Cytoplasmic	3.3	no	no
SPSC_00426	scaffold00005	281079	285611	-1	no	0.103	1510	Nuclear	9.9	no	no
SPSC_00427	scaffold00005	287157	289616	-1	no	0.168	819	Membrane bound Mitochondrial	9.3	no	no
SPSC_00428	scaffold00005	290055	290861	1	yes	0.527	268	Mitochondrial	9.9	yes	no
SPSC_00429	scaffold00005	291130	292420	-1	no	0.11	333	Membrane bound Mitochondrial	8.5	no	no
SPSC_00430	scaffold00005	292972	294108	1	no	0.207	378	Membrane bound Mitochondrial	6.4	no	no
SPSC_00431	scaffold00005	294224	299881	-1	no	0.113	1885	Cytoplasmic	5.9	no	no
SPSC_00432	scaffold00005	301307	302830	-1	no	0.108	507	Plasma membrane	3.8	no	no
SPSC_00433	scaffold00005	305999	307537	-1	no	0.13	512	Membrane bound Mitochondrial	7	no	no
SPSC_00434	scaffold00005	308366	310158	1	no	0.107	574	Nuclear	5	no	no
SPSC_00435	scaffold00005	310650	312449	-1	no	0.117	599	Nuclear	5.6	no	no
SPSC_00436	scaffold00005	316336	316968	1	no	0.112	210	Cytoplasmic	8.8	no	no
SPSC_00437	scaffold00005	317635	320877	-1	no	0.101	1080	Cytoplasmic	6.9	no	no
SPSC_00438	scaffold00005	321841	322753	1	no	0.2	277	Membrane bound Peroxisomal	6.6	no	no
SPSC_00439	scaffold00005	322962	326420	-1	no	0.104	1152	Plasma membrane	2.4	no	no
SPSC_00440	scaffold00005	327301	329013	1	no	0.125	570	Membrane bound Endoplasmic reticulum	7	no	no
SPSC_00441	scaffold00005	329161	330445	-1	yes	0.913	390	Membrane bound Golgi	8.5	yes	no
SPSC_00442	scaffold00005	331098	331883	-1	no	0.196	261	Membrane bound Mitochondrial	9.6	no	no
SPSC_00443	scaffold00005	332272	335838	1	no	0.103	1188	Membrane bound Mitochondrial	7.9	no	no
SPSC_00444	scaffold00005	336905	338324	1	no	0.099	172	Plasma membrane	9.9	no	no
SPSC_00445	scaffold00005	339394	342387	1	no	0.141	961	Membrane bound Mitochondrial	4.7	no	no
SPSC_00446	scaffold00005	342728	344569	1	no	0.104	613	Cytoplasmic	4.8	no	no
SPSC_00447	scaffold00005	344760	346589	-1	no	0.103	609	Plasma membrane	9.5	no	no
SPSC_00448	scaffold00005	348504	350069	-1	no	0.117	521	Cytoplasmic	9.8	no	no
SPSC_00449	scaffold00005	351933	354365	1	no	0.128	810	Membrane bound Peroxisomal	5.5	no	no
SPSC_00450	scaffold00005	364772	368239	1	no	0.146	1155	Nuclear	4.2	no	no
SPSC_00451	scaffold00005	368500	369226	-1	no	0.142	80	Membrane bound Mitochondrial	10	no	no
SPSC_00452	scaffold00005	372442	374116	1	no	0.108	355	Cytoplasmic	9.8	no	no
SPSC_00453	scaffold00005	374784	377522	-1	no	0.191	912	Cytoplasmic	4	no	no
SPSC_00454	scaffold00005	379005	380129	1	no	0.176	374	Mitochondrial	9.2	no	no
SPSC_00455	scaffold00005	380740	381389	1	no	0.308	184	Membrane bound Mitochondrial	6.7	no	no
SPSC_00456	scaffold00005	382268	384475	1	no	0.119	735	Cytoplasmic	9.5	no	no
SPSC_00457	scaffold00005	384586	386154	-1	no	0.237	522	Nuclear	5.1	no	no
SPSC_00458	scaffold00005	387645	388624	1	no	0.4	136	Cytoplasmic	9	no	no
SPSC_00459	scaffold00005	389252	390832	1	no	0.101	526	Nuclear	4.3	no	no
SPSC_00460	scaffold00005	391495	394965	1	no	0.119	1156	Cytoplasmic	6.6	no	no
SPSC_00461	scaffold00005	403870	405779	1	no	0.118	598	Nuclear	6.9	no	no
SPSC_00462	scaffold00005	407048	408193	1	no	0.13	381	Membrane bound Mitochondrial	9.9	no	no
SPSC_00463	scaffold00005	408810	410325	1	no	0.121	477	Membrane bound Mitochondrial	9.9	no	no
SPSC_00464	scaffold00005	410468	411624	-1	no	0.105	328	Mitochondrial	7	no	no
SPSC_00465	scaffold00005	412238	414016	1	no	0.128	592	Plasma membrane	7.2	no	no
SPSC_00466	scaffold00005	414216	416385	-1	no	0.113	644	Nuclear	5.1	no	no
SPSC_00467	scaffold00005	418506	419692	-1	no	0.102	354	Nuclear	5.3	no	no
SPSC_00468	scaffold00005	420250	421379	1	no	0.115	340	Nuclear	3.7	no	no
SPSC_00469	scaffold00005	422535	429529	1	no	0.137	2292	Cytoplasmic	9.4	no	no
SPSC_00470	scaffold00005	430451	431782	1	no	0.106	443	Plasma membrane	2.7	no	no
SPSC_00471	scaffold00005	432303	432774	-1	no	0.157	78	Membrane bound Mitochondrial	7.9	no	no
SPSC_00472	scaffold00005	437155	440723	1	no	0.102	1045	Nuclear	6.5	no	no
SPSC_00473	scaffold00005	441137	442228	-1	no	0.106	363	Membrane bound Mitochondrial	9.2	no	no
SPSC_00474	scaffold00005	443440	447345	1	no	0.133	1301	Cytoplasmic	6.4	no	no
SPSC_00475	scaffold00005	447871	449000	1	no	0.109	347	Nuclear	9.8	no	no
SPSC_00476	scaffold00005	451195	453093	1	yes	0.892	632	Membrane bound Extracellular (Secreted)	7.7	yes	yes
SPSC_00477	scaffold00005	453234	454054	-1	no	0.103	150	Cytoplasmic	7.4	no	no
SPSC_00478	scaffold00005	454347	455037	-1	no	0.102	217	Mitochondrial	8.2	no	no
SPSC_00479	scaffold00005	455407	456907	1	no	0.137	499	Plasma membrane	9	no	no
SPSC_00480	scaffold00005	456996	459409	-1	no	0.147	778	Membrane bound Peroxisomal	8.8	no	no
SPSC_00481	scaffold00005	460161	460821	1	no	0.104	123	Cytoplasmic	7.9	no	no
SPSC_00482	scaffold00005	460945	464859	-1	no	0.107	1304	Nuclear	5.3	no	no
SPSC_00483	scaffold00005	465532	468141	-1	no	0.128	869	Membrane bound Mitochondrial	9.2	no	no
SPSC_00484	scaffold00005	468653	469714	-1	no	0.105	263	Cytoplasmic	3.6	no	no
SPSC_00485	scaffold00005	470346	471107	-1	no	0.108	253	Membrane bound Mitochondrial	10	no	no
SPSC_00486	scaffold00005	471586	474423	1	no	0.111	945	Membrane bound Mitochondrial	9	no	no
SPSC_00487	scaffold00005	474900	477650	1	no	0.373	916	Membrane bound Mitochondrial	6.4	no	no
SPSC_00488	scaffold00005	477773	478264	-1	no	0.142	163	Membrane bound Mitochondrial	8.2	no	no
SPSC_00489	scaffold00005	478701	480533	1	no	0.101	610	Cytoplasmic	5.4	no	no
SPSC_00490	scaffold00005	480683	484796	-1	no	0.118	1370	Nuclear	2.8	no	no
SPSC_00491	scaffold00005	485280	487991	1	no	0.099	903	Cytoplasmic	2.7	no	no
SPSC_00492	scaffold00005	488150	489082	-1	no	0.14	310	Membrane bound Endoplasmic reticulum	9.5	no	no
SPSC_00493	scaffold00005	489406	491385	1	no	0.132	659	Cytoplasmic	5.1	no	no
SPSC_00494	scaffold00005	492938	496198	1	no	0.107	1086	Nuclear	5.5	no	no
SPSC_00495	scaffold00005	497095	498846	-1	no	0.101	583	Plasma membrane	5.2	no	no
SPSC_00496	scaffold00005	500502	502448	-1	no	0.181	648	Membrane bound Mitochondrial	2.3	no	no
SPSC_00497	scaffold00005	502782	504833	1	no	0.401	683	Plasma membrane	3.6	no	no
SPSC_00498	scaffold00005	504886	512176	-1	no	0.104	2335	Membrane bound Mitochondrial	2.8	no	no
SPSC_00499	scaffold00005	514542	516629	1	yes	0.816	695	Membrane bound Extracellular (Secreted)	3.1	yes	yes
SPSC_00500	scaffold00005	517064	518521	-1	yes	0.831	485	Membrane bound Extracellular (Secreted)	3.6	yes	yes
SPSC_00501	scaffold00005	519725	523177	-1	no	0.107	1150	Cytoplasmic	3.6	no	no
SPSC_00502	scaffold00005	523838	525460	-1	no	0.114	540	Plasma membrane	3.9	no	no
SPSC_00503	scaffold00005	526560	528668	1	no	0.109	674	Plasma membrane	3	no	no
SPSC_00504	scaffold00005	528805	530703	-1	no	0.114	632	Nuclear	7.9	no	no
SPSC_00505	scaffold00005	531330	533027	1	no	0.105	565	Cytoplasmic	5.8	no	no
SPSC_00506	scaffold00005	534067	539220	1	no	0.1	1717	Membrane bound Peroxisomal	6	no	no
SPSC_00507	scaffold00005	539531	540772	-1	no	0.136	413	Membrane bound Vacuolar	3.7	no	no
SPSC_00508	scaffold00005	542222	542683	1	no	0.112	97	Membrane bound Mitochondrial	6.7	no	no
SPSC_00509	scaffold00005	543058	545067	-1	no	0.101	669	Nuclear	3.7	no	no
SPSC_00510	scaffold00005	548119	552824	1	no	0.113	1446	Plasma membrane	3.2	no	no
SPSC_00511	scaffold00005	553291	553992	-1	no	0.293	233	Plasma membrane	9.5	no	no
SPSC_00512	scaffold00005	554710	554976	1	no	0.1	88	Cytoplasmic	9	no	no
SPSC_00513	scaffold00005	557177	558418	1	no	0.122	379	Cytoplasmic	7.1	no	no
SPSC_00514	scaffold00005	558779	559717	-1	no	0.123	312	Mitochondrial	4.3	no	no
SPSC_00515	scaffold00005	560877	562459	1	no	0.101	496	Cytoplasmic	6.2	no	no
SPSC_00516	scaffold00005	562719	564317	-1	no	0.203	532	Plasma membrane	3.3	no	no
SPSC_00517	scaffold00005	565825	566877	1	no	0.136	350	Membrane bound Mitochondrial	3.3	no	no
SPSC_00518	scaffold00005	567190	568435	1	no	0.136	380	Membrane bound Mitochondrial	9.6	no	no
SPSC_00519	scaffold00005	569133	570302	-1	no	0.155	389	Membrane bound Endoplasmic reticulum	9.8	no	no
SPSC_00520	scaffold00005	572420	573439	1	no	0.156	339	Peroxisomal	3.5	no	no
SPSC_00521	scaffold00005	573568	575139	-1	no	0.1	523	Nuclear	6.3	no	no
SPSC_00522	scaffold00005	577218	578282	1	no	0.304	354	Membrane bound Extracellular (Secreted)	4.9	no	no
SPSC_00523	scaffold00005	584710	586893	1	no	0.131	727	Nuclear	5.1	no	no
SPSC_00524	scaffold00005	587294	588079	1	no	0.121	261	Membrane bound Mitochondrial	2.7	no	no
SPSC_00525	scaffold00005	588693	589252	-1	no	0.117	156	Membrane bound Mitochondrial	9.2	no	no
SPSC_00526	scaffold00005	589548	591743	1	no	0.11	731	Nuclear	6	no	no
SPSC_00527	scaffold00005	591970	592788	-1	no	0.148	272	Cytoplasmic	9.6	no	no
SPSC_00528	scaffold00005	593317	595125	-1	no	0.14	574	Membrane bound Endoplasmic reticulum	7.5	no	no
SPSC_00529	scaffold00005	595550	597362	1	no	0.105	472	Membrane bound Mitochondrial	5.8	no	no
SPSC_00530	scaffold00005	597421	599229	-1	no	0.112	602	Nuclear	3	no	no
SPSC_00531	scaffold00005	599564	600751	-1	no	0.11	395	Cytoplasmic	3.9	no	no
SPSC_00532	scaffold00005	601313	603160	1	no	0.157	615	Cytoplasmic	3.5	no	no
SPSC_00533	scaffold00005	603882	605765	-1	no	0.131	252	Cytoplasmic	9.6	no	no
SPSC_00534	scaffold00005	606463	607329	1	no	0.106	133	Plasma membrane	8	no	no
SPSC_00535	scaffold00005	607631	611410	-1	no	0.207	1259	Plasma membrane	5.2	no	no
SPSC_00536	scaffold00005	613145	615369	1	no	0.234	741	Plasma membrane	4	no	no
SPSC_00537	scaffold00005	618052	619995	1	yes	0.9	647	Membrane bound Vacuolar	5.9	yes	yes
SPSC_00538	scaffold00005	620315	621718	-1	no	0.118	467	Nuclear	7.4	no	no
SPSC_00539	scaffold00005	622055	623617	1	no	0.107	520	Cytoplasmic	6.2	no	no
SPSC_00540	scaffold00005	623840	625723	-1	no	0.121	407	Membrane bound Peroxisomal	6.3	no	no
SPSC_00541	scaffold00005	626250	628613	-1	no	0.113	722	Nuclear	7.2	no	no
SPSC_00542	scaffold00005	636810	639134	1	no	0.108	774	Plasma membrane	6.3	no	no
SPSC_00543	scaffold00005	639533	642981	-1	no	0.133	1149	Plasma membrane	8.4	no	no
SPSC_00544	scaffold00005	643985	645286	1	no	0.122	433	Cytoplasmic	4.4	no	no
SPSC_00545	scaffold00005	645448	647367	-1	no	0.204	639	Nuclear	4.4	no	no
SPSC_00546	scaffold00005	648113	650695	1	no	0.123	860	Cytoplasmic	6.1	no	no
SPSC_00547	scaffold00005	650943	653027	-1	no	0.14	694	Membrane bound Endoplasmic reticulum	5.8	no	no
SPSC_00548	scaffold00005	654490	655167	1	yes	0.866	225	Membrane bound Vacuolar	4.8	yes	yes
SPSC_00549	scaffold00005	660548	661483	1	yes	0.618	311	Membrane bound Mitochondrial	3.6	yes	yes
SPSC_00550	scaffold00005	661701	664523	-1	no	0.135	939	Plasma membrane	7.5	no	no
SPSC_00551	scaffold00005	666052	667257	1	no	0.108	401	Plasma membrane	5.8	no	no
SPSC_00552	scaffold00005	667746	669188	-1	no	0.107	480	Membrane bound Golgi	7.4	no	no
SPSC_00553	scaffold00005	671575	674424	1	no	0.169	948	Membrane bound Endoplasmic reticulum	5.6	no	no
SPSC_00554	scaffold00005	676480	677298	1	no	0.248	272	Membrane bound Mitochondrial	9.3	no	no
SPSC_00555	scaffold00005	677764	678777	-1	yes	0.857	337	Extracellular (Secreted)	8.4	yes	yes
SPSC_00556	scaffold00006	1642	3281	-1	yes	0.759	505	Membrane bound Extracellular (Secreted)	9.6	yes	no
SPSC_00557	scaffold00006	5053	6056	-1	no	0.103	303	Cytoplasmic	2.6	no	no
SPSC_00558	scaffold00006	6652	7698	-1	no	0.13	348	Mitochondrial	9.2	no	no
SPSC_00559	scaffold00006	8268	9404	1	no	0.121	378	Membrane bound Mitochondrial	3	no	no
SPSC_00560	scaffold00006	9499	11400	-1	yes	0.763	633	Extracellular (Secreted)	9.2	yes	yes
SPSC_00561	scaffold00006	11699	13111	1	no	0.129	422	Extracellular (Secreted)	5.3	yes	no
SPSC_00562	scaffold00006	13384	14229	-1	no	0.1	281	Mitochondrial	6.3	no	no
SPSC_00563	scaffold00006	14994	17075	-1	no	0.119	693	Nuclear	5.8	no	no
SPSC_00564	scaffold00006	20075	21658	-1	no	0.115	526	Cytoplasmic	3.4	no	no
SPSC_00565	scaffold00006	22846	24408	-1	no	0.156	520	Cytoplasmic	5.7	no	no
SPSC_00566	scaffold00006	25541	26993	1	no	0.131	170	Mitochondrial	9.9	no	no
SPSC_00567	scaffold00006	29218	29624	1	no	0.106	101	Mitochondrial	3.9	no	no
SPSC_00568	scaffold00006	29979	30533	-1	no	0.234	121	Membrane bound Mitochondrial	9.9	no	no
SPSC_00569	scaffold00006	30876	32135	1	no	0.103	419	Cytoplasmic	4	no	no
SPSC_00570	scaffold00006	32756	33541	-1	no	0.103	261	Cytoplasmic	4.5	no	no
SPSC_00571	scaffold00006	33824	34250	1	no	0.109	112	Cytoplasmic	9.4	no	no
SPSC_00572	scaffold00006	34620	35442	-1	no	0.113	127	Mitochondrial	6.3	no	no
SPSC_00573	scaffold00006	35748	37568	1	yes	0.531	578	Endoplasmic reticulum	8.3	yes	no
SPSC_00574	scaffold00006	37957	38818	-1	no	0.151	246	Plasma membrane	2.8	no	no
SPSC_00575	scaffold00006	39506	40026	1	no	0.114	90	Mitochondrial	9.9	no	no
SPSC_00576	scaffold00006	41814	43022	1	yes	0.861	402	Membrane bound Extracellular (Secreted)	9.3	yes	no
SPSC_00577	scaffold00006	47314	49611	1	yes	0.78	765	Plasma membrane	7.1	yes	yes
SPSC_00578	scaffold00006	50651	53890	-1	no	0.099	1079	Plasma membrane	9.8	no	no
SPSC_00579	scaffold00006	56541	58114	1	yes	0.929	454	Plasma membrane	8.1	yes	no
SPSC_00580	scaffold00006	58968	61739	1	no	0.119	923	Membrane bound Mitochondrial	9.7	no	no
SPSC_00581	scaffold00006	61994	62938	-1	no	0.123	314	Membrane bound Mitochondrial	7.2	no	no
SPSC_00582	scaffold00006	63396	64793	-1	yes	0.884	465	Membrane bound Lysosomal	8.2	yes	no
SPSC_00583	scaffold00006	65455	66921	1	no	0.121	488	Nuclear	3.5	no	no
SPSC_00584	scaffold00006	67325	69873	-1	no	0.359	759	Membrane bound Mitochondrial	2.7	no	no
SPSC_00585	scaffold00006	71086	72114	1	no	0.348	342	Plasma membrane	9.7	no	no
SPSC_00586	scaffold00006	72572	75661	-1	no	0.117	1029	Nuclear	5.8	no	no
SPSC_00587	scaffold00006	77698	80046	1	no	0.111	538	Cytoplasmic	6.7	no	no
SPSC_00588	scaffold00006	80876	82075	1	no	0.113	399	Cytoplasmic	3.5	no	no
SPSC_00589	scaffold00006	82231	84791	-1	no	0.108	599	Membrane bound Mitochondrial	3.7	no	no
SPSC_00590	scaffold00006	85284	88064	-1	no	0.132	926	Plasma membrane	4.3	no	no
SPSC_00591	scaffold00006	89525	90539	-1	no	0.169	307	Membrane bound Mitochondrial	4.8	no	no
SPSC_00592	scaffold00006	92044	98084	1	no	0.145	1976	Membrane bound Vacuolar	8	no	no
SPSC_00593	scaffold00006	98377	99273	-1	no	0.132	298	Membrane bound Mitochondrial	3.8	no	no
SPSC_00594	scaffold00006	99662	101605	1	no	0.124	647	Membrane bound Mitochondrial	7.7	no	no
SPSC_00595	scaffold00006	103779	107789	1	no	0.109	1336	Cytoplasmic	4.3	no	no
SPSC_00596	scaffold00006	108710	115138	-1	no	0.099	2142	Nuclear	3.8	no	no
SPSC_00597	scaffold00006	115661	116605	-1	no	0.129	314	Nuclear	6.2	no	no
SPSC_00598	scaffold00006	117527	120565	1	no	0.12	1012	Nuclear	6.9	no	no
SPSC_00599	scaffold00006	120650	122929	-1	no	0.157	759	Membrane bound Mitochondrial	9.4	no	no
SPSC_00600	scaffold00006	123376	125697	1	no	0.118	773	Cytoplasmic	4.3	no	no
SPSC_00601	scaffold00006	125995	126366	-1	no	0.098	123	Extracellular (Secreted)	6.1	yes	no
SPSC_00602	scaffold00006	127562	129391	-1	no	0.109	609	Nuclear	5.5	no	no
SPSC_00603	scaffold00006	130356	133115	1	no	0.13	919	Cytoplasmic	9.6	no	no
SPSC_00604	scaffold00006	133345	134010	-1	no	0.178	190	Membrane bound Mitochondrial	4.4	no	no
SPSC_00605	scaffold00006	135227	136015	1	no	0.168	262	Extracellular (Secreted)	4.3	yes	no
SPSC_00606	scaffold00006	136747	137121	1	no	0.122	124	Nuclear	7.3	no	no
SPSC_00607	scaffold00006	137418	138201	-1	no	0.121	221	Peroxisomal	5.5	no	no
SPSC_00608	scaffold00006	140826	142844	1	no	0.104	672	Nuclear	4.9	no	no
SPSC_00609	scaffold00006	143234	145768	-1	no	0.127	844	Nuclear	9.9	no	no
SPSC_00610	scaffold00006	146367	148139	-1	no	0.102	590	Plasma membrane	5.3	no	no
SPSC_00611	scaffold00006	148786	150173	-1	no	0.103	462	Peroxisomal	9.8	no	no
SPSC_00612	scaffold00006	151946	153010	1	no	0.108	354	Nuclear	4.1	no	no
SPSC_00613	scaffold00006	154065	156647	1	no	0.144	860	Nuclear	6.5	no	no
SPSC_00614	scaffold00006	156784	158223	-1	no	0.1	479	Nuclear	6.4	no	no
SPSC_00615	scaffold00006	158997	164033	1	no	0.108	1678	Membrane bound Vacuolar	9.4	no	no
SPSC_00616	scaffold00006	164470	167316	-1	no	0.107	948	Nuclear	5.5	no	no
SPSC_00617	scaffold00006	169046	171148	-1	no	0.1	700	Nuclear	5.5	no	no
SPSC_00618	scaffold00006	171775	172645	1	no	0.201	258	Membrane bound Mitochondrial	7.4	no	no
SPSC_00619	scaffold00006	173115	174929	1	yes	0.498	604	Membrane bound Mitochondrial	9.9	yes	no
SPSC_00620	scaffold00006	175026	176894	-1	no	0.139	622	Membrane bound Lysosomal	7.8	no	no
SPSC_00621	scaffold00006	178545	179576	-1	no	0.102	343	Membrane bound Mitochondrial	4	no	no
SPSC_00622	scaffold00006	179998	180394	1	no	0.115	103	Mitochondrial	9.9	no	no
SPSC_00623	scaffold00006	181137	182013	1	no	0.162	259	Nuclear	9.7	no	no
SPSC_00624	scaffold00006	182165	184045	-1	no	0.133	626	Cytoplasmic	3.9	no	no
SPSC_00625	scaffold00006	185692	187362	1	no	0.105	556	Nuclear	6.4	no	no
SPSC_00626	scaffold00006	193104	197045	1	no	0.109	1313	Plasma membrane	3.1	no	no
SPSC_00627	scaffold00006	197443	198491	1	no	0.184	266	Membrane bound Mitochondrial	7.7	no	no
SPSC_00628	scaffold00006	198581	199722	-1	no	0.243	319	Membrane bound Mitochondrial	6	no	no
SPSC_00629	scaffold00006	200767	205515	1	no	0.101	1333	Nuclear	3.5	no	no
SPSC_00630	scaffold00006	206284	207306	1	no	0.106	340	Cytoplasmic	3.6	no	no
SPSC_00631	scaffold00006	207443	208062	-1	no	0.104	151	Mitochondrial	3.3	no	no
SPSC_00632	scaffold00006	208643	210682	1	no	0.198	679	Nuclear	5.9	no	no
SPSC_00633	scaffold00006	211402	212241	1	no	0.105	279	Cytoplasmic	3.9	no	no
SPSC_00634	scaffold00006	212832	214075	-1	yes	0.52	189	Golgi	8.1	yes	no
SPSC_00635	scaffold00006	214713	215597	-1	no	0.209	294	Mitochondrial	8.6	no	no
SPSC_00636	scaffold00006	216102	217192	1	no	0.162	337	Membrane bound Extracellular (Secreted)	6	no	no
SPSC_00637	scaffold00006	217769	220135	1	no	0.1	788	Membrane bound Endoplasmic reticulum	5.7	no	no
SPSC_00638	scaffold00006	221269	222708	1	no	0.103	479	Plasma membrane	7.9	no	no
SPSC_00639	scaffold00006	223473	224656	1	yes	0.726	362	Plasma membrane	3.9	yes	yes
SPSC_00640	scaffold00006	224776	226084	-1	no	0.116	403	Cytoplasmic	3.3	no	no
SPSC_00641	scaffold00006	228595	229874	1	no	0.104	398	Cytoplasmic	10	no	no
SPSC_00642	scaffold00006	230508	231824	1	no	0.109	438	Membrane bound Mitochondrial	3.7	no	no
SPSC_00643	scaffold00006	232167	235256	-1	no	0.13	1029	Membrane bound Vacuolar	8.4	no	no
SPSC_00644	scaffold00006	236040	237947	1	no	0.107	635	Nuclear	5.8	no	no
SPSC_00645	scaffold00006	238373	241477	-1	yes	0.83	854	Plasma membrane	8.2	yes	no
SPSC_00646	scaffold00006	242140	243876	1	no	0.196	500	Membrane bound Mitochondrial	8.1	no	no
SPSC_00647	scaffold00006	244093	247125	-1	no	0.102	1010	Cytoplasmic	9.9	no	no
SPSC_00648	scaffold00006	248501	249844	1	no	0.102	447	Cytoplasmic	7.5	no	no
SPSC_00649	scaffold00006	250132	254703	1	no	0.109	1070	Cytoplasmic	3.3	no	no
SPSC_00650	scaffold00006	254986	255467	-1	no	0.151	126	Nuclear	9.9	no	no
SPSC_00651	scaffold00006	256311	257263	1	no	0.179	287	Nuclear	4.3	no	no
SPSC_00652	scaffold00006	257430	259898	-1	no	0.131	822	Nuclear	6	no	no
SPSC_00653	scaffold00006	260620	261411	-1	no	0.11	212	Nuclear	4.5	no	no
SPSC_00654	scaffold00006	269026	269397	-1	no	0.111	123	Vacuolar	5.5	no	no
SPSC_00655	scaffold00006	272444	273823	-1	no	0.156	377	Membrane bound Mitochondrial	9.9	no	no
SPSC_00656	scaffold00006	274564	276363	-1	no	0.181	426	Cytoplasmic	5.6	no	no
SPSC_00657	scaffold00006	277378	278628	-1	no	0.097	416	Cytoplasmic	10	no	no
SPSC_00658	scaffold00006	279212	280888	1	no	0.104	558	Cytoplasmic	8.7	no	no
SPSC_00659	scaffold00006	281018	283471	-1	no	0.101	817	Nuclear	5.3	no	no
SPSC_00660	scaffold00006	283841	287713	1	no	0.164	1290	Cytoplasmic	4.2	no	no
SPSC_00661	scaffold00006	288288	289990	-1	no	0.107	536	Membrane bound Vacuolar	7.7	no	no
SPSC_00662	scaffold00006	290525	291406	-1	no	0.106	237	Cytoplasmic	3.6	no	no
SPSC_00663	scaffold00006	292317	294353	1	no	0.119	678	Nuclear	6.2	no	no
SPSC_00664	scaffold00006	295082	297388	1	no	0.112	768	Nuclear	6.7	no	no
SPSC_00665	scaffold00006	297502	298740	-1	no	0.104	412	Cytoplasmic	3.6	no	no
SPSC_00666	scaffold00006	298937	299824	1	no	0.111	260	Cytoplasmic	5.5	no	no
SPSC_00667	scaffold00006	300038	301462	-1	no	0.111	474	Membrane bound Peroxisomal	6.5	no	no
SPSC_00668	scaffold00006	301828	303609	-1	no	0.132	593	Membrane bound Mitochondrial	5.3	no	no
SPSC_00669	scaffold00006	304328	304912	1	no	0.111	194	Nuclear	5.1	no	no
SPSC_00670	scaffold00006	305859	308801	-1	no	0.101	980	Membrane bound Endoplasmic reticulum	3.6	no	no
SPSC_00671	scaffold00006	309434	310339	1	no	0.172	301	Membrane bound Lysosomal	5.2	no	no
SPSC_00672	scaffold00006	311164	312505	1	no	0.118	128	Cytoplasmic	6.4	no	no
SPSC_00673	scaffold00006	315288	319043	1	no	0.104	1085	Cytoplasmic	3.8	no	no
SPSC_00674	scaffold00006	320001	321323	-1	no	0.102	440	Nuclear	7.4	no	no
SPSC_00675	scaffold00006	321839	323161	-1	yes	0.471	440	Membrane bound Mitochondrial	7	yes	yes
SPSC_00676	scaffold00006	323726	326036	-1	no	0.11	690	Nuclear	6.3	no	no
SPSC_00677	scaffold00006	328735	332817	1	no	0.117	1360	Cytoplasmic	4.2	no	no
SPSC_00678	scaffold00006	333211	333916	1	no	0.121	211	Extracellular (Secreted)	4.5	yes	no
SPSC_00679	scaffold00006	333996	335729	-1	no	0.123	577	Membrane bound Mitochondrial	7.6	no	no
SPSC_00680	scaffold00006	336002	337600	1	no	0.126	532	Membrane bound Mitochondrial	6.9	no	no
SPSC_00681	scaffold00006	337747	338595	-1	no	0.101	282	Nuclear	6.3	no	no
SPSC_00682	scaffold00006	339082	341367	1	no	0.106	761	Cytoplasmic	8	no	no
SPSC_00683	scaffold00006	341547	342422	-1	no	0.105	291	Extracellular (Secreted)	4.2	yes	no
SPSC_00684	scaffold00006	343658	347061	1	no	0.152	1134	Membrane bound Golgi	9.1	no	no
SPSC_00685	scaffold00006	347447	350062	1	no	0.15	871	Membrane bound Mitochondrial	8.7	no	no
SPSC_00686	scaffold00006	350154	351083	-1	no	0.106	309	Membrane bound Mitochondrial	7.3	no	no
SPSC_00687	scaffold00006	351777	354506	1	no	0.112	909	Plasma membrane	4.5	no	no
SPSC_00688	scaffold00006	354654	356030	-1	no	0.138	458	Cytoplasmic	10	no	no
SPSC_00689	scaffold00006	357763	359325	1	no	0.106	520	Membrane bound Lysosomal	3.9	no	no
SPSC_00690	scaffold00006	359595	360953	-1	no	0.173	452	Membrane bound Endoplasmic reticulum	7.2	no	no
SPSC_00691	scaffold00006	362763	363887	1	no	0.137	193	Cytoplasmic	9.2	no	no
SPSC_00692	scaffold00006	364644	365438	-1	no	0.121	264	Cytoplasmic	9.2	no	no
SPSC_00693	scaffold00006	366291	367615	1	no	0.108	282	Cytoplasmic	9.8	no	no
SPSC_00694	scaffold00006	369664	372714	1	no	0.108	1016	Nuclear	6.8	no	no
SPSC_00695	scaffold00006	372958	373614	1	no	0.1	218	Extracellular (Secreted)	3.6	yes	no
SPSC_00696	scaffold00006	374886	376169	1	no	0.172	427	Mitochondrial	9.5	no	no
SPSC_00697	scaffold00006	376559	379459	-1	no	0.157	966	Nuclear	7.6	no	no
SPSC_00698	scaffold00006	380424	381368	-1	no	0.142	314	Cytoplasmic	4.9	no	no
SPSC_00699	scaffold00006	381916	383805	1	no	0.102	629	Nuclear	7.5	no	no
SPSC_00700	scaffold00006	384457	385213	-1	no	0.104	89	Cytoplasmic	9.9	no	no
SPSC_00701	scaffold00006	386917	387374	1	no	0.114	109	Cytoplasmic	9.1	no	no
SPSC_00702	scaffold00006	389718	391211	1	no	0.1	497	Cytoplasmic	9.9	no	no
SPSC_00703	scaffold00006	391471	393879	-1	no	0.123	802	Nuclear	5.1	no	no
SPSC_00704	scaffold00006	395380	397017	1	no	0.105	545	Cytoplasmic	10	no	no
SPSC_00705	scaffold00006	397702	398268	1	no	0.107	188	Mitochondrial	4.4	no	no
SPSC_00706	scaffold00006	398539	400185	-1	no	0.096	548	Nuclear	5.7	no	no
SPSC_00707	scaffold00006	402326	403285	1	no	0.125	319	Membrane bound Mitochondrial	8.9	no	no
SPSC_00708	scaffold00006	404315	406570	1	no	0.202	751	Mitochondrial	9.9	no	no
SPSC_00709	scaffold00006	408019	410877	1	no	0.116	952	Plasma membrane	4.2	no	no
SPSC_00710	scaffold00006	411351	414392	-1	no	0.105	1013	Cytoplasmic	4.4	no	no
SPSC_00711	scaffold00006	415572	418404	1	no	0.137	751	Nuclear	3.5	no	no
SPSC_00712	scaffold00006	419580	421331	-1	no	0.12	583	Membrane bound Mitochondrial	6.8	no	no
SPSC_00713	scaffold00006	421854	423041	1	no	0.173	395	Membrane bound Mitochondrial	8.4	no	no
SPSC_00714	scaffold00006	423270	427505	-1	no	0.142	1411	Plasma membrane	3.5	no	no
SPSC_00715	scaffold00006	428709	430001	-1	yes	0.836	430	Membrane bound Extracellular (Secreted)	10	yes	no
SPSC_00716	scaffold00006	430898	432421	-1	yes	0.782	507	Mitochondrial	2.2	yes	yes
SPSC_00717	scaffold00006	433172	434836	1	no	0.107	554	Nuclear	7.3	no	no
SPSC_00718	scaffold00006	435085	437147	-1	no	0.101	623	Plasma membrane	4.6	no	no
SPSC_00719	scaffold00006	446035	451566	-1	no	0.107	1668	Nuclear	8.7	no	no
SPSC_00720	scaffold00006	454903	457857	1	no	0.114	984	Plasma membrane	6.8	no	no
SPSC_00721	scaffold00006	457993	458297	-1	no	0.105	71	Extracellular (Secreted)	7.5	yes	no
SPSC_00722	scaffold00006	459199	460977	1	no	0.106	592	Cytoplasmic	8.1	no	no
SPSC_00723	scaffold00006	461306	463423	-1	no	0.113	705	Membrane bound Peroxisomal	9	no	no
SPSC_00724	scaffold00006	466452	470060	1	yes	0.903	1202	Plasma membrane	5.3	yes	yes
SPSC_00725	scaffold00006	470365	474138	-1	yes	0.458	1257	Cytoplasmic	3.2	yes	yes
SPSC_00726	scaffold00006	475898	479676	-1	no	0.113	984	Plasma membrane	2.4	no	no
SPSC_00727	scaffold00006	480667	483709	-1	no	0.174	685	Membrane bound Mitochondrial	9.9	no	no
SPSC_00728	scaffold00006	484545	485386	1	no	0.259	153	Mitochondrial	9.9	no	no
SPSC_00729	scaffold00006	485674	486022	-1	no	0.102	88	Nuclear	5.2	no	no
SPSC_00730	scaffold00006	487516	488448	-1	no	0.193	226	Membrane bound Mitochondrial	2.6	no	no
SPSC_00731	scaffold00006	489114	489863	-1	no	0.101	249	Nuclear	4.6	no	no
SPSC_00732	scaffold00006	490372	490944	1	no	0.109	190	Membrane bound Mitochondrial	6.1	no	no
SPSC_00733	scaffold00006	491473	493554	1	no	0.115	693	Nuclear	4.4	no	no
SPSC_00734	scaffold00006	497424	498359	-1	no	0.143	311	Cytoplasmic	8.4	no	no
SPSC_00735	scaffold00006	499483	503454	-1	no	0.114	1323	Plasma membrane	3.5	no	no
SPSC_00736	scaffold00006	504298	506955	-1	no	0.113	885	Membrane bound Mitochondrial	5.6	no	no
SPSC_00737	scaffold00006	507728	508840	1	no	0.165	370	Nuclear	8.4	no	no
SPSC_00738	scaffold00006	509696	511033	1	no	0.156	445	Extracellular (Secreted)	4.8	yes	no
SPSC_00739	scaffold00006	511175	513388	-1	no	0.236	737	Membrane bound Mitochondrial	10	no	no
SPSC_00740	scaffold00006	514065	515636	-1	no	0.104	523	Nuclear	5.9	no	no
SPSC_00741	scaffold00006	523057	524361	1	no	0.101	434	Nuclear	8.3	no	no
SPSC_00742	scaffold00006	524496	526535	-1	no	0.43	679	Mitochondrial	7.8	no	no
SPSC_00743	scaffold00006	527708	529660	1	no	0.235	650	Membrane bound Mitochondrial	9.2	no	no
SPSC_00744	scaffold00006	529870	533337	-1	no	0.13	1155	Cytoplasmic	3.3	no	no
SPSC_00745	scaffold00006	534053	535015	1	no	0.187	285	Cytoplasmic	2.4	no	no
SPSC_00746	scaffold00006	535230	535916	-1	no	0.13	228	Nuclear	3.6	no	no
SPSC_00747	scaffold00006	536567	539279	1	no	0.104	865	Nuclear	3.3	no	no
SPSC_00748	scaffold00006	539414	541930	-1	no	0.186	838	Cytoplasmic	9.8	no	no
SPSC_00749	scaffold00006	542349	542789	1	no	0.101	111	Nuclear	9.7	no	no
SPSC_00750	scaffold00006	544110	544704	1	yes	0.578	168	Membrane bound Extracellular (Secreted)	6.2	yes	yes
SPSC_00751	scaffold00006	545098	545943	-1	no	0.104	220	Nuclear	8.6	no	no
SPSC_00752	scaffold00006	546923	550492	-1	no	0.11	1189	Membrane bound Endoplasmic reticulum	8.4	no	no
SPSC_00753	scaffold00006	552061	553722	-1	no	0.1	441	Extracellular (Secreted)	5.1	yes	no
SPSC_00754	scaffold00006	555665	556646	-1	no	0.106	207	Membrane bound Mitochondrial	8.9	no	no
SPSC_00755	scaffold00006	557744	558496	-1	no	0.098	250	Membrane bound Mitochondrial	2.5	no	no
SPSC_00756	scaffold00006	559422	560444	1	no	0.159	340	Nuclear	9	no	no
SPSC_00757	scaffold00006	560735	563161	-1	no	0.105	774	Nuclear	8.6	no	no
SPSC_00758	scaffold00006	568242	574958	-1	no	0.105	2238	Nuclear	5.1	no	no
SPSC_00759	scaffold00006	580707	583679	1	no	0.148	990	Plasma membrane	8.8	no	no
SPSC_00760	scaffold00006	583975	585239	-1	no	0.12	264	Cytoplasmic	8.3	no	no
SPSC_00761	scaffold00006	585685	586641	1	no	0.134	318	Membrane bound Mitochondrial	6.1	no	no
SPSC_00762	scaffold00006	586813	588740	-1	no	0.101	616	Cytoplasmic	9.6	no	no
SPSC_00763	scaffold00006	589256	589948	1	no	0.101	125	Mitochondrial	7.3	no	no
SPSC_00764	scaffold00006	590236	590872	-1	no	0.102	78	Mitochondrial	9.8	no	no
SPSC_00765	scaffold00006	591207	592289	1	no	0.107	360	Nuclear	9.8	no	no
SPSC_00766	scaffold00006	592562	596359	-1	no	0.115	1265	Plasma membrane	7.4	no	no
SPSC_00767	scaffold00006	600149	600922	-1	no	0.112	257	Nuclear	4.3	no	no
SPSC_00768	scaffold00006	602026	603327	1	no	0.116	433	Cytoplasmic	8.9	no	no
SPSC_00769	scaffold00006	603568	606345	-1	no	0.111	925	Plasma membrane	9.8	no	no
SPSC_00770	scaffold00006	607289	609004	1	no	0.116	571	Nuclear	9.9	no	no
SPSC_00771	scaffold00006	609184	610749	-1	no	0.099	521	Nuclear	4.3	no	no
SPSC_00772	scaffold00006	614205	618113	1	no	0.11	1302	Cytoplasmic	3.4	no	no
SPSC_00773	scaffold00006	618938	619396	-1	no	0.106	152	Nuclear	5	no	no
SPSC_00774	scaffold00006	619951	622533	-1	no	0.102	860	Nuclear	5.9	no	no
SPSC_00775	scaffold00006	623610	625466	1	no	0.104	618	Nuclear	9.9	no	no
SPSC_00776	scaffold00006	625614	628934	-1	no	0.194	1106	Cytoplasmic	4	no	no
SPSC_00777	scaffold00006	629189	631183	1	no	0.097	664	Nuclear	9.9	no	no
SPSC_00778	scaffold00006	631460	632476	-1	no	0.128	338	Mitochondrial	6.2	no	no
SPSC_00779	scaffold00006	632877	633944	1	no	0.132	355	Mitochondrial	3.1	no	no
SPSC_00780	scaffold00006	634080	635831	-1	no	0.193	583	Membrane bound Endoplasmic reticulum	9.1	no	no
SPSC_00781	scaffold00006	636325	638325	-1	no	0.103	666	Nuclear	6.3	no	no
SPSC_00782	scaffold00006	640529	642028	1	no	0.104	499	Membrane bound Mitochondrial	5.4	no	no
SPSC_00783	scaffold00006	642203	643861	-1	no	0.132	552	Nuclear	3	no	no
SPSC_00784	scaffold00006	644121	645200	-1	no	0.123	359	Nuclear	2.9	no	no
SPSC_00785	scaffold00006	646263	648101	1	no	0.158	612	Membrane bound Mitochondrial	7.6	no	no
SPSC_00786	scaffold00006	649542	650627	1	no	0.1	361	Cytoplasmic	3	no	no
SPSC_00787	scaffold00006	652248	653697	1	no	0.133	407	Membrane bound Mitochondrial	9.9	no	no
SPSC_00788	scaffold00006	654696	655307	-1	yes	0.574	203	Membrane bound Mitochondrial	3	yes	yes
SPSC_00789	scaffold00006	655736	656848	1	no	0.127	336	Cytoplasmic	4.1	no	no
SPSC_00790	scaffold00006	657097	658908	-1	no	0.254	603	Membrane bound Mitochondrial	5.2	no	no
SPSC_00791	scaffold00006	665185	666642	1	no	0.119	485	Nuclear	4.6	no	no
SPSC_00792	scaffold00006	667271	668306	1	no	0.123	213	Nuclear	5.5	no	no
SPSC_00793	scaffold00006	668384	671128	-1	no	0.276	914	Membrane bound Mitochondrial	8.2	no	no
SPSC_00794	scaffold00006	671552	673453	1	no	0.103	633	Plasma membrane	2.9	no	no
SPSC_00795	scaffold00006	674274	674969	-1	yes	0.828	193	Extracellular (Secreted)	9.7	yes	yes
SPSC_00796	scaffold00006	675532	677562	1	no	0.109	605	Nuclear	6.3	no	no
SPSC_00797	scaffold00006	678046	681513	-1	no	0.104	1155	Cytoplasmic	6.9	no	no
SPSC_00798	scaffold00006	682391	683430	1	no	0.151	316	Cytoplasmic	7	no	no
SPSC_00799	scaffold00006	683773	687378	-1	no	0.104	1201	Cytoplasmic	7.3	no	no
SPSC_00800	scaffold00006	687967	689241	1	no	0.155	424	Membrane bound Endoplasmic reticulum	9.5	no	no
SPSC_00801	scaffold00006	689398	690447	-1	no	0.098	349	Cytoplasmic	5.7	no	no
SPSC_00802	scaffold00006	690854	691543	1	no	0.106	174	Mitochondrial	6.3	no	no
SPSC_00803	scaffold00006	691759	693180	-1	no	0.121	473	Membrane bound Mitochondrial	7.8	no	no
SPSC_00804	scaffold00006	693529	694845	1	no	0.166	438	Membrane bound Golgi	8.6	no	no
SPSC_00805	scaffold00006	697096	698315	1	yes	0.788	374	Plasma membrane	3.9	yes	yes
SPSC_00806	scaffold00006	698846	699823	1	no	0.129	242	Mitochondrial	4.1	no	no
SPSC_00807	scaffold00006	700009	701583	-1	yes	0.75	445	Membrane bound Lysosomal	4.5	yes	yes
SPSC_00808	scaffold00006	702787	703611	-1	yes	0.459	274	Membrane bound Mitochondrial	9.2	yes	no
SPSC_00809	scaffold00006	703920	705029	-1	no	0.124	369	Nuclear	5.2	no	no
SPSC_00810	scaffold00006	705645	706838	1	no	0.117	397	Cytoplasmic	8.5	no	no
SPSC_00811	scaffold00006	707170	707872	-1	no	0.104	207	Mitochondrial	8.9	no	no
SPSC_00812	scaffold00006	708757	709788	1	no	0.106	343	Nuclear	5.3	no	no
SPSC_00813	scaffold00006	710078	712315	1	no	0.154	745	Nuclear	4.9	no	no
SPSC_00814	scaffold00006	712452	713513	-1	no	0.111	353	Cytoplasmic	5.3	no	no
SPSC_00815	scaffold00006	714240	718598	1	no	0.103	1452	Membrane bound Lysosomal	3	no	no
SPSC_00816	scaffold00006	718710	719652	-1	no	0.108	282	Cytoplasmic	4.3	no	no
SPSC_00817	scaffold00006	720021	721301	1	no	0.431	426	Cytoplasmic	3.8	no	no
SPSC_00818	scaffold00006	721700	725350	1	no	0.104	1216	Cytoplasmic	4.7	no	no
SPSC_00819	scaffold00006	726315	729107	1	yes	0.944	930	Plasma membrane	3.3	yes	yes
SPSC_00820	scaffold00006	729273	730529	-1	no	0.135	418	Cytoplasmic	4	no	no
SPSC_00821	scaffold00006	732872	735469	1	no	0.122	865	Mitochondrial	9.8	no	no
SPSC_00822	scaffold00006	735908	738505	1	no	0.103	865	Nuclear	5.8	no	no
SPSC_00823	scaffold00006	739196	740090	1	no	0.138	270	Cytoplasmic	10	no	no
SPSC_00824	scaffold00006	740480	741364	1	no	0.141	294	Mitochondrial	5	no	no
SPSC_00825	scaffold00006	742503	743789	1	no	0.151	428	Nuclear	9.8	no	no
SPSC_00826	scaffold00006	744083	744815	-1	no	0.104	220	Nuclear	4.3	no	no
SPSC_00827	scaffold00006	745220	746419	1	no	0.241	399	Plasma membrane	5.3	no	no
SPSC_00828	scaffold00006	746643	748206	-1	no	0.11	217	Cytoplasmic	4	no	no
SPSC_00829	scaffold00006	748354	749917	1	no	0.117	520	Plasma membrane	9.3	no	no
SPSC_00830	scaffold00006	750222	753626	-1	no	0.137	1086	Cytoplasmic	5.3	no	no
SPSC_00831	scaffold00006	755435	757282	-1	no	0.099	615	Nuclear	6.3	no	no
SPSC_00832	scaffold00006	765869	782226	-1	no	0.123	5421	Membrane bound Extracellular (Secreted)	3.8	no	no
SPSC_00833	scaffold00006	782769	783337	1	no	0.192	129	Nuclear	9.6	no	no
SPSC_00834	scaffold00006	783484	785739	-1	no	0.159	751	Cytoplasmic	9.4	no	no
SPSC_00835	scaffold00006	786262	787662	-1	no	0.11	466	Nuclear	4.9	no	no
SPSC_00836	scaffold00006	788958	789707	1	no	0.099	92	Cytoplasmic	5.8	no	no
SPSC_00837	scaffold00006	790269	791228	1	no	0.109	319	Cytoplasmic	3.5	no	no
SPSC_00838	scaffold00006	792467	793586	-1	no	0.17	291	Membrane bound Mitochondrial	9.7	no	no
SPSC_00839	scaffold00006	795600	797324	-1	no	0.103	536	Cytoplasmic	3.8	no	no
SPSC_00840	scaffold00006	801451	805578	-1	no	0.114	1134	Nuclear	3.5	no	no
SPSC_00841	scaffold00006	807313	808459	1	no	0.111	350	Membrane bound Extracellular (Secreted)	9.5	no	no
SPSC_00842	scaffold00006	808738	811273	-1	no	0.119	806	Cytoplasmic	4.1	no	no
SPSC_00843	scaffold00007	2335	3321	1	yes	0.796	328	Membrane bound Extracellular (Secreted)	9.8	yes	no
SPSC_00844	scaffold00007	4027	6492	1	no	0.106	821	Nuclear	9.9	no	no
SPSC_00845	scaffold00007	6673	10218	-1	no	0.11	1181	Membrane bound Mitochondrial	6.5	no	no
SPSC_00846	scaffold00007	10707	12822	-1	no	0.119	637	Cytoplasmic	7.9	no	no
SPSC_00847	scaffold00007	14290	16143	1	no	0.106	617	Nuclear	5.6	no	no
SPSC_00848	scaffold00007	16499	17106	-1	no	0.098	139	Cytoplasmic	9.4	no	no
SPSC_00849	scaffold00007	22973	24829	1	no	0.115	618	Nuclear	5.7	no	no
SPSC_00850	scaffold00007	25432	27303	1	yes	0.695	623	Membrane bound Extracellular (Secreted)	3.1	yes	yes
SPSC_00851	scaffold00007	27596	30628	-1	no	0.111	1010	Plasma membrane	6.8	no	no
SPSC_00852	scaffold00007	31354	32999	-1	no	0.1	476	Cytoplasmic	7.7	no	no
SPSC_00853	scaffold00007	34791	35834	1	no	0.107	347	Cytoplasmic	9.9	no	no
SPSC_00854	scaffold00007	36616	37194	-1	no	0.107	192	Extracellular (Secreted)	9.3	yes	yes
SPSC_00855	scaffold00007	39156	43055	-1	no	0.1	1299	Cytoplasmic	3.9	no	no
SPSC_00856	scaffold00007	47272	50096	1	no	0.102	899	Cytoplasmic	9.6	no	no
SPSC_00857	scaffold00007	50602	52596	-1	no	0.129	664	Nuclear	3.9	no	no
SPSC_00858	scaffold00007	54772	56256	-1	no	0.121	494	Nuclear	4.1	no	no
SPSC_00859	scaffold00007	57114	62399	1	no	0.104	1761	Nuclear	4.5	no	no
SPSC_00860	scaffold00007	63243	64430	1	no	0.104	395	Nuclear	4.7	no	no
SPSC_00861	scaffold00007	64729	65184	-1	yes	0.826	96	Plasma membrane	8	yes	no
SPSC_00862	scaffold00007	65896	66357	-1	no	0.148	153	Membrane bound Mitochondrial	9.3	no	no
SPSC_00863	scaffold00007	66756	67616	1	no	0.292	286	Cytoplasmic	2.8	no	no
SPSC_00864	scaffold00007	71496	73211	1	no	0.102	571	Membrane bound Vacuolar	3	no	no
SPSC_00865	scaffold00007	73485	74504	-1	no	0.105	339	Cytoplasmic	9.6	no	no
SPSC_00866	scaffold00007	74876	78151	1	no	0.14	1091	Membrane bound Mitochondrial	6.4	no	no
SPSC_00867	scaffold00007	78549	78921	-1	no	0.109	96	Nuclear	5.4	no	no
SPSC_00868	scaffold00007	80033	85001	1	no	0.101	1621	Plasma membrane	7.9	no	no
SPSC_00869	scaffold00007	85438	86752	-1	no	0.117	405	Membrane bound Mitochondrial	9.3	no	no
SPSC_00870	scaffold00007	87368	88023	1	no	0.102	135	Mitochondrial	9.5	no	no
SPSC_00871	scaffold00007	88347	90525	-1	no	0.104	639	Cytoplasmic	3.6	no	no
SPSC_00872	scaffold00007	93716	95586	1	no	0.115	592	Nuclear	5.3	no	no
SPSC_00873	scaffold00007	96251	97841	1	no	0.107	476	Membrane bound Mitochondrial	7.2	no	no
SPSC_00874	scaffold00007	98144	99771	-1	no	0.103	301	Cytoplasmic	4.7	no	no
SPSC_00875	scaffold00007	101929	103635	1	no	0.138	568	Cytoplasmic	7.8	no	no
SPSC_00876	scaffold00007	104822	108205	-1	yes	0.885	1093	Nuclear	5.5	yes	yes
SPSC_00877	scaffold00007	109551	111008	1	yes	0.846	485	Nuclear	5.3	yes	yes
SPSC_00878	scaffold00007	111916	114012	1	no	0.318	698	Membrane bound Mitochondrial	7.9	no	no
SPSC_00879	scaffold00007	115180	115957	-1	no	0.103	121	Extracellular (Secreted)	3.4	yes	no
SPSC_00880	scaffold00007	116738	120397	1	no	0.17	1219	Cytoplasmic	2.9	no	no
SPSC_00881	scaffold00007	121387	123810	-1	no	0.099	807	Plasma membrane	6	no	no
SPSC_00882	scaffold00007	127336	129624	-1	no	0.115	762	Cytoplasmic	9.1	no	no
SPSC_00883	scaffold00007	130176	132179	1	no	0.115	667	Plasma membrane	6.8	no	no
SPSC_00884	scaffold00007	132321	138413	-1	no	0.103	2030	Cytoplasmic	4	no	no
SPSC_00885	scaffold00007	139070	139723	-1	no	0.102	217	Cytoplasmic	4.4	no	no
SPSC_00886	scaffold00007	140161	140556	-1	no	0.105	131	Nuclear	5.9	no	no
SPSC_00887	scaffold00007	141180	142622	-1	no	0.204	480	Membrane bound Endoplasmic reticulum	6.1	no	no
SPSC_00888	scaffold00007	144830	148429	1	yes	0.752	1199	Plasma membrane	3.9	yes	yes
SPSC_00889	scaffold00007	148959	152234	1	yes	0.85	1091	Plasma membrane	5	yes	yes
SPSC_00890	scaffold00007	152618	161887	1	no	0.104	3089	Membrane bound Mitochondrial	5.3	no	no
SPSC_00891	scaffold00007	162136	163965	-1	no	0.115	609	Plasma membrane	8.1	no	no
SPSC_00892	scaffold00007	165629	167377	1	no	0.107	582	Membrane bound Endoplasmic reticulum	7.3	no	no
SPSC_00893	scaffold00007	167824	170635	-1	no	0.108	612	Membrane bound Mitochondrial	5.4	no	no
SPSC_00894	scaffold00007	176395	180253	1	no	0.137	1016	Cytoplasmic	4.4	no	no
SPSC_00895	scaffold00007	181014	183269	1	no	0.102	751	Nuclear	6.8	no	no
SPSC_00896	scaffold00007	184093	186945	1	no	0.342	950	Membrane bound Mitochondrial	8.3	no	no
SPSC_00897	scaffold00007	187603	189186	-1	yes	0.774	527	Membrane bound Extracellular (Secreted)	7.6	yes	yes
SPSC_00898	scaffold00007	191174	192883	1	no	0.154	543	Cytoplasmic	3.6	no	no
SPSC_00899	scaffold00007	194614	196135	-1	no	0.134	254	Cytoplasmic	3.3	no	no
SPSC_00900	scaffold00007	197039	198423	-1	no	0.118	335	Membrane bound Mitochondrial	8.2	no	no
SPSC_00901	scaffold00007	199878	204208	1	no	0.106	1350	Plasma membrane	5.4	no	no
SPSC_00902	scaffold00007	205850	208282	1	yes	0.768	810	Nuclear	4.3	yes	yes
SPSC_00903	scaffold00007	208725	210401	-1	no	0.131	558	Plasma membrane	9	no	no
SPSC_00904	scaffold00007	212274	213533	1	no	0.101	419	Cytoplasmic	3.5	no	no
SPSC_00905	scaffold00007	213697	215610	-1	no	0.101	637	Cytoplasmic	9.9	no	no
SPSC_00906	scaffold00007	216384	221132	1	no	0.108	1582	Membrane bound Endoplasmic reticulum	7.5	no	no
SPSC_00907	scaffold00007	221249	221878	-1	no	0.327	209	Membrane bound Extracellular (Secreted)	7.9	no	no
SPSC_00908	scaffold00007	222143	223342	1	no	0.172	399	Cytoplasmic	4	no	no
SPSC_00909	scaffold00007	223958	225672	1	no	0.289	571	Membrane bound Endoplasmic reticulum	9.8	no	no
SPSC_00910	scaffold00007	225866	227725	-1	no	0.107	619	Nuclear	4.4	no	no
SPSC_00911	scaffold00007	228099	231170	-1	no	0.14	1023	Plasma membrane	6.7	no	no
SPSC_00912	scaffold00007	232429	233712	1	no	0.192	402	Membrane bound Mitochondrial	7.6	no	no
SPSC_00913	scaffold00007	233769	235499	-1	no	0.106	576	Cytoplasmic	3.6	no	no
SPSC_00914	scaffold00007	236103	237418	1	no	0.144	402	Membrane bound Mitochondrial	4.3	no	no
SPSC_00915	scaffold00007	238339	240723	1	no	0.114	794	Membrane bound Endoplasmic reticulum	8	no	no
SPSC_00916	scaffold00007	241965	248137	1	no	0.104	2024	Nuclear	6.7	no	no
SPSC_00917	scaffold00007	248690	250963	1	no	0.175	757	Membrane bound Mitochondrial	9.9	no	no
SPSC_00918	scaffold00007	251387	252067	-1	yes	0.869	226	Plasma membrane	10	yes	no
SPSC_00919	scaffold00007	252587	252937	1	no	0.104	116	Mitochondrial	9.9	no	no
SPSC_00920	scaffold00007	253258	254091	-1	no	0.129	277	Nuclear	5.7	no	no
SPSC_00921	scaffold00007	254676	256778	-1	no	0.274	700	Plasma membrane	8.2	no	no
SPSC_00922	scaffold00007	258633	260361	1	no	0.135	575	Plasma membrane	6.2	no	no
SPSC_00923	scaffold00007	261595	262536	-1	no	0.372	211	Membrane bound Endoplasmic reticulum	9.8	no	no
SPSC_00924	scaffold00007	263016	264332	-1	no	0.126	438	Membrane bound Mitochondrial	8.6	no	no
SPSC_00925	scaffold00007	264702	268349	-1	no	0.105	1215	Cytoplasmic	6.5	no	no
SPSC_00926	scaffold00007	268937	270106	-1	no	0.11	389	Nuclear	5.6	no	no
SPSC_00927	scaffold00007	270755	273355	-1	no	0.122	866	Membrane bound Mitochondrial	6.6	no	no
SPSC_00928	scaffold00007	276013	282045	1	no	0.118	2010	Cytoplasmic	4.2	no	no
SPSC_00929	scaffold00007	282385	284250	1	no	0.153	621	Membrane bound Mitochondrial	3.5	no	no
SPSC_00930	scaffold00007	284555	288277	-1	no	0.115	1240	Cytoplasmic	7.2	no	no
SPSC_00931	scaffold00007	288807	292985	-1	no	0.103	1392	Plasma membrane	10	no	no
SPSC_00932	scaffold00007	293560	294537	1	no	0.104	325	Nuclear	5.4	no	no
SPSC_00933	scaffold00007	294751	296595	-1	no	0.347	614	Nuclear	2.7	no	no
SPSC_00934	scaffold00007	297538	300401	-1	no	0.121	924	Cytoplasmic	6.9	no	no
SPSC_00935	scaffold00007	301738	303873	-1	no	0.115	711	Nuclear	5.4	no	no
SPSC_00936	scaffold00007	305041	306107	-1	no	0.195	320	Membrane bound Mitochondrial	9.9	no	no
SPSC_00937	scaffold00007	309225	310844	1	yes	0.843	539	Membrane bound Extracellular (Secreted)	5	yes	yes
SPSC_00938	scaffold00007	316365	318032	-1	no	0.099	555	Cytoplasmic	9.7	no	no
SPSC_00939	scaffold00007	318406	320618	-1	no	0.202	709	Membrane bound Mitochondrial	9.7	no	no
SPSC_00940	scaffold00007	321561	325844	-1	no	0.16	1427	Cytoplasmic	7.2	no	no
SPSC_00941	scaffold00007	326859	329003	-1	no	0.102	687	Nuclear	5.7	no	no
SPSC_00942	scaffold00007	329339	332524	-1	yes	0.831	1061	Plasma membrane	6	yes	yes
SPSC_00943	scaffold00007	332809	333804	1	no	0.286	331	Cytoplasmic	9.8	no	no
SPSC_00944	scaffold00007	334066	338328	-1	yes	0.607	1420	Plasma membrane	5.4	yes	yes
SPSC_00945	scaffold00007	340645	342411	-1	no	0.102	588	Plasma membrane	9.5	no	no
SPSC_00946	scaffold00007	344044	346503	-1	no	0.107	819	Nuclear	9.1	no	no
SPSC_00947	scaffold00007	348787	350841	1	no	0.12	684	Nuclear	6.2	no	no
SPSC_00948	scaffold00007	351856	356034	-1	no	0.106	1392	Cytoplasmic	3.8	no	no
SPSC_00949	scaffold00007	356561	357325	-1	no	0.129	226	Nuclear	5.7	no	no
SPSC_00950	scaffold00007	358239	359399	1	no	0.169	386	Membrane bound Mitochondrial	3	no	no
SPSC_00951	scaffold00007	359549	361225	-1	no	0.105	558	Nuclear	9.8	no	no
SPSC_00952	scaffold00007	361719	363395	1	no	0.102	558	Membrane bound Mitochondrial	4.1	no	no
SPSC_00953	scaffold00007	363816	364636	-1	no	0.122	218	Mitochondrial	9.7	no	no
SPSC_00954	scaffold00007	365329	367317	-1	no	0.123	662	Nuclear	3.3	no	no
SPSC_00955	scaffold00007	369011	370378	1	no	0.14	455	Membrane bound Mitochondrial	7.9	no	no
SPSC_00956	scaffold00007	370527	371444	-1	no	0.122	305	Nuclear	4.9	no	no
SPSC_00957	scaffold00007	372308	373135	1	no	0.142	275	Plasma membrane	4.9	no	no
SPSC_00958	scaffold00007	373446	375683	-1	yes	0.745	745	Membrane bound Extracellular (Secreted)	9.3	yes	no
SPSC_00959	scaffold00007	378303	381833	1	no	0.147	1176	Plasma membrane	7.2	no	no
SPSC_00960	scaffold00007	382059	382646	-1	no	0.192	195	Cytoplasmic	8.3	no	no
SPSC_00961	scaffold00007	383249	384253	1	no	0.204	302	Plasma membrane	9	no	no
SPSC_00962	scaffold00007	384847	386100	1	no	0.132	417	Membrane bound Mitochondrial	7.4	no	no
SPSC_00963	scaffold00007	386388	388718	-1	no	0.107	776	Nuclear	5.1	no	no
SPSC_00964	scaffold00007	389266	390179	-1	no	0.131	218	Mitochondrial	9.6	no	no
SPSC_00965	scaffold00007	390609	391907	1	no	0.118	432	Cytoplasmic	3.3	no	no
SPSC_00966	scaffold00007	392309	393163	1	no	0.116	284	Cytoplasmic	8.5	no	no
SPSC_00967	scaffold00007	394051	397881	-1	no	0.117	1276	Cytoplasmic	8.5	no	no
SPSC_00968	scaffold00007	400018	402189	-1	no	0.115	659	Plasma membrane	6.9	no	no
SPSC_00969	scaffold00007	404239	405801	-1	yes	0.774	520	Membrane bound Extracellular (Secreted)	5.9	yes	yes
SPSC_00970	scaffold00007	410322	412862	-1	no	0.103	619	Membrane bound Endoplasmic reticulum	5.8	no	no
SPSC_00971	scaffold00007	413782	414870	1	no	0.175	362	Mitochondrial	8.6	no	no
SPSC_00972	scaffold00007	415101	419460	-1	no	0.172	1452	Plasma membrane	8.8	no	no
SPSC_00973	scaffold00007	420900	422481	-1	no	0.104	487	Nuclear	5.5	no	no
SPSC_00974	scaffold00007	431893	433137	1	no	0.143	350	Membrane bound Endoplasmic reticulum	9.4	no	no
SPSC_00975	scaffold00007	433382	435133	-1	no	0.117	583	Cytoplasmic	10	no	no
SPSC_00976	scaffold00007	435830	443806	1	no	0.104	2658	Membrane bound Mitochondrial	6	no	no
SPSC_00977	scaffold00007	444559	445714	1	no	0.176	357	Membrane bound Mitochondrial	7.2	no	no
SPSC_00978	scaffold00007	446144	448792	1	no	0.114	882	Membrane bound Endoplasmic reticulum	8.1	no	no
SPSC_00979	scaffold00007	448994	449807	-1	no	0.135	149	Nuclear	7.2	no	no
SPSC_00980	scaffold00007	450343	452139	1	no	0.1	598	Nuclear	6.6	no	no
SPSC_00981	scaffold00007	453647	457150	1	no	0.111	1167	Cytoplasmic	7.4	no	no
SPSC_00982	scaffold00007	457675	458466	1	no	0.101	263	Cytoplasmic	5.8	no	no
SPSC_00983	scaffold00007	460017	460604	-1	no	0.154	195	Mitochondrial	9.5	no	no
SPSC_00984	scaffold00007	461478	462860	1	no	0.122	460	Plasma membrane	4.9	no	no
SPSC_00985	scaffold00007	463023	464447	-1	no	0.112	474	Membrane bound Mitochondrial	4	no	no
SPSC_00986	scaffold00007	465298	466764	1	no	0.235	488	Plasma membrane	3.9	no	no
SPSC_00987	scaffold00007	467541	470660	-1	no	0.194	1039	Membrane bound Mitochondrial	10	no	no
SPSC_00988	scaffold00007	475538	479851	1	no	0.135	1437	Cytoplasmic	7.8	no	no
SPSC_00989	scaffold00007	480027	480962	-1	no	0.111	311	Nuclear	7.3	no	no
SPSC_00990	scaffold00007	481388	482200	1	yes	0.639	151	Endoplasmic reticulum	6.9	yes	yes
SPSC_00991	scaffold00007	482322	483542	-1	no	0.144	406	Membrane bound Endoplasmic reticulum	5.6	no	no
SPSC_00992	scaffold00007	485046	485645	1	no	0.156	199	Plasma membrane	4	no	no
SPSC_00993	scaffold00007	486057	487130	1	no	0.348	357	Extracellular (Secreted)	4.5	yes	no
SPSC_00994	scaffold00007	487251	488489	-1	no	0.108	366	Cytoplasmic	10	no	no
SPSC_00995	scaffold00007	488990	489595	1	no	0.109	161	Nuclear	7.5	no	no
SPSC_00996	scaffold00007	490315	493455	1	no	0.102	1046	Membrane bound Golgi	7.9	no	no
SPSC_00997	scaffold00007	493869	496463	1	no	0.104	864	Nuclear	5.4	no	no
SPSC_00998	scaffold00007	496652	497815	-1	yes	0.624	387	Membrane bound Endoplasmic reticulum	6.1	yes	yes
SPSC_00999	scaffold00007	499055	502543	1	no	0.1	1162	Cytoplasmic	4.2	no	no
SPSC_01000	scaffold00007	503396	505851	1	no	0.111	792	Nuclear	5.9	no	no
SPSC_01001	scaffold00007	506015	506968	-1	no	0.176	317	Membrane bound Mitochondrial	3.7	no	no
SPSC_01002	scaffold00007	507290	507901	-1	no	0.1	203	Membrane bound Mitochondrial	3.1	no	no
SPSC_01003	scaffold00007	510381	513443	1	no	0.103	1020	Cytoplasmic	7.2	no	no
SPSC_01004	scaffold00007	515436	518423	1	no	0.101	995	Nuclear	6.8	no	no
SPSC_01005	scaffold00007	518929	519450	-1	no	0.115	173	Cytoplasmic	2.6	no	no
SPSC_01006	scaffold00007	519909	521159	-1	no	0.113	416	Nuclear	6.7	no	no
SPSC_01007	scaffold00007	521648	525631	1	no	0.109	1327	Nuclear	6.2	no	no
SPSC_01008	scaffold00007	529130	530194	1	no	0.101	354	Plasma membrane	4.5	no	no
SPSC_01009	scaffold00007	532288	534864	1	no	0.108	858	Plasma membrane	7.4	no	no
SPSC_01010	scaffold00007	535367	536311	1	no	0.184	314	Membrane bound Mitochondrial	9.5	no	no
SPSC_01011	scaffold00007	536630	543430	-1	no	0.136	2233	Membrane bound Endoplasmic reticulum	4.7	no	no
SPSC_01012	scaffold00007	546074	547783	1	no	0.101	569	Plasma membrane	9.4	no	no
SPSC_01013	scaffold00007	548055	549834	-1	no	0.107	566	Membrane bound Mitochondrial	8.3	no	no
SPSC_01014	scaffold00007	551630	552760	-1	no	0.102	338	Cytoplasmic	8.4	no	no
SPSC_01015	scaffold00007	554003	555094	1	no	0.103	363	Membrane bound Mitochondrial	5.1	no	no
SPSC_01016	scaffold00007	559614	560996	1	no	0.131	458	Cytoplasmic	3.2	no	no
SPSC_01017	scaffold00007	561677	562687	1	no	0.268	243	Membrane bound Mitochondrial	4.6	no	no
SPSC_01018	scaffold00007	564007	565830	1	no	0.102	607	Cytoplasmic	4.1	no	no
SPSC_01019	scaffold00007	566043	567149	-1	no	0.115	368	Nuclear	3.6	no	no
SPSC_01020	scaffold00008	1004	1635	1	yes	0.831	176	Membrane bound Extracellular (Secreted)	9.6	yes	no
SPSC_01021	scaffold00008	2966	6433	-1	no	0.108	1155	Cytoplasmic	6.5	no	no
SPSC_01022	scaffold00008	7796	9247	-1	no	0.165	483	Membrane bound Mitochondrial	9.3	no	no
SPSC_01023	scaffold00008	9633	10282	-1	no	0.119	162	Cytoplasmic	5.2	no	no
SPSC_01024	scaffold00008	11380	12885	1	no	0.101	501	Cytoplasmic	5.2	no	no
SPSC_01025	scaffold00008	13071	15809	-1	no	0.161	912	Nuclear	3.1	no	no
SPSC_01026	scaffold00008	16541	17314	1	no	0.101	219	Membrane bound Extracellular (Secreted)	5.1	no	no
SPSC_01027	scaffold00008	17508	18137	-1	no	0.114	209	Mitochondrial	4.5	no	no
SPSC_01028	scaffold00008	19070	19702	-1	no	0.119	181	Cytoplasmic	10	no	no
SPSC_01029	scaffold00008	20286	23495	1	no	0.113	1069	Cytoplasmic	5.9	no	no
SPSC_01030	scaffold00008	23718	24419	-1	yes	0.817	233	Membrane bound Extracellular (Secreted)	7.5	yes	yes
SPSC_01031	scaffold00008	25339	26031	-1	yes	0.838	218	Extracellular (Secreted)	9.7	yes	yes
SPSC_01032	scaffold00008	26802	27125	-1	no	0.1	107	Cytoplasmic	4.4	no	no
SPSC_01033	scaffold00008	27487	28668	-1	no	0.101	393	Cytoplasmic	4.5	no	no
SPSC_01034	scaffold00008	30491	32198	1	no	0.131	541	Plasma membrane	9.6	no	no
SPSC_01035	scaffold00008	32939	33565	-1	no	0.301	208	Cytoplasmic	4.7	no	no
SPSC_01036	scaffold00008	34313	34705	-1	no	0.361	130	Cytoplasmic	4.9	no	no
SPSC_01037	scaffold00008	35735	38965	-1	no	0.104	1076	Plasma membrane	4.6	no	no
SPSC_01038	scaffold00008	40475	42066	-1	no	0.137	492	Cytoplasmic	8.7	no	no
SPSC_01039	scaffold00008	43176	44492	1	no	0.125	383	Cytoplasmic	5.1	no	no
SPSC_01040	scaffold00008	44673	45405	-1	no	0.103	151	Mitochondrial	9.9	no	no
SPSC_01041	scaffold00008	45901	48849	1	no	0.168	982	Membrane bound Mitochondrial	5.1	no	no
SPSC_01042	scaffold00008	49336	49816	-1	no	0.169	85	Membrane bound Mitochondrial	2.2	no	no
SPSC_01043	scaffold00008	50704	51891	1	no	0.192	395	Membrane bound Mitochondrial	9.2	no	no
SPSC_01044	scaffold00008	53085	53673	1	no	0.126	122	Membrane bound Mitochondrial	8.2	no	no
SPSC_01045	scaffold00008	54377	54988	-1	no	0.131	203	Membrane bound Mitochondrial	8.2	no	no
SPSC_01046	scaffold00008	63807	66296	1	no	0.105	829	Nuclear	5.3	no	no
SPSC_01047	scaffold00008	67306	72063	1	no	0.109	1585	Plasma membrane	5.3	no	no
SPSC_01048	scaffold00008	72302	75274	-1	no	0.115	990	Cytoplasmic	6	no	no
SPSC_01049	scaffold00008	77354	78301	-1	no	0.115	315	Membrane bound Mitochondrial	3	no	no
SPSC_01050	scaffold00008	79019	79492	-1	no	0.254	157	Plasma membrane	3.7	no	no
SPSC_01051	scaffold00008	80098	81540	1	no	0.106	480	Membrane bound Mitochondrial	9.9	no	no
SPSC_01052	scaffold00008	81624	82502	-1	no	0.189	292	Nuclear	2.8	no	no
SPSC_01053	scaffold00008	83897	84841	1	no	0.113	314	Extracellular (Secreted)	3.6	yes	no
SPSC_01054	scaffold00008	85349	86157	1	no	0.106	240	Mitochondrial	5.7	no	no
SPSC_01055	scaffold00008	86707	88732	-1	no	0.107	509	Cytoplasmic	4.6	no	no
SPSC_01056	scaffold00008	90662	92014	-1	no	0.361	450	Membrane bound Mitochondrial	2.8	no	no
SPSC_01057	scaffold00008	92664	93747	-1	no	0.103	321	Cytoplasmic	10	no	no
SPSC_01058	scaffold00008	94919	96424	1	no	0.115	446	Cytoplasmic	9.8	no	no
SPSC_01059	scaffold00008	97315	97863	1	no	0.173	182	Golgi	9.8	no	no
SPSC_01060	scaffold00008	98124	100457	-1	no	0.101	777	Plasma membrane	3.9	no	no
SPSC_01061	scaffold00008	101933	103408	1	no	0.101	459	Nuclear	7.1	no	no
SPSC_01062	scaffold00008	103528	107112	-1	no	0.154	1194	Nuclear	5.9	no	no
SPSC_01063	scaffold00008	111252	113066	1	no	0.102	604	Nuclear	5.9	no	no
SPSC_01064	scaffold00008	113681	115786	-1	no	0.12	701	Nuclear	5.5	no	no
SPSC_01065	scaffold00008	123835	125202	1	no	0.111	455	Cytoplasmic	4	no	no
SPSC_01066	scaffold00008	125821	126894	1	no	0.17	357	Membrane bound Mitochondrial	9.1	no	no
SPSC_01067	scaffold00008	127063	127965	-1	no	0.291	300	Membrane bound Mitochondrial	6.1	no	no
SPSC_01068	scaffold00008	128298	128898	1	no	0.103	172	Nuclear	3.5	no	no
SPSC_01069	scaffold00008	129135	132230	-1	no	0.13	1031	Nuclear	9.9	no	no
SPSC_01070	scaffold00008	133487	133843	1	no	0.104	118	Membrane bound Golgi	9.7	no	no
SPSC_01071	scaffold00008	135294	141194	1	no	0.103	1966	Nuclear	5.4	no	no
SPSC_01072	scaffold00008	142800	146048	1	no	0.115	1082	Plasma membrane	9.6	no	no
SPSC_01073	scaffold00008	146975	149249	-1	no	0.122	757	Nuclear	6.8	no	no
SPSC_01074	scaffold00008	151651	162899	-1	no	0.161	3717	Membrane bound Mitochondrial	6.9	no	no
SPSC_01075	scaffold00008	163736	166201	1	no	0.157	821	Membrane bound Mitochondrial	8.2	no	no
SPSC_01076	scaffold00008	169680	171304	1	yes	0.529	305	Cytoplasmic	3.4	yes	yes
SPSC_01077	scaffold00008	172198	172947	-1	no	0.24	182	Plasma membrane	6.6	no	no
SPSC_01078	scaffold00008	173432	173962	-1	no	0.146	121	Nuclear	5.1	no	no
SPSC_01079	scaffold00008	175093	177708	1	no	0.2	871	Membrane bound Mitochondrial	2	no	no
SPSC_01080	scaffold00008	177978	179279	-1	no	0.102	433	Nuclear	6.1	no	no
SPSC_01081	scaffold00008	181007	184405	1	no	0.192	1132	Cytoplasmic	4.2	no	no
SPSC_01082	scaffold00008	186384	189266	1	no	0.111	960	Nuclear	4.9	no	no
SPSC_01083	scaffold00008	190236	191989	1	no	0.128	483	Nuclear	5.7	no	no
SPSC_01084	scaffold00008	192461	193030	-1	no	0.128	189	Membrane bound Mitochondrial	9.1	no	no
SPSC_01085	scaffold00008	193727	195166	-1	no	0.128	479	Membrane bound Endoplasmic reticulum	9.8	no	no
SPSC_01086	scaffold00008	201822	202523	1	no	0.266	181	Golgi	8.8	no	no
SPSC_01087	scaffold00008	203045	204036	1	no	0.104	324	Nuclear	4.3	no	no
SPSC_01088	scaffold00008	204095	205204	-1	no	0.106	332	Nuclear	4.9	no	no
SPSC_01089	scaffold00008	205532	207625	-1	no	0.115	697	Nuclear	5.7	no	no
SPSC_01090	scaffold00008	208335	211103	1	no	0.16	922	Cytoplasmic	3.3	no	no
SPSC_01091	scaffold00008	212556	214232	1	no	0.109	558	Cytoplasmic	9.9	no	no
SPSC_01092	scaffold00008	214694	216979	-1	yes	0.758	761	Membrane bound Extracellular (Secreted)	3.5	yes	yes
SPSC_01093	scaffold00008	218270	220111	-1	no	0.266	613	Membrane bound Endoplasmic reticulum	9.4	no	no
SPSC_01094	scaffold00008	220426	221565	1	no	0.293	379	Membrane bound Mitochondrial	9.6	no	no
SPSC_01095	scaffold00008	221683	224067	-1	no	0.106	794	Membrane bound Mitochondrial	5.4	no	no
SPSC_01096	scaffold00008	224995	226089	1	no	0.101	364	Cytoplasmic	7.9	no	no
SPSC_01097	scaffold00008	226416	228899	-1	no	0.105	827	Cytoplasmic	4.5	no	no
SPSC_01098	scaffold00008	231614	234355	1	no	0.105	913	Plasma membrane	3.4	no	no
SPSC_01099	scaffold00008	234442	236430	-1	no	0.108	662	Nuclear	4.9	no	no
SPSC_01100	scaffold00008	237729	244100	-1	no	0.108	2123	Plasma membrane	2.7	no	no
SPSC_01101	scaffold00008	245814	246683	1	yes	0.886	289	Extracellular (Secreted)	9	yes	yes
SPSC_01102	scaffold00008	246827	248548	-1	no	0.124	573	Nuclear	6.2	no	no
SPSC_01103	scaffold00008	249618	252425	1	no	0.1	935	Nuclear	4	no	no
SPSC_01104	scaffold00008	252729	253130	-1	no	0.11	133	Nuclear	8.8	no	no
SPSC_01105	scaffold00008	254138	255418	1	no	0.196	426	Membrane bound Mitochondrial	9.9	no	no
SPSC_01106	scaffold00008	255602	256471	-1	no	0.113	289	Cytoplasmic	4.9	no	no
SPSC_01107	scaffold00008	256852	257743	1	no	0.123	270	Membrane bound Mitochondrial	4.7	no	no
SPSC_01108	scaffold00008	257819	262573	-1	no	0.146	1584	Nuclear	6.2	no	no
SPSC_01109	scaffold00008	263222	264127	-1	no	0.103	301	Nuclear	4.6	no	no
SPSC_01110	scaffold00008	264400	265671	1	no	0.107	423	Cytoplasmic	2.9	no	no
SPSC_01111	scaffold00008	265749	267093	-1	no	0.347	420	Mitochondrial	8.3	no	no
SPSC_01112	scaffold00008	267400	269109	1	no	0.102	569	Cytoplasmic	3.8	no	no
SPSC_01113	scaffold00008	269194	270054	-1	no	0.1	286	Mitochondrial	5.5	no	no
SPSC_01114	scaffold00008	270473	271447	1	no	0.107	324	Nuclear	6	no	no
SPSC_01115	scaffold00008	271695	272966	-1	yes	0.86	423	Membrane bound Extracellular (Secreted)	5.8	yes	yes
SPSC_01116	scaffold00008	274044	276122	-1	no	0.12	692	Membrane bound Mitochondrial	7.5	no	no
SPSC_01117	scaffold00008	276752	277849	1	no	0.148	365	Membrane bound Golgi	5.2	no	no
SPSC_01118	scaffold00008	277995	278756	-1	yes	0.54	253	Mitochondrial	9.5	yes	no
SPSC_01119	scaffold00008	279528	280373	1	no	0.151	281	Mitochondrial	9.2	no	no
SPSC_01120	scaffold00008	285225	288044	1	no	0.106	939	Nuclear	6.4	no	no
SPSC_01121	scaffold00008	288864	290690	1	no	0.114	608	Nuclear	3.8	no	no
SPSC_01122	scaffold00008	290772	291677	-1	no	0.202	301	Membrane bound Mitochondrial	8.7	no	no
SPSC_01123	scaffold00008	292892	299415	1	no	0.177	2123	Cytoplasmic	4.8	no	no
SPSC_01124	scaffold00008	299787	301265	1	no	0.1	492	Nuclear	2.4	no	no
SPSC_01125	scaffold00008	301503	303167	-1	no	0.1	554	Nuclear	5.8	no	no
SPSC_01126	scaffold00008	306106	306945	1	no	0.109	279	Membrane bound Extracellular (Secreted)	5.4	no	no
SPSC_01127	scaffold00008	309126	311590	1	no	0.116	788	Cytoplasmic	3.2	no	no
SPSC_01128	scaffold00008	311763	313197	-1	no	0.101	478	Plasma membrane	8.3	no	no
SPSC_01129	scaffold00008	314992	316719	1	no	0.12	575	Nuclear	5.6	no	no
SPSC_01130	scaffold00008	316922	317628	-1	no	0.281	205	Plasma membrane	7	no	no
SPSC_01131	scaffold00008	318122	318962	1	no	0.143	253	Nuclear	4.5	no	no
SPSC_01132	scaffold00008	319369	321795	1	no	0.097	808	Nuclear	9.9	no	no
SPSC_01133	scaffold00008	322024	323451	-1	no	0.103	475	Nuclear	6.4	no	no
SPSC_01134	scaffold00008	323763	325760	-1	no	0.12	665	Membrane bound Mitochondrial	6.2	no	no
SPSC_01135	scaffold00008	327615	328562	1	no	0.103	315	Membrane bound Peroxisomal	9.8	no	no
SPSC_01136	scaffold00008	329138	330991	1	no	0.102	617	Plasma membrane	8.9	no	no
SPSC_01137	scaffold00008	331196	331618	-1	no	0.114	140	Membrane bound Mitochondrial	3.5	no	no
SPSC_01138	scaffold00008	332052	333677	1	no	0.108	541	Cytoplasmic	6	no	no
SPSC_01139	scaffold00008	333792	335555	-1	no	0.121	587	Cytoplasmic	3.5	no	no
SPSC_01140	scaffold00008	336266	337289	1	no	0.131	307	Membrane bound Mitochondrial	9.1	no	no
SPSC_01141	scaffold00008	339317	343153	1	no	0.117	1278	Plasma membrane	2.3	no	no
SPSC_01142	scaffold00008	343894	344662	-1	no	0.16	165	Extracellular (Secreted)	7.8	yes	no
SPSC_01143	scaffold00008	347223	350120	1	no	0.103	965	Nuclear	4.6	no	no
SPSC_01144	scaffold00008	351984	353183	1	no	0.115	399	Cytoplasmic	6.2	no	no
SPSC_01145	scaffold00008	353927	354760	1	no	0.103	277	Nuclear	5.3	no	no
SPSC_01146	scaffold00008	355113	356189	-1	no	0.125	210	Nuclear	4.4	no	no
SPSC_01147	scaffold00008	356883	359741	1	no	0.113	952	Cytoplasmic	6.2	no	no
SPSC_01148	scaffold00008	361473	362591	1	yes	0.802	372	Membrane bound Endoplasmic reticulum	3.1	yes	yes
SPSC_01149	scaffold00008	363030	365435	-1	no	0.2	801	Cytoplasmic	4.2	no	no
SPSC_01150	scaffold00008	367582	370605	1	no	0.114	1007	Nuclear	4.5	no	no
SPSC_01151	scaffold00008	371665	372581	1	no	0.116	168	Extracellular (Secreted)	7.5	yes	no
SPSC_01152	scaffold00008	373478	375802	1	yes	0.872	745	Membrane bound Extracellular (Secreted)	3.1	yes	yes
SPSC_01153	scaffold00008	379736	382345	1	no	0.115	869	Plasma membrane	4.5	no	no
SPSC_01154	scaffold00008	382793	387724	-1	no	0.114	1643	Nuclear	7.3	no	no
SPSC_01155	scaffold00008	388712	389205	1	no	0.238	128	Membrane bound Mitochondrial	5.4	no	no
SPSC_01156	scaffold00008	389654	390523	1	no	0.149	64	Mitochondrial	9.1	no	no
SPSC_01157	scaffold00008	392079	394559	1	no	0.107	826	Nuclear	4.2	no	no
SPSC_01158	scaffold00008	394699	400194	-1	no	0.103	1831	Nuclear	9.9	no	no
SPSC_01159	scaffold00008	401278	401916	1	no	0.201	102	Cytoplasmic	7.5	no	no
SPSC_01160	scaffold00008	402595	403952	1	no	0.105	335	Membrane bound Extracellular (Secreted)	2.1	no	no
SPSC_01161	scaffold00008	404192	405553	1	no	0.127	398	Membrane bound Extracellular (Secreted)	3.2	no	no
SPSC_01162	scaffold00008	405928	407553	-1	no	0.106	410	Cytoplasmic	9.9	no	no
SPSC_01163	scaffold00008	408667	411219	1	no	0.118	850	Nuclear	6.1	no	no
SPSC_01164	scaffold00008	412010	412894	-1	no	0.103	188	Nuclear	7.5	no	no
SPSC_01165	scaffold00008	413455	417201	-1	no	0.101	1248	Plasma membrane	9.8	no	no
SPSC_01166	scaffold00008	421531	424215	1	no	0.106	894	Cytoplasmic	7	no	no
SPSC_01167	scaffold00008	424372	426495	-1	no	0.188	707	Membrane bound Mitochondrial	7.3	no	no
SPSC_01168	scaffold00008	426999	429944	1	no	0.101	981	Plasma membrane	4.4	no	no
SPSC_01169	scaffold00008	430059	431315	-1	no	0.105	418	Membrane bound Mitochondrial	4.8	no	no
SPSC_01170	scaffold00008	432466	434841	1	no	0.111	791	Membrane bound Endoplasmic reticulum	9.8	no	no
SPSC_01171	scaffold00008	435423	437258	-1	no	0.149	611	Membrane bound Mitochondrial	5.6	no	no
SPSC_01172	scaffold00008	438054	438851	-1	no	0.103	189	Nuclear	3.8	no	no
SPSC_01173	scaffold00008	439571	440206	1	no	0.165	211	Membrane bound Mitochondrial	8.2	no	no
SPSC_01174	scaffold00008	440621	442111	1	no	0.107	496	Cytoplasmic	9.1	no	no
SPSC_01175	scaffold00008	442344	445124	-1	no	0.112	926	Membrane bound Mitochondrial	3.9	no	no
SPSC_01176	scaffold00008	445430	446477	1	no	0.124	321	Nuclear	3.3	no	no
SPSC_01177	scaffold00008	446654	449073	-1	no	0.104	766	Nuclear	3.8	no	no
SPSC_01178	scaffold00008	450554	453262	-1	no	0.122	902	Cytoplasmic	4.8	no	no
SPSC_01179	scaffold00008	454178	455103	1	no	0.228	186	Membrane bound Mitochondrial	9.8	no	no
SPSC_01180	scaffold00008	455403	456834	-1	no	0.279	269	Extracellular (Secreted)	5.5	yes	no
SPSC_01181	scaffold00008	459355	466200	-1	no	0.103	2281	Plasma membrane	8.6	no	no
SPSC_01182	scaffold00008	467175	468029	1	no	0.108	257	Cytoplasmic	5.1	no	no
SPSC_01183	scaffold00008	468644	470059	-1	no	0.106	471	Plasma membrane	5.9	no	no
SPSC_01184	scaffold00008	470641	473792	-1	no	0.099	1050	Cytoplasmic	10	no	no
SPSC_01185	scaffold00008	475035	476801	1	no	0.102	588	Nuclear	7.3	no	no
SPSC_01186	scaffold00008	476917	478749	-1	no	0.156	610	Nuclear	6.8	no	no
SPSC_01187	scaffold00008	479178	481387	-1	no	0.108	579	Plasma membrane	9.7	no	no
SPSC_01188	scaffold00008	482045	482472	1	no	0.23	62	Membrane bound Mitochondrial	9.7	no	no
SPSC_01189	scaffold00008	484564	486651	1	no	0.102	695	Cytoplasmic	4.9	no	no
SPSC_01190	scaffold00008	487289	491881	-1	no	0.12	1530	Nuclear	5.7	no	no
SPSC_01191	scaffold00008	493503	496508	1	no	0.102	1001	Cytoplasmic	5	no	no
SPSC_01192	scaffold00008	497022	497972	-1	no	0.329	288	Membrane bound Mitochondrial	9	no	no
SPSC_01193	scaffold00008	498816	500723	1	no	0.167	635	Nuclear	3.7	no	no
SPSC_01194	scaffold00008	502216	508279	1	no	0.108	2018	Plasma membrane	4.6	no	no
SPSC_01195	scaffold00008	508995	511221	-1	yes	0.634	669	Extracellular (Secreted)	9.2	yes	yes
SPSC_01196	scaffold00008	513564	514187	1	yes	0.653	207	Nuclear	8.9	yes	no
SPSC_01197	scaffold00008	515132	515680	1	yes	0.648	182	Extracellular (Secreted)	8.2	yes	yes
SPSC_01198	scaffold00008	517749	520625	1	no	0.174	934	Nuclear	3.4	no	no
SPSC_01199	scaffold00008	520751	521675	-1	no	0.238	278	Membrane bound Mitochondrial	5.5	no	no
SPSC_01200	scaffold00008	521881	526488	-1	no	0.107	1535	Nuclear	5	no	no
SPSC_01201	scaffold00008	527236	528582	-1	no	0.113	448	Nuclear	5.5	no	no
SPSC_01202	scaffold00008	529337	530152	-1	no	0.108	271	Membrane bound Endoplasmic reticulum	7	no	no
SPSC_01203	scaffold00008	530558	531387	1	no	0.1	245	Cytoplasmic	5.2	no	no
SPSC_01204	scaffold00008	531662	532150	1	no	0.105	162	Membrane bound Mitochondrial	9.4	no	no
SPSC_01205	scaffold00008	534029	534976	1	yes	0.865	315	Nuclear	4.9	yes	yes
SPSC_01206	scaffold00008	535424	538740	-1	no	0.105	1062	Cytoplasmic	5.6	no	no
SPSC_01207	scaffold00008	539051	539453	-1	no	0.098	96	Cytoplasmic	7.2	no	no
SPSC_01208	scaffold00009	112	1155	-1	no	0.11	324	Membrane bound Mitochondrial	9	no	no
SPSC_01209	scaffold00009	2309	9650	-1	no	0.102	2377	Plasma membrane	2.9	no	no
SPSC_01210	scaffold00009	10281	13214	-1	no	0.106	939	Cytoplasmic	5.3	no	no
SPSC_01211	scaffold00009	13894	15248	1	no	0.106	450	Cytoplasmic	3.3	no	no
SPSC_01212	scaffold00009	15717	16802	-1	no	0.253	361	Membrane bound Mitochondrial	9.9	no	no
SPSC_01213	scaffold00009	17769	19499	1	no	0.289	576	Membrane bound Peroxisomal	9.5	no	no
SPSC_01214	scaffold00009	19786	22233	-1	no	0.169	815	Cytoplasmic	4.8	no	no
SPSC_01215	scaffold00009	23335	27603	1	no	0.133	1268	Nuclear	3.8	no	no
SPSC_01216	scaffold00009	29827	31191	1	no	0.106	454	Cytoplasmic	7.6	no	no
SPSC_01217	scaffold00009	31599	32418	-1	no	0.132	91	Membrane bound Golgi	3.6	no	no
SPSC_01218	scaffold00009	33496	37608	1	no	0.127	1370	Cytoplasmic	2.7	no	no
SPSC_01219	scaffold00009	37832	38557	-1	no	0.111	241	Membrane bound Extracellular (Secreted)	6.5	no	no
SPSC_01220	scaffold00009	39006	39740	-1	no	0.122	244	Nuclear	5.4	no	no
SPSC_01221	scaffold00009	40130	44494	-1	no	0.103	1454	Plasma membrane	9.6	no	no
SPSC_01222	scaffold00009	45979	51729	-1	no	0.155	1916	Plasma membrane	5.4	no	no
SPSC_01223	scaffold00009	53999	55219	1	no	0.13	406	Cytoplasmic	3.3	no	no
SPSC_01224	scaffold00009	57137	58765	1	no	0.122	542	Plasma membrane	8.4	no	no
SPSC_01225	scaffold00009	58979	60343	-1	no	0.104	363	Cytoplasmic	9.8	no	no
SPSC_01226	scaffold00009	65000	69601	1	no	0.214	1502	Plasma membrane	5	no	no
SPSC_01227	scaffold00009	69755	72598	-1	no	0.195	947	Nuclear	3.4	no	no
SPSC_01228	scaffold00009	73033	74316	1	no	0.106	399	Membrane bound Mitochondrial	5.7	no	no
SPSC_01229	scaffold00009	74830	75912	1	no	0.118	360	Cytoplasmic	3.2	no	no
SPSC_01230	scaffold00009	76254	79181	-1	no	0.11	975	Plasma membrane	2.5	no	no
SPSC_01231	scaffold00009	79717	86454	-1	no	0.12	2245	Cytoplasmic	3.6	no	no
SPSC_01232	scaffold00009	92411	94030	1	no	0.149	539	Nuclear	2.3	no	no
SPSC_01233	scaffold00009	95499	97403	1	no	0.114	534	Plasma membrane	9.6	no	no
SPSC_01234	scaffold00009	98102	98714	-1	yes	0.944	135	Extracellular (Secreted)	6.1	yes	yes
SPSC_01235	scaffold00009	99249	99707	-1	no	0.131	114	Membrane bound Extracellular (Secreted)	3.4	no	no
SPSC_01236	scaffold00009	101007	101423	1	no	0.148	100	Extracellular (Secreted)	6	yes	no
SPSC_01237	scaffold00009	101579	102328	-1	no	0.121	249	Mitochondrial	9.3	no	no
SPSC_01238	scaffold00009	103224	103840	1	yes	0.853	143	Extracellular (Secreted)	8.1	yes	yes
SPSC_01239	scaffold00009	104394	104996	1	yes	0.912	137	Extracellular (Secreted)	9.8	yes	yes
SPSC_01240	scaffold00009	108422	108910	-1	no	0.145	114	Extracellular (Secreted)	4.2	yes	no
SPSC_01241	scaffold00009	109808	112037	1	no	0.13	711	Membrane bound Mitochondrial	7.4	no	no
SPSC_01242	scaffold00009	112366	113259	1	no	0.103	297	Membrane bound Mitochondrial	9.8	no	no
SPSC_01243	scaffold00009	113462	114580	-1	no	0.107	372	Membrane bound Mitochondrial	8.1	no	no
SPSC_01244	scaffold00009	115615	116165	1	no	0.1	152	Membrane bound Mitochondrial	5.3	no	no
SPSC_01245	scaffold00009	116687	119930	-1	no	0.114	960	Cytoplasmic	4.3	no	no
SPSC_01246	scaffold00009	124758	125966	-1	no	0.163	402	Membrane bound Mitochondrial	9.9	no	no
SPSC_01247	scaffold00009	128640	128981	-1	no	0.1	113	Cytoplasmic	8.7	no	no
SPSC_01248	scaffold00009	130396	131265	1	no	0.255	289	Mitochondrial	9.4	no	no
SPSC_01249	scaffold00009	131458	133011	-1	no	0.099	517	Nuclear	6.3	no	no
SPSC_01250	scaffold00009	133330	135180	-1	no	0.463	616	Plasma membrane	3.3	no	no
SPSC_01251	scaffold00009	137392	137994	1	no	0.098	200	Membrane bound Extracellular (Secreted)	7.6	no	no
SPSC_01252	scaffold00009	138135	138545	-1	no	0.133	111	Cytoplasmic	6.3	no	no
SPSC_01253	scaffold00009	138949	140247	1	no	0.103	432	Nuclear	10	no	no
SPSC_01254	scaffold00009	140343	141881	-1	no	0.169	512	Cytoplasmic	9	no	no
SPSC_01255	scaffold00009	142993	145545	1	no	0.11	850	Nuclear	3.3	no	no
SPSC_01256	scaffold00009	149066	151321	1	no	0.101	751	Membrane bound Endoplasmic reticulum	6	no	no
SPSC_01257	scaffold00009	151607	152334	-1	yes	0.903	214	Membrane bound Extracellular (Secreted)	9.3	yes	no
SPSC_01258	scaffold00009	153288	153605	-1	no	0.112	105	Cytoplasmic	6.9	no	no
SPSC_01259	scaffold00009	154080	156350	1	no	0.155	628	Membrane bound Mitochondrial	8.6	no	no
SPSC_01260	scaffold00009	157955	159106	1	yes	0.453	383	Membrane bound Extracellular (Secreted)	4.7	yes	yes
SPSC_01261	scaffold00009	159491	162377	-1	no	0.174	910	Nuclear	4.3	no	no
SPSC_01262	scaffold00009	166736	169648	-1	no	0.268	970	Nuclear	5.4	no	no
SPSC_01263	scaffold00009	170760	171632	1	no	0.129	210	Mitochondrial	5	no	no
SPSC_01264	scaffold00009	172576	173563	1	no	0.102	252	Membrane bound Extracellular (Secreted)	2.8	no	no
SPSC_01265	scaffold00009	175534	178544	1	no	0.1	975	Cytoplasmic	5	no	no
SPSC_01266	scaffold00009	179855	182530	1	no	0.184	891	Cytoplasmic	4.2	no	no
SPSC_01267	scaffold00009	182848	183822	-1	no	0.102	324	Cytoplasmic	10	no	no
SPSC_01268	scaffold00009	184325	186997	-1	no	0.102	890	Nuclear	7.5	no	no
SPSC_01269	scaffold00009	189180	189629	-1	yes	0.653	149	Extracellular (Secreted)	8.6	yes	yes
SPSC_01270	scaffold00009	194719	197715	-1	no	0.14	998	Nuclear	4	no	no
SPSC_01271	scaffold00009	198377	200632	-1	no	0.099	751	Plasma membrane	9.4	no	no
SPSC_01272	scaffold00009	201206	202231	1	no	0.101	341	Nuclear	3.2	no	no
SPSC_01273	scaffold00009	202354	204859	-1	no	0.111	560	Cytoplasmic	3.7	no	no
SPSC_01274	scaffold00009	205742	209386	-1	no	0.107	1214	Cytoplasmic	4.9	no	no
SPSC_01275	scaffold00009	211761	214901	1	yes	0.793	1046	Membrane bound Extracellular (Secreted)	9.9	yes	no
SPSC_01276	scaffold00009	215269	219330	-1	no	0.123	1353	Plasma membrane	4.6	no	no
SPSC_01277	scaffold00009	223185	224588	1	no	0.497	467	Plasma membrane	3.2	no	no
SPSC_01278	scaffold00009	225151	225606	1	no	0.107	126	Nuclear	4.9	no	no
SPSC_01279	scaffold00009	225816	227375	-1	no	0.112	519	Membrane bound Mitochondrial	6	no	no
SPSC_01280	scaffold00009	227950	229312	-1	no	0.107	312	Extracellular (Secreted)	4.7	yes	no
SPSC_01281	scaffold00009	229809	231429	-1	no	0.101	483	Nuclear	3.6	no	no
SPSC_01282	scaffold00009	232052	238750	-1	no	0.104	2232	Cytoplasmic	3	no	no
SPSC_01283	scaffold00009	239604	240683	1	no	0.138	359	Cytoplasmic	5.1	no	no
SPSC_01284	scaffold00009	240729	243332	-1	yes	0.86	867	Membrane bound Endoplasmic reticulum	8.2	yes	no
SPSC_01285	scaffold00009	249914	250582	1	no	0.184	222	Nuclear	4.4	no	no
SPSC_01286	scaffold00009	250783	253917	-1	no	0.112	1044	Nuclear	3.4	no	no
SPSC_01287	scaffold00009	255407	257704	1	no	0.13	765	Nuclear	2.9	no	no
SPSC_01288	scaffold00009	257963	258370	-1	no	0.107	74	Mitochondrial	6.4	no	no
SPSC_01289	scaffold00009	258817	261006	1	no	0.281	729	Membrane bound Endoplasmic reticulum	8.9	no	no
SPSC_01290	scaffold00009	261152	265216	-1	no	0.105	1354	Plasma membrane	8.6	no	no
SPSC_01291	scaffold00009	268383	269621	-1	no	0.153	412	Membrane bound Endoplasmic reticulum	8.8	no	no
SPSC_01292	scaffold00009	270909	272263	1	no	0.106	409	Plasma membrane	1.9	no	no
SPSC_01293	scaffold00009	272656	273366	-1	yes	0.778	236	Membrane bound Extracellular (Secreted)	9.9	yes	no
SPSC_01294	scaffold00009	274755	276989	-1	no	0.113	744	Membrane bound Mitochondrial	4.7	no	no
SPSC_01295	scaffold00009	277420	281172	1	no	0.108	1250	Membrane bound Mitochondrial	2	no	no
SPSC_01296	scaffold00009	281321	284287	-1	no	0.105	988	Nuclear	5.3	no	no
SPSC_01297	scaffold00009	285988	288234	-1	no	0.108	619	Plasma membrane	9.8	no	no
SPSC_01298	scaffold00009	291809	293149	1	no	0.103	446	Nuclear	4.2	no	no
SPSC_01299	scaffold00009	293375	294349	-1	no	0.282	324	Cytoplasmic	7.2	no	no
SPSC_01300	scaffold00009	294796	296247	-1	no	0.122	483	Cytoplasmic	8.7	no	no
SPSC_01301	scaffold00009	297762	299963	1	no	0.119	733	Membrane bound Mitochondrial	9.8	no	no
SPSC_01302	scaffold00009	300396	301769	1	no	0.131	457	Membrane bound Mitochondrial	8.7	no	no
SPSC_01303	scaffold00009	301988	303874	-1	no	0.107	628	Nuclear	6	no	no
SPSC_01304	scaffold00009	308910	311192	-1	no	0.099	760	Membrane bound Endoplasmic reticulum	9	no	no
SPSC_01305	scaffold00009	311671	312991	-1	no	0.117	403	Membrane bound Peroxisomal	9.9	no	no
SPSC_01306	scaffold00009	313949	314458	-1	no	0.104	136	Nuclear	9.2	no	no
SPSC_01307	scaffold00009	316300	316695	1	no	0.099	103	Nuclear	9.9	no	no
SPSC_01308	scaffold00009	318959	321768	1	yes	0.869	909	Plasma membrane	7.6	yes	yes
SPSC_01309	scaffold00009	322869	324995	1	no	0.106	708	Nuclear	6.5	no	no
SPSC_01310	scaffold00009	328039	330207	1	no	0.128	722	Nuclear	5.6	no	no
SPSC_01311	scaffold00009	330987	332710	1	no	0.132	264	Cytoplasmic	9.2	no	no
SPSC_01312	scaffold00009	334525	336576	-1	no	0.101	558	Membrane bound Endoplasmic reticulum	5.2	no	no
SPSC_01313	scaffold00009	337832	339212	1	no	0.101	87	Cytoplasmic	7.9	no	no
SPSC_01314	scaffold00009	339612	344204	-1	no	0.108	1470	Nuclear	4.7	no	no
SPSC_01315	scaffold00009	344781	346772	-1	no	0.109	663	Membrane bound Vacuolar	7.7	no	no
SPSC_01316	scaffold00009	347296	347679	-1	no	0.112	127	Membrane bound Mitochondrial	7.9	no	no
SPSC_01317	scaffold00009	348145	348781	1	no	0.29	168	Membrane bound Mitochondrial	5.4	no	no
SPSC_01318	scaffold00009	350258	351150	1	no	0.117	108	Mitochondrial	10	no	no
SPSC_01319	scaffold00009	352552	354242	1	no	0.102	487	Cytoplasmic	3.5	no	no
SPSC_01320	scaffold00009	354581	355830	-1	no	0.115	348	Cytoplasmic	4.1	no	no
SPSC_01321	scaffold00009	362284	363594	1	no	0.119	436	Membrane bound Mitochondrial	6.3	no	no
SPSC_01322	scaffold00009	367130	368287	1	no	0.277	385	Plasma membrane	8.9	no	no
SPSC_01323	scaffold00009	368806	369783	1	no	0.138	325	Plasma membrane	2.5	no	no
SPSC_01324	scaffold00009	370238	370867	-1	yes	0.889	209	Endoplasmic reticulum	9.2	yes	no
SPSC_01325	scaffold00009	371663	374485	-1	no	0.119	940	Membrane bound Golgi	8.2	no	no
SPSC_01326	scaffold00009	375776	377629	1	no	0.143	617	Cytoplasmic	7.7	no	no
SPSC_01327	scaffold00009	378234	378635	1	no	0.1	99	Endoplasmic reticulum	4	no	no
SPSC_01328	scaffold00009	379282	382507	-1	no	0.228	1044	Nuclear	4.6	no	no
SPSC_01329	scaffold00009	383793	384272	1	no	0.23	128	Membrane bound Vacuolar	8.2	no	no
SPSC_01330	scaffold00009	384411	385592	-1	no	0.123	393	Cytoplasmic	5.4	no	no
SPSC_01331	scaffold00009	385930	388566	1	no	0.105	878	Plasma membrane	7.8	no	no
SPSC_01332	scaffold00009	388929	391691	1	no	0.107	920	Nuclear	6.5	no	no
SPSC_01333	scaffold00009	391797	394922	-1	no	0.123	1041	Membrane bound Mitochondrial	9.9	no	no
SPSC_01334	scaffold00009	395511	399446	-1	no	0.125	1311	Nuclear	3.2	no	no
SPSC_01335	scaffold00009	400893	403598	1	no	0.114	901	Nuclear	3.9	no	no
SPSC_01336	scaffold00009	404198	405679	-1	yes	0.576	493	Membrane bound Extracellular (Secreted)	3.4	yes	yes
SPSC_01337	scaffold00009	409401	409583	-1	no	0.148	60	Extracellular (Secreted)	8.9	yes	yes
SPSC_01338	scaffold00009	410367	414131	-1	no	0.102	1254	Cytoplasmic	6.9	no	no
SPSC_01339	scaffold00009	415478	417229	-1	no	0.103	583	Nuclear	5.6	no	no
SPSC_01340	scaffold00009	420543	422537	-1	no	0.102	664	Nuclear	6.5	no	no
SPSC_01341	scaffold00009	428261	431572	-1	no	0.117	1103	Nuclear	4.2	no	no
SPSC_01342	scaffold00009	432282	434705	-1	no	0.116	807	Nuclear	3.9	no	no
SPSC_01343	scaffold00009	435730	438900	-1	no	0.245	1056	Membrane bound Mitochondrial	9.7	no	no
SPSC_01344	scaffold00009	439768	441343	1	no	0.111	509	Cytoplasmic	5.3	no	no
SPSC_01345	scaffold00009	441494	442927	-1	no	0.102	420	Cytoplasmic	6.3	no	no
SPSC_01346	scaffold00009	443566	444978	-1	no	0.103	470	Cytoplasmic	3.2	no	no
SPSC_01347	scaffold00009	445548	448541	-1	no	0.117	997	Plasma membrane	5.3	no	no
SPSC_01348	scaffold00009	449841	450395	-1	no	0.194	117	Mitochondrial	5.4	no	no
SPSC_01349	scaffold00009	450810	451560	-1	no	0.144	183	Membrane bound Golgi	9.9	no	no
SPSC_01350	scaffold00009	452410	452876	1	no	0.125	86	Nuclear	7.1	no	no
SPSC_01351	scaffold00009	453060	454056	-1	no	0.198	298	Cytoplasmic	7.8	no	no
SPSC_01352	scaffold00009	454815	459182	1	no	0.106	1455	Membrane bound Endoplasmic reticulum	3.3	no	no
SPSC_01353	scaffold00009	459251	461554	-1	no	0.129	767	Nuclear	9.7	no	no
SPSC_01354	scaffold00009	463049	464794	1	no	0.109	581	Membrane bound Extracellular (Secreted)	6.3	no	no
SPSC_01355	scaffold00009	464927	466366	-1	no	0.106	479	Nuclear	5	no	no
SPSC_01356	scaffold00009	466822	467937	1	no	0.121	371	Cytoplasmic	6.8	no	no
SPSC_01357	scaffold00009	468221	468838	-1	no	0.109	181	Mitochondrial	6.3	no	no
SPSC_01358	scaffold00009	469381	471123	1	no	0.103	580	Nuclear	3.1	no	no
SPSC_01359	scaffold00009	471516	473033	1	no	0.14	505	Membrane bound Mitochondrial	9.7	no	no
SPSC_01360	scaffold00009	473205	474308	-1	no	0.107	367	Membrane bound Endoplasmic reticulum	7.6	no	no
SPSC_01361	scaffold00009	474907	475830	-1	no	0.142	307	Mitochondrial	8.2	no	no
SPSC_01362	scaffold00009	476520	478895	1	no	0.117	791	Plasma membrane	8.4	no	no
SPSC_01363	scaffold00009	479878	481461	1	no	0.254	527	Membrane bound Mitochondrial	9.8	no	no
SPSC_01364	scaffold00009	481747	482100	-1	no	0.136	117	Mitochondrial	5	no	no
SPSC_01365	scaffold00009	482407	482972	-1	no	0.105	119	Cytoplasmic	4.2	no	no
SPSC_01366	scaffold00009	484124	486895	-1	no	0.108	923	Nuclear	5.7	no	no
SPSC_01367	scaffold00009	491202	492929	-1	no	0.12	575	Membrane bound Mitochondrial	9.4	no	no
SPSC_01368	scaffold00009	493760	496731	1	no	0.132	901	Nuclear	7.8	no	no
SPSC_01369	scaffold00009	497678	498484	1	no	0.121	268	Extracellular (Secreted)	8.3	yes	yes
SPSC_01370	scaffold00009	498609	501320	-1	no	0.1	903	Nuclear	4.1	no	no
SPSC_01371	scaffold00009	502244	505573	1	no	0.105	1109	Cytoplasmic	7.6	no	no
SPSC_01372	scaffold00009	505685	507361	-1	no	0.141	558	Cytoplasmic	2.9	no	no
SPSC_01373	scaffold00009	507784	509913	1	no	0.122	709	Cytoplasmic	9.9	no	no
SPSC_01374	scaffold00009	510035	514351	-1	no	0.118	1438	Cytoplasmic	5.2	no	no
SPSC_01375	scaffold00009	515125	516621	1	no	0.102	421	Nuclear	6.7	no	no
SPSC_01376	scaffold00009	516763	518139	-1	no	0.15	458	Membrane bound Mitochondrial	5.7	no	no
SPSC_01377	scaffold00009	518858	520654	1	no	0.107	598	Membrane bound Endoplasmic reticulum	7.4	no	no
SPSC_01378	scaffold00009	521364	522012	1	yes	0.749	189	Membrane bound Extracellular (Secreted)	9	yes	no
SPSC_01379	scaffold00009	522614	524017	-1	no	0.121	467	Membrane bound Endoplasmic reticulum	8.6	no	no
SPSC_01380	scaffold00009	524714	525968	-1	no	0.14	380	Membrane bound Mitochondrial	4.5	no	no
SPSC_01381	scaffold00009	526942	530460	1	no	0.121	1172	Cytoplasmic	2.6	no	no
SPSC_01382	scaffold00009	530566	532047	-1	no	0.098	444	Plasma membrane	4.7	no	no
SPSC_01383	scaffold00009	532554	535361	-1	no	0.106	935	Nuclear	4.2	no	no
SPSC_01384	scaffold00009	535686	536984	1	no	0.135	367	Nuclear	9.7	no	no
SPSC_01385	scaffold00009	537324	537903	1	no	0.119	142	Nuclear	9.8	no	no
SPSC_01386	scaffold00009	538523	539966	1	no	0.109	466	Cytoplasmic	6.4	no	no
SPSC_01387	scaffold00009	540123	541334	-1	no	0.109	403	Nuclear	6.5	no	no
SPSC_01388	scaffold00009	541781	542862	1	no	0.104	90	Mitochondrial	9.9	no	no
SPSC_01389	scaffold00009	543162	543809	-1	no	0.17	215	Membrane bound Mitochondrial	7.6	no	no
SPSC_01390	scaffold00009	544970	546331	1	no	0.104	453	Plasma membrane	4.7	no	no
SPSC_01391	scaffold00009	547339	549153	-1	yes	0.567	577	Plasma membrane	7.4	yes	yes
SPSC_01392	scaffold00009	553560	556913	1	no	0.102	1117	Nuclear	9.9	no	no
SPSC_01393	scaffold00009	560110	562368	1	no	0.102	752	Membrane bound Mitochondrial	9.6	no	no
SPSC_01394	scaffold00009	563416	566562	1	no	0.107	1048	Nuclear	7.1	no	no
SPSC_01395	scaffold00009	566715	570029	-1	no	0.14	1104	Plasma membrane	3.9	no	no
SPSC_01396	scaffold00009	570711	571622	-1	yes	0.804	253	Membrane bound Endoplasmic reticulum	6.1	yes	yes
SPSC_01397	scaffold00009	573635	574807	1	no	0.116	390	Membrane bound Mitochondrial	8.3	no	no
SPSC_01398	scaffold00009	574908	575736	-1	no	0.185	276	Cytoplasmic	5.3	no	no
SPSC_01399	scaffold00009	576708	579485	1	no	0.103	925	Cytoplasmic	5.7	no	no
SPSC_01400	scaffold00009	581360	582970	1	no	0.11	536	Membrane bound Endoplasmic reticulum	3.3	no	no
SPSC_01401	scaffold00009	583534	585678	-1	no	0.15	714	Plasma membrane	9.9	no	no
SPSC_01402	scaffold00009	587352	589850	1	no	0.107	832	Nuclear	4.4	no	no
SPSC_01403	scaffold00009	590082	592325	-1	no	0.104	747	Nuclear	6.1	no	no
SPSC_01404	scaffold00009	592809	598208	-1	no	0.162	1799	Nuclear	9.1	no	no
SPSC_01405	scaffold00009	599171	600319	-1	no	0.115	330	Plasma membrane	8.2	no	no
SPSC_01406	scaffold00009	602665	607056	-1	no	0.107	1409	Plasma membrane	3	no	no
SPSC_01407	scaffold00009	607605	610475	1	no	0.109	956	Cytoplasmic	5.7	no	no
SPSC_01408	scaffold00009	610524	611188	-1	no	0.113	194	Cytoplasmic	9.6	no	no
SPSC_01409	scaffold00009	611862	614159	1	no	0.099	765	Nuclear	4.1	no	no
SPSC_01410	scaffold00009	614497	619731	-1	no	0.173	1744	Plasma membrane	4.6	no	no
SPSC_01411	scaffold00009	621180	622751	1	no	0.107	523	Nuclear	3.9	no	no
SPSC_01412	scaffold00009	622831	628368	-1	no	0.196	1845	Membrane bound Vacuolar	8.9	no	no
SPSC_01413	scaffold00009	629013	630890	1	no	0.163	625	Nuclear	9.6	no	no
SPSC_01414	scaffold00009	631044	633101	-1	no	0.105	685	Cytoplasmic	9.7	no	no
SPSC_01415	scaffold00009	634806	636503	1	yes	0.724	565	Membrane bound Endoplasmic reticulum	7.8	yes	yes
SPSC_01416	scaffold00009	636954	637761	1	no	0.114	120	Cytoplasmic	9.8	no	no
SPSC_01417	scaffold00009	638078	642181	-1	no	0.105	1367	Cytoplasmic	4.3	no	no
SPSC_01418	scaffold00009	644386	645969	1	no	0.103	527	Plasma membrane	10	no	no
SPSC_01419	scaffold00009	646199	648175	-1	no	0.396	658	Plasma membrane	8.2	no	no
SPSC_01420	scaffold00009	650089	651789	1	no	0.108	566	Cytoplasmic	4.3	no	no
SPSC_01421	scaffold00009	651905	654379	-1	no	0.117	824	Membrane bound Endoplasmic reticulum	3.6	no	no
SPSC_01422	scaffold00009	655096	657673	1	no	0.106	744	Membrane bound Mitochondrial	9.4	no	no
SPSC_01423	scaffold00009	657810	658634	-1	yes	0.726	274	Extracellular (Secreted)	10	yes	yes
SPSC_01424	scaffold00009	659225	660280	-1	no	0.107	351	Mitochondrial	7.1	no	no
SPSC_01425	scaffold00009	661316	661790	-1	no	0.132	119	Mitochondrial	7.9	no	no
SPSC_01426	scaffold00009	663930	665153	1	no	0.104	407	Membrane bound Mitochondrial	7.7	no	no
SPSC_01427	scaffold00009	666063	669380	1	no	0.105	1105	Nuclear	10	no	no
SPSC_01428	scaffold00009	669557	672940	-1	no	0.111	1062	Plasma membrane	5	no	no
SPSC_01429	scaffold00009	673456	676743	-1	no	0.133	1095	Plasma membrane	5.3	no	no
SPSC_01430	scaffold00009	681000	684039	1	no	0.106	990	Plasma membrane	3.8	no	no
SPSC_01431	scaffold00009	684751	685951	-1	no	0.102	283	Nuclear	8.6	no	no
SPSC_01432	scaffold00009	686537	687881	1	no	0.114	412	Membrane bound Mitochondrial	7.4	no	no
SPSC_01433	scaffold00009	692277	695218	1	no	0.107	980	Plasma membrane	9.7	no	no
SPSC_01434	scaffold00009	697671	704528	1	no	0.102	2285	Membrane bound Endoplasmic reticulum	5.7	no	no
SPSC_01435	scaffold00009	704685	706610	-1	no	0.253	641	Plasma membrane	9.4	no	no
SPSC_01436	scaffold00009	707842	708881	1	no	0.111	169	Cytoplasmic	3.5	no	no
SPSC_01437	scaffold00009	710093	712369	1	no	0.112	758	Membrane bound Endoplasmic reticulum	7.9	no	no
SPSC_01438	scaffold00009	712853	715132	-1	no	0.275	759	Membrane bound Mitochondrial	9.1	no	no
SPSC_01439	scaffold00009	715506	720007	-1	no	0.113	1466	Plasma membrane	3.8	no	no
SPSC_01440	scaffold00009	722635	724532	-1	no	0.109	599	Membrane bound Peroxisomal	5.7	no	no
SPSC_01441	scaffold00009	730512	731819	1	no	0.177	435	Nuclear	6.2	no	no
SPSC_01442	scaffold00009	732850	735024	1	no	0.167	724	Membrane bound Mitochondrial	6.1	no	no
SPSC_01443	scaffold00009	735228	736325	-1	no	0.117	365	Membrane bound Mitochondrial	6.4	no	no
SPSC_01444	scaffold00009	736766	737171	1	yes	0.728	72	Plasma membrane	4.6	yes	yes
SPSC_01445	scaffold00009	737398	739407	-1	no	0.153	669	Cytoplasmic	2.8	no	no
SPSC_01446	scaffold00009	740020	743553	1	no	0.11	1177	Cytoplasmic	9.2	no	no
SPSC_01447	scaffold00009	743683	744335	-1	no	0.107	157	Cytoplasmic	3.5	no	no
SPSC_01448	scaffold00009	745815	747743	1	yes	0.77	612	Membrane bound Mitochondrial	5.7	yes	yes
SPSC_01449	scaffold00009	748089	750380	-1	no	0.101	763	Plasma membrane	9.5	no	no
SPSC_01450	scaffold00009	753251	754826	1	no	0.299	489	Membrane bound Endoplasmic reticulum	3.2	no	no
SPSC_01451	scaffold00009	755247	757142	-1	no	0.146	631	Membrane bound Mitochondrial	9.9	no	no
SPSC_01452	scaffold00009	761074	764154	1	no	0.107	996	Nuclear	3.1	no	no
SPSC_01453	scaffold00009	764881	768342	1	no	0.101	1153	Endoplasmic reticulum	3.5	no	no
SPSC_01454	scaffold00009	769267	771305	-1	no	0.265	492	Cytoplasmic	8.9	no	no
SPSC_01455	scaffold00009	773032	777246	-1	no	0.111	1404	Plasma membrane	5.9	no	no
SPSC_01456	scaffold00009	778516	779607	1	no	0.1	363	Cytoplasmic	7.8	no	no
SPSC_01457	scaffold00009	779736	784418	-1	no	0.107	1560	Cytoplasmic	6.5	no	no
SPSC_01458	scaffold00009	786339	788358	1	no	0.15	328	Nuclear	4.8	no	no
SPSC_01459	scaffold00009	788835	790121	-1	no	0.108	428	Nuclear	5.4	no	no
SPSC_01460	scaffold00009	790802	792541	1	no	0.109	579	Cytoplasmic	9.7	no	no
SPSC_01461	scaffold00009	794188	796319	1	no	0.104	457	Nuclear	3.2	no	no
SPSC_01462	scaffold00009	797925	802715	1	no	0.111	1596	Plasma membrane	9.7	no	no
SPSC_01463	scaffold00009	803901	808778	1	no	0.129	1625	Plasma membrane	9.4	no	no
SPSC_01464	scaffold00009	809332	810687	1	no	0.161	451	Cytoplasmic	7.8	no	no
SPSC_01465	scaffold00009	811378	813326	1	no	0.104	553	Cytoplasmic	3.6	no	no
SPSC_01466	scaffold00009	813789	814900	1	no	0.126	342	Nuclear	4.6	no	no
SPSC_01467	scaffold00009	815290	816066	-1	no	0.162	194	Membrane bound Mitochondrial	9.9	no	no
SPSC_01468	scaffold00009	816538	817854	-1	no	0.102	438	Mitochondrial	8.6	no	no
SPSC_01469	scaffold00009	818658	820476	1	no	0.272	579	Nuclear	10	no	no
SPSC_01470	scaffold00009	820697	821410	-1	yes	0.911	206	Plasma membrane	10	yes	no
SPSC_01471	scaffold00009	822010	822630	-1	no	0.149	206	Cytoplasmic	7.5	no	no
SPSC_01472	scaffold00009	823862	824594	1	no	0.102	199	Cytoplasmic	8.3	no	no
SPSC_01473	scaffold00009	827815	829818	-1	no	0.1	667	Nuclear	4.2	no	no
SPSC_01474	scaffold00009	830419	832665	1	no	0.122	748	Nuclear	4.9	no	no
SPSC_01475	scaffold00009	832939	834903	-1	no	0.134	654	Nuclear	6.1	no	no
SPSC_01476	scaffold00009	837585	847622	-1	yes	0.476	3345	Cytoplasmic	5	yes	yes
SPSC_01477	scaffold00009	848985	850178	-1	no	0.115	397	Cytoplasmic	3.4	no	no
SPSC_01478	scaffold00009	850740	855698	1	no	0.1	1652	Membrane bound Vacuolar	9	no	no
SPSC_01479	scaffold00009	855838	856714	-1	no	0.1	86	Cytoplasmic	9.6	no	no
SPSC_01480	scaffold00009	857869	858999	-1	no	0.326	376	Nuclear	3.9	no	no
SPSC_01481	scaffold00009	860485	864069	1	no	0.114	1194	Nuclear	4.3	no	no
SPSC_01482	scaffold00009	864244	866232	-1	no	0.118	662	Nuclear	4.6	no	no
SPSC_01483	scaffold00009	866556	867809	-1	no	0.137	417	Nuclear	6.4	no	no
SPSC_01484	scaffold00009	872240	874597	1	no	0.114	785	Nuclear	6.9	no	no
SPSC_01485	scaffold00009	875548	880257	1	no	0.107	1569	Plasma membrane	2.4	no	no
SPSC_01486	scaffold00009	880738	881940	-1	no	0.121	400	Membrane bound Endoplasmic reticulum	8.9	no	no
SPSC_01487	scaffold00009	882983	887164	1	no	0.158	1393	Nuclear	5	no	no
SPSC_01488	scaffold00009	887465	889018	1	no	0.114	517	Membrane bound Mitochondrial	4.5	no	no
SPSC_01489	scaffold00009	892764	895115	-1	no	0.127	783	Membrane bound Mitochondrial	7.7	no	no
SPSC_01490	scaffold00009	895667	896063	1	no	0.115	98	Membrane bound Mitochondrial	6.2	no	no
SPSC_01491	scaffold00009	896268	898922	-1	no	0.104	884	Nuclear	5.7	no	no
SPSC_01492	scaffold00009	899431	900960	-1	no	0.103	509	Nuclear	6.7	no	no
SPSC_01493	scaffold00009	902321	902755	1	no	0.1	144	Membrane bound Mitochondrial	3	no	no
SPSC_01494	scaffold00009	902970	903867	-1	yes	0.785	200	Extracellular (Secreted)	3.2	yes	yes
SPSC_01495	scaffold00009	904833	905660	-1	yes	0.904	206	Mitochondrial	3.4	yes	yes
SPSC_01496	scaffold00009	906839	907675	-1	yes	0.927	168	Extracellular (Secreted)	8.9	yes	yes
SPSC_01497	scaffold00009	909328	910171	-1	no	0.108	172	Cytoplasmic	3.2	no	no
SPSC_01498	scaffold00009	910592	911496	-1	yes	0.825	211	Extracellular (Secreted)	8	yes	yes
SPSC_01499	scaffold00009	912582	913525	-1	yes	0.84	219	Mitochondrial	6.3	yes	yes
SPSC_01500	scaffold00009	915077	919226	-1	no	0.295	1174	Nuclear	3.2	no	no
SPSC_01501	scaffold00009	920355	921259	-1	yes	0.841	220	Mitochondrial	3.1	yes	yes
SPSC_01502	scaffold00009	922932	923803	-1	yes	0.68	207	Mitochondrial	5.1	yes	yes
SPSC_01503	scaffold00009	924564	925241	-1	no	0.124	141	Mitochondrial	9.5	no	no
SPSC_01504	scaffold00009	927035	928497	1	yes	0.899	434	Nuclear	3.4	yes	yes
SPSC_01505	scaffold00009	928542	929387	-1	no	0.113	281	Cytoplasmic	3.4	no	no
SPSC_01506	scaffold00009	929858	931429	1	no	0.105	523	Plasma membrane	5.5	no	no
SPSC_01507	scaffold00009	931500	932876	-1	no	0.111	458	Cytoplasmic	6.6	no	no
SPSC_01508	scaffold00009	933276	935069	-1	yes	0.669	597	Membrane bound Extracellular (Secreted)	7.1	yes	yes
SPSC_01509	scaffold00009	936924	939125	1	no	0.109	733	Plasma membrane	4	no	no
SPSC_01510	scaffold00009	939416	943975	-1	no	0.107	1519	Cytoplasmic	4.8	no	no
SPSC_01511	scaffold00009	945737	947731	-1	no	0.103	664	Nuclear	3.7	no	no
SPSC_01512	scaffold00009	948167	949000	1	no	0.269	277	Nuclear	3.2	no	no
SPSC_01513	scaffold00009	949503	956498	-1	no	0.145	2331	Membrane bound Mitochondrial	4.2	no	no
SPSC_01514	scaffold00009	957975	959058	1	yes	0.636	310	Membrane bound Extracellular (Secreted)	9.9	yes	no
SPSC_01515	scaffold00009	959883	960387	1	no	0.113	142	Cytoplasmic	2.5	no	no
SPSC_01516	scaffold00009	960484	961755	-1	no	0.177	423	Membrane bound Mitochondrial	5.3	no	no
SPSC_01517	scaffold00009	962190	965120	1	no	0.313	976	Membrane bound Mitochondrial	9.4	no	no
SPSC_01518	scaffold00009	965235	968783	-1	no	0.104	1182	Plasma membrane	3.5	no	no
SPSC_01519	scaffold00009	969939	971280	1	no	0.099	92	Cytoplasmic	9.4	no	no
SPSC_01520	scaffold00009	972135	973929	1	yes	0.915	597	Plasma membrane	6.9	yes	yes
SPSC_01521	scaffold00009	974179	975249	-1	no	0.099	356	Cytoplasmic	5.4	no	no
SPSC_01522	scaffold00009	977402	978404	1	no	0.391	256	Membrane bound Extracellular (Secreted)	6.7	no	no
SPSC_01523	scaffold00009	979203	980037	1	no	0.157	249	Mitochondrial	7.3	no	no
SPSC_01524	scaffold00009	980725	982188	-1	no	0.122	134	Cytoplasmic	8.2	no	no
SPSC_01525	scaffold00009	982763	984035	1	no	0.108	318	Nuclear	4.2	no	no
SPSC_01526	scaffold00009	984675	988430	-1	no	0.11	1251	Nuclear	4.7	no	no
SPSC_01527	scaffold00009	992013	994625	1	no	0.111	870	Cytoplasmic	6	no	no
SPSC_01528	scaffold00009	994763	995971	-1	no	0.108	343	Cytoplasmic	5.5	no	no
SPSC_01529	scaffold00009	996842	999514	-1	yes	0.76	890	Plasma membrane	8	yes	no
SPSC_01530	scaffold00009	1000726	1002216	-1	no	0.165	496	Membrane bound Extracellular (Secreted)	9.9	no	no
SPSC_01531	scaffold00009	1003144	1004697	-1	no	0.296	517	Membrane bound Mitochondrial	4.3	no	no
SPSC_01532	scaffold00009	1005856	1007349	-1	no	0.108	497	Cytoplasmic	8.4	no	no
SPSC_01533	scaffold00014	402	1895	1	no	0.205	497	Membrane bound Endoplasmic reticulum	9.2	no	no
SPSC_01534	scaffold00014	2137	5820	-1	no	0.098	1227	Plasma membrane	2.8	no	no
SPSC_01535	scaffold00014	7949	10771	1	no	0.136	940	Nuclear	4.9	no	no
SPSC_01536	scaffold00014	10968	13097	-1	no	0.107	709	Plasma membrane	7.3	no	no
SPSC_01537	scaffold00014	14724	16338	1	yes	0.541	478	Membrane bound Extracellular (Secreted)	10	yes	no
SPSC_01538	scaffold00014	17483	18734	1	no	0.11	331	Plasma membrane	2.6	no	no
SPSC_01539	scaffold00014	19381	24294	1	no	0.114	1610	Membrane bound Vacuolar	7.8	no	no
SPSC_01540	scaffold00014	24825	27368	1	no	0.137	847	Membrane bound Mitochondrial	10	no	no
SPSC_01541	scaffold00014	27933	29741	-1	no	0.106	602	Membrane bound Endoplasmic reticulum	5.6	no	no
SPSC_01542	scaffold00014	33006	34733	1	no	0.103	575	Plasma membrane	4.4	no	no
SPSC_01543	scaffold00014	35045	35767	-1	yes	0.787	207	Plasma membrane	7.8	yes	yes
SPSC_01544	scaffold00014	37234	39069	1	no	0.115	576	Plasma membrane	8.6	no	no
SPSC_01545	scaffold00014	39287	41309	-1	no	0.124	542	Cytoplasmic	4	no	no
SPSC_01546	scaffold00014	42708	44610	1	no	0.106	607	Membrane bound Endoplasmic reticulum	4.2	no	no
SPSC_01547	scaffold00014	44702	46225	-1	no	0.103	446	Nuclear	6	no	no
SPSC_01548	scaffold00014	47182	49491	1	no	0.112	769	Cytoplasmic	9.5	no	no
SPSC_01549	scaffold00014	49787	50341	-1	yes	0.819	184	Mitochondrial	6.9	yes	yes
SPSC_01550	scaffold00014	51546	52967	-1	no	0.139	364	Plasma membrane	3.2	no	no
SPSC_01551	scaffold00014	59619	61462	1	no	0.102	531	Nuclear	6.1	no	no
SPSC_01552	scaffold00014	62427	63540	-1	no	0.112	315	Mitochondrial	4.8	no	no
SPSC_01553	scaffold00014	63883	66183	1	no	0.241	766	Membrane bound Mitochondrial	7	no	no
SPSC_01554	scaffold00014	66739	67458	1	yes	0.835	239	Extracellular (Secreted)	8.5	yes	yes
SPSC_01555	scaffold00014	69131	69580	1	no	0.187	149	Plasma membrane	5.7	no	no
SPSC_01556	scaffold00014	70062	71318	-1	no	0.104	418	Membrane bound Golgi	5.9	no	no
SPSC_01557	scaffold00014	71848	74352	-1	no	0.109	834	Cytoplasmic	4.7	no	no
SPSC_01558	scaffold00014	75357	78824	-1	no	0.103	1098	Cytoplasmic	4.2	no	no
SPSC_01559	scaffold00014	80546	82046	-1	no	0.101	448	Cytoplasmic	6.8	no	no
SPSC_01560	scaffold00014	84111	84959	-1	no	0.097	145	Cytoplasmic	8.2	no	no
SPSC_01561	scaffold00014	85523	86584	1	no	0.101	353	Nuclear	6.2	no	no
SPSC_01562	scaffold00014	86743	88500	-1	no	0.128	585	Membrane bound Mitochondrial	9.3	no	no
SPSC_01563	scaffold00014	89569	90065	1	no	0.2	107	Membrane bound Mitochondrial	10	no	no
SPSC_01564	scaffold00014	90312	92300	-1	no	0.108	662	Nuclear	6.1	no	no
SPSC_01565	scaffold00014	92641	94592	1	no	0.103	622	Cytoplasmic	3.2	no	no
SPSC_01566	scaffold00014	95268	98957	1	no	0.124	1229	Membrane bound Endoplasmic reticulum	8.1	no	no
SPSC_01567	scaffold00014	99626	100525	1	no	0.149	299	Mitochondrial	9.1	no	no
SPSC_01568	scaffold00014	100771	103518	-1	no	0.156	915	Membrane bound Mitochondrial	7.4	no	no
SPSC_01569	scaffold00014	104034	109268	-1	no	0.107	1744	Plasma membrane	5	no	no
SPSC_01570	scaffold00014	110654	111466	-1	yes	0.867	270	Membrane bound Extracellular (Secreted)	9.3	yes	no
SPSC_01571	scaffold00014	113230	115779	1	no	0.11	849	Nuclear	9.9	no	no
SPSC_01572	scaffold00014	115862	120091	-1	no	0.172	1409	Plasma membrane	4.5	no	no
SPSC_01573	scaffold00014	120831	123362	1	no	0.119	843	Membrane bound Endoplasmic reticulum	3.2	no	no
SPSC_01574	scaffold00014	124787	126289	1	no	0.116	500	Membrane bound Mitochondrial	9.9	no	no
SPSC_01575	scaffold00014	127044	130493	1	no	0.151	1149	Plasma membrane	3.7	no	no
SPSC_01576	scaffold00014	131158	132300	1	no	0.183	350	Cytoplasmic	9.9	no	no
SPSC_01577	scaffold00014	133342	137601	1	no	0.112	1419	Nuclear	2.9	no	no
SPSC_01578	scaffold00014	137949	141224	1	no	0.134	1091	Membrane bound Mitochondrial	8.2	no	no
SPSC_01579	scaffold00014	141359	142774	-1	no	0.124	471	Cytoplasmic	9.4	no	no
SPSC_01580	scaffold00014	143469	144158	1	no	0.102	229	Cytoplasmic	2.8	no	no
SPSC_01581	scaffold00014	144635	147742	1	no	0.155	1035	Nuclear	6.8	no	no
SPSC_01582	scaffold00014	148164	149512	1	no	0.119	439	Membrane bound Mitochondrial	3.2	no	no
SPSC_01583	scaffold00014	156315	158951	1	no	0.136	837	Nuclear	5.3	no	no
SPSC_01584	scaffold00014	159579	164510	1	no	0.21	1643	Cytoplasmic	3.4	no	no
SPSC_01585	scaffold00014	166368	167705	1	no	0.151	445	Mitochondrial	6.6	no	no
SPSC_01586	scaffold00014	168102	169856	1	no	0.1	584	Nuclear	3.9	no	no
SPSC_01587	scaffold00014	170282	174835	1	no	0.102	1517	Cytoplasmic	3.3	no	no
SPSC_01588	scaffold00014	175035	175748	-1	no	0.104	237	Mitochondrial	7.3	no	no
SPSC_01589	scaffold00014	176190	176990	1	no	0.123	266	Membrane bound Mitochondrial	2.5	no	no
SPSC_01590	scaffold00014	179384	181510	1	yes	0.837	708	Membrane bound Extracellular (Secreted)	4.4	yes	yes
SPSC_01591	scaffold00014	181913	185170	-1	no	0.105	1085	Nuclear	6.1	no	no
SPSC_01592	scaffold00014	185964	186385	1	no	0.104	93	Mitochondrial	9.9	no	no
SPSC_01593	scaffold00014	187190	187582	-1	no	0.265	65	Membrane bound Extracellular (Secreted)	5.7	no	no
SPSC_01594	scaffold00014	189466	191451	-1	no	0.111	661	Membrane bound Mitochondrial	9.9	no	no
SPSC_01595	scaffold00014	192121	193434	1	no	0.127	437	Cytoplasmic	3.5	no	no
SPSC_01596	scaffold00014	193452	194162	-1	no	0.107	179	Mitochondrial	3.1	no	no
SPSC_01597	scaffold00014	195589	196542	1	no	0.121	317	Nuclear	6.2	no	no
SPSC_01598	scaffold00014	196610	199102	-1	no	0.297	830	Membrane bound Mitochondrial	6.9	no	no
SPSC_01599	scaffold00014	199834	203514	1	no	0.196	1226	Cytoplasmic	4.2	no	no
SPSC_01600	scaffold00014	204091	205377	1	no	0.105	428	Nuclear	5.9	no	no
SPSC_01601	scaffold00014	205457	208445	-1	no	0.449	980	Membrane bound Mitochondrial	7.4	no	no
SPSC_01602	scaffold00014	208791	209903	1	no	0.143	344	Membrane bound Mitochondrial	9.4	no	no
SPSC_01603	scaffold00014	210745	211792	1	no	0.107	311	Membrane bound Mitochondrial	9.9	no	no
SPSC_01604	scaffold00014	212089	212769	-1	no	0.124	226	Endoplasmic reticulum	4.8	no	no
SPSC_01605	scaffold00014	213583	214764	1	no	0.112	393	Cytoplasmic	4.2	no	no
SPSC_01606	scaffold00014	215276	216175	1	no	0.214	261	Membrane bound Mitochondrial	9.9	no	no
SPSC_01607	scaffold00014	217728	223133	1	no	0.114	1801	Endoplasmic reticulum	3.6	no	no
SPSC_01608	scaffold00014	229284	230777	1	no	0.106	497	Nuclear	6.1	no	no
SPSC_01609	scaffold00014	231937	236160	-1	no	0.113	1407	Cytoplasmic	3.2	no	no
SPSC_01610	scaffold00014	237725	238666	-1	no	0.148	313	Membrane bound Endoplasmic reticulum	9.1	no	no
SPSC_01611	scaffold00014	239645	243268	-1	no	0.117	1207	Nuclear	6.2	no	no
SPSC_01612	scaffold00014	243779	245314	-1	no	0.108	511	Nuclear	9.9	no	no
SPSC_01613	scaffold00014	245955	246914	1	no	0.097	319	Nuclear	5.6	no	no
SPSC_01614	scaffold00014	247427	248978	-1	no	0.107	484	Plasma membrane	9.9	no	no
SPSC_01615	scaffold00014	251673	252401	-1	no	0.149	242	Mitochondrial	9.1	no	no
SPSC_01616	scaffold00014	252756	253721	1	no	0.137	321	Nuclear	5.7	no	no
SPSC_01617	scaffold00014	253857	255137	-1	no	0.111	426	Membrane bound Mitochondrial	9.2	no	no
SPSC_01618	scaffold00014	255579	256596	1	no	0.132	308	Membrane bound Mitochondrial	8.8	no	no
SPSC_01619	scaffold00014	256858	258702	-1	no	0.112	614	Nuclear	4.5	no	no
SPSC_01620	scaffold00014	259108	260832	1	no	0.202	574	Nuclear	5.1	no	no
SPSC_01621	scaffold00014	260861	262738	-1	no	0.105	597	Cytoplasmic	5.1	no	no
SPSC_01622	scaffold00014	264169	265146	-1	no	0.113	299	Extracellular (Secreted)	5.3	yes	no
SPSC_01623	scaffold00014	266656	268479	-1	no	0.296	586	Nuclear	4.2	no	no
SPSC_01624	scaffold00014	268813	270687	1	no	0.137	624	Plasma membrane	6.6	no	no
SPSC_01625	scaffold00014	270728	272026	-1	no	0.151	432	Plasma membrane	2.9	no	no
SPSC_01626	scaffold00014	272330	273709	1	no	0.099	459	Nuclear	6.1	no	no
SPSC_01627	scaffold00014	273989	275029	-1	no	0.107	346	Cytoplasmic	10	no	no
SPSC_01628	scaffold00014	275722	276519	1	no	0.105	265	Membrane bound Mitochondrial	5.4	no	no
SPSC_01629	scaffold00014	276850	277850	-1	no	0.144	246	Membrane bound Mitochondrial	9.9	no	no
SPSC_01630	scaffold00014	286219	288780	1	no	0.119	853	Cytoplasmic	6.4	no	no
SPSC_01631	scaffold00014	289559	290845	-1	no	0.139	428	Cytoplasmic	3.7	no	no
SPSC_01632	scaffold00014	291305	292708	1	no	0.408	467	Membrane bound Mitochondrial	9.1	no	no
SPSC_01633	scaffold00014	293566	296070	1	no	0.13	834	Mitochondrial	5.9	no	no
SPSC_01634	scaffold00014	296530	297969	-1	no	0.104	415	Cytoplasmic	4.3	no	no
SPSC_01635	scaffold00014	300080	300686	-1	no	0.182	136	Nuclear	8.1	no	no
SPSC_01636	scaffold00014	301166	302392	1	no	0.111	408	Nuclear	6	no	no
SPSC_01637	scaffold00014	302516	306196	-1	no	0.1	1226	Cytoplasmic	4.6	no	no
SPSC_01638	scaffold00014	306805	307929	1	no	0.115	374	Nuclear	8.3	no	no
SPSC_01639	scaffold00014	308073	310193	-1	no	0.414	706	Membrane bound Extracellular (Secreted)	7.3	no	no
SPSC_01640	scaffold00014	310851	313676	-1	no	0.187	941	Membrane bound Mitochondrial	9.2	no	no
SPSC_01641	scaffold00014	316793	318386	1	no	0.142	483	Cytoplasmic	4.4	no	no
SPSC_01642	scaffold00014	319100	320602	-1	no	0.174	500	Plasma membrane	3	no	no
SPSC_01643	scaffold00014	321278	322360	1	no	0.124	360	Membrane bound Golgi	7.7	no	no
SPSC_01644	scaffold00014	322891	327306	1	no	0.101	1471	Cytoplasmic	3.6	no	no
SPSC_01645	scaffold00014	327536	329317	-1	no	0.125	592	Mitochondrial	9.9	no	no
SPSC_01646	scaffold00014	330819	333778	1	no	0.114	790	Cytoplasmic	8.9	no	no
SPSC_01647	scaffold00014	334031	335482	-1	no	0.108	483	Membrane bound Mitochondrial	9.8	no	no
SPSC_01648	scaffold00014	335807	336226	1	no	0.247	139	Membrane bound Vacuolar	5.3	no	no
SPSC_01649	scaffold00014	338018	340543	-1	no	0.101	841	Nuclear	4.7	no	no
SPSC_01650	scaffold00014	340843	344015	-1	no	0.1	1030	Membrane bound Vacuolar	3.8	no	no
SPSC_01651	scaffold00014	344920	347361	-1	no	0.118	716	Membrane bound Endoplasmic reticulum	7.7	no	no
SPSC_01652	scaffold00014	348082	348655	1	yes	0.901	70	Plasma membrane	8.7	yes	no
SPSC_01653	scaffold00014	356181	356477	-1	no	0.1	98	Lysosomal	5.5	no	no
SPSC_01654	scaffold00014	356972	358519	-1	no	0.104	515	Plasma membrane	3.7	no	no
SPSC_01655	scaffold00014	360705	361682	1	yes	0.838	325	Membrane bound Endoplasmic reticulum	6.8	yes	yes
SPSC_01656	scaffold00014	362194	367224	-1	no	0.136	1676	Plasma membrane	3.8	no	no
SPSC_01657	scaffold00014	373513	374604	-1	no	0.127	363	Membrane bound Extracellular (Secreted)	4	no	no
SPSC_01658	scaffold00014	375245	376889	1	no	0.116	514	Membrane bound Endoplasmic reticulum	6.2	no	no
SPSC_01659	scaffold00014	377152	380187	-1	no	0.108	951	Cytoplasmic	3.6	no	no
SPSC_01660	scaffold00014	381216	382429	-1	no	0.106	312	Cytoplasmic	2.5	no	no
SPSC_01661	scaffold00014	382750	383494	-1	no	0.1	208	Cytoplasmic	6.5	no	no
SPSC_01662	scaffold00014	383742	385748	1	no	0.138	668	Membrane bound Mitochondrial	4.9	no	no
SPSC_01663	scaffold00014	387971	390383	-1	no	0.148	721	Nuclear	4.5	no	no
SPSC_01664	scaffold00014	390937	393361	1	no	0.108	696	Plasma membrane	5.5	no	no
SPSC_01665	scaffold00014	393727	394650	-1	yes	0.825	307	Plasma membrane	3	yes	yes
SPSC_01666	scaffold00014	395330	398299	1	no	0.11	989	Cytoplasmic	3.6	no	no
SPSC_01667	scaffold00014	398441	403123	-1	no	0.1	1560	Membrane bound Endoplasmic reticulum	4.5	no	no
SPSC_01668	scaffold00014	405724	408411	1	no	0.106	895	Membrane bound Endoplasmic reticulum	7.8	no	no
SPSC_01669	scaffold00014	408615	409721	-1	no	0.145	368	Cytoplasmic	4	no	no
SPSC_01670	scaffold00014	412068	414356	-1	no	0.197	762	Membrane bound Mitochondrial	8.4	no	no
SPSC_01671	scaffold00014	415028	418738	-1	no	0.125	1236	Nuclear	3.4	no	no
SPSC_01672	scaffold00014	419368	425134	-1	no	0.132	1892	Cytoplasmic	4.3	no	no
SPSC_01673	scaffold00014	427556	428548	-1	yes	0.922	330	Membrane bound Extracellular (Secreted)	5.1	yes	yes
SPSC_01674	scaffold00014	429915	433490	1	no	0.104	1191	Nuclear	6	no	no
SPSC_01675	scaffold00014	433740	434630	1	no	0.169	296	Cytoplasmic	5.8	no	no
SPSC_01676	scaffold00014	434970	436394	1	no	0.121	474	Plasma membrane	6.7	no	no
SPSC_01677	scaffold00014	436792	440862	-1	no	0.145	1356	Plasma membrane	5	no	no
SPSC_01678	scaffold00014	441610	443562	-1	no	0.137	650	Membrane bound Mitochondrial	4.7	no	no
SPSC_01679	scaffold00014	445075	445788	1	no	0.116	237	Membrane bound Mitochondrial	5.8	no	no
SPSC_01680	scaffold00014	446445	449159	-1	no	0.44	904	Nuclear	4.8	no	no
SPSC_01681	scaffold00014	449506	450618	1	no	0.106	370	Nuclear	7.7	no	no
SPSC_01682	scaffold00014	453037	454659	1	no	0.116	540	Nuclear	6.9	no	no
SPSC_01683	scaffold00014	455526	456178	-1	no	0.105	152	Plasma membrane	6.1	no	no
SPSC_01684	scaffold00014	457275	459221	-1	no	0.134	648	Membrane bound Mitochondrial	3.9	no	no
SPSC_01685	scaffold00014	459648	461165	1	no	0.104	505	Nuclear	5.6	no	no
SPSC_01686	scaffold00014	461348	463483	-1	no	0.17	711	Plasma membrane	5.7	no	no
SPSC_01687	scaffold00014	466123	468099	1	no	0.106	658	Nuclear	6.3	no	no
SPSC_01688	scaffold00014	468943	469937	-1	no	0.108	276	Mitochondrial	9	no	no
SPSC_01689	scaffold00014	475187	476414	1	no	0.132	345	Membrane bound Mitochondrial	9.9	no	no
SPSC_01690	scaffold00014	476642	479965	-1	no	0.121	1107	Membrane bound Golgi	6	no	no
SPSC_01691	scaffold00014	483784	486558	1	no	0.108	924	Nuclear	5.1	no	no
SPSC_01692	scaffold00014	486925	489738	-1	no	0.16	937	Nuclear	9.1	no	no
SPSC_01693	scaffold00014	490331	491044	-1	no	0.182	206	Membrane bound Endoplasmic reticulum	9.5	no	no
SPSC_01694	scaffold00014	491509	492253	1	no	0.112	219	Membrane bound Mitochondrial	6.4	no	no
SPSC_01695	scaffold00014	492705	494042	1	no	0.101	445	Nuclear	3.6	no	no
SPSC_01696	scaffold00014	494100	496118	-1	no	0.212	672	Nuclear	6.3	no	no
SPSC_01697	scaffold00014	497926	501792	1	no	0.161	1288	Plasma membrane	7.6	no	no
SPSC_01698	scaffold00014	501933	502919	-1	no	0.108	328	Plasma membrane	4.9	no	no
SPSC_01699	scaffold00014	503479	505105	-1	yes	0.775	514	Membrane bound Mitochondrial	5.1	yes	yes
SPSC_01700	scaffold00014	506606	507209	-1	no	0.176	100	Extracellular (Secreted)	9.7	yes	yes
SPSC_01701	scaffold00014	507816	509669	1	no	0.11	617	Cytoplasmic	3.4	no	no
SPSC_01702	scaffold00014	509755	510345	-1	no	0.188	196	Membrane bound Mitochondrial	9.4	no	no
SPSC_01703	scaffold00014	510825	512867	1	no	0.101	680	Plasma membrane	9.2	no	no
SPSC_01704	scaffold00014	513031	516741	-1	no	0.105	1236	Cytoplasmic	3.2	no	no
SPSC_01705	scaffold00014	517736	519685	1	yes	0.909	649	Plasma membrane	6.3	yes	yes
SPSC_01706	scaffold00014	521854	522687	1	yes	0.855	277	Membrane bound Mitochondrial	7.7	yes	yes
SPSC_01707	scaffold00014	524253	525044	-1	yes	0.755	263	Mitochondrial	6.8	yes	yes
SPSC_01708	scaffold00014	527245	528207	1	no	0.116	320	Cytoplasmic	3.3	no	no
SPSC_01709	scaffold00014	529081	530010	1	yes	0.651	309	Extracellular (Secreted)	6.2	yes	yes
SPSC_01710	scaffold00014	533066	533971	1	yes	0.829	301	Extracellular (Secreted)	4.1	yes	yes
SPSC_01711	scaffold00014	534237	535688	-1	yes	0.737	483	Plasma membrane	3.2	yes	yes
SPSC_01712	scaffold00014	536516	538129	1	no	0.119	536	Cytoplasmic	5.4	no	no
SPSC_01713	scaffold00014	540539	542548	-1	no	0.157	669	Nuclear	6.4	no	no
SPSC_01714	scaffold00014	549311	552118	-1	no	0.105	935	Nuclear	8.4	no	no
SPSC_01715	scaffold00014	555125	556711	1	no	0.106	528	Nuclear	5	no	no
SPSC_01716	scaffold00014	558012	559715	1	no	0.1	567	Cytoplasmic	9.6	no	no
SPSC_01717	scaffold00014	559991	564394	-1	no	0.129	1467	Nuclear	3.8	no	no
SPSC_01718	scaffold00014	564974	565721	-1	no	0.102	192	Cytoplasmic	6.9	no	no
SPSC_01719	scaffold00014	566638	569412	1	no	0.126	606	Membrane bound Mitochondrial	10	no	no
SPSC_01720	scaffold00014	569701	571101	-1	no	0.126	466	Nuclear	6.3	no	no
SPSC_01721	scaffold00014	572232	576035	-1	no	0.106	1267	Cytoplasmic	6.9	no	no
SPSC_01722	scaffold00014	577009	577670	1	no	0.104	186	Nuclear	5.3	no	no
SPSC_01723	scaffold00014	578510	581830	1	no	0.154	1106	Cytoplasmic	7	no	no
SPSC_01724	scaffold00014	586544	587632	1	no	0.106	362	Nuclear	5.8	no	no
SPSC_01725	scaffold00014	587927	588934	-1	no	0.213	273	Nuclear	2.4	no	no
SPSC_01726	scaffold00014	589387	591246	1	no	0.316	619	Plasma membrane	3.4	no	no
SPSC_01727	scaffold00014	591385	592926	-1	no	0.193	513	Cytoplasmic	4.3	no	no
SPSC_01728	scaffold00014	593204	595291	1	no	0.127	695	Membrane bound Mitochondrial	7.2	no	no
SPSC_01729	scaffold00014	596127	597320	1	no	0.107	397	Extracellular (Secreted)	8.2	yes	yes
SPSC_01730	scaffold00014	597464	598924	-1	no	0.159	486	Nuclear	7	no	no
SPSC_01731	scaffold00014	600832	603759	1	no	0.105	975	Nuclear	2.5	no	no
SPSC_01732	scaffold00014	603878	605833	-1	no	0.112	651	Nuclear	5.6	no	no
SPSC_01733	scaffold00014	606577	607203	1	no	0.154	208	Cytoplasmic	3.3	no	no
SPSC_01734	scaffold00014	610074	611162	-1	no	0.119	362	Nuclear	2.2	no	no
SPSC_01735	scaffold00014	612227	612667	1	no	0.104	146	Cytoplasmic	6.1	no	no
SPSC_01736	scaffold00014	612880	614311	-1	yes	0.512	451	Plasma membrane	3.7	yes	yes
SPSC_01737	scaffold00014	615793	619317	1	no	0.102	1174	Nuclear	5	no	no
SPSC_01738	scaffold00014	619610	620119	1	yes	0.821	144	Extracellular (Secreted)	9.5	yes	yes
SPSC_01739	scaffold00014	620553	621065	1	yes	0.773	140	Extracellular (Secreted)	6.4	yes	yes
SPSC_01740	scaffold00014	621619	623682	-1	no	0.115	687	Cytoplasmic	5	no	no
SPSC_01741	scaffold00014	623998	625448	1	no	0.146	449	Membrane bound Mitochondrial	4.3	no	no
SPSC_01742	scaffold00014	625776	627260	1	no	0.105	494	Membrane bound Endoplasmic reticulum	5.7	no	no
SPSC_01743	scaffold00014	627680	630274	1	no	0.103	746	Nuclear	9.7	no	no
SPSC_01744	scaffold00014	630645	632924	-1	no	0.179	759	Nuclear	7.1	no	no
SPSC_01745	scaffold00014	633529	636084	-1	no	0.102	851	Nuclear	5.3	no	no
SPSC_01746	scaffold00014	636597	638192	-1	no	0.119	531	Cytoplasmic	9.6	no	no
SPSC_01747	scaffold00014	640499	640945	-1	no	0.12	148	Nuclear	6.9	no	no
SPSC_01748	scaffold00014	641882	643594	-1	no	0.107	570	Plasma membrane	4.3	no	no
SPSC_01749	scaffold00014	644197	645070	1	no	0.154	200	Cytoplasmic	9.8	no	no
SPSC_01750	scaffold00014	645136	646752	-1	no	0.151	538	Nuclear	4.8	no	no
SPSC_01751	scaffold00014	651208	651981	1	no	0.105	257	Membrane bound Mitochondrial	7.4	no	no
SPSC_01752	scaffold00014	652199	653632	-1	no	0.124	477	Membrane bound Mitochondrial	3.2	no	no
SPSC_01753	scaffold00014	654166	655098	1	no	0.101	310	Plasma membrane	3.7	no	no
SPSC_01754	scaffold00014	655620	656252	1	no	0.103	182	Mitochondrial	9.8	no	no
SPSC_01755	scaffold00014	657309	659054	1	no	0.097	581	Nuclear	9.3	no	no
SPSC_01756	scaffold00014	659373	662525	-1	no	0.105	1050	Nuclear	5.9	no	no
SPSC_01757	scaffold00014	665318	666961	1	no	0.126	547	Membrane bound Lysosomal	3.9	no	no
SPSC_01758	scaffold00014	667933	670569	1	no	0.106	878	Membrane bound Endoplasmic reticulum	7.3	no	no
SPSC_01759	scaffold00014	671103	673583	-1	no	0.109	826	Membrane bound Mitochondrial	7.6	no	no
SPSC_01760	scaffold00014	674460	675650	-1	no	0.123	396	Membrane bound Mitochondrial	9.9	no	no
SPSC_01761	scaffold00014	676746	677135	1	no	0.167	129	Mitochondrial	8.3	no	no
SPSC_01762	scaffold00014	677283	678620	1	yes	0.594	410	Membrane bound Mitochondrial	3.1	yes	yes
SPSC_01763	scaffold00014	678738	679853	1	no	0.155	337	Cytoplasmic	3.6	no	no
SPSC_01764	scaffold00014	680230	680994	-1	no	0.111	254	Nuclear	2.3	no	no
SPSC_01765	scaffold00014	688795	692399	1	no	0.109	1194	Cytoplasmic	4.7	no	no
SPSC_01766	scaffold00014	692870	696417	1	no	0.116	1150	Membrane bound Endoplasmic reticulum	5.9	no	no
SPSC_01767	scaffold00014	696532	699486	-1	no	0.109	984	Cytoplasmic	5.7	no	no
SPSC_01768	scaffold00014	699773	700831	1	no	0.132	352	Membrane bound Mitochondrial	9.5	no	no
SPSC_01769	scaffold00014	700887	701939	-1	no	0.108	350	Cytoplasmic	3.6	no	no
SPSC_01770	scaffold00014	702257	704056	1	no	0.112	599	Plasma membrane	4.8	no	no
SPSC_01771	scaffold00014	705261	706367	1	no	0.117	333	Membrane bound Mitochondrial	9.9	no	no
SPSC_01772	scaffold00014	706814	707113	-1	no	0.103	99	Nuclear	10	no	no
SPSC_01773	scaffold00014	709097	710528	1	no	0.116	401	Membrane bound Vacuolar	4.4	no	no
SPSC_01774	scaffold00014	711571	714324	1	no	0.112	917	Cytoplasmic	8.4	no	no
SPSC_01775	scaffold00014	714429	714883	-1	no	0.164	91	Mitochondrial	7.2	no	no
SPSC_01776	scaffold00014	715399	716165	1	no	0.183	132	Mitochondrial	7.8	no	no
SPSC_01777	scaffold00014	717106	718515	1	no	0.097	469	Cytoplasmic	6.5	no	no
SPSC_01778	scaffold00014	718860	721610	-1	no	0.119	916	Cytoplasmic	4.1	no	no
SPSC_01779	scaffold00014	723716	725075	1	no	0.211	358	Cytoplasmic	9.7	no	no
SPSC_01780	scaffold00014	725813	729169	1	yes	0.808	1118	Plasma membrane	4.1	yes	yes
SPSC_01781	scaffold00014	729455	730075	-1	no	0.108	142	Membrane bound Mitochondrial	6.6	no	no
SPSC_01782	scaffold00014	730445	731122	1	no	0.104	225	Nuclear	4.3	no	no
SPSC_01783	scaffold00014	731505	732089	-1	no	0.121	194	Mitochondrial	8.6	no	no
SPSC_01784	scaffold00014	733788	735170	1	no	0.123	160	Cytoplasmic	5.3	no	no
SPSC_01785	scaffold00014	736183	737667	1	no	0.142	494	Membrane bound Mitochondrial	9.5	no	no
SPSC_01786	scaffold00014	737956	739659	-1	no	0.124	567	Cytoplasmic	9.9	no	no
SPSC_01787	scaffold00014	740178	740898	1	no	0.106	208	Membrane bound Golgi	9.6	no	no
SPSC_01788	scaffold00014	742051	743639	1	no	0.155	500	Membrane bound Mitochondrial	7.4	no	no
SPSC_01789	scaffold00014	743873	746706	-1	no	0.115	858	Nuclear	9.9	no	no
SPSC_01790	scaffold00014	748208	751939	1	no	0.106	1243	Cytoplasmic	5.9	no	no
SPSC_01791	scaffold00014	752102	755145	-1	no	0.4	1014	Cytoplasmic	3.2	no	no
SPSC_01792	scaffold00014	755581	757773	-1	no	0.104	730	Nuclear	9.9	no	no
SPSC_01793	scaffold00014	758177	760771	-1	no	0.116	864	Cytoplasmic	4.2	no	no
SPSC_01794	scaffold00014	761973	763820	1	no	0.136	615	Cytoplasmic	7.6	no	no
SPSC_01795	scaffold00014	764186	764893	1	no	0.209	235	Nuclear	6.7	no	no
SPSC_01796	scaffold00014	767459	769687	-1	no	0.129	742	Cytoplasmic	3.9	no	no
SPSC_01797	scaffold00014	776200	779424	-1	no	0.102	1074	Plasma membrane	3.8	no	no
SPSC_01798	scaffold00014	781052	784021	1	no	0.108	989	Plasma membrane	9.8	no	no
SPSC_01799	scaffold00014	784316	784765	-1	no	0.266	92	Mitochondrial	9.9	no	no
SPSC_01800	scaffold00014	785405	786586	1	no	0.101	393	Mitochondrial	6	no	no
SPSC_01801	scaffold00014	787098	787999	-1	no	0.103	68	Mitochondrial	9.9	no	no
SPSC_01802	scaffold00014	788751	791662	-1	no	0.113	875	Nuclear	2.8	no	no
SPSC_01803	scaffold00014	792359	793636	1	no	0.324	425	Membrane bound Mitochondrial	7.1	no	no
SPSC_01804	scaffold00014	797150	798187	1	no	0.159	231	Mitochondrial	9.5	no	no
SPSC_01805	scaffold00014	798524	799731	1	no	0.217	354	Plasma membrane	9.8	no	no
SPSC_01806	scaffold00014	801889	803538	1	yes	0.73	549	Plasma membrane	7.2	yes	yes
SPSC_01807	scaffold00014	806013	806980	-1	no	0.102	241	Membrane bound Extracellular (Secreted)	2.2	no	no
SPSC_01808	scaffold00014	807391	808175	1	no	0.102	156	Cytoplasmic	9.9	no	no
SPSC_01809	scaffold00014	808396	811765	-1	no	0.11	1093	Nuclear	4.7	no	no
SPSC_01810	scaffold00014	817585	820263	-1	no	0.124	892	Cytoplasmic	9.7	no	no
SPSC_01811	scaffold00014	821020	821796	1	no	0.102	258	Membrane bound Vacuolar	8.7	no	no
SPSC_01812	scaffold00014	821982	823925	-1	no	0.465	647	Plasma membrane	6.3	no	no
SPSC_01813	scaffold00014	826675	827709	-1	no	0.113	334	Cytoplasmic	7.8	no	no
SPSC_01814	scaffold00014	828455	831592	1	no	0.107	1045	Membrane bound Mitochondrial	7	no	no
SPSC_01815	scaffold00014	832121	833740	1	no	0.111	539	Nuclear	9.8	no	no
SPSC_01816	scaffold00014	837675	838927	-1	no	0.101	375	Cytoplasmic	9.6	no	no
SPSC_01817	scaffold00014	843951	846092	1	no	0.106	713	Nuclear	6.4	no	no
SPSC_01818	scaffold00014	846463	847881	-1	no	0.173	472	Nuclear	5.2	no	no
SPSC_01819	scaffold00014	850219	850647	-1	no	0.101	142	Membrane bound Mitochondrial	5.9	no	no
SPSC_01820	scaffold00014	851236	852104	-1	no	0.105	224	Extracellular (Secreted)	4.2	yes	no
SPSC_01821	scaffold00014	852890	853398	-1	no	0.134	112	Extracellular (Secreted)	4.9	yes	no
SPSC_01822	scaffold00014	854085	854543	-1	no	0.331	152	Plasma membrane	2.6	no	no
SPSC_01823	scaffold00014	855093	855957	-1	no	0.106	250	Cytoplasmic	3	no	no
SPSC_01824	scaffold00014	856717	857580	-1	no	0.124	203	Cytoplasmic	4.1	no	no
SPSC_01825	scaffold00014	858529	859750	-1	no	0.232	330	Membrane bound Mitochondrial	3.6	no	no
SPSC_01826	scaffold00014	861689	863841	-1	no	0.191	625	Nuclear	5.4	no	no
SPSC_01827	scaffold00014	864105	865614	1	no	0.102	470	Nuclear	10	no	no
SPSC_01828	scaffold00014	866508	867203	1	no	0.178	231	Nuclear	6.5	no	no
SPSC_01829	scaffold00014	867346	870009	-1	no	0.112	887	Nuclear	5.1	no	no
SPSC_01830	scaffold00014	870355	875445	1	no	0.102	1696	Cytoplasmic	3.1	no	no
SPSC_01831	scaffold00014	876457	877269	1	no	0.1	237	Mitochondrial	5.2	no	no
SPSC_01832	scaffold00014	877708	880200	1	no	0.104	830	Nuclear	5.3	no	no
SPSC_01833	scaffold00014	881672	886579	1	no	0.1	1635	Nuclear	4.7	no	no
SPSC_01834	scaffold00014	886785	887741	-1	no	0.146	318	Cytoplasmic	8.7	no	no
SPSC_01835	scaffold00014	888174	890604	-1	no	0.108	809	Nuclear	6.4	no	no
SPSC_01836	scaffold00014	891298	893643	1	no	0.171	781	Nuclear	5.5	no	no
SPSC_01837	scaffold00014	894045	894890	-1	yes	0.792	281	Membrane bound Extracellular (Secreted)	9.5	yes	no
SPSC_01838	scaffold00014	897059	905683	1	no	0.123	2874	Cytoplasmic	5.1	no	no
SPSC_01839	scaffold00014	906277	907959	1	no	0.169	560	Cytoplasmic	10	no	no
SPSC_01840	scaffold00014	908121	909149	-1	no	0.138	342	Membrane bound Mitochondrial	7	no	no
SPSC_01841	scaffold00014	912313	916099	1	no	0.101	1261	Cytoplasmic	3.6	no	no
SPSC_01842	scaffold00014	916689	917510	1	no	0.102	273	Mitochondrial	8.3	no	no
SPSC_01843	scaffold00014	917776	919983	-1	no	0.105	735	Nuclear	6.3	no	no
SPSC_01844	scaffold00014	920958	922563	-1	no	0.125	207	Mitochondrial	8.3	no	no
SPSC_01845	scaffold00014	923567	926167	-1	no	0.109	866	Nuclear	5	no	no
SPSC_01846	scaffold00014	928031	928939	-1	no	0.101	271	Endoplasmic reticulum	6.3	no	no
SPSC_01847	scaffold00014	932778	934277	-1	no	0.13	499	Membrane bound Mitochondrial	9.8	no	no
SPSC_01848	scaffold00014	935623	936921	-1	no	0.157	432	Membrane bound Mitochondrial	9.7	no	no
SPSC_01849	scaffold00014	937586	940261	1	no	0.139	891	Mitochondrial	9	no	no
SPSC_01850	scaffold00014	940356	942452	-1	no	0.106	698	Membrane bound Mitochondrial	10	no	no
SPSC_01851	scaffold00014	944586	945917	1	yes	0.796	443	Membrane bound Extracellular (Secreted)	2.7	yes	yes
SPSC_01852	scaffold00014	946311	948182	1	no	0.105	623	Cytoplasmic	4.7	no	no
SPSC_01853	scaffold00014	948305	949680	-1	no	0.101	372	Golgi	5.7	no	no
SPSC_01854	scaffold00014	949987	951339	1	no	0.118	450	Cytoplasmic	4.2	no	no
SPSC_01855	scaffold00014	951614	953997	-1	no	0.118	746	Membrane bound Mitochondrial	6.1	no	no
SPSC_01856	scaffold00014	955954	957603	1	no	0.115	549	Cytoplasmic	5.7	no	no
SPSC_01857	scaffold00014	957688	958344	-1	no	0.112	218	Membrane bound Mitochondrial	3.8	no	no
SPSC_01858	scaffold00014	958591	960768	1	no	0.106	725	Membrane bound Endoplasmic reticulum	10	no	no
SPSC_01859	scaffold00014	962107	965394	1	no	0.134	1095	Nuclear	6.4	no	no
SPSC_01860	scaffold00014	965548	969537	-1	no	0.163	1329	Cytoplasmic	2.6	no	no
SPSC_01861	scaffold00014	970376	971266	1	no	0.101	296	Nuclear	5.5	no	no
SPSC_01862	scaffold00014	971992	972813	1	no	0.121	273	Cytoplasmic	4.9	no	no
SPSC_01863	scaffold00014	972980	975436	-1	no	0.259	818	Membrane bound Mitochondrial	3.6	no	no
SPSC_01864	scaffold00014	976151	976978	-1	no	0.155	275	Nuclear	6.1	no	no
SPSC_01865	scaffold00014	977355	981170	1	no	0.099	1270	Cytoplasmic	2.2	no	no
SPSC_01866	scaffold00014	981280	987168	-1	no	0.103	1962	Plasma membrane	4.2	no	no
SPSC_01867	scaffold00014	987761	991441	1	no	0.104	1087	Cytoplasmic	3.9	no	no
SPSC_01868	scaffold00014	992173	993348	1	no	0.109	391	Membrane bound Mitochondrial	4.4	no	no
SPSC_01869	scaffold00014	993841	994467	-1	no	0.1	208	Nuclear	10	no	no
SPSC_01870	scaffold00014	994953	996131	-1	no	0.177	392	Plasma membrane	4.9	no	no
SPSC_01871	scaffold00014	996925	998157	1	no	0.285	410	Membrane bound Mitochondrial	10	no	no
SPSC_01872	scaffold00014	998237	1000483	-1	no	0.137	748	Nuclear	2.4	no	no
SPSC_01873	scaffold00014	1001165	1002475	1	no	0.104	370	Nuclear	3.3	no	no
SPSC_01874	scaffold00014	1002751	1003456	-1	no	0.105	176	Nuclear	4.3	no	no
SPSC_01875	scaffold00014	1003983	1005934	-1	no	0.114	613	Cytoplasmic	8.2	no	no
SPSC_01876	scaffold00014	1006778	1008217	1	no	0.101	479	Membrane bound Mitochondrial	3.5	no	no
SPSC_01877	scaffold00014	1008418	1010161	-1	no	0.15	449	Nuclear	4.7	no	no
SPSC_01878	scaffold00014	1010750	1011586	-1	no	0.118	278	Plasma membrane	9.4	no	no
SPSC_01879	scaffold00014	1012447	1015380	1	no	0.11	977	Membrane bound Golgi	8.8	no	no
SPSC_01880	scaffold00014	1015634	1017004	-1	no	0.106	456	Cytoplasmic	7.5	no	no
SPSC_01881	scaffold00014	1018243	1018628	-1	no	0.103	96	Nuclear	2.8	no	no
SPSC_01882	scaffold00014	1025295	1028282	1	no	0.113	995	Cytoplasmic	4.8	no	no
SPSC_01883	scaffold00014	1030312	1035237	-1	yes	0.901	1641	Plasma membrane	6.3	yes	yes
SPSC_01884	scaffold00014	1036141	1038711	-1	no	0.18	856	Membrane bound Vacuolar	9.6	no	no
SPSC_01885	scaffold00014	1039231	1041555	1	no	0.224	774	Plasma membrane	8.1	no	no
SPSC_01886	scaffold00014	1041874	1042813	1	no	0.104	287	Membrane bound Mitochondrial	2.4	no	no
SPSC_01887	scaffold00014	1043130	1043924	-1	no	0.237	264	Mitochondrial	9.8	no	no
SPSC_01888	scaffold00014	1044655	1045562	1	no	0.188	266	Membrane bound Mitochondrial	9.9	no	no
SPSC_01889	scaffold00014	1045866	1047920	-1	no	0.139	684	Membrane bound Mitochondrial	9.3	no	no
SPSC_01890	scaffold00014	1048982	1050286	-1	no	0.113	434	Nuclear	3.5	no	no
SPSC_01891	scaffold00014	1058060	1059988	1	no	0.132	642	Plasma membrane	6.2	no	no
SPSC_01892	scaffold00014	1060148	1061089	-1	yes	0.665	313	Membrane bound Mitochondrial	7	yes	yes
SPSC_01893	scaffold00014	1063263	1064516	1	yes	0.909	417	Extracellular (Secreted)	7.2	yes	yes
SPSC_01894	scaffold00014	1065163	1070118	1	no	0.167	1651	Plasma membrane	4.6	no	no
SPSC_01895	scaffold00014	1071127	1073307	1	no	0.118	726	Cytoplasmic	3.4	no	no
SPSC_01896	scaffold00014	1073982	1075832	-1	no	0.125	616	Nuclear	6.5	no	no
SPSC_01897	scaffold00014	1081291	1082967	-1	no	0.109	355	Membrane bound Mitochondrial	6	no	no
SPSC_01898	scaffold00014	1083336	1083572	1	no	0.162	78	Membrane bound Mitochondrial	8.5	no	no
SPSC_01899	scaffold00014	1084046	1089253	-1	no	0.102	1735	Nuclear	3.3	no	no
SPSC_01900	scaffold00014	1091632	1094610	-1	no	0.099	992	Cytoplasmic	6.1	no	no
SPSC_01901	scaffold00014	1095446	1096420	1	no	0.241	324	Membrane bound Mitochondrial	7.1	no	no
SPSC_01902	scaffold00014	1096827	1098197	-1	no	0.182	456	Cytoplasmic	3.8	no	no
SPSC_01903	scaffold00014	1099001	1099816	1	no	0.102	150	Cytoplasmic	8.8	no	no
SPSC_01904	scaffold00014	1101273	1103075	-1	no	0.112	600	Plasma membrane	2.3	no	no
SPSC_01905	scaffold00014	1103833	1105014	-1	no	0.174	393	Cytoplasmic	7	no	no
SPSC_01906	scaffold00014	1105504	1107645	-1	no	0.109	713	Cytoplasmic	3.1	no	no
SPSC_01907	scaffold00014	1108428	1110821	-1	no	0.165	797	Membrane bound Mitochondrial	9.3	no	no
SPSC_01908	scaffold00014	1111317	1112981	1	no	0.132	554	Membrane bound Endoplasmic reticulum	5.4	no	no
SPSC_01909	scaffold00014	1113086	1113706	-1	no	0.17	206	Golgi	9.7	no	no
SPSC_01910	scaffold00014	1114629	1116422	1	yes	0.816	597	Membrane bound Golgi	4.6	yes	yes
SPSC_01911	scaffold00014	1117099	1118688	1	no	0.104	529	Nuclear	4.1	no	no
SPSC_01912	scaffold00014	1119124	1121079	1	no	0.124	651	Nuclear	4.6	no	no
SPSC_01913	scaffold00014	1122320	1124875	1	no	0.115	851	Membrane bound Mitochondrial	5.8	no	no
SPSC_01914	scaffold00014	1125274	1126076	-1	no	0.125	151	Mitochondrial	5.7	no	no
SPSC_01915	scaffold00014	1128159	1128890	1	no	0.1	243	Cytoplasmic	7.7	no	no
SPSC_01916	scaffold00014	1131636	1134284	1	no	0.138	882	Membrane bound Mitochondrial	6.6	no	no
SPSC_01917	scaffold00014	1134680	1136008	-1	no	0.111	442	Nuclear	10	no	no
SPSC_01918	scaffold00014	1138060	1139508	1	yes	0.577	482	Plasma membrane	9.9	yes	no
SPSC_01919	scaffold00014	1139852	1142413	-1	no	0.177	853	Cytoplasmic	8.7	no	no
SPSC_01920	scaffold00014	1145165	1146214	1	no	0.12	322	Cytoplasmic	4.3	no	no
SPSC_01921	scaffold00014	1146729	1147096	-1	no	0.242	86	Membrane bound Mitochondrial	6.3	no	no
SPSC_01922	scaffold00014	1147587	1148849	-1	no	0.099	420	Nuclear	3.2	no	no
SPSC_01923	scaffold00014	1149212	1150254	1	no	0.163	318	Nuclear	4.4	no	no
SPSC_01924	scaffold00014	1150464	1153244	-1	no	0.102	926	Nuclear	5.6	no	no
SPSC_01925	scaffold00014	1154510	1154818	1	no	0.098	74	Mitochondrial	6	no	no
SPSC_01926	scaffold00014	1154929	1156134	-1	no	0.103	401	Nuclear	5.4	no	no
SPSC_01927	scaffold00014	1157791	1160487	1	no	0.106	898	Membrane bound Vacuolar	4.6	no	no
SPSC_01928	scaffold00014	1166224	1168332	1	no	0.106	702	Nuclear	6.2	no	no
SPSC_01929	scaffold00014	1168785	1172478	-1	no	0.113	1196	Plasma membrane	5.7	no	no
SPSC_01930	scaffold00014	1174363	1175346	1	no	0.112	327	Peroxisomal	5.7	no	no
SPSC_01931	scaffold00014	1175985	1176907	1	no	0.112	200	Mitochondrial	7.4	no	no
SPSC_01932	scaffold00014	1178024	1179070	1	no	0.157	348	Cytoplasmic	4.4	no	no
SPSC_01933	scaffold00014	1180289	1181577	1	no	0.115	358	Cytoplasmic	10	no	no
SPSC_01934	scaffold00014	1181783	1183705	-1	no	0.103	640	Nuclear	5.2	no	no
SPSC_01935	scaffold00014	1184333	1186654	1	no	0.141	773	Membrane bound Mitochondrial	9.9	no	no
SPSC_01936	scaffold00014	1186739	1188514	-1	no	0.102	591	Cytoplasmic	4	no	no
SPSC_01937	scaffold00014	1188757	1189054	1	no	0.121	54	Membrane bound Mitochondrial	7.6	no	no
SPSC_01938	scaffold00014	1189392	1194098	-1	no	0.114	1568	Nuclear	9.2	no	no
SPSC_01939	scaffold00014	1195411	1197144	1	no	0.101	577	Membrane bound Vacuolar	9.4	no	no
SPSC_01940	scaffold00014	1197525	1198573	1	no	0.105	317	Nuclear	5.6	no	no
SPSC_01941	scaffold00014	1198861	1199267	-1	no	0.115	106	Mitochondrial	9.9	no	no
SPSC_01942	scaffold00014	1199942	1201084	1	no	0.282	380	Membrane bound Peroxisomal	5.4	no	no
SPSC_01943	scaffold00014	1201153	1202550	-1	no	0.107	465	Membrane bound Mitochondrial	9.4	no	no
SPSC_01944	scaffold00014	1202755	1204314	1	no	0.375	519	Plasma membrane	2.7	no	no
SPSC_01945	scaffold00014	1204876	1206375	-1	no	0.104	499	Nuclear	9.9	no	no
SPSC_01946	scaffold00014	1207592	1208380	1	no	0.106	262	Nuclear	4.2	no	no
SPSC_01947	scaffold00014	1209326	1210435	1	no	0.105	369	Nuclear	4.2	no	no
SPSC_01948	scaffold00014	1211422	1212338	1	no	0.103	125	Cytoplasmic	4.5	no	no
SPSC_01949	scaffold00014	1213188	1215703	1	no	0.109	802	Nuclear	5.6	no	no
SPSC_01950	scaffold00014	1215800	1217017	-1	yes	0.741	405	Membrane bound Extracellular (Secreted)	7.3	yes	yes
SPSC_01951	scaffold00014	1217625	1219814	-1	no	0.109	729	Nuclear	6	no	no
SPSC_01952	scaffold00014	1220300	1221097	1	no	0.145	265	Membrane bound Extracellular (Secreted)	7.5	no	no
SPSC_01953	scaffold00014	1221334	1223970	-1	no	0.107	878	Nuclear	4.6	no	no
SPSC_01954	scaffold00014	1226315	1227115	-1	yes	0.789	266	Extracellular (Secreted)	6.1	yes	yes
SPSC_01955	scaffold00014	1229749	1231773	1	no	0.109	674	Nuclear	4.8	no	no
SPSC_01956	scaffold00014	1233666	1238642	1	no	0.129	1658	Membrane bound Vacuolar	7.6	no	no
SPSC_01957	scaffold00014	1239248	1240650	1	no	0.102	403	Mitochondrial	6.2	no	no
SPSC_01958	scaffold00014	1241445	1243553	1	yes	0.78	702	Extracellular (Secreted)	7.9	yes	yes
SPSC_01959	scaffold00014	1244728	1250730	-1	no	0.113	2000	Plasma membrane	4.2	no	no
SPSC_01960	scaffold00014	1252453	1254351	1	no	0.101	632	Nuclear	9.9	no	no
SPSC_01961	scaffold00014	1254622	1256134	-1	no	0.121	482	Plasma membrane	3.1	no	no
SPSC_01962	scaffold00014	1257131	1258837	1	no	0.117	568	Cytoplasmic	3.9	no	no
SPSC_01963	scaffold00014	1259768	1261324	-1	no	0.099	518	Cytoplasmic	2.7	no	no
SPSC_01964	scaffold00014	1261624	1263120	-1	no	0.099	498	Nuclear	6.1	no	no
SPSC_01965	scaffold00014	1263825	1265642	-1	no	0.131	572	Plasma membrane	4.4	no	no
SPSC_01966	scaffold00014	1266876	1272437	-1	no	0.103	1853	Cytoplasmic	4.3	no	no
SPSC_01967	scaffold00014	1274534	1275583	1	no	0.106	349	Cytoplasmic	10	no	no
SPSC_01968	scaffold00014	1276621	1277349	1	no	0.232	216	Mitochondrial	8.4	no	no
SPSC_01969	scaffold00014	1277489	1280392	-1	no	0.135	967	Membrane bound Mitochondrial	5.6	no	no
SPSC_01970	scaffold00014	1282615	1286988	1	no	0.107	1457	Cytoplasmic	6.9	no	no
SPSC_01971	scaffold00014	1288691	1291336	1	no	0.1	881	Membrane bound Vacuolar	3.9	no	no
SPSC_01972	scaffold00014	1292250	1294013	1	no	0.11	587	Membrane bound Lysosomal	8.5	no	no
SPSC_01973	scaffold00014	1294896	1295390	1	no	0.173	164	Membrane bound Mitochondrial	9.9	no	no
SPSC_01974	scaffold00014	1295686	1298343	-1	no	0.107	885	Nuclear	5.1	no	no
SPSC_01975	scaffold00014	1298707	1299498	1	no	0.107	263	Cytoplasmic	8.5	no	no
SPSC_01976	scaffold00014	1299764	1304656	-1	no	0.1	1630	Plasma membrane	8.6	no	no
SPSC_01977	scaffold00014	1306513	1308702	1	no	0.099	729	Nuclear	4.4	no	no
SPSC_01978	scaffold00014	1309113	1310111	1	yes	0.917	332	Extracellular (Secreted)	8.7	yes	yes
SPSC_01979	scaffold00014	1310341	1311435	-1	no	0.102	364	Nuclear	7.2	no	no
SPSC_01980	scaffold00014	1311757	1312247	1	no	0.101	83	Mitochondrial	9.8	no	no
SPSC_01981	scaffold00014	1313277	1313995	1	no	0.149	211	Plasma membrane	7.1	no	no
SPSC_01982	scaffold00014	1314859	1316388	1	no	0.218	509	Membrane bound Mitochondrial	10	no	no
SPSC_01983	scaffold00014	1317483	1317905	1	no	0.208	140	Plasma membrane	3.3	no	no
SPSC_01984	scaffold00014	1318460	1320388	-1	no	0.101	642	Plasma membrane	7.4	no	no
SPSC_01985	scaffold00014	1321460	1326628	1	no	0.107	1722	Cytoplasmic	8	no	no
SPSC_01986	scaffold00014	1326775	1327821	-1	no	0.195	348	Cytoplasmic	8.8	no	no
SPSC_01987	scaffold00014	1328411	1330303	1	no	0.138	630	Nuclear	5.7	no	no
SPSC_01988	scaffold00014	1330468	1331925	-1	yes	0.711	485	Membrane bound Extracellular (Secreted)	7.6	yes	yes
SPSC_01989	scaffold00014	1335448	1336905	1	no	0.147	485	Plasma membrane	9.9	no	no
SPSC_01990	scaffold00014	1337274	1338266	-1	no	0.109	330	Nuclear	6.4	no	no
SPSC_01991	scaffold00014	1338853	1339933	-1	no	0.201	328	Membrane bound Mitochondrial	9.7	no	no
SPSC_01992	scaffold00014	1340265	1345301	-1	no	0.105	1678	Plasma membrane	4.5	no	no
SPSC_01993	scaffold00014	1348094	1350067	1	no	0.106	657	Nuclear	5.3	no	no
SPSC_01994	scaffold00014	1350162	1356965	-1	no	0.107	2267	Cytoplasmic	4.3	no	no
SPSC_01995	scaffold00014	1357785	1358901	1	no	0.146	344	Cytoplasmic	7.3	no	no
[truncated: 4,702 more rows]

## Sheet: S. reilianum
Name	Chr	Begin	End	Strand	Secreted	D	Length	Location	Score	CSEP relaxed	CSEP strict
sr00846.2	chr01	598	1537	-1	yes	0.776	248	Extracellular (Secreted)	8.3	yes	yes
sr00845	chr01	2237	3370	-1	no	0.145	377	Cytoplasmic	5	no	no
sr00843	chr01	5585	6997	1	no	0.11	470	Mitochondrial	5.6	no	no
sr00842.2	chr01	7192	8184	-1	no	0.108	330	Cytoplasmic	3.1	no	no
sr00841.2	chr01	8550	9611	-1	no	0.157	353	Cytoplasmic	8.9	no	no
sr00840.2	chr01	10093	11417	-1	no	0.494	412	Membrane bound Endoplasmic reticulum	8.9	no	no
sr00838.2	chr01	11884	14389	-1	no	0.112	808	Nuclear	4.1	no	no
sr20011	chr01	15937	16788	1	no	0.146	283	Cytoplasmic	2.9	no	no
sr06455	chr01	16881	18116	-1	no	0.321	384	Plasma membrane	3	no	no
sr06454	chr01	19124	19405	1	no	0.286	57	Golgi	3.6	no	no
sr06453	chr01	19785	20636	-1	no	0.121	283	Membrane bound Mitochondrial	7.7	no	no
sr06452	chr01	21433	22695	1	no	0.123	420	Mitochondrial	5.9	no	no
sr06451	chr01	23310	24860	1	no	0.132	516	Nuclear	6	no	no
sr06448	chr01	24916	25835	-1	no	0.125	279	Membrane bound Mitochondrial	5.7	no	no
sr06446	chr01	27124	28456	1	no	0.138	404	Nuclear	6.2	no	no
sr06445	chr01	28939	30213	1	no	0.099	424	Nuclear	5.7	no	no
sr20010	chr01	30423	31280	1	no	0.113	285	Nuclear	5.3	no	no
sr06444	chr01	31308	33929	-1	yes	0.619	873	Membrane bound Extracellular (Secreted)	4.7	yes	yes
sr06443	chr01	34764	35342	-1	no	0.121	192	Membrane bound Mitochondrial	6.1	no	no
sr06441	chr01	36223	37113	-1	no	0.353	296	Membrane bound Mitochondrial	6.2	no	no
sr06440	chr01	38078	39670	1	no	0.1	530	Plasma membrane	9.9	no	no
sr06439	chr01	39781	42043	-1	no	0.107	728	Membrane bound Mitochondrial	7.5	no	no
sr06437	chr01	43902	44804	1	yes	0.681	300	Membrane bound Extracellular (Secreted)	8.9	yes	no
sr06435	chr01	45205	45825	1	no	0.143	206	Nuclear	4	no	no
sr06434.2	chr01	45907	47586	-1	no	0.139	559	Cytoplasmic	8.6	no	no
sr06433	chr01	48327	50108	-1	no	0.225	593	Membrane bound Mitochondrial	7	no	no
sr06432	chr01	50728	51407	1	no	0.101	197	Cytoplasmic	9	no	no
sr06431.2	chr01	51881	53017	1	no	0.153	378	Membrane bound Mitochondrial	7.2	no	no
sr06429	chr01	53181	54050	-1	no	0.129	289	Membrane bound Endoplasmic reticulum	7.6	no	no
sr06428	chr01	55007	57310	1	no	0.115	767	Membrane bound Endoplasmic reticulum	5.3	no	no
sr06427	chr01	58375	60050	1	no	0.123	534	Cytoplasmic	3.6	no	no
sr06426.2	chr01	61770	62825	1	no	0.124	351	Cytoplasmic	2.7	no	no
sr06425	chr01	63342	65291	-1	no	0.107	649	Plasma membrane	5	no	no
sr06424	chr01	66072	67673	1	no	0.189	533	Membrane bound Mitochondrial	6	no	no
sr06423	chr01	67894	68892	-1	no	0.128	332	Cytoplasmic	3.7	no	no
sr06422	chr01	70185	71717	-1	no	0.095	510	Plasma membrane	9.7	no	no
sr06421	chr01	72815	74077	1	yes	0.497	420	Membrane bound Mitochondrial	8.7	yes	no
sr06420	chr01	74194	75588	-1	no	0.113	464	Membrane bound Mitochondrial	7.8	no	no
sr06418	chr01	75822	76445	1	no	0.104	207	Membrane bound Mitochondrial	9.4	no	no
sr06417	chr01	77570	78187	1	no	0.107	205	Extracellular (Secreted)	6.5	yes	no
sr06414	chr01	82649	84244	1	no	0.099	531	Membrane bound Vacuolar	8.9	no	no
sr06413	chr01	84826	85693	1	no	0.122	262	Cytoplasmic	3.6	no	no
sr06412	chr01	85948	86628	-1	no	0.108	226	Cytoplasmic	8.2	no	no
sr06410	chr01	88159	88970	1	no	0.106	189	Membrane bound Mitochondrial	5	no	no
sr06409	chr01	89152	90147	-1	no	0.13	331	Cytoplasmic	8.8	no	no
sr06408	chr01	91442	93418	-1	no	0.147	658	Membrane bound Mitochondrial	9.6	no	no
sr06407	chr01	94717	96243	1	no	0.238	508	Plasma membrane	6.5	no	no
sr06406	chr01	96604	97159	1	yes	0.924	150	Membrane bound Extracellular (Secreted)	6.6	yes	yes
sr06404	chr01	97822	101688	1	no	0.1	1288	Nuclear	6.2	no	no
sr06403.2	chr01	103144	104964	1	no	0.101	605	Plasma membrane	5.3	no	no
sr06401	chr01	105376	106154	1	no	0.244	235	Mitochondrial	10	no	no
sr06400	chr01	106709	107359	-1	no	0.173	216	Membrane bound Mitochondrial	7.4	no	no
sr11368	chr01	108354	110018	-1	no	0.099	554	Cytoplasmic	6.4	no	no
sr11369	chr01	110960	111901	-1	no	0.109	313	Membrane bound Mitochondrial	3.3	no	no
sr11370	chr01	112188	113126	-1	no	0.116	288	Nuclear	3.5	no	no
sr11371	chr01	113391	115190	1	yes	0.519	599	Membrane bound Mitochondrial	6.3	yes	yes
sr11372	chr01	115635	117725	1	no	0.23	696	Membrane bound Mitochondrial	9	no	no
sr11373	chr01	117897	121016	-1	no	0.116	1022	Cytoplasmic	3.6	no	no
sr11374	chr01	122613	123941	-1	no	0.103	442	Membrane bound Endoplasmic reticulum	6.9	no	no
sr11375	chr01	124275	125315	1	no	0.11	346	Cytoplasmic	4.9	no	no
sr11376	chr01	125448	126827	-1	no	0.118	459	Cytoplasmic	5.8	no	no
sr11377	chr01	127487	128074	-1	no	0.117	195	Nuclear	3.4	no	no
sr11378	chr01	128585	129325	1	no	0.182	246	Membrane bound Mitochondrial	7.3	no	no
sr11379	chr01	129510	130006	-1	no	0.11	144	Membrane bound Mitochondrial	9.3	no	no
sr11380	chr01	130699	131739	-1	no	0.252	346	Membrane bound Extracellular (Secreted)	4	no	no
sr11381	chr01	133890	134309	-1	no	0.1	139	Membrane bound Extracellular (Secreted)	8.7	no	no
sr11382	chr01	135422	137461	-1	no	0.119	679	Cytoplasmic	3.3	no	no
sr11383	chr01	138429	139646	-1	no	0.104	405	Membrane bound Mitochondrial	4	no	no
sr11384	chr01	140524	141184	-1	no	0.14	159	Membrane bound Mitochondrial	5.9	no	no
sr11385	chr01	141646	142767	-1	yes	0.724	373	Membrane bound Extracellular (Secreted)	4.8	yes	yes
sr11386	chr01	143109	144713	-1	no	0.102	534	Plasma membrane	7.5	no	no
sr11387	chr01	147385	148890	1	no	0.099	501	Plasma membrane	9.9	no	no
sr11388	chr01	149267	149908	1	no	0.103	213	Nuclear	3.8	no	no
sr11389	chr01	150152	152425	-1	no	0.101	757	Plasma membrane	2.3	no	no
sr11390	chr01	154991	156547	-1	no	0.107	518	Membrane bound Endoplasmic reticulum	5.3	no	no
sr11391	chr01	157812	158789	-1	no	0.294	325	Cytoplasmic	4.7	no	no
sr11392	chr01	161244	163067	1	no	0.101	607	Plasma membrane	4.9	no	no
sr11393	chr01	163517	164959	-1	yes	0.914	480	Membrane bound Vacuolar	4	yes	yes
sr11394	chr01	167023	168204	-1	yes	0.78	393	Membrane bound Extracellular (Secreted)	6.5	yes	yes
sr11395	chr01	171132	171781	-1	no	0.111	131	Membrane bound Mitochondrial	9.8	no	no
sr11396	chr01	173459	175396	1	no	0.113	645	Membrane bound Mitochondrial	4.2	no	no
sr11397	chr01	175470	182141	-1	no	0.216	2223	Plasma membrane	4.6	no	no
sr11398	chr01	182844	185543	-1	no	0.102	899	Plasma membrane	5.2	no	no
sr11399	chr01	186455	189958	1	no	0.106	1167	Nuclear	5.1	no	no
sr11400	chr01	190369	190896	1	yes	0.841	175	Extracellular (Secreted)	9.7	yes	yes
sr11401	chr01	191297	191824	1	yes	0.776	152	Extracellular (Secreted)	5.6	yes	yes
sr11402	chr01	192253	192814	1	yes	0.548	131	Extracellular (Secreted)	8.1	yes	yes
sr11403	chr01	193043	195304	-1	no	0.194	753	Membrane bound Endoplasmic reticulum	5.8	no	no
sr11404	chr01	195849	196976	1	no	0.171	375	Membrane bound Mitochondrial	2.8	no	no
sr11405	chr01	198077	199546	1	no	0.444	489	Membrane bound Extracellular (Secreted)	6.2	no	no
sr11406	chr01	199964	201529	1	no	0.112	521	Membrane bound Endoplasmic reticulum	9.4	no	no
sr11407	chr01	201554	202141	-1	no	0.148	195	Membrane bound Mitochondrial	3.3	no	no
sr11408	chr01	202490	203158	1	no	0.118	222	Mitochondrial	5.7	no	no
sr11409	chr01	203275	206353	-1	no	0.225	873	Membrane bound Mitochondrial	3.8	no	no
sr11410	chr01	207662	209446	1	no	0.107	594	Plasma membrane	9.3	no	no
sr11411	chr01	209610	210183	-1	yes	0.85	163	Membrane bound Mitochondrial	8.9	yes	no
sr11412	chr01	211489	213054	1	no	0.122	521	Membrane bound Mitochondrial	7.8	no	no
sr11413	chr01	213127	215301	-1	no	0.114	724	Cytoplasmic	10	no	no
sr11414	chr01	216133	217149	-1	no	0.31	338	Membrane bound Mitochondrial	7.2	no	no
sr11415	chr01	217759	219720	-1	no	0.141	653	Nuclear	2.9	no	no
sr11416	chr01	220304	221098	-1	yes	0.862	264	Membrane bound Extracellular (Secreted)	9.4	yes	no
sr11417	chr01	223035	224294	1	no	0.12	419	Nuclear	6.5	no	no
sr11418	chr01	225444	226474	1	no	0.136	313	Membrane bound Endoplasmic reticulum	5.8	no	no
sr11419	chr01	226822	229824	1	no	0.132	1000	Membrane bound Mitochondrial	7.2	no	no
sr11420	chr01	229883	231364	-1	no	0.197	439	Cytoplasmic	3.7	no	no
sr11421	chr01	231677	232672	1	no	0.379	331	Membrane bound Mitochondrial	4.8	no	no
sr11422	chr01	232837	233793	-1	no	0.218	318	Plasma membrane	8	no	no
sr11423	chr01	234279	236846	1	no	0.133	855	Nuclear	5.7	no	no
sr11424	chr01	236910	237833	-1	no	0.164	307	Plasma membrane	2.8	no	no
sr11425	chr01	238657	239001	-1	no	0.113	114	Mitochondrial	5.4	no	no
sr11426	chr01	239416	240777	1	no	0.101	453	Nuclear	6.2	no	no
sr11427	chr01	240874	241876	-1	no	0.124	306	Membrane bound Peroxisomal	9.2	no	no
sr11428	chr01	242626	243442	1	no	0.148	214	Cytoplasmic	5.5	no	no
sr11429	chr01	243883	245691	1	no	0.122	602	Membrane bound Endoplasmic reticulum	7.9	no	no
sr11430	chr01	245862	246569	-1	no	0.22	235	Cytoplasmic	3.9	no	no
sr11431	chr01	246928	247710	1	no	0.186	260	Membrane bound Mitochondrial	4.2	no	no
sr11432	chr01	249321	250403	1	no	0.138	360	Plasma membrane	4.5	no	no
sr11433	chr01	250865	251422	1	no	0.103	185	Nuclear	3.3	no	no
sr11434	chr01	252409	252936	1	no	0.161	175	Mitochondrial	7.3	no	no
sr11435	chr01	253578	254330	1	no	0.099	250	Nuclear	5.5	no	no
sr11436	chr01	254553	256322	-1	no	0.315	589	Membrane bound Mitochondrial	5.7	no	no
sr11437	chr01	257039	258604	1	yes	0.607	521	Plasma membrane	4.6	yes	yes
sr11438	chr01	259299	261386	1	no	0.107	695	Nuclear	7.3	no	no
sr11439	chr01	261669	262529	1	no	0.118	286	Nuclear	8.5	no	no
sr11440	chr01	262999	265494	1	no	0.122	831	Membrane bound Mitochondrial	3.7	no	no
sr11441	chr01	267887	268963	1	yes	0.893	302	Extracellular (Secreted)	8	yes	yes
sr11442	chr01	269686	271179	1	no	0.116	497	Plasma membrane	8.6	no	no
sr01840	chr01	273134	275098	-1	no	0.107	622	Nuclear	4.5	no	no
sr11443	chr01	275760	276925	1	no	0.107	299	Nuclear	4.5	no	no
sr11444	chr01	277320	279746	-1	yes	0.923	808	Nuclear	5.4	yes	yes
sr11445	chr01	280445	282337	-1	yes	0.852	630	Plasma membrane	10	yes	no
sr11446	chr01	284542	286071	1	no	0.294	484	Plasma membrane	8.1	no	no
sr11447	chr01	286259	287345	-1	yes	0.757	271	Membrane bound Endoplasmic reticulum	7.2	yes	yes
sr11448	chr01	287773	288894	-1	no	0.209	373	Membrane bound Mitochondrial	8.4	no	no
sr11449	chr01	290935	292944	1	no	0.103	616	Cytoplasmic	7.3	no	no
sr11450	chr01	294092	295876	1	no	0.103	594	Nuclear	3.2	no	no
sr11451	chr01	295943	296743	-1	no	0.193	244	Membrane bound Peroxisomal	5.1	no	no
sr11452	chr01	298097	300094	1	no	0.103	547	Membrane bound Mitochondrial	5.7	no	no
sr11453	chr01	303270	306616	1	no	0.105	1063	Cytoplasmic	3	no	no
sr11454	chr01	306869	308143	-1	no	0.13	424	Nuclear	10	no	no
sr11455	chr01	308514	309659	1	no	0.125	355	Cytoplasmic	6	no	no
sr11456	chr01	310169	311401	1	no	0.132	410	Membrane bound Mitochondrial	8.6	no	no
sr11457	chr01	311482	313098	-1	no	0.102	538	Plasma membrane	9	no	no
sr11458	chr01	313804	315834	-1	no	0.12	676	Membrane bound Mitochondrial	5.3	no	no
sr11459	chr01	316994	318508	1	no	0.104	504	Membrane bound Mitochondrial	3.2	no	no
sr11460	chr01	318725	320509	-1	no	0.214	594	Membrane bound Mitochondrial	5.7	no	no
sr11461	chr01	321152	322447	1	no	0.155	431	Membrane bound Mitochondrial	7.4	no	no
sr11462	chr01	322795	323348	1	no	0.11	161	Membrane bound Extracellular (Secreted)	8.6	no	no
sr11463	chr01	323478	325433	-1	no	0.136	651	Membrane bound Mitochondrial	5.8	no	no
sr11464	chr01	325870	327630	-1	no	0.121	586	Membrane bound Mitochondrial	9.7	no	no
sr11465	chr01	328333	329757	-1	no	0.119	474	Nuclear	6.4	no	no
sr11466	chr01	332128	333114	1	no	0.103	328	Nuclear	5.8	no	no
sr11467	chr01	333183	334977	-1	no	0.144	574	Nuclear	5.7	no	no
sr11468	chr01	335988	337565	1	no	0.125	525	Cytoplasmic	2.6	no	no
sr11469	chr01	337708	339720	-1	no	0.131	670	Nuclear	4.7	no	no
sr11470	chr01	341590	343194	1	no	0.106	534	Extracellular (Secreted)	6.2	yes	no
sr11471	chr01	343433	344525	1	no	0.129	308	Membrane bound Mitochondrial	2.7	no	no
sr11472	chr01	344620	346113	-1	yes	0.682	497	Extracellular (Secreted)	8.3	yes	yes
sr11473	chr01	346820	347746	1	no	0.182	234	Cytoplasmic	10	no	no
sr11474	chr01	347833	349068	-1	no	0.127	411	Membrane bound Mitochondrial	8	no	no
sr11475	chr01	353323	354849	1	no	0.194	508	Nuclear	4.3	no	no
sr11476	chr01	356493	358832	-1	no	0.102	779	Nuclear	4.6	no	no
sr11477	chr01	359664	360719	1	no	0.111	351	Membrane bound Mitochondrial	5.1	no	no
sr11478	chr01	362347	363957	-1	no	0.245	536	Endoplasmic reticulum	3.2	no	no
sr11479	chr01	365054	365900	1	no	0.129	256	Nuclear	4.4	no	no
sr11480	chr01	365944	368043	-1	no	0.11	699	Nuclear	7	no	no
sr11481	chr01	368426	370525	1	no	0.136	699	Nuclear	5	no	no
sr11482	chr01	370838	372253	-1	no	0.143	471	Mitochondrial	10	no	no
sr11483	chr01	373125	375962	1	no	0.106	945	Nuclear	9.8	no	no
sr11484	chr01	376264	377352	-1	no	0.217	362	Cytoplasmic	5.3	no	no
sr11485	chr01	377941	381960	1	no	0.117	1339	Cytoplasmic	3.5	no	no
sr11486	chr01	382447	382774	-1	no	0.14	78	Membrane bound Mitochondrial	8.5	no	no
sr11487	chr01	383267	383924	1	no	0.112	95	Membrane bound Mitochondrial	5.4	no	no
sr11488	chr01	386208	387614	1	yes	0.788	468	Membrane bound Extracellular (Secreted)	5.7	yes	yes
sr11489	chr01	387959	389998	-1	no	0.122	592	Nuclear	6	no	no
sr11490	chr01	390319	391006	-1	no	0.119	52	Membrane bound Mitochondrial	9.7	no	no
sr11491	chr01	391419	393825	1	no	0.152	732	Membrane bound Mitochondrial	5.8	no	no
sr11492	chr01	394315	395149	1	no	0.102	224	Cytoplasmic	7.8	no	no
sr11493	chr01	395799	398065	1	no	0.11	661	Membrane bound Mitochondrial	3.5	no	no
sr11494	chr01	395799	397301	1	no	0.11	500	Nuclear	5.5	no	no
sr11495	chr01	399292	405204	1	no	0.111	1970	Cytoplasmic	3.9	no	no
sr11496	chr01	407051	410016	1	no	0.145	912	Membrane bound Peroxisomal	8.5	no	no
sr11497	chr01	410758	412581	1	no	0.22	607	Membrane bound Mitochondrial	8.4	no	no
sr11498	chr01	412955	415291	-1	no	0.201	778	Nuclear	5.2	no	no
sr11499	chr01	416146	416788	1	no	0.194	119	Membrane bound Mitochondrial	7.1	no	no
sr11500	chr01	417146	419254	-1	no	0.477	702	Plasma membrane	7.6	no	no
sr11501	chr01	421476	422552	1	no	0.135	291	Nuclear	5.6	no	no
sr11502	chr01	423525	424573	-1	no	0.114	322	Membrane bound Peroxisomal	3	no	no
sr11503	chr01	426006	427595	1	no	0.112	529	Cytoplasmic	5.5	no	no
sr11504	chr01	429720	430802	1	no	0.118	360	Membrane bound Endoplasmic reticulum	6.5	no	no
sr11505	chr01	431305	432315	-1	yes	0.64	336	Membrane bound Lysosomal	8.7	yes	no
sr11506	chr01	432777	433713	1	no	0.112	288	Plasma membrane	8.6	no	no
sr11507	chr01	433840	435669	-1	no	0.128	609	Nuclear	6.6	no	no
sr11508	chr01	436423	437283	-1	no	0.117	259	Cytoplasmic	2.7	no	no
sr11509	chr01	437565	438359	1	no	0.204	264	Cytoplasmic	10	no	no
sr11510	chr01	439098	441251	-1	no	0.108	659	Nuclear	6.8	no	no
sr11511	chr01	442087	443700	1	no	0.264	537	Membrane bound Mitochondrial	4.8	no	no
sr11512	chr01	443799	444963	-1	no	0.17	364	Membrane bound Mitochondrial	2.9	no	no
sr11513	chr01	446092	448101	1	no	0.118	669	Plasma membrane	8.1	no	no
sr11514	chr01	448256	451498	-1	no	0.105	1080	Cytoplasmic	4.9	no	no
sr11534	chr01	453015	457208	1	no	0.103	1397	Membrane bound Vacuolar	9.1	no	no
sr11533	chr01	457584	458252	-1	no	0.144	77	Membrane bound Mitochondrial	8.5	no	no
sr11532	chr01	458695	460005	1	no	0.102	436	Nuclear	4.8	no	no
sr11531	chr01	460382	462073	1	no	0.123	563	Membrane bound Mitochondrial	5.8	no	no
sr11530	chr01	462193	463944	-1	yes	0.773	583	Membrane bound Mitochondrial	3	yes	yes
sr11529	chr01	466261	469974	1	no	0.112	1237	Plasma membrane	4.6	no	no
sr11528	chr01	470165	471574	-1	no	0.102	469	Membrane bound Mitochondrial	6.9	no	no
sr11527	chr01	472157	473518	-1	no	0.111	453	Nuclear	6.6	no	no
sr11526	chr01	473961	475886	1	no	0.102	641	Nuclear	9.8	no	no
sr11525	chr01	476061	477353	-1	no	0.136	430	Cytoplasmic	3.5	no	no
sr11524	chr01	477846	479864	-1	no	0.119	672	Membrane bound Endoplasmic reticulum	9.3	no	no
sr11523	chr01	480473	481378	-1	no	0.121	301	Cytoplasmic	10	no	no
sr11522	chr01	482540	487732	1	no	0.106	1730	Nuclear	2.6	no	no
sr11521	chr01	488098	488764	1	no	0.115	196	Membrane bound Extracellular (Secreted)	6.7	no	no
sr11520	chr01	488884	490746	-1	no	0.122	620	Plasma membrane	5.2	no	no
sr11519	chr01	491186	493099	-1	no	0.282	637	Membrane bound Mitochondrial	8.5	no	no
sr11518	chr01	493549	494178	-1	no	0.307	209	Extracellular (Secreted)	4.6	yes	no
sr11517	chr01	495951	498010	1	no	0.12	631	Cytoplasmic	10	no	no
sr11516	chr01	498265	499734	1	no	0.108	489	Mitochondrial	3.6	no	no
sr11515	chr01	499914	501352	-1	no	0.131	447	Cytoplasmic	10	no	no
sr11535	chr01	504212	505105	1	no	0.101	297	Nuclear	5.7	no	no
sr11536	chr01	505908	508568	1	no	0.113	886	Nuclear	5.8	no	no
sr11537	chr01	508851	509398	-1	no	0.268	103	Nuclear	9.1	no	no
sr11538	chr01	509635	510615	1	no	0.106	326	Cytoplasmic	5.6	no	no
sr11539	chr01	510854	512503	-1	no	0.133	549	Membrane bound Mitochondrial	4.3	no	no
sr11540	chr01	514917	516923	1	no	0.134	668	Membrane bound Mitochondrial	7.6	no	no
sr11541	chr01	519705	523010	1	no	0.118	1101	Nuclear	3.6	no	no
sr11542	chr01	523854	524570	-1	no	0.108	238	Plasma membrane	5.3	no	no
sr11543	chr01	526615	530445	-1	no	0.103	1276	Nuclear	2.2	no	no
sr11544	chr01	532569	533043	-1	no	0.1	127	Cytoplasmic	9	no	no
sr11545	chr01	534936	536144	-1	no	0.148	402	Cytoplasmic	9.9	no	no
sr11546	chr01	539209	542241	1	yes	0.795	1010	Plasma membrane	6.4	yes	yes
sr11547	chr01	543236	544075	1	no	0.175	279	Membrane bound Mitochondrial	7.9	no	no
sr11548	chr01	544305	546098	-1	no	0.193	597	Plasma membrane	3.5	no	no
sr11549	chr01	546868	548245	-1	no	0.119	395	Cytoplasmic	2.6	no	no
sr11550	chr01	549561	552935	1	no	0.117	1124	Plasma membrane	9.6	no	no
sr11551	chr01	554672	555015	1	no	0.101	80	Nuclear	6.8	no	no
sr11552	chr01	555219	557955	-1	no	0.104	693	Membrane bound Vacuolar	9.6	no	no
sr11553	chr01	558048	559748	1	no	0.105	566	Membrane bound Mitochondrial	9.4	no	no
sr11554	chr01	559899	562283	-1	no	0.106	794	Nuclear	2.9	no	no
sr11555	chr01	563369	563944	1	no	0.108	191	Nuclear	6.6	no	no
sr11556	chr01	564134	565414	-1	no	0.365	426	Membrane bound Mitochondrial	9.5	no	no
sr11557	chr01	566212	567462	1	no	0.171	416	Nuclear	6.3	no	no
sr11558	chr01	567732	568634	-1	no	0.187	207	Membrane bound Endoplasmic reticulum	9.1	no	no
sr11559	chr01	569105	569873	1	no	0.104	229	Nuclear	7.5	no	no
sr11560	chr01	569993	572797	-1	no	0.108	934	Nuclear	5.4	no	no
sr11561	chr01	573639	575825	-1	no	0.109	728	Membrane bound Mitochondrial	6.9	no	no
sr11562	chr01	577329	577535	1	no	0.101	68	Nuclear	4.8	no	no
sr11563	chr01	578409	580106	1	no	0.212	565	Membrane bound Mitochondrial	9.8	no	no
sr11564	chr01	580190	581803	-1	no	0.105	537	Membrane bound Mitochondrial	7.2	no	no
sr11565	chr01	582164	583321	-1	no	0.106	385	Mitochondrial	6.5	no	no
sr11566	chr01	584080	586977	1	no	0.115	965	Nuclear	6.3	no	no
sr11567	chr01	587103	589010	-1	no	0.101	635	Nuclear	9.9	no	no
sr11568	chr01	589448	591502	-1	no	0.106	684	Membrane bound Endoplasmic reticulum	5.3	no	no
sr11569	chr01	593252	593504	-1	no	0.103	53	Nuclear	7.2	no	no
sr11570	chr01	593828	594592	-1	no	0.254	254	Plasma membrane	8.6	no	no
sr11571	chr01	595268	596892	-1	no	0.113	514	Membrane bound Endoplasmic reticulum	5.8	no	no
sr11572	chr01	598707	601232	1	yes	0.643	841	Plasma membrane	6.2	yes	yes
sr11573	chr01	602581	603831	1	no	0.1	416	Membrane bound Mitochondrial	5.1	no	no
sr11574	chr01	604097	605310	-1	no	0.134	345	Golgi	2.8	no	no
sr11575	chr01	605707	606594	1	yes	0.694	295	Membrane bound Mitochondrial	6.1	yes	yes
sr11576	chr01	606913	607680	1	no	0.28	255	Membrane bound Extracellular (Secreted)	7	no	no
sr11577	chr01	607848	611009	-1	no	0.105	1053	Nuclear	6.5	no	no
sr11578	chr01	611571	612620	1	no	0.117	318	Cytoplasmic	3.9	no	no
sr11579	chr01	612794	615997	-1	no	0.111	1067	Membrane bound Endoplasmic reticulum	8.6	no	no
sr11580	chr01	619473	620408	1	no	0.106	311	Nuclear	7.4	no	no
sr11581	chr01	623623	624822	1	no	0.145	399	Nuclear	5.6	no	no
sr11582	chr01	625175	626836	-1	no	0.263	553	Cytoplasmic	3.5	no	no
sr11583	chr01	627239	628399	-1	no	0.204	386	Mitochondrial	5.7	no	no
sr11584	chr01	629227	630520	1	no	0.125	404	Membrane bound Mitochondrial	3.4	no	no
sr11585	chr01	630683	632242	-1	no	0.212	519	Nuclear	5.8	no	no
sr11586	chr01	632565	633637	1	no	0.102	327	Cytoplasmic	4.6	no	no
sr11587	chr01	633904	635400	-1	yes	0.754	464	Membrane bound Extracellular (Secreted)	9.7	yes	no
sr11588	chr01	639933	643217	1	no	0.102	1094	Cytoplasmic	9.9	no	no
sr11589	chr01	645382	649932	1	no	0.114	1516	Cytoplasmic	5.8	no	no
sr11590	chr01	650596	655626	-1	no	0.1	1676	Cytoplasmic	5.8	no	no
sr11591	chr01	656357	656988	-1	no	0.236	136	Mitochondrial	7.4	no	no
sr11592	chr01	657378	660509	1	no	0.15	1043	Membrane bound Mitochondrial	7.6	no	no
sr11593	chr01	660715	661893	-1	no	0.103	392	Nuclear	4.8	no	no
sr11594	chr01	663194	666034	-1	no	0.102	946	Nuclear	6.8	no	no
sr11595	chr01	666249	666823	1	no	0.105	165	Cytoplasmic	5.4	no	no
sr11596	chr01	668269	669315	1	no	0.102	348	Membrane bound Extracellular (Secreted)	6.2	no	no
sr11597	chr01	669638	670813	-1	no	0.145	336	Membrane bound Mitochondrial	9.8	no	no
sr11598	chr01	671428	672790	1	no	0.164	110	Cytoplasmic	9.3	no	no
sr11599	chr01	673350	675257	-1	no	0.137	609	Membrane bound Peroxisomal	8.4	no	no
sr11600	chr01	675610	677247	-1	no	0.154	522	Plasma membrane	9.2	no	no
sr11601	chr01	677667	679691	-1	no	0.102	674	Mitochondrial	8.9	no	no
sr11602	chr01	680173	682827	1	no	0.119	884	Membrane bound Extracellular (Secreted)	3	no	no
sr11603	chr01	683436	684521	-1	yes	0.747	335	Nuclear	8	yes	no
sr11604	chr01	686350	688248	-1	no	0.103	632	Nuclear	4.1	no	no
sr11605	chr01	691710	692990	-1	no	0.167	350	Nuclear	5.6	no	no
sr11606	chr01	693879	695801	1	no	0.123	640	Nuclear	4.4	no	no
sr11607	chr01	696590	697767	1	no	0.123	266	Mitochondrial	4.2	no	no
sr11608	chr01	697884	701177	-1	no	0.461	1041	Plasma membrane	4	no	no
sr11609	chr01	701785	703446	1	no	0.104	553	Membrane bound Golgi	4.1	no	no
sr11610	chr01	703685	705385	-1	no	0.316	566	Cytoplasmic	10	no	no
sr11611	chr01	705864	706642	1	no	0.19	165	Mitochondrial	9.1	no	no
sr11612	chr01	711036	712231	1	no	0.182	369	Membrane bound Golgi	9.7	no	no
sr11613	chr01	713133	714521	1	no	0.102	434	Membrane bound Mitochondrial	9.4	no	no
sr11614	chr01	714841	715649	-1	no	0.165	242	Mitochondrial	8.1	no	no
sr11615	chr01	715944	718496	-1	no	0.115	850	Nuclear	5.2	no	no
sr11616	chr01	719460	720509	-1	no	0.416	349	Membrane bound Mitochondrial	8.7	no	no
sr11617	chr01	721165	722123	-1	no	0.1	291	Nuclear	6.8	no	no
sr11618	chr01	722538	723692	1	no	0.129	384	Membrane bound Mitochondrial	2.4	no	no
sr11619	chr01	723778	725511	-1	no	0.108	577	Nuclear	6	no	no
sr11620	chr01	725887	728136	1	no	0.114	749	Cytoplasmic	3.2	no	no
sr11621	chr01	728244	732245	-1	no	0.104	1333	Cytoplasmic	7.2	no	no
sr11622	chr01	734999	737650	1	no	0.19	883	Nuclear	4.8	no	no
sr11623	chr01	738592	740187	1	yes	0.74	531	Membrane bound Golgi	7.9	yes	yes
sr11624	chr01	741092	743074	1	no	0.104	660	Plasma membrane	7.3	no	no
sr11625	chr01	743342	744040	-1	no	0.141	232	Membrane bound Mitochondrial	6.3	no	no
sr11626	chr01	744878	746317	-1	no	0.108	479	Cytoplasmic	9	no	no
sr11627	chr01	748210	751935	-1	no	0.135	1241	Membrane bound Vacuolar	3.5	no	no
sr11628	chr01	756307	759351	1	no	0.142	1014	Nuclear	4.7	no	no
sr11629	chr01	760100	761062	1	no	0.14	320	Plasma membrane	4.5	no	no
sr11630	chr01	761588	763504	-1	no	0.138	638	Nuclear	6	no	no
sr11631	chr01	764052	767342	-1	no	0.247	1096	Cytoplasmic	5	no	no
sr11632	chr01	767869	769230	1	no	0.403	453	Plasma membrane	8.9	no	no
sr11633	chr01	769475	773106	-1	no	0.11	1178	Nuclear	6.5	no	no
sr11634	chr01	775743	781610	1	no	0.131	1955	Cytoplasmic	7.5	no	no
sr11635	chr01	782065	783249	1	no	0.178	394	Membrane bound Mitochondrial	5.7	no	no
sr11636	chr01	783301	784014	-1	no	0.287	210	Vacuolar	2.1	no	no
sr11637	chr01	784447	786916	1	no	0.105	742	Cytoplasmic	9.5	no	no
sr11638	chr01	790135	792357	1	no	0.114	740	Nuclear	5.7	no	no
sr11639	chr01	793411	796246	-1	no	0.128	847	Membrane bound Mitochondrial	7.9	no	no
sr11640	chr01	796652	798091	-1	no	0.174	479	Membrane bound Mitochondrial	9.7	no	no
sr11641	chr01	798403	800766	-1	no	0.143	787	Cytoplasmic	4.1	no	no
sr11642	chr01	801434	805039	-1	no	0.115	1201	Cytoplasmic	4.6	no	no
sr11643	chr01	806062	807750	1	no	0.115	562	Nuclear	6.5	no	no
sr11644	chr01	807891	809654	-1	no	0.128	587	Nuclear	5	no	no
sr11645	chr01	809990	811258	1	no	0.105	422	Nuclear	9.9	no	no
sr11646	chr01	811450	813414	-1	yes	0.846	654	Membrane bound Extracellular (Secreted)	5.1	yes	yes
sr11647	chr01	814522	815097	-1	no	0.146	191	Plasma membrane	9.7	no	no
sr11648	chr01	819044	820924	1	no	0.111	626	Nuclear	4.2	no	no
sr11649	chr01	821479	822771	1	no	0.111	430	Membrane bound Mitochondrial	4.1	no	no
sr11650	chr01	822908	825496	-1	no	0.171	862	Nuclear	3.3	no	no
sr11651	chr01	826055	828622	-1	yes	0.604	855	Membrane bound Mitochondrial	6.5	yes	yes
sr11652	chr01	829493	832846	1	no	0.105	1117	Nuclear	6.2	no	no
sr11653	chr01	832904	834715	-1	no	0.106	603	Cytoplasmic	4	no	no
sr11654	chr01	835506	836405	-1	no	0.239	299	Membrane bound Endoplasmic reticulum	7.3	no	no
sr11655	chr01	839375	841669	1	no	0.121	764	Cytoplasmic	3.4	no	no
sr11656	chr01	842404	843936	-1	no	0.136	510	Cytoplasmic	5.7	no	no
sr11657	chr01	845078	847219	1	no	0.106	713	Nuclear	5.3	no	no
sr11658	chr01	848377	848862	1	no	0.106	161	Plasma membrane	2.8	no	no
sr11659	chr01	851682	852191	1	no	0.102	169	Membrane bound Mitochondrial	9.4	no	no
sr11660	chr01	853638	855281	-1	no	0.155	547	Nuclear	6.4	no	no
sr11661	chr01	856764	858038	1	yes	0.884	424	Extracellular (Secreted)	8.7	yes	yes
sr11662	chr01	858293	860050	-1	no	0.332	585	Membrane bound Mitochondrial	7.6	no	no
sr11663	chr01	861561	863468	1	no	0.121	635	Membrane bound Mitochondrial	6.5	no	no
sr11664	chr01	863739	865991	-1	no	0.096	750	Nuclear	4.6	no	no
sr11665	chr01	867079	870503	-1	no	0.094	536	Cytoplasmic	6.1	no	no
sr11666	chr01	871668	873005	1	no	0.152	445	Membrane bound Mitochondrial	9.9	no	no
sr11667	chr01	873388	876867	-1	no	0.143	1159	Nuclear	3.4	no	no
sr11668	chr01	882233	883483	-1	no	0.137	416	Cytoplasmic	3.4	no	no
sr11669	chr01	885084	886004	-1	no	0.099	306	Nuclear	9.5	no	no
sr11670	chr01	886497	887579	1	no	0.102	360	Cytoplasmic	3.9	no	no
sr11671	chr01	887898	889595	-1	no	0.102	255	Cytoplasmic	4.8	no	no
sr11672	chr01	890685	892592	1	no	0.101	635	Nuclear	10	no	no
sr11673	chr01	892855	895032	-1	no	0.108	725	Plasma membrane	7.1	no	no
sr11674	chr01	895768	904611	1	no	0.105	2947	Membrane bound Mitochondrial	5.7	no	no
sr11675	chr01	904865	905818	-1	no	0.172	317	Mitochondrial	8.7	no	no
sr11676	chr01	905930	907534	-1	no	0.102	534	Nuclear	4.2	no	no
sr11677	chr01	908507	909415	1	yes	0.692	302	Extracellular (Secreted)	6.9	yes	yes
sr11678	chr01	909775	910797	1	yes	0.907	340	Membrane bound Mitochondrial	5.1	yes	yes
sr11679	chr01	911291	914185	-1	no	0.242	964	Membrane bound Mitochondrial	4.6	no	no
sr11680	chr01	914611	918018	1	no	0.122	1135	Cytoplasmic	7.3	no	no
sr11681	chr01	918203	919261	-1	yes	0.868	352	Plasma membrane	4.5	yes	yes
sr11682	chr01	919965	920748	1	no	0.109	212	Cytoplasmic	3.4	no	no
sr11683	chr01	921063	922670	1	no	0.13	535	Nuclear	6.6	no	no
sr11684	chr01	922744	926658	-1	no	0.127	1304	Membrane bound Endoplasmic reticulum	8.9	no	no
sr11685	chr01	926952	930173	1	no	0.103	1073	Plasma membrane	2	no	no
sr11686	chr01	930298	931483	-1	no	0.101	370	Nuclear	2.9	no	no
sr11687	chr01	932337	934541	1	no	0.267	734	Cytoplasmic	9.5	no	no
sr11688	chr01	934820	935344	-1	no	0.12	174	Nuclear	6.9	no	no
sr11689	chr01	937807	943422	-1	no	0.116	1871	Membrane bound Vacuolar	3.4	no	no
sr11690	chr01	945305	945904	1	no	0.119	172	Nuclear	6.5	no	no
sr11691	chr01	946004	947197	-1	no	0.121	397	Membrane bound Mitochondrial	3.7	no	no
sr11692	chr01	947526	949400	1	yes	0.687	624	Membrane bound Endoplasmic reticulum	8.2	yes	no
sr11693	chr01	949567	950699	1	no	0.105	349	Nuclear	9.9	no	no
sr11694	chr01	950771	951407	-1	no	0.106	181	Golgi	7.9	no	no
sr11695	chr01	951809	955345	1	no	0.125	1178	Plasma membrane	3.4	no	no
sr11696	chr01	955635	956879	1	no	0.128	314	Nuclear	4	no	no
sr11697	chr01	957680	959371	-1	no	0.107	563	Plasma membrane	9.7	no	no
sr11698	chr01	962746	964686	-1	yes	0.771	646	Mitochondrial	5.9	yes	yes
sr11699	chr01	965262	966284	1	no	0.1	314	Mitochondrial	8	no	no
sr11700	chr01	966372	967223	-1	no	0.108	283	Membrane bound Mitochondrial	2.8	no	no
sr11701	chr01	967537	971166	1	no	0.153	1209	Nuclear	5.2	no	no
sr11702	chr01	971335	975678	-1	no	0.101	1447	Plasma membrane	4.6	no	no
sr11703	chr01	977178	977931	1	no	0.12	220	Nuclear	8.2	no	no
sr11704	chr01	978173	980210	-1	no	0.128	558	Membrane bound Mitochondrial	4.7	no	no
sr11705	chr01	982471	983688	1	no	0.106	405	Cytoplasmic	3.1	no	no
sr11706	chr01	983767	985584	-1	no	0.303	574	Membrane bound Endoplasmic reticulum	9.7	no	no
sr11707	chr01	986206	988757	1	no	0.14	802	Membrane bound Mitochondrial	5.4	no	no
sr11708	chr01	988804	990066	-1	no	0.117	420	Cytoplasmic	3.5	no	no
sr11709	chr01	990397	993162	-1	no	0.107	921	Cytoplasmic	4.6	no	no
sr11710	chr01	993702	996626	1	no	0.14	974	Mitochondrial	6.5	no	no
sr11711	chr01	996739	1000569	-1	no	0.105	1276	Plasma membrane	4.3	no	no
sr11712	chr01	1002550	1003692	1	no	0.185	380	Membrane bound Endoplasmic reticulum	6.4	no	no
sr11713	chr01	1004904	1009148	1	no	0.13	1414	Cytoplasmic	6.3	no	no
sr11714	chr01	1009499	1010734	-1	no	0.281	252	Plasma membrane	7.4	no	no
sr11715	chr01	1013508	1016162	1	no	0.104	884	Plasma membrane	3.8	no	no
sr11716	chr01	1016266	1017660	-1	no	0.114	464	Membrane bound Peroxisomal	9.8	no	no
sr11717	chr01	1017978	1021694	1	no	0.111	1134	Plasma membrane	3	no	no
sr11718	chr01	1021819	1023612	-1	no	0.107	597	Nuclear	9.3	no	no
sr11719	chr01	1024438	1024941	1	no	0.234	167	Cytoplasmic	5.7	no	no
sr11720	chr01	1025758	1028721	1	no	0.107	987	Cytoplasmic	6.7	no	no
sr11721	chr01	1029553	1032141	1	no	0.121	862	Membrane bound Extracellular (Secreted)	9.9	no	no
sr11722	chr01	1032273	1033553	-1	no	0.155	426	Membrane bound Mitochondrial	9.9	no	no
sr11723	chr01	1034160	1035203	1	no	0.121	347	Cytoplasmic	5.1	no	no
sr11758	chr01	1035541	1038348	-1	no	0.102	935	Nuclear	6.9	no	no
sr11757	chr01	1039275	1040499	-1	no	0.108	287	Cytoplasmic	7.1	no	no
sr11756	chr01	1043076	1043513	1	no	0.099	145	Nuclear	4.3	no	no
sr11755	chr01	1043629	1045089	-1	no	0.107	401	Nuclear	6	no	no
sr11754	chr01	1046202	1047389	1	yes	0.611	395	Membrane bound Extracellular (Secreted)	4.8	yes	yes
sr11753	chr01	1048369	1050198	1	no	0.109	609	Nuclear	5.4	no	no
sr11752	chr01	1050423	1054289	-1	no	0.102	1288	Cytoplasmic	8.2	no	no
sr11751	chr01	1054648	1055200	1	no	0.112	130	Membrane bound Endoplasmic reticulum	3.3	no	no
sr11750	chr01	1055356	1056479	-1	no	0.148	319	Membrane bound Mitochondrial	4.8	no	no
sr11749	chr01	1056982	1057947	1	no	0.105	321	Nuclear	7.5	no	no
sr11748	chr01	1058295	1060616	-1	no	0.103	773	Cytoplasmic	5.8	no	no
sr11747	chr01	1062056	1063690	-1	no	0.115	544	Nuclear	4	no	no
sr11746	chr01	1066426	1067449	1	no	0.158	181	Golgi	10	no	no
sr11745	chr01	1069045	1070798	1	no	0.113	560	Cytoplasmic	3.5	no	no
sr11744	chr01	1071025	1073934	-1	no	0.13	969	Nuclear	6.3	no	no
sr11743	chr01	1078235	1080061	1	no	0.141	608	Nuclear	4.3	no	no
sr11742	chr01	1085418	1086305	1	no	0.112	295	Nuclear	5.7	no	no
sr11741	chr01	1086625	1087677	1	no	0.1	350	Cytoplasmic	8.5	no	no
sr11740	chr01	1087711	1089570	-1	no	0.103	619	Membrane bound Endoplasmic reticulum	6.5	no	no
sr11739	chr01	1090632	1091932	-1	no	0.149	392	Membrane bound Mitochondrial	9.5	no	no
sr11738	chr01	1092339	1093664	-1	no	0.122	441	Nuclear	6.1	no	no
sr11737	chr01	1094350	1095990	1	no	0.125	546	Cytoplasmic	10	no	no
sr11736	chr01	1097024	1098941	1	no	0.109	611	Plasma membrane	8.7	no	no
sr11735	chr01	1099190	1100965	-1	no	0.119	590	Plasma membrane	5.4	no	no
sr11734	chr01	1101541	1104755	-1	no	0.104	955	Nuclear	4.9	no	no
sr11733	chr01	1106752	1109994	1	no	0.177	1080	Nuclear	4.4	no	no
sr11732	chr01	1111610	1115347	1	no	0.121	1245	Plasma membrane	6.4	no	no
sr11731	chr01	1115715	1117280	-1	no	0.1	520	Plasma membrane	8.1	no	no
sr11730	chr01	1119057	1119476	-1	no	0.106	79	Cytoplasmic	8.7	no	no
sr11729	chr01	1120058	1123789	1	no	0.195	1243	Plasma membrane	9.8	no	no
sr11728	chr01	1124527	1125493	-1	no	0.101	292	Membrane bound Golgi	7.4	no	no
sr11727	chr01	1127073	1127594	1	no	0.101	173	Membrane bound Peroxisomal	6.4	no	no
sr11726	chr01	1127689	1133049	-1	no	0.156	1786	Nuclear	3.7	no	no
sr11782	chr01	1133509	1137174	1	no	0.171	1221	Membrane bound Mitochondrial	6.5	no	no
sr11781	chr01	1137481	1139391	1	no	0.122	636	Membrane bound Mitochondrial	6.5	no	no
sr11780	chr01	1139604	1144571	-1	no	0.15	1655	Cytoplasmic	6.7	no	no
sr11779	chr01	1145295	1148795	-1	no	0.125	1166	Nuclear	6.3	no	no
sr11778	chr01	1152712	1154025	1	no	0.114	306	Cytoplasmic	9.3	no	no
sr11777	chr01	1155126	1159370	1	no	0.103	1414	Nuclear	6.1	no	no
sr11776	chr01	1159513	1160949	-1	no	0.109	478	Membrane bound Mitochondrial	5.1	no	no
sr11775	chr01	1162902	1164354	1	no	0.427	426	Extracellular (Secreted)	3.8	yes	no
sr11774	chr01	1164459	1165445	-1	no	0.295	328	Cytoplasmic	7	no	no
sr11773	chr01	1167478	1170945	1	no	0.127	1155	Cytoplasmic	6.2	no	no
sr11772	chr01	1171066	1171539	-1	no	0.259	157	Nuclear	3.6	no	no
sr11771	chr01	1172040	1172631	-1	no	0.207	160	Mitochondrial	10	no	no
sr11770	chr01	1173032	1174111	1	no	0.174	359	Membrane bound Mitochondrial	8.6	no	no
sr11769	chr01	1174266	1174895	-1	no	0.245	154	Membrane bound Mitochondrial	8.6	no	no
sr11768	chr01	1175696	1178506	-1	no	0.118	936	Nuclear	6.3	no	no
sr11767	chr01	1181732	1183476	-1	no	0.103	280	Membrane bound Mitochondrial	3.5	no	no
sr11766	chr01	1184622	1185644	1	no	0.181	340	Membrane bound Mitochondrial	8.5	no	no
sr11765	chr01	1185977	1188751	-1	no	0.101	924	Cytoplasmic	4.3	no	no
sr11764	chr01	1189574	1193845	-1	no	0.206	1423	Nuclear	5.1	no	no
sr11783	chr01	1197043	1197840	1	no	0.109	265	Membrane bound Peroxisomal	8.9	no	no
sr11784	chr01	1198538	1199692	1	no	0.106	384	Membrane bound Mitochondrial	5.1	no	no
sr11785	chr01	1202033	1204861	-1	no	0.1	942	Nuclear	6.9	no	no
sr11786	chr01	1207036	1208376	1	no	0.119	446	Cytoplasmic	10	no	no
sr11787	chr01	1208463	1209555	-1	no	0.123	339	Membrane bound Mitochondrial	8	no	no
sr11788	chr01	1209895	1211025	1	no	0.262	376	Cytoplasmic	3.7	no	no
sr11789	chr01	1211227	1213023	-1	no	0.099	598	Cytoplasmic	3.1	no	no
sr11790	chr01	1213771	1214766	-1	no	0.129	331	Membrane bound Golgi	6.6	no	no
sr11791	chr01	1214899	1215714	-1	no	0.106	271	Nuclear	5.4	no	no
sr11792	chr01	1216298	1217626	1	no	0.131	113	Cytoplasmic	9.3	no	no
sr11793	chr01	1217955	1221533	-1	no	0.107	1192	Nuclear	6.7	no	no
sr11794	chr01	1223264	1224214	1	no	0.111	294	Mitochondrial	6.3	no	no
sr11795	chr01	1224333	1226171	-1	no	0.117	612	Cytoplasmic	10	no	no
sr11796	chr01	1226886	1228247	-1	no	0.193	453	Membrane bound Mitochondrial	9.7	no	no
sr11797	chr01	1228985	1229950	1	no	0.138	321	Nuclear	5.5	no	no
sr11798	chr01	1230876	1231937	1	no	0.115	353	Cytoplasmic	3.2	no	no
sr11799	chr01	1232058	1234283	-1	no	0.105	691	Cytoplasmic	4.9	no	no
sr11800	chr01	1235984	1241617	1	no	0.104	1877	Membrane bound Vacuolar	8	no	no
sr11801	chr01	1241804	1243132	-1	no	0.31	442	Nuclear	4.1	no	no
sr11802	chr01	1244228	1245260	1	no	0.105	142	Cytoplasmic	6	no	no
sr10102.2	chr01	1246786	1250763	1	no	0.11	1325	Membrane bound Vacuolar	6	no	no
sr10104	chr01	1251197	1254549	-1	no	0.125	1076	Nuclear	4.2	no	no
sr10105	chr01	1255622	1256041	-1	no	0.3	139	Mitochondrial	8.9	no	no
sr10106	chr01	1256354	1257154	1	no	0.108	266	Nuclear	6.5	no	no
sr10108	chr01	1257314	1258285	-1	no	0.131	323	Membrane bound Mitochondrial	6.4	no	no
sr10109	chr01	1259041	1260270	-1	no	0.119	382	Extracellular (Secreted)	4	yes	no
sr10112.2	chr01	1262833	1265736	1	no	0.304	967	Nuclear	4.8	no	no
sr10113.2	chr01	1266070	1268016	1	no	0.103	648	Nuclear	5.2	no	no
sr10114	chr01	1268123	1269742	-1	no	0.116	539	Membrane bound Mitochondrial	7	no	no
sr20004	chr01	1271488	1271688	1	yes	0.89	66	Extracellular (Secreted)	6	yes	yes
sr10115	chr01	1273123	1273812	-1	yes	0.858	229	Extracellular (Secreted)	9.7	yes	yes
sr10116	chr01	1277492	1279951	1	yes	0.687	819	Membrane bound Extracellular (Secreted)	7.6	yes	yes
sr10118.2	chr01	1280582	1282216	1	no	0.107	544	Nuclear	5.1	no	no
sr10119	chr01	1282362	1286249	-1	no	0.116	1295	Cytoplasmic	4	no	no
sr10122	chr01	1287118	1292337	-1	no	0.224	1739	Nuclear	4.7	no	no
sr10123	chr01	1293948	1294691	-1	no	0.109	247	Cytoplasmic	6.8	no	no
sr10125.2	chr01	1295008	1295928	1	no	0.142	306	Mitochondrial	8.4	no	no
sr10126	chr01	1296003	1298921	-1	no	0.118	972	Nuclear	5.2	no	no
sr10127	chr01	1299295	1303521	-1	no	0.103	1408	Cytoplasmic	4.2	no	no
sr10128	chr01	1304466	1307834	-1	no	0.11	1122	Membrane bound Endoplasmic reticulum	9.9	no	no
sr10130	chr01	1308253	1309314	-1	no	0.109	353	Membrane bound Mitochondrial	9.6	no	no
sr10131	chr01	1310216	1313395	1	no	0.115	1059	Plasma membrane	4.4	no	no
sr10132	chr01	1313761	1314799	-1	no	0.115	307	Membrane bound Extracellular (Secreted)	2.6	no	no
sr10134	chr01	1315403	1320112	1	no	0.108	1569	Cytoplasmic	6.2	no	no
sr10135	chr01	1320205	1323327	-1	no	0.111	1040	Cytoplasmic	3.7	no	no
sr10136	chr01	1323875	1325014	1	no	0.112	379	Membrane bound Mitochondrial	4.7	no	no
sr10137	chr01	1325860	1328910	1	no	0.11	1016	Cytoplasmic	4.4	no	no
sr10139	chr01	1329794	1332616	1	no	0.1	940	Plasma membrane	10	no	no
sr10141	chr01	1333135	1335387	1	no	0.113	750	Nuclear	6.2	no	no
sr10142	chr01	1335652	1338459	-1	no	0.185	935	Nuclear	4.4	no	no
sr10144	chr01	1340262	1342460	1	no	0.103	732	Plasma membrane	7.4	no	no
sr10147.2	chr01	1344894	1347569	-1	no	0.106	891	Nuclear	4.6	no	no
sr10148	chr01	1351049	1355377	-1	no	0.106	1442	Cytoplasmic	4	no	no
sr10150	chr01	1356355	1357331	1	no	0.102	135	Nuclear	10	no	no
sr10151.2	chr01	1357602	1358468	-1	no	0.126	210	Cytoplasmic	9.8	no	no
sr10152	chr01	1358850	1360363	1	no	0.099	470	Plasma membrane	3.9	no	no
sr10153.2	chr01	1360549	1365025	-1	no	0.125	959	Membrane bound Golgi	6.2	no	no
sr10156.2	chr01	1367113	1369686	1	no	0.109	857	Nuclear	5.3	no	no
sr10158	chr01	1369987	1372920	-1	no	0.103	977	Plasma membrane	9.8	no	no
sr10159	chr01	1373813	1379143	-1	no	0.129	1776	Plasma membrane	3.6	no	no
sr10160.2	chr01	1379547	1380524	1	no	0.114	325	Membrane bound Mitochondrial	8.2	no	no
sr10161	chr01	1380651	1382324	-1	no	0.103	557	Plasma membrane	8.6	no	no
sr10163.2	chr01	1383185	1384672	1	no	0.155	495	Nuclear	4.3	no	no
sr10164	chr01	1384914	1389128	-1	no	0.104	1404	Nuclear	4.4	no	no
sr10165.2	chr01	1391641	1394583	1	yes	0.839	980	Plasma membrane	5.5	yes	yes
sr10166	chr01	1394745	1395339	-1	no	0.217	176	Plasma membrane	5.4	no	no
sr10168	chr01	1395854	1397443	1	no	0.103	529	Nuclear	7	no	no
sr10169	chr01	1397544	1399103	-1	no	0.117	519	Nuclear	7	no	no
sr10172	chr01	1400264	1402071	1	no	0.111	577	Cytoplasmic	9.4	no	no
sr10173	chr01	1402491	1403522	1	no	0.111	343	Membrane bound Mitochondrial	2.7	no	no
sr10174	chr01	1403712	1405370	-1	no	0.131	552	Cytoplasmic	9.5	no	no
sr10176.2	chr01	1407476	1415929	1	no	0.101	2817	Cytoplasmic	4.4	no	no
sr10177.2	chr01	1416323	1418470	-1	no	0.111	715	Nuclear	7.5	no	no
sr10178	chr01	1423995	1424330	1	yes	0.49	111	Mitochondrial	4.6	yes	yes
sr10179	chr01	1424917	1427182	1	no	0.129	682	Cytoplasmic	10	no	no
sr10180	chr01	1427770	1428614	-1	no	0.224	171	Extracellular (Secreted)	2.9	yes	no
sr10181	chr01	1430923	1433250	1	no	0.103	775	Cytoplasmic	3.6	no	no
sr10182	chr01	1434533	1436011	1	yes	0.659	492	Plasma membrane	3	yes	yes
sr10183	chr01	1436238	1437761	-1	no	0.1	507	Extracellular (Secreted)	2.5	yes	no
sr10185	chr01	1439325	1443776	1	no	0.127	1483	Cytoplasmic	4	no	no
sr10186	chr01	1444070	1448521	-1	no	0.108	1483	Membrane bound Extracellular (Secreted)	6	no	no
sr10187	chr01	1449111	1449901	1	no	0.158	176	Membrane bound Endoplasmic reticulum	5.6	no	no
sr10188	chr01	1450085	1450490	-1	no	0.105	97	Cytoplasmic	6.7	no	no
sr10190	chr01	1452287	1454524	-1	no	0.107	715	Nuclear	5	no	no
sr10193	chr01	1456569	1458560	-1	no	0.103	611	Cytoplasmic	4.8	no	no
sr10194	chr01	1459991	1461175	-1	no	0.11	394	Cytoplasmic	3.1	no	no
sr10195	chr01	1462128	1462865	1	no	0.103	245	Nuclear	4.9	no	no
sr10196	chr01	1462958	1463953	-1	no	0.1	331	Cytoplasmic	7.4	no	no
sr10197	chr01	1467948	1469549	-1	no	0.128	533	Plasma membrane	2.3	no	no
sr10229	chr01	1470577	1471554	1	no	0.115	325	Nuclear	3.9	no	no
sr10227	chr01	1471682	1476304	-1	no	0.119	1540	Membrane bound Vacuolar	8.5	no	no
sr10226	chr01	1476719	1477503	1	no	0.16	185	Mitochondrial	9.9	no	no
sr10225.2	chr01	1477799	1478688	-1	no	0.118	204	Cytoplasmic	6.1	no	no
sr10223	chr01	1479314	1480513	1	no	0.14	399	Mitochondrial	8	no	no
sr10221	chr01	1480939	1482792	1	no	0.461	617	Membrane bound Golgi	9.6	no	no
sr10220	chr01	1483543	1484428	1	no	0.17	170	Membrane bound Vacuolar	9.6	no	no
sr10219	chr01	1484849	1485747	-1	no	0.105	244	Nuclear	6.1	no	no
sr10218	chr01	1486126	1486953	1	no	0.102	275	Plasma membrane	5.6	no	no
sr10216	chr01	1487140	1490409	-1	no	0.148	1089	Cytoplasmic	5.4	no	no
sr10215	chr01	1490782	1492479	-1	no	0.115	565	Plasma membrane	5	no	no
sr10213	chr01	1493473	1494552	1	no	0.116	359	Cytoplasmic	2.7	no	no
sr10212	chr01	1494649	1497768	-1	no	0.112	1039	Nuclear	6.9	no	no
sr10211	chr01	1498594	1502496	1	no	0.122	1300	Cytoplasmic	10	no	no
sr10209	chr01	1502559	1504013	-1	no	0.235	484	Membrane bound Mitochondrial	7.8	no	no
sr10208.2	chr01	1504826	1506031	-1	no	0.132	274	Mitochondrial	9.9	no	no
sr10207.2	chr01	1506569	1507523	-1	no	0.097	190	Plasma membrane	7.6	no	no
sr10206	chr01	1508792	1510417	1	no	0.101	541	Nuclear	6.9	no	no
sr10203	chr01	1514682	1516283	1	no	0.122	533	Cytoplasmic	3.4	no	no
sr10201.2	chr01	1516766	1518666	-1	no	0.13	577	Cytoplasmic	4	no	no
sr10200	chr01	1519706	1521362	1	no	0.107	527	Nuclear	5.2	no	no
sr10199.2	chr01	1521536	1522568	-1	no	0.1	227	Cytoplasmic	9.4	no	no
sr11803	chr01	1523824	1525179	1	no	0.137	451	Cytoplasmic	10	no	no
sr11804	chr01	1525363	1525878	-1	no	0.102	171	Nuclear	5.5	no	no
sr11805	chr01	1528101	1532312	1	no	0.106	1403	Nuclear	5.3	no	no
sr11806	chr01	1532787	1534118	-1	no	0.242	443	Membrane bound Mitochondrial	7.2	no	no
sr11807	chr01	1537411	1539537	1	no	0.144	708	Nuclear	3.1	no	no
sr11808	chr01	1539705	1541324	-1	no	0.101	539	Nuclear	6.4	no	no
sr11809	chr01	1542376	1546185	1	no	0.103	1269	Cytoplasmic	2.3	no	no
sr11810	chr01	1547270	1549420	1	yes	0.914	716	Plasma membrane	7.2	yes	yes
sr11811	chr01	1549590	1552160	-1	no	0.177	856	Nuclear	3	no	no
sr11812	chr01	1552680	1553369	1	no	0.11	229	Cytoplasmic	6.2	no	no
sr11813	chr01	1553447	1554262	-1	no	0.139	271	Membrane bound Mitochondrial	9.3	no	no
sr11814	chr01	1555775	1556061	1	no	0.1	61	Cytoplasmic	6.4	no	no
sr11815	chr01	1556248	1557558	-1	yes	0.556	436	Plasma membrane	4	yes	yes
sr11816	chr01	1558176	1560050	1	no	0.105	624	Membrane bound Mitochondrial	9.2	no	no
sr11817	chr01	1560739	1561914	1	yes	0.805	391	Nuclear	4.7	yes	yes
sr11818	chr01	1562122	1567548	-1	no	0.159	1808	Nuclear	5.4	no	no
sr11819	chr01	1568712	1570826	1	no	0.102	704	Membrane bound Endoplasmic reticulum	7.7	no	no
sr11820	chr01	1571265	1571904	-1	no	0.116	184	Membrane bound Mitochondrial	7.6	no	no
sr11821	chr01	1572308	1574422	1	no	0.187	704	Membrane bound Mitochondrial	4.8	no	no
sr11822	chr01	1574569	1578675	-1	no	0.1	1368	Nuclear	6.1	no	no
sr11823	chr01	1581600	1582739	1	no	0.099	379	Nuclear	6	no	no
sr11824	chr01	1583066	1583607	-1	no	0.126	152	Cytoplasmic	4	no	no
sr11825	chr01	1584222	1585469	1	no	0.105	415	Cytoplasmic	6.8	no	no
sr11826	chr01	1586692	1587615	1	no	0.229	307	Cytoplasmic	5.5	no	no
sr11827	chr01	1587734	1589647	-1	no	0.101	637	Membrane bound Golgi	10	no	no
sr11828	chr01	1590673	1593897	1	no	0.102	1074	Plasma membrane	4.8	no	no
sr11829	chr01	1599465	1602194	1	no	0.126	909	Nuclear	6.3	no	no
sr11830	chr01	1602574	1603488	-1	no	0.115	304	Nuclear	5.8	no	no
sr11831	chr01	1604649	1609760	1	no	0.103	1703	Cytoplasmic	3.4	no	no
sr11832	chr01	1610417	1613461	-1	no	0.101	1014	Cytoplasmic	4	no	no
sr11833	chr01	1615139	1616878	1	no	0.121	552	Cytoplasmic	5.5	no	no
sr11834	chr01	1617127	1618212	-1	no	0.115	361	Cytoplasmic	8.5	no	no
sr11835	chr01	1619796	1621792	-1	no	0.108	634	Cytoplasmic	5.7	no	no
sr11836	chr01	1622345	1622765	1	no	0.103	71	Mitochondrial	9	no	no
sr11837	chr01	1623412	1626861	1	no	0.114	1149	Nuclear	3.5	no	no
sr11838	chr01	1629152	1630643	1	no	0.106	403	Cytoplasmic	5.7	no	no
sr11839	chr01	1631294	1632588	-1	no	0.108	403	Cytoplasmic	8	no	no
sr11840	chr01	1633033	1634298	-1	no	0.126	421	Nuclear	4.7	no	no
sr11841	chr01	1637349	1637867	1	no	0.145	172	Mitochondrial	7.9	no	no
sr11865	chr01	1640442	1641884	1	no	0.179	480	Nuclear	6	no	no
sr11864	chr01	1642161	1644215	-1	no	0.105	684	Nuclear	7.1	no	no
sr11863	chr01	1644850	1646907	1	no	0.114	685	Membrane bound Mitochondrial	6.2	no	no
sr11862	chr01	1649106	1650353	1	no	0.101	375	Cytoplasmic	9.6	no	no
sr11861	chr01	1651916	1653520	-1	no	0.103	534	Nuclear	9.9	no	no
sr11860	chr01	1654005	1657142	-1	no	0.107	1045	Membrane bound Mitochondrial	6.4	no	no
sr11859	chr01	1658347	1660266	1	no	0.465	639	Plasma membrane	6.2	no	no
sr11858	chr01	1660414	1661193	-1	no	0.112	259	Plasma membrane	4	no	no
sr11857	chr01	1661942	1664635	1	no	0.124	897	Nuclear	6	no	no
sr11856	chr01	1664849	1667008	-1	no	0.213	627	Nuclear	6.6	no	no
sr11855	chr01	1667242	1668708	1	no	0.114	462	Nuclear	10	no	no
sr11854	chr01	1672096	1672806	1	no	0.259	236	Nuclear	6.4	no	no
sr11853	chr01	1672957	1675605	-1	no	0.112	882	Nuclear	6	no	no
sr11852	chr01	1675957	1681056	1	no	0.102	1699	Cytoplasmic	3.4	no	no
sr11851	chr01	1682096	1682927	1	no	0.1	245	Nuclear	6.5	no	no
sr11850	chr01	1683329	1685854	1	no	0.111	841	Nuclear	5	no	no
sr11849	chr01	1687484	1692463	1	no	0.099	1659	Nuclear	6	no	no
sr11848	chr01	1692644	1693600	-1	no	0.157	318	Cytoplasmic	8	no	no
sr11847	chr01	1694953	1697331	-1	no	0.106	792	Nuclear	5.7	no	no
sr11846	chr01	1700245	1702566	1	no	0.175	773	Nuclear	4	no	no
sr11845	chr01	1702882	1703691	-1	yes	0.769	269	Membrane bound Extracellular (Secreted)	8.8	yes	no
sr11844	chr01	1706179	1714719	1	no	0.112	2846	Cytoplasmic	4.9	no	no
sr11843	chr01	1715277	1716959	1	no	0.169	560	Cytoplasmic	10	no	no
sr11842	chr01	1717136	1718155	-1	no	0.139	339	Mitochondrial	8.5	no	no
sr11866	chr01	1720662	1724462	1	no	0.103	1266	Cytoplasmic	3.5	no	no
sr11867	chr01	1725141	1725938	1	no	0.102	265	Cytoplasmic	5	no	no
sr11868	chr01	1726092	1728338	-1	no	0.103	748	Nuclear	6.8	no	no
sr11869	chr01	1729293	1730896	-1	no	0.125	207	Mitochondrial	8.3	no	no
sr11870	chr01	1731950	1734568	-1	no	0.109	872	Nuclear	5.6	no	no
sr11871	chr01	1736408	1737259	-1	no	0.101	254	Endoplasmic reticulum	6.5	no	no
sr11872	chr01	1738401	1739873	-1	no	0.123	490	Membrane bound Mitochondrial	9.8	no	no
sr11873	chr01	1741173	1742471	-1	no	0.155	432	Membrane bound Mitochondrial	9.7	no	no
sr11874	chr01	1743156	1745867	1	no	0.147	903	Mitochondrial	9.2	no	no
sr11875	chr01	1745955	1748033	-1	no	0.106	692	Membrane bound Mitochondrial	9.9	no	no
sr11876	chr01	1749990	1751315	1	yes	0.863	441	Extracellular (Secreted)	8.4	yes	yes
sr11877	chr01	1751653	1753491	1	no	0.114	612	Cytoplasmic	4.2	no	no
sr11878	chr01	1753610	1754965	-1	no	0.101	372	Golgi	9	no	no
sr11879	chr01	1755332	1756651	1	no	0.114	439	Nuclear	5.6	no	no
sr11880	chr01	1756851	1759100	-1	no	0.119	749	Membrane bound Mitochondrial	7.5	no	no
sr11881	chr01	1761150	1762826	1	no	0.108	558	Cytoplasmic	4.2	no	no
sr11882	chr01	1762932	1763621	-1	no	0.115	229	Membrane bound Mitochondrial	6.8	no	no
sr11883	chr01	1763902	1766058	1	no	0.144	594	Membrane bound Endoplasmic reticulum	9.9	no	no
sr11884	chr01	1767288	1770521	1	no	0.122	1077	Nuclear	6.2	no	no
sr11885	chr01	1770639	1774361	-1	no	0.115	1240	Cytoplasmic	2.8	no	no
sr11886	chr01	1774936	1775826	1	no	0.103	296	Nuclear	5.5	no	no
sr11887	chr01	1776462	1777298	1	no	0.127	278	Mitochondrial	6.1	no	no
sr11888	chr01	1777387	1779843	-1	no	0.441	818	Membrane bound Mitochondrial	6.9	no	no
sr11889	chr01	1780295	1781125	-1	no	0.135	276	Nuclear	5.9	no	no
sr11890	chr01	1781478	1785197	1	no	0.105	1239	Cytoplasmic	3.1	no	no
sr11891	chr01	1785295	1791162	-1	no	0.103	1955	Nuclear	3.4	no	no
sr11892	chr01	1791753	1795347	1	no	0.109	1064	Nuclear	5.8	no	no
sr11893	chr01	1796091	1797266	1	no	0.105	391	Membrane bound Mitochondrial	3.7	no	no
sr11894	chr01	1797655	1798266	-1	no	0.1	203	Nuclear	10	no	no
sr11895	chr01	1798730	1799890	-1	no	0.187	386	Plasma membrane	4.2	no	no
sr11896	chr01	1800591	1801805	1	no	0.127	404	Membrane bound Mitochondrial	9.9	no	no
sr11897	chr01	1801892	1804105	-1	no	0.136	737	Nuclear	2.7	no	no
sr11898	chr01	1804674	1805936	1	no	0.105	357	Nuclear	4.2	no	no
sr11899	chr01	1806165	1806883	-1	no	0.104	177	Nuclear	3.9	no	no
sr11900	chr01	1807429	1809372	-1	no	0.114	613	Cytoplasmic	8.1	no	no
sr11901	chr01	1810154	1811587	1	no	0.101	477	Membrane bound Mitochondrial	3.4	no	no
sr11902	chr01	1811757	1813106	-1	no	0.168	449	Nuclear	4.8	no	no
sr11903	chr01	1813651	1814487	-1	no	0.12	278	Plasma membrane	6.9	no	no
sr11904	chr01	1815474	1818428	1	no	0.107	984	Membrane bound Golgi	9.3	no	no
sr11905	chr01	1818666	1820072	-1	no	0.106	468	Cytoplasmic	6.4	no	no
sr11906	chr01	1821306	1821689	-1	no	0.156	96	Cytoplasmic	7.2	no	no
sr11907	chr01	1828361	1831366	1	no	0.111	1001	Cytoplasmic	4	no	no
sr11908	chr01	1833513	1837508	-1	yes	0.696	1331	Plasma membrane	5.8	yes	yes
sr11909	chr01	1838409	1840979	-1	no	0.18	856	Membrane bound Vacuolar	9.6	no	no
sr11910	chr01	1841446	1843764	1	no	0.201	772	Plasma membrane	8.6	no	no
sr11911	chr01	1844016	1844927	1	no	0.133	282	Membrane bound Mitochondrial	7.2	no	no
sr11912	chr01	1845207	1846004	-1	no	0.258	265	Mitochondrial	9.9	no	no
sr11913	chr01	1846735	1847618	1	no	0.297	268	Membrane bound Mitochondrial	9.9	no	no
sr11914	chr01	1847852	1849909	-1	no	0.174	685	Membrane bound Mitochondrial	9.3	no	no
sr11915	chr01	1851055	1852377	-1	no	0.112	440	Nuclear	6.1	no	no
sr11916	chr01	1855398	1857326	1	no	0.128	642	Plasma membrane	8.6	no	no
sr11917	chr01	1857440	1858381	-1	no	0.236	313	Membrane bound Mitochondrial	6.5	no	no
sr11918	chr01	1860934	1862190	1	yes	0.916	418	Membrane bound Extracellular (Secreted)	4.1	yes	yes
sr11919	chr01	1862819	1867789	1	no	0.143	1656	Plasma membrane	4.4	no	no
sr11920	chr01	1868766	1870949	1	no	0.118	727	Cytoplasmic	3.5	no	no
sr11921	chr01	1871403	1873301	-1	no	0.119	632	Nuclear	6.5	no	no
sr11922	chr01	1878504	1880125	-1	no	0.11	357	Membrane bound Mitochondrial	4.2	no	no
sr11923	chr01	1880439	1880675	1	no	0.158	78	Membrane bound Mitochondrial	9.5	no	no
sr11924	chr01	1881119	1886335	-1	no	0.103	1738	Nuclear	2.6	no	no
sr11925	chr01	1888613	1891600	-1	no	0.1	995	Cytoplasmic	5.1	no	no
sr11926	chr01	1892383	1893357	1	no	0.219	324	Membrane bound Mitochondrial	8.3	no	no
sr11927	chr01	1894084	1895445	-1	no	0.173	453	Cytoplasmic	3	no	no
sr11928	chr01	1896308	1897120	1	no	0.101	150	Cytoplasmic	4.4	no	no
sr11929	chr01	1897509	1898384	1	no	0.283	291	Membrane bound Mitochondrial	5.8	no	no
sr11930	chr01	1898421	1900220	-1	no	0.108	599	Membrane bound Mitochondrial	6.4	no	no
sr11931	chr01	1900558	1901739	-1	no	0.198	393	Cytoplasmic	8.1	no	no
sr11932	chr01	1902162	1904312	-1	no	0.111	716	Mitochondrial	4.5	no	no
sr11933	chr01	1905115	1907505	-1	no	0.168	796	Membrane bound Mitochondrial	9.3	no	no
sr11934	chr01	1908298	1909953	1	no	0.142	551	Membrane bound Endoplasmic reticulum	6.6	no	no
sr11935	chr01	1910020	1910640	-1	no	0.17	206	Golgi	9.7	no	no
sr11936	chr01	1911420	1913213	1	yes	0.816	597	Membrane bound Golgi	4.2	yes	yes
sr11937	chr01	1914032	1914763	-1	no	0.1	243	Cytoplasmic	5.8	no	no
sr11938	chr01	1916890	1917692	1	no	0.117	151	Cytoplasmic	5.8	no	no
sr11939	chr01	1918083	1920731	-1	no	0.123	882	Membrane bound Mitochondrial	8.2	no	no
sr11940	chr01	1921730	1923688	-1	no	0.123	652	Cytoplasmic	4.9	no	no
sr11941	chr01	1924848	1927412	1	no	0.126	854	Membrane bound Mitochondrial	3.5	no	no
sr11942	chr01	1927802	1928896	-1	no	0.102	364	Nuclear	4.7	no	no
sr11943	chr01	1929846	1931174	-1	no	0.11	442	Nuclear	10	no	no
sr11944	chr01	1932381	1933838	1	yes	0.615	485	Plasma membrane	9.1	yes	no
sr11945	chr01	1935028	1937688	1	no	0.138	886	Membrane bound Mitochondrial	6.6	no	no
sr17607	chr01	1938098	1938574	1	no	0.102	136	Mitochondrial	8.9	no	no
sr11946	chr01	1938778	1941333	-1	no	0.177	851	Cytoplasmic	8.2	no	no
sr11947	chr01	1942809	1943755	-1	yes	0.923	283	Membrane bound Mitochondrial	7.3	yes	yes
sr11948	chr01	1944371	1945413	1	no	0.123	318	Nuclear	6	no	no
sr11949	chr01	1945946	1946299	-1	no	0.24	86	Membrane bound Mitochondrial	7.5	no	no
sr11950	chr01	1946737	1947993	-1	no	0.1	418	Cytoplasmic	3.1	no	no
sr11951	chr01	1948398	1949430	1	no	0.159	315	Nuclear	5.7	no	no
sr11952	chr01	1949635	1952388	-1	no	0.101	917	Nuclear	6.4	no	no
sr11953	chr01	1953597	1953904	1	no	0.1	75	Mitochondrial	5	no	no
sr11954	chr01	1954063	1955271	-1	no	0.103	402	Nuclear	4.9	no	no
sr11955	chr01	1956893	1959559	1	no	0.104	888	Plasma membrane	6.5	no	no
sr11956	chr01	1966870	1968978	1	no	0.106	702	Nuclear	6.2	no	no
sr11957	chr01	1969361	1972963	-1	no	0.118	1200	Plasma membrane	4.3	no	no
sr11958	chr01	1974824	1975807	1	no	0.112	327	Peroxisomal	9.2	no	no
sr11959	chr01	1976565	1977450	1	no	0.112	200	Mitochondrial	8.4	no	no
sr11960	chr01	1979475	1980725	1	no	0.115	358	Cytoplasmic	10	no	no
sr11961	chr01	1980896	1982842	-1	no	0.104	648	Nuclear	4.2	no	no
sr11962	chr01	1983481	1985805	1	no	0.16	774	Membrane bound Mitochondrial	9.1	no	no
sr11963	chr01	1985865	1987583	-1	no	0.102	572	Membrane bound Mitochondrial	8.3	no	no
sr11964	chr01	1987771	1988023	1	no	0.121	54	Membrane bound Mitochondrial	7.6	no	no
sr11965	chr01	1989313	1993986	-1	no	0.122	1557	Nuclear	7	no	no
sr11966	chr01	1994819	1996540	1	no	0.105	573	Plasma membrane	5.1	no	no
sr11967	chr01	1996838	1997815	1	no	0.108	303	Nuclear	6.3	no	no
sr11968	chr01	1998000	1998398	-1	no	0.108	105	Mitochondrial	9.9	no	no
sr11969	chr01	1999366	2000517	1	no	0.214	383	Membrane bound Mitochondrial	7.2	no	no
sr11970	chr01	2000586	2001965	-1	no	0.125	459	Membrane bound Mitochondrial	8.5	no	no
sr11971	chr01	2002206	2003738	1	no	0.345	510	Mitochondrial	4.7	no	no
sr11972	chr01	2004241	2005734	-1	no	0.112	497	Nuclear	9.9	no	no
sr11973	chr01	2006253	2007173	1	no	0.102	125	Cytoplasmic	9.6	no	no
sr11974	chr01	2007870	2010360	1	no	0.106	797	Nuclear	3.7	no	no
sr11975	chr01	2010452	2011681	-1	yes	0.698	409	Membrane bound Extracellular (Secreted)	9.9	yes	no
sr11976	chr01	2012303	2014465	-1	no	0.109	720	Nuclear	6	no	no
sr11977	chr01	2014901	2015692	1	no	0.183	263	Membrane bound Extracellular (Secreted)	5.1	no	no
sr11978	chr01	2015832	2018414	-1	no	0.103	860	Nuclear	5.8	no	no
sr11979	chr01	2020612	2021412	-1	yes	0.818	266	Membrane bound Extracellular (Secreted)	5	yes	yes
sr11980	chr01	2023899	2025929	1	no	0.107	676	Nuclear	5.3	no	no
sr11981	chr01	2027608	2032623	1	no	0.134	1669	Cytoplasmic	3.8	no	no
sr11982	chr01	2033129	2034532	1	no	0.105	403	Mitochondrial	7.7	no	no
sr11983	chr01	2035247	2037340	1	yes	0.794	697	Membrane bound Lysosomal	6.9	yes	yes
sr11984	chr01	2038458	2044457	-1	no	0.115	1998	Plasma membrane	7	no	no
sr11985	chr01	2046149	2048029	1	no	0.104	626	Nuclear	8.8	no	no
sr11986	chr01	2048276	2049785	-1	no	0.123	481	Nuclear	3.5	no	no
sr11987	chr01	2050431	2052068	1	no	0.114	545	Nuclear	5.8	no	no
sr11988	chr01	2052138	2053205	-1	no	0.131	355	Membrane bound Mitochondrial	9.3	no	no
sr11989	chr01	2054045	2055925	-1	no	0.111	626	Nuclear	6.2	no	no
sr11990	chr01	2057017	2062560	-1	no	0.103	1847	Cytoplasmic	4.1	no	no
sr11991	chr01	2064867	2065916	1	no	0.106	349	Cytoplasmic	10	no	no
sr11992	chr01	2066591	2067306	1	no	0.155	215	Extracellular (Secreted)	3.6	yes	no
sr11993	chr01	2067436	2070276	-1	no	0.166	946	Membrane bound Mitochondrial	7.5	no	no
sr11994	chr01	2072632	2076963	1	no	0.109	1443	Nuclear	6.6	no	no
sr11995	chr01	2078363	2081041	1	no	0.101	892	Plasma membrane	3.8	no	no
sr11996	chr01	2081886	2083652	1	no	0.109	588	Membrane bound Lysosomal	8.4	no	no
sr11997	chr01	2084449	2084943	1	no	0.173	164	Membrane bound Mitochondrial	9.9	no	no
sr11998	chr01	2085167	2087842	-1	no	0.109	891	Nuclear	4.6	no	no
sr11999	chr01	2088204	2088989	1	no	0.112	261	Cytoplasmic	9.7	no	no
sr12000	chr01	2089203	2094056	-1	no	0.102	1617	Plasma membrane	9.2	no	no
sr12001	chr01	2096283	2098478	1	no	0.099	731	Nuclear	6	no	no
sr12002	chr01	2098872	2099852	1	yes	0.913	326	Extracellular (Secreted)	9.2	yes	yes
sr12003	chr01	2100049	2101143	-1	no	0.104	364	Nuclear	5.5	no	no
sr12004	chr01	2101609	2102054	1	no	0.101	83	Mitochondrial	9.6	no	no
sr12005	chr01	2103082	2103803	1	no	0.141	211	Plasma membrane	9.6	no	no
sr12006	chr01	2104500	2106238	1	no	0.144	508	Membrane bound Mitochondrial	10	no	no
sr12007	chr01	2107160	2107567	1	no	0.259	135	Plasma membrane	3.3	no	no
sr12008	chr01	2108047	2109972	-1	no	0.102	641	Membrane bound Vacuolar	7.1	no	no
sr12009	chr01	2110754	2115814	1	no	0.103	1686	Cytoplasmic	8.2	no	no
sr12010	chr01	2115964	2117004	-1	no	0.235	346	Cytoplasmic	9.1	no	no
sr12011	chr01	2117560	2119365	1	no	0.123	601	Nuclear	4.9	no	no
sr12012	chr01	2119505	2120809	-1	yes	0.826	434	Membrane bound Extracellular (Secreted)	5.4	yes	yes
sr12013	chr01	2124077	2125534	1	no	0.145	485	Plasma membrane	9.8	no	no
sr12014	chr01	2125840	2126838	-1	no	0.109	332	Nuclear	5.9	no	no
sr12015	chr01	2127388	2128428	-1	no	0.189	322	Membrane bound Mitochondrial	9.8	no	no
sr12016	chr01	2128764	2133737	-1	no	0.113	1657	Plasma membrane	6.4	no	no
sr12017	chr01	2136828	2138816	1	no	0.103	662	Nuclear	3.6	no	no
sr12018	chr01	2138928	2145749	-1	no	0.104	2273	Membrane bound Endoplasmic reticulum	6.6	no	no
sr12019	chr01	2146601	2147703	1	no	0.124	341	Cytoplasmic	7.1	no	no
sr12020	chr01	2147982	2150411	-1	yes	0.667	577	Plasma membrane	3.1	yes	yes
sr12021	chr01	2152294	2153090	1	no	0.12	237	Plasma membrane	4.5	no	no
sr12022	chr01	2154620	2159878	1	no	0.102	1752	Cytoplasmic	4.9	no	no
sr12023	chr01	2161197	2161922	1	yes	0.833	241	Plasma membrane	7	yes	yes
sr12024	chr01	2164345	2167608	1	no	0.136	1087	Nuclear	7.4	no	no
sr12025	chr01	2168520	2170201	-1	no	0.099	538	Nuclear	6.3	no	no
sr12026	chr01	2170700	2173039	-1	no	0.102	779	Nuclear	3.7	no	no
sr12027	chr01	2173826	2178921	-1	no	0.115	1650	Cytoplasmic	3.8	no	no
sr12028	chr01	2182325	2185990	-1	no	0.163	1221	Nuclear	9.7	no	no
sr12029	chr01	2186973	2187545	-1	no	0.248	190	Membrane bound Endoplasmic reticulum	6.8	no	no
sr12030	chr01	2189125	2192658	1	no	0.101	1177	Cytoplasmic	8	no	no
sr12031	chr01	2192837	2194537	-1	no	0.179	566	Membrane bound Mitochondrial	6.6	no	no
sr12032	chr01	2195421	2199068	1	no	0.159	1215	Nuclear	5	no	no
sr12033	chr01	2199446	2202175	1	no	0.102	909	Membrane bound Mitochondrial	6.7	no	no
sr12034	chr01	2202266	2204332	-1	no	0.2	688	Nuclear	5	no	no
sr12035	chr01	2204685	2206871	1	no	0.105	728	Cytoplasmic	9.4	no	no
sr12036	chr01	2206987	2207550	-1	no	0.129	187	Mitochondrial	7.8	no	no
sr12037	chr01	2207943	2208699	1	no	0.107	70	Plasma membrane	4.5	no	no
sr12038	chr01	2209446	2211087	-1	no	0.094	123	Nuclear	4.3	no	no
sr12039	chr01	2212078	2216082	-1	no	0.233	1334	Membrane bound Vacuolar	6.6	no	no
sr12041	chr01	2219298	2221325	1	no	0.117	675	Membrane bound Golgi	6.6	no	no
sr12042	chr01	2221628	2223481	-1	no	0.108	617	Nuclear	9	no	no
sr12043	chr01	2228745	2234477	-1	no	0.104	1910	Nuclear	6.8	no	no
sr12044	chr01	2238295	2238936	1	no	0.103	213	Extracellular (Secreted)	8.1	yes	yes
sr12045	chr01	2239322	2239941	1	no	0.113	159	Mitochondrial	6.3	no	no
sr12046	chr01	2240164	2241729	-1	no	0.107	521	Nuclear	6.4	no	no
sr12047	chr01	2242190	2243643	-1	no	0.154	452	Cytoplasmic	9.7	no	no
sr12048	chr01	2244606	2249837	1	no	0.239	1743	Plasma membrane	3.2	no	no
sr12049	chr01	2249946	2252021	-1	no	0.101	691	Membrane bound Mitochondrial	5.1	no	no
sr12050	chr01	2252302	2254314	-1	no	0.106	638	Nuclear	6	no	no
sr12051	chr01	2257597	2259483	1	no	0.175	628	Membrane bound Mitochondrial	4.8	no	no
sr12052	chr01	2259730	2263647	1	no	0.137	1305	Membrane bound Vacuolar	5.4	no	no
sr12053	chr01	2263988	2265670	1	no	0.102	474	Nuclear	4	no	no
sr12054	chr01	2265743	2267122	-1	no	0.118	425	Nuclear	5	no	no
sr12055	chr01	2268366	2270513	-1	no	0.158	715	Plasma membrane	2.7	no	no
sr12056	chr01	2272116	2274749	-1	no	0.118	877	Nuclear	7.3	no	no
sr12057	chr01	2276271	2278880	1	no	0.138	869	Membrane bound Golgi	9.2	no	no
sr12058	chr01	2279330	2286277	1	no	0.106	2315	Cytoplasmic	2.5	no	no
sr12059	chr01	2286602	2288392	-1	no	0.133	596	Nuclear	6.8	no	no
sr12060	chr01	2290345	2293176	1	no	0.119	943	Membrane bound Mitochondrial	8.7	no	no
sr12061	chr01	2293342	2294510	-1	no	0.104	329	Nuclear	5.7	no	no
sr12062	chr01	2295278	2297338	1	no	0.2	686	Cytoplasmic	9.9	no	no
sr12063	chr01	2298684	2300285	1	no	0.108	533	Nuclear	4.8	no	no
sr12064	chr01	2300765	2301863	1	no	0.118	68	Mitochondrial	5.6	no	no
sr12065	chr01	2302565	2303077	-1	no	0.098	170	Membrane bound Mitochondrial	3.6	no	no
sr12066	chr01	2304588	2305260	1	no	0.147	193	Plasma membrane	8.2	no	no
sr12067	chr01	2305781	2308471	-1	no	0.121	896	Nuclear	4.2	no	no
sr12068	chr01	2309485	2313987	1	no	0.127	1500	Plasma membrane	5.9	no	no
sr12069	chr01	2314204	2314886	-1	no	0.296	131	Mitochondrial	10	no	no
sr12070	chr01	2315355	2316203	1	no	0.123	282	Mitochondrial	7.8	no	no
sr12071	chr01	2316813	2320067	1	no	0.133	1084	Membrane bound Mitochondrial	8.2	no	no
sr12072	chr01	2320621	2321577	1	yes	0.892	318	Nuclear	4	yes	yes
sr12073	chr01	2322448	2325330	1	no	0.119	960	Nuclear	5.7	no	no
sr12074	chr01	2325415	2326518	-1	no	0.161	367	Membrane bound Mitochondrial	5.6	no	no
sr12075	chr01	2327471	2328664	-1	no	0.101	397	Cytoplasmic	3.3	no	no
sr12076	chr01	2329852	2330874	1	no	0.424	340	Nuclear	5.3	no	no
sr12077	chr01	2331059	2333884	-1	no	0.145	941	Membrane bound Mitochondrial	4	no	no
sr12078	chr01	2334123	2336045	1	no	0.231	640	Plasma membrane	4	no	no
sr12079	chr01	2336698	2338839	1	no	0.169	510	Membrane bound Mitochondrial	10	no	no
sr12080	chr01	2339001	2340797	-1	no	0.138	598	Mitochondrial	7.6	no	no
sr12081	chr01	2341174	2343105	-1	no	0.142	643	Membrane bound Mitochondrial	9.3	no	no
sr12082	chr01	2346101	2350912	1	no	0.107	1603	Plasma membrane	4.4	no	no
sr12083	chr01	2352733	2355534	1	no	0.119	933	Membrane bound Extracellular (Secreted)	6.4	no	no
sr12084	chr01	2356302	2356935	1	yes	0.812	185	Membrane bound Extracellular (Secreted)	7.8	yes	yes
sr12085	chr01	2357697	2358356	1	yes	0.816	163	Extracellular (Secreted)	9.8	yes	yes
sr12086	chr01	2359122	2359782	1	yes	0.83	164	Extracellular (Secreted)	9.1	yes	yes
sr12087	chr01	2361281	2361938	-1	yes	0.865	171	Membrane bound Endoplasmic reticulum	6.2	yes	yes
sr12088	chr01	2362558	2363634	-1	no	0.1	358	Nuclear	3.2	no	no
sr12089	chr01	2365593	2367515	1	no	0.101	640	Plasma membrane	9.7	no	no
sr12090	chr01	2368520	2369557	-1	no	0.145	345	Membrane bound Mitochondrial	4.7	no	no
sr12091	chr01	2370038	2374171	1	no	0.111	1377	Plasma membrane	2.8	no	no
sr12092	chr01	2374358	2376745	-1	no	0.118	795	Nuclear	4	no	no
sr12093	chr01	2380481	2382673	1	no	0.103	730	Membrane bound Endoplasmic reticulum	7.1	no	no
sr12094	chr01	2383379	2389168	1	no	0.114	1929	Cytoplasmic	8.2	no	no
sr12095	chr01	2389646	2391477	-1	no	0.106	531	Nuclear	9.9	no	no
sr12096	chr01	2392162	2393847	1	no	0.436	561	Plasma membrane	3.9	no	no
sr12097	chr01	2393986	2394771	-1	yes	0.706	236	Membrane bound Mitochondrial	4.4	yes	yes
sr12098	chr01	2395071	2396408	1	no	0.122	445	Membrane bound Golgi	3.1	no	no
sr12099	chr01	2396471	2397363	-1	no	0.102	275	Nuclear	2.6	no	no
sr12100	chr01	2397749	2398789	-1	no	0.111	291	Nuclear	10	no	no
sr12101	chr01	2399128	2402067	1	no	0.118	979	Cytoplasmic	7.3	no	no
sr12102	chr01	2402953	2404167	1	no	0.141	404	Membrane bound Lysosomal	5.3	no	no
sr12103	chr01	2404267	2404836	-1	no	0.106	167	Mitochondrial	9.2	no	no
sr12104	chr01	2405181	2407682	-1	no	0.1	833	Nuclear	5	no	no
sr12105	chr01	2408100	2409167	1	no	0.179	355	Membrane bound Mitochondrial	5.6	no	no
sr12106	chr01	2409362	2411854	-1	no	0.128	830	Membrane bound Mitochondrial	6.6	no	no
sr12107	chr01	2413892	2416291	1	no	0.134	799	Nuclear	5.7	no	no
sr12108	chr01	2418557	2422801	-1	no	0.121	1414	Nuclear	3.8	no	no
sr12109	chr01	2424769	2426796	-1	no	0.101	610	Plasma membrane	8.6	no	no
sr12110	chr01	2429060	2430451	1	no	0.117	359	Cytoplasmic	6.4	no	no
sr12111	chr01	2430638	2432077	-1	no	0.108	479	Cytoplasmic	6.9	no	no
sr12112	chr01	2432457	2434958	1	no	0.104	833	Membrane bound Mitochondrial	6.5	no	no
sr12113	chr01	2435516	2437024	1	no	0.125	502	Cytoplasmic	9.1	no	no
sr12114	chr01	2437108	2440453	-1	no	0.125	1083	Cytoplasmic	3.7	no	no
sr12115	chr01	2440841	2441944	-1	no	0.48	330	Membrane bound Extracellular (Secreted)	9.2	no	no
sr12116	chr01	2443134	2445311	-1	no	0.101	725	Plasma membrane	6.3	no	no
sr12117	chr01	2447211	2448206	-1	no	0.128	331	Cytoplasmic	5.9	no	no
sr12118	chr02	1089	2194	1	no	0.41	245	Plasma membrane	5.9	no	no
sr12119	chr02	2586	4541	1	no	0.105	651	Membrane bound Mitochondrial	7.3	no	no
sr12120	chr02	4672	5940	-1	no	0.139	422	Membrane bound Mitochondrial	8.5	no	no
sr12121	chr02	6835	7767	1	no	0.146	310	Mitochondrial	9.2	no	no
sr12122	chr02	7897	10203	-1	no	0.111	768	Membrane bound Mitochondrial	9.1	no	no
sr12123	chr02	10559	13105	-1	no	0.107	848	Plasma membrane	2.5	no	no
sr12124	chr02	14818	16854	1	yes	0.701	678	Membrane bound Extracellular (Secreted)	4.8	yes	yes
sr12125	chr02	19010	21458	1	no	0.109	698	Plasma membrane	4.9	no	no
sr12126	chr02	23663	26720	1	no	0.15	961	Membrane bound Endoplasmic reticulum	8	no	no
sr12127	chr02	27950	29818	1	no	0.102	622	Membrane bound Mitochondrial	3.8	no	no
sr12128	chr02	29933	32617	-1	no	0.106	894	Plasma membrane	2.4	no	no
sr12129	chr02	33539	35354	1	no	0.11	579	Plasma membrane	8.8	no	no
sr12130	chr02	35503	35835	-1	no	0.133	110	Extracellular (Secreted)	2.8	yes	no
sr12131	chr02	36570	37447	1	no	0.107	267	Membrane bound Endoplasmic reticulum	6.2	no	no
sr12132	chr02	37888	39963	1	no	0.119	666	Cytoplasmic	6.8	no	no
sr12133	chr02	39976	41052	-1	no	0.108	358	Nuclear	10	no	no
sr12134	chr02	41783	42676	1	no	0.198	297	Membrane bound Mitochondrial	9.8	no	no
sr12135	chr02	43059	44783	-1	no	0.103	546	Membrane bound Golgi	8.8	no	no
sr12136	chr02	46871	48565	1	no	0.24	502	Membrane bound Mitochondrial	6.6	no	no
sr12137	chr02	49014	51452	-1	no	0.105	767	Nuclear	6.9	no	no
sr17065	chr02	52656	53297	-1	yes	0.503	213	Plasma membrane	5.4	yes	yes
sr12138	chr02	61911	63653	1	no	0.117	580	Membrane bound Mitochondrial	9.3	no	no
sr12139	chr02	64796	66499	1	yes	0.901	567	Plasma membrane	7.7	yes	yes
sr12140	chr02	66684	67066	-1	no	0.226	102	Membrane bound Mitochondrial	6.8	no	no
sr12141	chr02	67680	69164	1	no	0.103	494	Nuclear	3.8	no	no
sr12142	chr02	72594	73892	1	no	0.166	353	Membrane bound Mitochondrial	7.2	no	no
sr12143	chr02	74577	75104	1	no	0.152	175	Mitochondrial	10	no	no
sr12144	chr02	75366	77570	-1	no	0.139	734	Membrane bound Peroxisomal	5.7	no	no
sr12145	chr02	78004	79422	1	no	0.111	178	Extracellular (Secreted)	9.9	yes	yes
sr12146	chr02	79874	80305	-1	no	0.211	143	Plasma membrane	5.2	no	no
sr12147	chr02	80809	83595	-1	no	0.119	928	Plasma membrane	4.4	no	no
sr12148	chr02	85335	86462	-1	no	0.107	375	Cytoplasmic	6.6	no	no
sr12149	chr02	87044	88363	1	no	0.263	439	Membrane bound Mitochondrial	7	no	no
sr12150	chr02	88442	92626	-1	no	0.122	1394	Cytoplasmic	4.2	no	no
sr12151	chr02	93965	94889	-1	no	0.114	135	Cytoplasmic	8.5	no	no
sr12152	chr02	96776	97723	1	no	0.1	106	Cytoplasmic	10	no	no
sr12153	chr02	98199	99569	-1	no	0.124	456	Cytoplasmic	9.2	no	no
sr12154	chr02	100005	101363	1	no	0.108	452	Cytoplasmic	10	no	no
sr12155	chr02	101464	102537	-1	no	0.11	357	Cytoplasmic	3.6	no	no
sr12156	chr02	103142	104170	-1	no	0.139	130	Cytoplasmic	9.9	no	no
sr12157	chr02	105680	106942	1	no	0.107	145	Cytoplasmic	9.4	no	no
sr12158	chr02	107604	109490	1	no	0.136	628	Membrane bound Mitochondrial	9.3	no	no
sr12159	chr02	109635	110223	-1	no	0.102	120	Cytoplasmic	6.9	no	no
sr12160	chr02	110499	113429	1	no	0.114	976	Membrane bound Mitochondrial	6.6	no	no
sr12161	chr02	113682	118031	-1	no	0.106	1449	Nuclear	5.8	no	no
sr12162	chr02	121070	122971	1	no	0.116	633	Cytoplasmic	3.9	no	no
sr12163	chr02	123856	125856	1	yes	0.821	666	Plasma membrane	2.5	yes	yes
sr12164	chr02	126028	127468	-1	no	0.098	452	Membrane bound Extracellular (Secreted)	9.9	no	no
sr12165	chr02	131323	133182	1	yes	0.743	619	Membrane bound Lysosomal	7.9	yes	yes
sr17063	chr02	133979	134068	1	no	0.233	29	Plasma membrane	7.9	no	no
sr12166	chr02	134626	135993	-1	no	0.106	455	Membrane bound Mitochondrial	6.3	no	no
sr12167	chr02	136696	139125	1	no	0.211	809	Cytoplasmic	5.3	no	no
sr12168	chr02	140144	141166	1	no	0.125	340	Membrane bound Mitochondrial	5.4	no	no
sr12169	chr02	141397	142914	-1	no	0.1	505	Cytoplasmic	3.9	no	no
sr12170	chr02	144307	147450	-1	no	0.123	1047	Nuclear	6.1	no	no
sr12171	chr02	150355	151929	-1	yes	0.863	524	Extracellular (Secreted)	3.3	yes	yes
sr12172	chr02	152877	154091	1	no	0.139	360	Membrane bound Golgi	5.4	no	no
sr12173	chr02	154173	155477	-1	no	0.148	434	Membrane bound Endoplasmic reticulum	5.2	no	no
sr12174	chr02	155711	156358	1	no	0.111	215	Nuclear	5.1	no	no
sr12175	chr02	156457	158493	-1	yes	0.69	678	Membrane bound Mitochondrial	7.1	yes	yes
sr12176	chr02	158933	163726	-1	no	0.108	1597	Plasma membrane	3.8	no	no
sr12177	chr02	164946	169124	-1	no	0.205	1392	Cytoplasmic	3	no	no
sr12178	chr02	174239	175160	1	yes	0.72	281	Membrane bound Extracellular (Secreted)	5.8	yes	yes
sr12179	chr02	176353	178311	1	no	0.11	652	Membrane bound Mitochondrial	8.9	no	no
sr12180	chr02	178491	179386	-1	no	0.111	272	Cytoplasmic	4.7	no	no
sr12181	chr02	179643	182021	1	no	0.176	792	Membrane bound Mitochondrial	5	no	no
sr12182	chr02	182176	183051	-1	no	0.122	291	Membrane bound Extracellular (Secreted)	7.5	no	no
sr12183	chr02	183332	185395	-1	no	0.104	687	Membrane bound Mitochondrial	8.4	no	no
sr12184	chr02	186072	188813	1	no	0.102	913	Plasma membrane	5.1	no	no
sr12185	chr02	191815	199662	1	no	0.103	2581	Membrane bound Mitochondrial	6.8	no	no
sr12186	chr02	200844	202601	-1	no	0.111	585	Nuclear	6.3	no	no
sr12187	chr02	205309	207510	-1	yes	0.839	733	Plasma membrane	8.3	yes	no
sr12235	chr02	208741	209381	1	no	0.101	182	Nuclear	7	no	no
sr12234	chr02	209630	211519	-1	no	0.101	629	Membrane bound Mitochondrial	4.8	no	no
sr12233	chr02	212626	215004	-1	no	0.123	792	Membrane bound Mitochondrial	8.8	no	no
sr12232	chr02	216505	218907	1	no	0.102	767	Cytoplasmic	8	no	no
sr12231	chr02	219516	223394	1	no	0.101	1292	Cytoplasmic	4.8	no	no
sr12230	chr02	223435	224913	-1	no	0.256	492	Nuclear	4.9	no	no
sr12229	chr02	225684	226745	-1	no	0.117	353	Membrane bound Mitochondrial	6.2	no	no
sr12228	chr02	227613	229076	1	no	0.206	487	Nuclear	7	no	no
sr12227	chr02	229400	232423	1	no	0.117	1007	Nuclear	4.9	no	no
sr12226	chr02	232488	233507	-1	no	0.103	339	Nuclear	6	no	no
sr12225	chr02	233825	236890	1	no	0.107	1021	Nuclear	4.2	no	no
sr12224	chr02	237365	237979	-1	no	0.133	204	Mitochondrial	4.4	no	no
sr12223	chr02	240202	240594	1	no	0.102	130	Cytoplasmic	9.9	no	no
sr12222	chr02	241273	243114	1	no	0.107	613	Nuclear	7.2	no	no
sr12221	chr02	244439	246029	1	no	0.114	457	Cytoplasmic	10	no	no
sr12220	chr02	248891	250159	1	no	0.126	422	Membrane bound Mitochondrial	5.4	no	no
sr12219	chr02	250425	251642	1	no	0.101	405	Nuclear	3	no	no
sr12218	chr02	251908	254466	1	no	0.106	852	Nuclear	6.3	no	no
sr12217	chr02	255144	255836	1	no	0.108	230	Nuclear	5.5	no	no
sr12216	chr02	256441	257599	-1	no	0.098	353	Nuclear	4.5	no	no
sr12215	chr02	258020	258973	-1	no	0.201	317	Membrane bound Mitochondrial	9.9	no	no
sr12214	chr02	260795	261452	-1	no	0.103	188	Nuclear	4.7	no	no
sr12213	chr02	262205	265048	1	no	0.103	946	Cytoplasmic	4.7	no	no
sr12212	chr02	267020	269674	1	no	0.108	884	Membrane bound Mitochondrial	2.5	no	no
sr12211	chr02	271958	273859	1	yes	0.677	633	Membrane bound Extracellular (Secreted)	6.9	yes	yes
sr12210	chr02	274406	275053	1	no	0.208	149	Mitochondrial	7.9	no	no
sr12209	chr02	275257	276597	-1	no	0.207	421	Plasma membrane	8.1	no	no
sr12208	chr02	277262	281743	1	no	0.1	1493	Nuclear	4.7	no	no
sr12207	chr02	281920	282598	-1	no	0.109	196	Mitochondrial	5.9	no	no
sr12206	chr02	283288	287154	1	no	0.113	1288	Cytoplasmic	7.3	no	no
sr12205	chr02	287371	288075	-1	no	0.109	234	Membrane bound Mitochondrial	4.9	no	no
sr12204	chr02	288532	290340	1	no	0.152	492	Membrane bound Mitochondrial	6.3	no	no
sr12203	chr02	290753	291320	1	no	0.115	124	Extracellular (Secreted)	3.4	yes	no
sr12202	chr02	292136	293168	1	no	0.115	268	Membrane bound Golgi	4.1	no	no
sr12201	chr02	293837	296587	1	yes	0.563	916	Membrane bound Endoplasmic reticulum	7.4	yes	yes
sr12200	chr02	301383	303852	1	no	0.101	794	Nuclear	6.1	no	no
sr12199	chr02	304500	307607	1	no	0.125	1035	Nuclear	4.9	no	no
sr12198	chr02	307691	308590	-1	no	0.13	299	Membrane bound Mitochondrial	3.5	no	no
sr12197	chr02	309660	310865	1	no	0.105	401	Cytoplasmic	9.7	no	no
sr12196	chr02	311076	315680	-1	no	0.102	1311	Nuclear	4.1	no	no
sr12195	chr02	319897	322467	1	no	0.136	856	Membrane bound Mitochondrial	10	no	no
sr12194	chr02	322750	325278	-1	no	0.102	842	Nuclear	4.3	no	no
sr12193	chr02	326418	330626	1	no	0.111	1402	Cytoplasmic	5.5	no	no
sr12192	chr02	330925	334053	-1	no	0.107	1042	Nuclear	6.5	no	no
sr12191	chr02	335062	336670	1	no	0.105	503	Nuclear	10	no	no
sr12190	chr02	341897	344338	1	no	0.11	813	Nuclear	6.9	no	no
sr12189	chr02	345538	346099	-1	no	0.109	80	Nuclear	7.3	no	no
sr12188	chr02	347146	348992	1	yes	0.648	547	Nuclear	3.4	yes	yes
sr12237	chr02	349663	356124	-1	no	0.144	2153	Membrane bound Endoplasmic reticulum	2.9	no	no
sr12238	chr02	357068	358331	1	no	0.21	133	Membrane bound Mitochondrial	6.3	no	no
sr12239	chr02	358810	361065	-1	no	0.102	751	Membrane bound Endoplasmic reticulum	7.1	no	no
sr12240	chr02	362723	364321	-1	no	0.099	154	Cytoplasmic	9.5	no	no
sr12241	chr02	367912	369033	1	no	0.112	373	Nuclear	6.4	no	no
sr12242	chr02	370847	373807	1	no	0.18	921	Membrane bound Mitochondrial	10	no	no
sr12243	chr02	374990	376546	-1	no	0.141	518	Nuclear	6	no	no
sr12244	chr02	380817	383747	-1	no	0.103	976	Nuclear	3.8	no	no
sr12245	chr02	384129	385994	1	no	0.102	621	Nuclear	5.1	no	no
sr12246	chr02	386201	388507	-1	no	0.115	768	Membrane bound Mitochondrial	3.2	no	no
sr12247	chr02	390099	393149	-1	no	0.111	1016	Cytoplasmic	4.1	no	no
sr12248	chr02	393761	394354	-1	no	0.168	197	Membrane bound Extracellular (Secreted)	9.4	no	no
sr12249	chr02	396113	397165	-1	no	0.124	350	Nuclear	9.8	no	no
sr12250	chr02	399349	402999	1	no	0.104	1216	Plasma membrane	4	no	no
sr12251	chr02	403664	404863	1	no	0.114	399	Membrane bound Golgi	7.4	no	no
sr12252	chr02	405867	407368	-1	no	0.115	467	Cytoplasmic	9.2	no	no
sr12253	chr02	409559	411193	1	no	0.104	544	Plasma membrane	8.5	no	no
sr12254	chr02	412554	414944	1	no	0.103	796	Plasma membrane	7.9	no	no
sr12255	chr02	415099	416616	-1	yes	0.736	505	Membrane bound Mitochondrial	7.9	yes	yes
sr12256	chr02	417181	420169	-1	no	0.126	839	Nuclear	5.3	no	no
sr12257	chr02	420886	421758	-1	yes	0.804	290	Extracellular (Secreted)	6.5	yes	yes
sr12258	chr02	424914	426218	1	no	0.112	434	Membrane bound Mitochondrial	8.5	no	no
sr12259	chr02	426758	427837	1	no	0.157	359	Membrane bound Mitochondrial	9.3	no	no
sr12260	chr02	427946	429613	-1	no	0.102	555	Nuclear	9.9	no	no
sr12261	chr02	430584	433256	-1	no	0.097	727	Nuclear	10	no	no
sr12262	chr02	433918	434841	1	no	0.106	307	Nuclear	6.2	no	no
sr12263	chr02	434976	437333	-1	no	0.105	785	Membrane bound Mitochondrial	5.3	no	no
sr12264	chr02	438356	441760	-1	no	0.111	1134	Cytoplasmic	3.7	no	no
sr12265	chr02	443867	444505	1	yes	0.681	212	Membrane bound Extracellular (Secreted)	8.1	yes	no
sr12266	chr02	448679	449416	1	no	0.111	245	Nuclear	5.4	no	no
sr12267	chr02	449829	451922	-1	no	0.205	697	Plasma membrane	7.8	no	no
sr12268	chr02	453148	455217	-1	no	0.313	689	Membrane bound Mitochondrial	2.8	no	no
sr12269	chr02	456415	457305	-1	no	0.118	296	Nuclear	6.2	no	no
sr12270	chr02	457558	459276	1	no	0.137	572	Membrane bound Mitochondrial	2.2	no	no
sr12271	chr02	459352	460591	-1	yes	0.852	386	Extracellular (Secreted)	8.3	yes	yes
sr12272	chr02	461403	462833	1	no	0.365	476	Membrane bound Golgi	6.6	no	no
sr12273	chr02	463024	463729	-1	no	0.141	161	Membrane bound Mitochondrial	7.3	no	no
sr12274	chr02	464530	465145	1	no	0.107	140	Cytoplasmic	9.8	no	no
sr12275	chr02	465662	466846	-1	no	0.109	210	Nuclear	7.8	no	no
sr12276	chr02	468758	469708	1	no	0.127	316	Cytoplasmic	3.9	no	no
sr12277	chr02	469845	473177	-1	no	0.1	1110	Nuclear	6.1	no	no
sr12278	chr02	474137	474933	-1	no	0.113	111	Cytoplasmic	5.1	no	no
sr12279	chr02	475353	481715	-1	no	0.102	2120	Cytoplasmic	4.3	no	no
sr12280	chr02	482520	483047	-1	no	0.107	146	Cytoplasmic	10	no	no
sr12281	chr02	485107	485466	-1	no	0.224	90	Mitochondrial	9.5	no	no
sr12282	chr02	488100	489131	1	no	0.12	343	Membrane bound Mitochondrial	4.1	no	no
sr12283	chr02	489590	493897	-1	no	0.145	1435	Plasma membrane	7.1	no	no
sr12284	chr02	495617	496510	-1	no	0.114	297	Mitochondrial	7.1	no	no
sr12285	chr02	496781	497977	1	no	0.147	398	Membrane bound Mitochondrial	8.8	no	no
sr12286	chr02	498118	499461	-1	no	0.115	447	Nuclear	6.8	no	no
sr12287	chr02	500341	501062	-1	no	0.128	215	Plasma membrane	9.6	no	no
sr12288	chr02	505339	508209	1	no	0.104	956	Plasma membrane	6.2	no	no
sr12289	chr02	508984	510036	1	no	0.103	350	Cytoplasmic	8.9	no	no
sr12290	chr02	510140	512240	-1	no	0.104	654	Nuclear	3.3	no	no
sr12291	chr02	512830	514227	1	no	0.157	465	Membrane bound Mitochondrial	7.6	no	no
sr12292	chr02	514317	516692	-1	no	0.102	791	Nuclear	4.4	no	no
sr12293	chr02	517924	521847	-1	no	0.155	1307	Cytoplasmic	3.9	no	no
sr12294	chr02	524517	526409	-1	no	0.143	630	Membrane bound Mitochondrial	9	no	no
sr12295	chr02	528262	530190	1	no	0.112	642	Nuclear	4	no	no
sr12296	chr02	530927	533239	1	no	0.111	770	Nuclear	5.7	no	no
sr12297	chr02	533875	538479	1	no	0.102	1534	Nuclear	6.3	no	no
sr12298	chr02	538803	540599	-1	no	0.121	598	Nuclear	5.3	no	no
sr12299	chr02	540903	542336	1	no	0.1	477	Nuclear	6.8	no	no
sr12300	chr02	542505	544199	-1	no	0.1	564	Cytoplasmic	7.3	no	no
sr12301	chr02	545834	546667	1	no	0.108	277	Nuclear	3.6	no	no
sr12302	chr02	547179	549170	1	no	0.126	663	Nuclear	5.8	no	no
sr12303	chr02	549312	550964	-1	no	0.114	550	Membrane bound Golgi	7.9	no	no
sr12304	chr02	551502	554687	1	no	0.123	1061	Cytoplasmic	4.2	no	no
sr12305	chr02	554733	555296	-1	no	0.135	187	Mitochondrial	6.7	no	no
sr12306	chr02	557787	561445	1	no	0.141	1152	Cytoplasmic	8.5	no	no
sr12307	chr02	561944	562831	1	no	0.143	264	Membrane bound Mitochondrial	9.5	no	no
sr12308	chr02	562915	565182	-1	no	0.311	755	Cytoplasmic	3.2	no	no
sr12309	chr02	565810	567852	1	no	0.118	680	Cytoplasmic	4.3	no	no
sr12310	chr02	568313	570826	1	no	0.104	837	Membrane bound Mitochondrial	5.8	no	no
sr12311	chr02	571607	573010	-1	no	0.106	467	Plasma membrane	6.6	no	no
sr12312	chr02	573949	574936	1	no	0.101	168	Cytoplasmic	10	no	no
sr12313	chr02	575524	577365	1	no	0.124	613	Membrane bound Mitochondrial	9.9	no	no
sr12314	chr02	577598	579403	-1	no	0.16	601	Cytoplasmic	7.6	no	no
sr12315	chr02	582952	583434	1	yes	0.866	160	Extracellular (Secreted)	9.3	yes	yes
sr12316	chr02	584520	587378	-1	no	0.101	952	Nuclear	6	no	no
sr12317	chr02	588434	592801	1	no	0.11	1455	Plasma membrane	6.9	no	no
sr12318	chr02	593312	594052	-1	yes	0.78	213	Cytoplasmic	3.9	yes	yes
sr12324	chr02	595141	598080	-1	no	0.106	979	Plasma membrane	9.7	no	no
sr12323	chr02	598669	599703	1	no	0.102	344	Nuclear	6.7	no	no
sr12322	chr02	599771	601462	-1	no	0.128	563	Mitochondrial	6.8	no	no
sr12321	chr02	601964	602428	-1	yes	0.935	154	Plasma membrane	7.2	yes	yes
sr12320	chr02	604107	607268	1	no	0.115	1053	Cytoplasmic	5.9	no	no
sr12319	chr02	607536	612629	-1	no	0.13	1697	Membrane bound Endoplasmic reticulum	4.4	no	no
sr12325	chr02	614038	615768	1	no	0.122	576	Membrane bound Mitochondrial	2	no	no
sr12326	chr02	615898	617247	-1	no	0.116	449	Membrane bound Mitochondrial	7.2	no	no
sr12327	chr02	617700	619952	-1	no	0.127	750	Cytoplasmic	4.3	no	no
sr12328	chr02	622131	629063	-1	no	0.103	2310	Nuclear	7.2	no	no
sr12329	chr02	630526	631215	1	no	0.114	229	Cytoplasmic	7.7	no	no
sr12330	chr02	631475	632029	-1	no	0.156	138	Cytoplasmic	5.8	no	no
sr12331	chr02	632712	636269	-1	no	0.101	1185	Cytoplasmic	4.1	no	no
sr12332	chr02	638668	641418	1	no	0.218	916	Plasma membrane	4	no	no
sr12333	chr02	641624	644464	-1	no	0.115	946	Nuclear	5	no	no
sr12334	chr02	645275	647077	1	no	0.108	600	Nuclear	8.3	no	no
sr12335	chr02	647253	647921	-1	no	0.123	222	Membrane bound Mitochondrial	6.7	no	no
sr12336	chr02	648394	653373	1	no	0.099	1659	Cytoplasmic	3.2	no	no
sr12337	chr02	653855	659440	1	no	0.145	1861	Plasma membrane	2.6	no	no
sr12338	chr02	659706	661019	-1	no	0.107	437	Cytoplasmic	9.9	no	no
sr12339	chr02	662539	664677	1	yes	0.835	712	Membrane bound Extracellular (Secreted)	9.3	yes	no
sr12340	chr02	664810	666189	-1	no	0.115	459	Membrane bound Golgi	8.8	no	no
sr12341	chr02	666664	668391	1	no	0.118	575	Membrane bound Mitochondrial	9.9	no	no
sr12342	chr02	668507	669868	-1	no	0.099	453	Membrane bound Peroxisomal	6.5	no	no
sr12343	chr02	670626	675914	-1	no	0.103	1762	Plasma membrane	3.4	no	no
sr12344	chr02	677646	680117	-1	no	0.114	823	Cytoplasmic	7	no	no
sr12345	chr02	681955	682716	1	no	0.137	253	Nuclear	5	no	no
sr12346	chr02	682756	685098	-1	no	0.106	780	Nuclear	6.3	no	no
sr12347	chr02	685624	687087	-1	no	0.104	487	Membrane bound Vacuolar	6.6	no	no
sr12348	chr02	690728	692290	1	no	0.105	520	Cytoplasmic	3.1	no	no
sr12349	chr02	692539	693825	-1	no	0.132	428	Mitochondrial	9.9	no	no
sr12350	chr02	694491	697733	-1	no	0.106	1080	Nuclear	6.7	no	no
sr12351	chr02	701265	702878	1	no	0.105	537	Plasma membrane	5.6	no	no
sr12360	chr02	704040	704318	-1	no	0.149	92	Mitochondrial	9.3	no	no
sr12359	chr02	705433	709065	-1	no	0.102	1210	Cytoplasmic	9.9	no	no
sr12358	chr02	711798	713618	-1	no	0.104	606	Membrane bound Mitochondrial	5.8	no	no
sr12357	chr02	716880	718183	1	no	0.141	154	Cytoplasmic	7.4	no	no
sr12356	chr02	719878	720807	1	no	0.105	309	Membrane bound Mitochondrial	9.9	no	no
sr12355	chr02	721171	721911	-1	no	0.116	246	Membrane bound Golgi	8.2	no	no
sr12354	chr02	722395	723036	1	no	0.22	213	Membrane bound Endoplasmic reticulum	7.6	no	no
sr12353	chr02	723344	725608	-1	no	0.118	754	Nuclear	5.4	no	no
sr12352	chr02	726475	728359	-1	no	0.109	600	Nuclear	5.6	no	no
sr12361	chr02	736415	736934	1	no	0.102	84	Nuclear	7.8	no	no
sr17358	chr02	737163	737824	-1	no	0.172	117	Membrane bound Mitochondrial	6.3	no	no
sr12362	chr02	738288	742733	-1	no	0.136	1481	Cytoplasmic	9.1	no	no
sr12363	chr02	743866	747585	1	no	0.152	1239	Membrane bound Mitochondrial	9.8	no	no
sr12364	chr02	747788	748031	-1	no	0.129	55	Extracellular (Secreted)	8.6	yes	yes
sr12365	chr02	748441	748794	1	no	0.103	117	Nuclear	5.5	no	no
sr12366	chr02	749398	749853	1	no	0.105	151	Mitochondrial	9.9	no	no
sr12367	chr02	750328	751149	-1	no	0.103	273	Plasma membrane	7	no	no
sr12368	chr02	751730	753415	-1	no	0.099	561	Membrane bound Mitochondrial	3.2	no	no
sr12369	chr02	755269	756347	1	no	0.112	330	Cytoplasmic	7.3	no	no
sr12370	chr02	756477	759089	-1	no	0.103	870	Nuclear	6.2	no	no
sr12371	chr02	759521	761428	1	no	0.107	635	Nuclear	6.7	no	no
sr12372	chr02	761487	768089	-1	no	0.14	2200	Cytoplasmic	5.5	no	no
sr12373	chr02	768537	769598	1	no	0.107	353	Cytoplasmic	2.8	no	no
sr12374	chr02	769745	771922	-1	no	0.107	725	Plasma membrane	3.4	no	no
sr12375	chr02	772972	773739	1	no	0.112	221	Nuclear	6	no	no
sr12376	chr02	775898	779936	1	no	0.1	1037	Nuclear	5.5	no	no
sr12377	chr02	780444	784341	-1	no	0.107	1266	Nuclear	5.5	no	no
sr12378	chr02	785723	787246	1	no	0.154	507	Cytoplasmic	9.8	no	no
sr12379	chr02	787857	789092	1	no	0.106	411	Membrane bound Mitochondrial	4.9	no	no
sr12380	chr02	789379	790401	-1	yes	0.677	340	Membrane bound Extracellular (Secreted)	9.2	yes	no
sr12381	chr02	791782	794748	1	no	0.105	988	Cytoplasmic	3.9	no	no
sr12382	chr02	794845	796455	-1	no	0.113	536	Plasma membrane	7.8	no	no
sr12383	chr02	796958	800887	1	no	0.11	1309	Membrane bound Endoplasmic reticulum	7.2	no	no
sr12384	chr02	801307	804699	1	no	0.104	1028	Cytoplasmic	4.7	no	no
sr12385	chr02	805066	807486	-1	no	0.123	806	Cytoplasmic	5.6	no	no
sr12386	chr02	808298	809467	-1	no	0.178	389	Mitochondrial	9.9	no	no
sr12387	chr02	810071	818347	1	no	0.108	2758	Nuclear	6	no	no
sr12388	chr02	818466	819722	-1	no	0.137	418	Membrane bound Peroxisomal	8.8	no	no
sr12389	chr02	820572	822911	-1	no	0.128	779	Nuclear	6.3	no	no
sr12390	chr02	823369	824787	1	no	0.104	472	Nuclear	6.7	no	no
sr12391	chr02	826954	831955	1	no	0.111	1519	Nuclear	6.9	no	no
sr12392	chr02	832432	833505	-1	no	0.105	332	Nuclear	3.5	no	no
sr12393	chr02	834379	835089	-1	no	0.226	189	Membrane bound Mitochondrial	10	no	no
sr12394	chr02	836489	837134	1	no	0.11	181	Membrane bound Mitochondrial	3.1	no	no
sr12395	chr02	837832	838866	1	no	0.11	344	Plasma membrane	3.4	no	no
sr12396	chr02	838987	840588	-1	no	0.185	533	Cytoplasmic	3.2	no	no
sr12397	chr02	841249	843600	-1	no	0.11	783	Nuclear	9.9	no	no
sr12398	chr02	844172	845609	1	no	0.192	338	Membrane bound Mitochondrial	9.8	no	no
sr12399	chr02	845874	846293	-1	no	0.102	139	Nuclear	6.5	no	no
sr12400	chr02	846688	847569	1	no	0.122	162	Nuclear	3.2	no	no
sr12401	chr02	848375	852337	1	no	0.183	1320	Cytoplasmic	3.1	no	no
sr12402	chr02	852988	854090	1	no	0.131	168	Mitochondrial	10	no	no
sr12403	chr02	854592	855449	-1	no	0.101	256	Mitochondrial	8.4	no	no
sr12404	chr02	856095	858362	1	no	0.107	755	Membrane bound Peroxisomal	9.9	no	no
sr12405	chr02	859067	862174	1	no	0.119	1035	Membrane bound Golgi	6.3	no	no
sr12406	chr02	862273	865887	-1	no	0.107	1204	Cytoplasmic	7.6	no	no
sr12407	chr02	866518	867633	1	no	0.112	319	Cytoplasmic	7.5	no	no
sr12408	chr02	867827	871027	-1	no	0.159	1066	Nuclear	4.4	no	no
sr12409	chr02	873269	881146	-1	no	0.201	2625	Membrane bound Mitochondrial	6.9	no	no
sr12410	chr02	881426	881745	1	no	0.104	62	Mitochondrial	6.9	no	no
sr12411	chr02	883154	884983	1	no	0.1	609	Plasma membrane	4.2	no	no
sr12412	chr02	885182	886156	-1	no	0.184	324	Membrane bound Mitochondrial	8	no	no
sr12413	chr02	886673	887992	1	no	0.106	439	Plasma membrane	3.1	no	no
sr12414	chr02	888146	888910	-1	no	0.121	254	Membrane bound Mitochondrial	5.9	no	no
sr12415	chr02	891259	893010	1	no	0.141	583	Nuclear	7.2	no	no
sr12416	chr02	893396	895120	1	no	0.289	574	Membrane bound Mitochondrial	9	no	no
sr12417	chr02	896639	898807	1	no	0.116	722	Nuclear	3.6	no	no
sr12418	chr02	898982	902953	-1	no	0.174	1323	Plasma membrane	4.8	no	no
sr12419	chr02	903900	905171	-1	no	0.168	423	Nuclear	4.8	no	no
sr12420	chr02	911106	911917	-1	no	0.113	209	Cytoplasmic	7.5	no	no
sr12421	chr02	912218	913927	-1	no	0.182	569	Membrane bound Mitochondrial	9.9	no	no
sr12422	chr02	914394	915473	1	no	0.251	330	Membrane bound Mitochondrial	8.6	no	no
sr12423	chr02	915963	918548	1	no	0.15	861	Cytoplasmic	3.6	no	no
sr12424	chr02	918653	923122	-1	no	0.158	1489	Plasma membrane	2.8	no	no
sr12425	chr02	923702	925846	-1	no	0.103	714	Nuclear	4.7	no	no
sr12426	chr02	928682	929161	1	no	0.153	132	Mitochondrial	9.9	no	no
sr12427	chr02	930120	931699	1	no	0.153	497	Plasma membrane	5	no	no
sr12428	chr02	932357	932938	1	yes	0.582	193	Membrane bound Extracellular (Secreted)	6.1	yes	yes
sr12429	chr02	933022	934341	-1	no	0.16	439	Nuclear	5.2	no	no
sr12430	chr02	935064	939230	1	no	0.246	1388	Cytoplasmic	3.4	no	no
sr12431	chr02	939346	940461	-1	yes	0.836	371	Membrane bound Mitochondrial	4.2	yes	yes
sr12432	chr02	941013	943658	-1	no	0.127	881	Membrane bound Mitochondrial	7.5	no	no
sr12433	chr02	946297	950169	-1	no	0.103	1290	Nuclear	9.9	no	no
sr12434	chr02	950743	953034	-1	no	0.11	763	Cytoplasmic	4.6	no	no
sr12435	chr02	953948	956047	1	no	0.112	699	Cytoplasmic	3.3	no	no
sr12436	chr02	956156	958282	-1	no	0.103	708	Membrane bound Endoplasmic reticulum	4.4	no	no
sr12437	chr02	958698	959672	1	no	0.098	267	Membrane bound Mitochondrial	5.4	no	no
sr12438	chr02	960037	961800	1	no	0.135	587	Plasma membrane	2.6	no	no
sr12439	chr02	962442	963893	1	no	0.109	483	Cytoplasmic	6.6	no	no
sr12440	chr02	964047	970709	-1	no	0.327	2220	Cytoplasmic	4.8	no	no
sr12441	chr02	971784	972818	1	no	0.146	344	Nuclear	4.8	no	no
sr12442	chr02	975341	976777	1	yes	0.658	478	Plasma membrane	3.1	yes	yes
sr12443	chr02	978105	979178	1	no	0.105	357	Mitochondrial	9.1	no	no
sr12444	chr02	979311	980399	-1	no	0.131	362	Nuclear	6.5	no	no
sr12445	chr02	984521	985945	1	no	0.107	474	Nuclear	6.3	no	no
sr12446	chr02	986359	987152	1	no	0.175	132	Membrane bound Mitochondrial	9.9	no	no
sr12447	chr02	987745	989528	-1	no	0.111	563	Membrane bound Vacuolar	8.3	no	no
sr12448	chr02	990677	994915	-1	no	0.105	1412	Cytoplasmic	7.4	no	no
sr12449	chr02	996227	998194	-1	yes	0.505	655	Membrane bound Extracellular (Secreted)	5.6	yes	yes
sr12450	chr02	1000051	1000528	1	no	0.119	66	Membrane bound Mitochondrial	8.4	no	no
sr12451	chr02	1000810	1002006	-1	no	0.154	235	Cytoplasmic	9.2	no	no
sr12452	chr02	1002259	1003960	-1	yes	0.615	436	Extracellular (Secreted)	3	yes	yes
sr12453	chr02	1004333	1007962	-1	no	0.101	1209	Plasma membrane	4.8	no	no
sr12454	chr02	1009184	1012375	1	no	0.15	1063	Nuclear	9.6	no	no
sr12455	chr02	1012501	1014459	-1	no	0.151	652	Nuclear	4.1	no	no
sr12456	chr02	1015244	1016569	1	no	0.248	441	Membrane bound Golgi	9.9	no	no
sr12457	chr02	1016681	1017916	-1	no	0.116	411	Membrane bound Mitochondrial	3.5	no	no
sr12458	chr02	1018338	1020896	-1	no	0.242	824	Plasma membrane	3.3	no	no
sr10231	chr02	1022995	1025658	1	no	0.115	887	Nuclear	4.8	no	no
sr10232	chr02	1026620	1028416	1	no	0.116	598	Plasma membrane	6.2	no	no
sr10233	chr02	1028469	1029626	-1	no	0.119	385	Membrane bound Endoplasmic reticulum	3	no	no
sr10234	chr02	1030287	1031252	1	no	0.151	321	Nuclear	4.7	no	no
sr10235	chr02	1031406	1039139	-1	no	0.105	2577	Membrane bound Endoplasmic reticulum	6.9	no	no
sr10245	chr02	1040739	1042506	1	no	0.13	557	Plasma membrane	5.6	no	no
sr10244	chr02	1043001	1044419	1	no	0.143	472	Membrane bound Mitochondrial	7.4	no	no
sr10243	chr02	1044544	1045770	-1	no	0.105	408	Plasma membrane	8.3	no	no
sr10242	chr02	1047377	1051279	1	no	0.118	1300	Plasma membrane	2.8	no	no
sr10241	chr02	1051361	1055305	-1	no	0.106	1314	Nuclear	3.5	no	no
sr10240	chr02	1056400	1062543	1	no	0.341	2047	Membrane bound Vacuolar	9.7	no	no
sr10239	chr02	1062748	1064883	-1	no	0.231	711	Membrane bound Mitochondrial	5.1	no	no
sr10238	chr02	1066324	1067595	1	no	0.213	423	Membrane bound Mitochondrial	8.8	no	no
sr10237	chr02	1067722	1068576	-1	no	0.101	284	Nuclear	7.7	no	no
sr10236	chr02	1068793	1070238	1	no	0.181	481	Cytoplasmic	3.2	no	no
sr10247	chr02	1071266	1076698	-1	no	0.107	1810	Nuclear	2.9	no	no
sr10248	chr02	1077749	1079710	-1	no	0.182	653	Membrane bound Mitochondrial	10	no	no
sr10249	chr02	1080524	1081627	1	no	0.218	367	Nuclear	3.4	no	no
sr10250	chr02	1081747	1085214	-1	no	0.101	1155	Nuclear	5.7	no	no
sr10251	chr02	1086120	1088213	1	no	0.117	697	Nuclear	5.9	no	no
sr10252	chr02	1088348	1089508	-1	no	0.102	386	Nuclear	6.3	no	no
sr10253	chr02	1089745	1091310	1	no	0.148	521	Mitochondrial	9.8	no	no
sr10254	chr02	1092031	1098849	1	no	0.148	2272	Membrane bound Endoplasmic reticulum	5.8	no	no
sr10255	chr02	1101865	1104288	1	no	0.103	807	Nuclear	6.4	no	no
sr10256	chr02	1105370	1106398	1	no	0.111	342	Cytoplasmic	6.1	no	no
sr10257	chr02	1107048	1108718	1	no	0.11	556	Plasma membrane	4.3	no	no
sr10258	chr02	1109697	1110050	1	no	0.223	117	Membrane bound Extracellular (Secreted)	9.4	no	no
sr10259	chr02	1111817	1113031	1	no	0.137	404	Membrane bound Mitochondrial	4.8	no	no
sr10260	chr02	1113535	1118088	-1	no	0.126	1517	Nuclear	9.9	no	no
sr10261	chr02	1119393	1120411	1	no	0.111	164	Nuclear	8.7	no	no
sr10262	chr02	1120590	1121194	-1	no	0.119	176	Cytoplasmic	8.2	no	no
sr10263	chr02	1122078	1123379	1	no	0.121	433	Plasma membrane	6.4	no	no
sr10264	chr02	1123555	1124262	-1	no	0.155	235	Membrane bound Mitochondrial	5.4	no	no
sr10265	chr02	1125177	1126796	-1	no	0.155	539	Cytoplasmic	4.9	no	no
sr10266	chr02	1127764	1128889	1	no	0.119	226	Cytoplasmic	7.5	no	no
sr10267	chr02	1129116	1131278	-1	no	0.124	720	Mitochondrial	9.3	no	no
sr10268	chr02	1131655	1133532	1	no	0.132	625	Membrane bound Mitochondrial	5.6	no	no
sr10269	chr02	1133610	1135961	-1	no	0.111	783	Nuclear	4.2	no	no
sr10270	chr02	1136924	1138217	1	no	0.444	400	Membrane bound Peroxisomal	2.5	no	no
sr10271	chr02	1138737	1140574	-1	no	0.191	590	Nuclear	3.8	no	no
sr10272	chr02	1142025	1144025	-1	no	0.158	666	Membrane bound Mitochondrial	9.9	no	no
sr10273	chr02	1144443	1147793	-1	no	0.136	1116	Cytoplasmic	3.9	no	no
sr10274	chr02	1148528	1149976	1	no	0.11	482	Cytoplasmic	3.2	no	no
sr10275	chr02	1150019	1150864	-1	no	0.183	281	Membrane bound Mitochondrial	3.4	no	no
sr10276	chr02	1151189	1152852	1	no	0.14	525	Membrane bound Mitochondrial	7.1	no	no
sr10277	chr02	1152937	1155108	-1	no	0.346	723	Nuclear	4.4	no	no
sr10278	chr02	1155739	1156887	-1	no	0.115	382	Cytoplasmic	6	no	no
sr10279	chr02	1158372	1159289	-1	yes	0.766	305	Extracellular (Secreted)	6.2	yes	yes
sr10280	chr02	1160879	1163773	-1	no	0.102	964	Plasma membrane	5.2	no	no
sr10281	chr02	1167400	1167696	-1	yes	0.833	98	Membrane bound Extracellular (Secreted)	7.7	yes	yes
sr10282	chr02	1169357	1172620	-1	no	0.137	1087	Nuclear	6	no	no
sr10283	chr02	1173310	1174575	1	no	0.116	421	Plasma membrane	4.3	no	no
sr10284	chr02	1175117	1175756	1	no	0.109	181	Nuclear	9.8	no	no
sr10285	chr02	1176318	1178643	-1	no	0.166	671	Membrane bound Mitochondrial	10	no	no
sr10286	chr02	1180241	1181266	-1	no	0.222	341	Mitochondrial	5	no	no
sr10287	chr02	1181763	1182878	1	no	0.141	371	Membrane bound Mitochondrial	8.9	no	no
sr10288	chr02	1183031	1185007	-1	no	0.174	658	Membrane bound Mitochondrial	9.9	no	no
sr10289	chr02	1186168	1187064	-1	yes	0.827	298	Membrane bound Extracellular (Secreted)	5.2	yes	yes
sr07278	chr02	1193720	1195252	-1	no	0.103	385	Nuclear	3.5	no	no
sr10290	chr02	1197777	1200338	-1	no	0.1	853	Cytoplasmic	4.9	no	no
sr10291	chr02	1201181	1203553	-1	no	0.172	790	Nuclear	5.1	no	no
sr10292	chr02	1204766	1205032	1	no	0.457	62	Extracellular (Secreted)	8.9	yes	yes
sr10293	chr02	1207648	1211166	1	no	0.123	1172	Nuclear	9.5	no	no
sr10294	chr02	1212052	1213816	1	no	0.114	551	Nuclear	9.9	no	no
sr10295	chr02	1216293	1220492	1	no	0.118	1399	Cytoplasmic	4.7	no	no
sr10296	chr02	1221052	1222398	-1	no	0.135	448	Cytoplasmic	5.9	no	no
sr10297	chr02	1223907	1226783	1	no	0.1	958	Membrane bound Endoplasmic reticulum	7.1	no	no
sr10298	chr02	1226834	1229758	-1	no	0.101	974	Plasma membrane	2.6	no	no
sr10299	chr02	1231187	1232554	1	no	0.12	455	Nuclear	9.7	no	no
sr10300	chr02	1232720	1234816	-1	no	0.183	698	Membrane bound Mitochondrial	9.2	no	no
sr10301	chr02	1236231	1238645	1	no	0.111	804	Nuclear	7.9	no	no
sr10302	chr02	1239290	1241299	1	no	0.102	669	Cytoplasmic	9.9	no	no
sr10303	chr02	1241652	1246604	-1	no	0.115	1650	Membrane bound Vacuolar	6	no	no
sr10304	chr02	1247554	1253190	1	no	0.173	1878	Membrane bound Endoplasmic reticulum	8.4	no	no
sr10305	chr02	1253809	1255194	1	no	0.234	461	Membrane bound Mitochondrial	5	no	no
sr10306	chr02	1255452	1257101	-1	no	0.102	549	Cytoplasmic	10	no	no
sr10307	chr02	1258135	1259613	-1	no	0.146	492	Membrane bound Peroxisomal	9.6	no	no
sr10308	chr02	1260650	1261960	1	yes	0.498	436	Membrane bound Mitochondrial	6.8	yes	yes
sr10309	chr02	1262136	1263830	-1	yes	0.817	564	Plasma membrane	7.4	yes	yes
sr10310	chr02	1264852	1266552	-1	yes	0.771	566	Golgi	5.4	yes	yes
sr10311	chr02	1267076	1268926	-1	yes	0.847	616	Membrane bound Endoplasmic reticulum	5.5	yes	yes
sr10312	chr02	1269469	1271427	-1	yes	0.863	652	Membrane bound Mitochondrial	2.4	yes	yes
sr10313	chr02	1272065	1273069	-1	yes	0.761	334	Membrane bound Mitochondrial	2.1	yes	yes
sr10314	chr02	1274229	1274915	-1	yes	0.741	228	Nuclear	3.1	yes	yes
sr10315	chr02	1277580	1278584	-1	yes	0.863	334	Membrane bound Golgi	8	yes	no
sr10316	chr02	1279189	1280130	-1	yes	0.616	313	Extracellular (Secreted)	2.7	yes	yes
sr10317	chr02	1280737	1282022	-1	yes	0.768	340	Membrane bound Mitochondrial	4.5	yes	yes
sr10318	chr02	1282704	1283310	-1	yes	0.851	172	Plasma membrane	8.3	yes	no
sr10319	chr02	1283823	1286053	-1	no	0.185	707	Membrane bound Mitochondrial	8.6	no	no
sr10320	chr02	1286455	1287503	1	no	0.127	281	Cytoplasmic	10	no	no
sr10321	chr02	1288245	1290158	1	yes	0.675	637	Plasma membrane	5	yes	yes
sr10322	chr02	1290315	1291454	-1	no	0.102	379	Cytoplasmic	9.9	no	no
sr10323	chr02	1292010	1293063	1	no	0.131	323	Membrane bound Golgi	5.2	no	no
sr10324	chr02	1293268	1294329	-1	no	0.156	353	Membrane bound Mitochondrial	6.5	no	no
sr10325	chr02	1294721	1295494	1	no	0.122	113	Plasma membrane	3	no	no
sr10326	chr02	1296250	1297908	-1	no	0.107	552	Membrane bound Mitochondrial	8.3	no	no
sr10327	chr02	1298787	1300526	-1	no	0.101	579	Nuclear	4.6	no	no
sr10328	chr02	1301415	1303523	-1	no	0.136	702	Nuclear	10	no	no
sr10329	chr02	1305698	1309460	1	no	0.103	1185	Nuclear	7	no	no
sr02685	chr02	1310421	1310888	1	no	0.108	155	Membrane bound Extracellular (Secreted)	6.3	no	no
sr10330	chr02	1316237	1318165	1	no	0.1	642	Nuclear	6.5	no	no
sr10331	chr02	1318621	1319109	1	no	0.103	77	Extracellular (Secreted)	8.4	yes	yes
sr10332	chr02	1319323	1320836	-1	no	0.201	478	Membrane bound Mitochondrial	6.1	no	no
sr10333	chr02	1321239	1323884	-1	no	0.195	881	Mitochondrial	8.2	no	no
sr10334	chr02	1324468	1325457	-1	no	0.164	329	Membrane bound Mitochondrial	5.7	no	no
sr10335	chr02	1326637	1328763	-1	no	0.11	708	Plasma membrane	4.7	no	no
sr10336	chr02	1332162	1333961	1	no	0.133	599	Cytoplasmic	2.9	no	no
sr10337	chr02	1334148	1336715	1	no	0.1	855	Nuclear	4.2	no	no
sr10338	chr02	1336928	1338064	-1	no	0.113	378	Nuclear	9.5	no	no
sr10339	chr02	1338361	1341843	1	no	0.134	1160	Cytoplasmic	9.4	no	no
sr10340	chr02	1341950	1344109	-1	no	0.126	714	Membrane bound Mitochondrial	7.6	no	no
sr10341	chr02	1346363	1353325	1	no	0.105	2320	Membrane bound Endoplasmic reticulum	3.9	no	no
sr10342	chr02	1353502	1354347	-1	no	0.106	281	Mitochondrial	7.6	no	no
sr10343	chr02	1354530	1356425	1	no	0.108	631	Membrane bound Mitochondrial	6.1	no	no
sr10344	chr02	1356518	1358020	-1	no	0.105	500	Nuclear	3	no	no
sr10345	chr02	1358860	1361876	1	no	0.101	889	Nuclear	5.6	no	no
sr10346	chr02	1362120	1362618	-1	no	0.098	141	Membrane bound Mitochondrial	5.3	no	no
sr10347	chr02	1363059	1364435	-1	no	0.23	458	Membrane bound Mitochondrial	3.2	no	no
sr10389	chr02	1365511	1367487	-1	no	0.104	658	Cytoplasmic	9.7	no	no
sr10390	chr02	1369377	1372283	1	no	0.1	968	Nuclear	6.9	no	no
sr10391	chr02	1372671	1373290	-1	no	0.102	117	Cytoplasmic	6.6	no	no
sr10393	chr02	1373592	1375877	-1	no	0.1	761	Nuclear	6.4	no	no
sr10394	chr02	1376988	1380341	1	no	0.115	1117	Nuclear	2.3	no	no
sr10395	chr02	1380407	1381153	-1	no	0.109	222	Cytoplasmic	9.5	no	no
sr10397	chr02	1381793	1382320	1	no	0.1	175	Cytoplasmic	7.6	no	no
sr10398	chr02	1382682	1383347	-1	no	0.148	192	Mitochondrial	9.8	no	no
sr10400.2	chr02	1384136	1387711	-1	no	0.12	1191	Nuclear	9.5	no	no
sr10401	chr02	1390943	1392619	1	no	0.117	558	Cytoplasmic	10	no	no
sr10403	chr02	1392871	1393242	-1	no	0.11	82	Nuclear	7.8	no	no
sr10404	chr02	1394117	1396096	1	no	0.185	659	Plasma membrane	7.8	no	no
sr10405	chr02	1397544	1406682	1	no	0.117	3020	Membrane bound Mitochondrial	4.2	no	no
sr10407.2	chr02	1407382	1408509	1	no	0.102	167	Cytoplasmic	9.8	no	no
sr10408	chr02	1409358	1411982	1	no	0.112	874	Membrane bound Mitochondrial	6.8	no	no
sr10409.2	chr02	1412038	1412925	-1	no	0.113	191	Mitochondrial	7.5	no	no
sr10411.2	chr02	1412993	1415296	1	no	0.147	767	Membrane bound Mitochondrial	9.5	no	no
sr10412	chr02	1417150	1419996	1	no	0.111	948	Extracellular (Secreted)	3.4	yes	no
sr10414	chr02	1420105	1422585	-1	no	0.101	826	Nuclear	5.5	no	no
sr10416	chr02	1423842	1427738	-1	yes	0.728	1298	Plasma membrane	7.6	yes	yes
sr10419.2	chr02	1429132	1429981	1	no	0.134	190	Cytoplasmic	5.7	no	no
sr10420.2	chr02	1431494	1434706	1	no	0.109	1070	Nuclear	5.9	no	no
sr10421.2	chr02	1435460	1436340	1	no	0.132	262	Mitochondrial	6	no	no
sr10422	chr02	1436581	1437330	-1	no	0.105	249	Nuclear	6.7	no	no
sr10423	chr02	1438314	1440584	-1	no	0.105	756	Cytoplasmic	5.2	no	no
sr10425	chr02	1440936	1441910	-1	no	0.1	127	Mitochondrial	9.2	no	no
sr10427.2	chr02	1443552	1445513	1	yes	0.502	653	Nuclear	5.2	yes	yes
sr10428.2	chr02	1445914	1448791	1	no	0.116	878	Nuclear	9.9	no	no
sr10429.2	chr02	1448984	1449493	-1	yes	0.899	169	Membrane bound Extracellular (Secreted)	8.6	yes	no
sr10430.2	chr02	1450413	1450880	-1	no	0.128	130	Golgi	3.2	no	no
sr10431.2	chr02	1451399	1451970	1	yes	0.7	162	Extracellular (Secreted)	9.2	yes	yes
sr10432.2	chr02	1452994	1453529	1	yes	0.779	143	Extracellular (Secreted)	9.2	yes	yes
sr20001	chr02	1454221	1454754	1	yes	0.854	142	Extracellular (Secreted)	6.7	yes	yes
sr10433	chr02	1455964	1456518	1	yes	0.864	154	Extracellular (Secreted)	6.7	yes	yes
sr10434	chr02	1456752	1459043	-1	no	0.105	763	Nuclear	6.8	no	no
sr10436.2	chr02	1459579	1461300	1	no	0.143	573	Cytoplasmic	4.3	no	no
sr10437	chr02	1461367	1463229	-1	no	0.251	620	Nuclear	5.1	no	no
sr10438	chr02	1463810	1466773	1	no	0.148	987	Nuclear	2.8	no	no
sr10440	chr02	1466945	1468153	-1	no	0.133	402	Membrane bound Mitochondrial	4.6	no	no
sr10442	chr02	1468441	1470300	1	no	0.125	619	Nuclear	4.8	no	no
sr10443	chr02	1470367	1471980	-1	no	0.112	537	Membrane bound Mitochondrial	7.4	no	no
sr10445	chr02	1472389	1475519	-1	no	0.103	959	Nuclear	6.8	no	no
sr10446.2	chr02	1476063	1476796	1	no	0.103	125	Membrane bound Mitochondrial	9.9	no	no
sr10448	chr02	1477872	1481816	1	no	0.103	1314	Plasma membrane	4.2	no	no
sr10450.2	chr02	1481958	1482782	-1	no	0.109	274	Nuclear	5.6	no	no
sr10451	chr02	1483087	1484799	-1	no	0.153	570	Membrane bound Mitochondrial	10	no	no
sr10452	chr02	1486528	1487445	1	no	0.095	305	Cytoplasmic	10	no	no
sr10453	chr02	1487773	1488760	-1	no	0.105	298	Nuclear	5.5	no	no
sr10454	chr02	1489673	1491020	-1	no	0.101	159	Cytoplasmic	10	no	no
sr10455	chr02	1491913	1492350	1	no	0.101	145	Cytoplasmic	10	no	no
sr10456	chr02	1493064	1493847	-1	no	0.128	204	Nuclear	2.9	no	no
sr10459	chr02	1495055	1497010	1	no	0.105	651	Membrane bound Endoplasmic reticulum	8.8	no	no
sr10460	chr02	1497236	1498981	-1	no	0.105	581	Cytoplasmic	10	no	no
sr10461.2	chr02	1499756	1502083	1	no	0.176	775	Cytoplasmic	9.7	no	no
sr10462.2	chr02	1502672	1503748	1	no	0.142	358	Nuclear	4	no	no
sr10464.2	chr02	1504219	1505902	-1	no	0.141	192	Mitochondrial	5.7	no	no
sr10465	chr02	1506809	1507828	1	no	0.103	339	Nuclear	10	no	no
sr10467	chr02	1508525	1510693	-1	no	0.118	722	Membrane bound Peroxisomal	8.7	no	no
sr10469	chr02	1514166	1515329	1	no	0.132	387	Membrane bound Mitochondrial	9.9	no	no
sr10470	chr02	1516663	1520547	1	no	0.109	1294	Nuclear	3.5	no	no
sr10471	chr02	1520660	1521757	-1	no	0.108	365	Nuclear	4.2	no	no
sr10473	chr02	1522432	1523070	1	no	0.114	212	Nuclear	6.9	no	no
sr10474	chr02	1523532	1524914	1	yes	0.905	460	Nuclear	2.6	yes	yes
sr10475	chr02	1525032	1526375	-1	no	0.188	447	Membrane bound Mitochondrial	9.9	no	no
sr10477	chr02	1527284	1527898	-1	no	0.384	204	Plasma membrane	5	no	no
sr10478	chr02	1528167	1529762	1	no	0.115	531	Nuclear	6.7	no	no
sr10480.2	chr02	1535134	1535741	1	no	0.11	162	Membrane bound Mitochondrial	9.5	no	no
sr10481	chr02	1536418	1538745	-1	no	0.105	775	Nuclear	6.3	no	no
sr10482	chr02	1539099	1540466	1	no	0.113	455	Cytoplasmic	3.9	no	no
sr10483	chr02	1541121	1541672	-1	no	0.105	155	Cytoplasmic	4	no	no
sr10485	chr02	1542497	1544485	1	no	0.103	629	Cytoplasmic	9.9	no	no
sr10487.2	chr02	1544757	1545623	-1	no	0.109	288	Membrane bound Mitochondrial	4.1	no	no
sr10488	chr02	1546255	1547640	1	no	0.099	461	Cytoplasmic	9.6	no	no
sr10489	chr02	1547744	1549252	-1	no	0.127	502	Membrane bound Mitochondrial	10	no	no
sr10491.2	chr02	1549922	1550896	1	no	0.108	324	Membrane bound Mitochondrial	7.4	no	no
sr10492.2	chr02	1549922	1551865	1	no	0.245	298	Membrane bound Mitochondrial	8.5	no	no
sr10493	chr02	1552097	1552717	-1	no	0.105	178	Cytoplasmic	10	no	no
sr10494	chr02	1553214	1553546	1	no	0.114	110	Nuclear	5.7	no	no
sr10495	chr02	1553814	1555763	-1	no	0.107	649	Cytoplasmic	4	no	no
sr10497.2	chr02	1557811	1560510	1	no	0.104	899	Cytoplasmic	3.4	no	no
sr10499.2	chr02	1560762	1562738	-1	no	0.132	658	Mitochondrial	3.2	no	no
sr10500.2	chr02	1563769	1564548	1	no	0.131	259	Nuclear	6	no	no
sr10502	chr02	1565635	1568433	-1	no	0.141	932	Nuclear	3.9	no	no
sr10504	chr02	1569084	1570841	1	no	0.098	585	Nuclear	9.8	no	no
sr10505	chr02	1570998	1571963	-1	no	0.135	321	Membrane bound Mitochondrial	7.6	no	no
sr10506.2	chr02	1572260	1573225	1	no	0.141	321	Mitochondrial	6.9	no	no
sr20002	chr02	1573425	1574480	1	no	0.104	351	Nuclear	7	no	no
sr10507	chr02	1574730	1575995	-1	no	0.111	421	Cytoplasmic	9.8	no	no
sr10509	chr02	1576448	1576948	1	no	0.132	141	Mitochondrial	6	no	no
sr10510	chr02	1577099	1577506	-1	no	0.164	135	Membrane bound Mitochondrial	9.5	no	no
sr10511	chr02	1577802	1579517	1	yes	0.482	571	Membrane bound Mitochondrial	9.5	yes	no
sr10513.2	chr02	1579591	1583136	-1	no	0.138	1181	Membrane bound Golgi	4.3	no	no
sr10515	chr02	1586612	1589113	1	no	0.139	833	Nuclear	6.1	no	no
sr10516	chr02	1589553	1590623	-1	no	0.106	356	Nuclear	6.7	no	no
sr10517	chr02	1591889	1592542	1	no	0.115	217	Nuclear	9.4	no	no
sr10518	chr02	1595159	1596267	1	no	0.102	261	Cytoplasmic	10	no	no
sr10520	chr02	1597596	1600559	1	no	0.121	987	Cytoplasmic	3.1	no	no
sr10521.2	chr02	1601079	1602024	1	no	0.133	180	Cytoplasmic	5.3	no	no
sr10522	chr02	1602382	1603353	-1	no	0.135	323	Membrane bound Mitochondrial	7	no	no
sr10524	chr02	1605343	1605851	1	no	0.149	141	Mitochondrial	9.4	no	no
sr10525.2	chr02	1605947	1608424	-1	no	0.104	825	Plasma membrane	3.3	no	no
sr10526	chr02	1609094	1611121	1	no	0.106	675	Nuclear	7.9	no	no
sr10527.2	chr02	1611501	1612793	1	no	0.179	430	Membrane bound Endoplasmic reticulum	3.3	no	no
sr10528	chr02	1613110	1614381	-1	no	0.129	423	Plasma membrane	7.2	no	no
sr10529	chr02	1616680	1617115	1	yes	0.881	117	Mitochondrial	4.4	yes	yes
sr10531	chr02	1617277	1619121	-1	no	0.103	614	Membrane bound Mitochondrial	8.3	no	no
sr10532	chr02	1620532	1622442	1	yes	0.811	636	Extracellular (Secreted)	7.7	yes	yes
sr10533	chr02	1624282	1624608	-1	no	0.162	108	Nuclear	8.3	no	no
sr10534	chr02	1630077	1634372	1	no	0.105	1431	Membrane bound Mitochondrial	2.9	no	no
sr10535	chr02	1634853	1635791	1	no	0.196	312	Membrane bound Mitochondrial	8.7	no	no
sr10537	chr02	1636049	1636975	-1	yes	0.477	308	Membrane bound Endoplasmic reticulum	6.1	yes	yes
sr10538	chr02	1637481	1639328	1	no	0.105	615	Nuclear	6.6	no	no
sr10541	chr02	1641365	1644735	1	no	0.108	1123	Nuclear	6.5	no	no
sr10542	chr02	1644919	1648872	-1	no	0.103	1317	Cytoplasmic	3.8	no	no
sr10545	chr02	1649345	1650014	-1	no	0.105	152	Cytoplasmic	9.9	no	no
sr10546.2	chr02	1650898	1652067	1	no	0.102	341	Membrane bound Golgi	9.9	no	no
sr10547	chr02	1652741	1653925	-1	no	0.207	394	Plasma membrane	4.1	no	no
sr12459	chr02	1655610	1657037	1	no	0.132	442	Nuclear	3.7	no	no
sr12460	chr02	1659601	1661297	1	no	0.108	519	Nuclear	8.5	no	no
sr12461	chr02	1661971	1663533	-1	no	0.108	372	Membrane bound Extracellular (Secreted)	3.1	no	no
sr12462	chr02	1665690	1668032	-1	no	0.121	780	Membrane bound Extracellular (Secreted)	3.1	no	no
sr12463	chr02	1669327	1670481	-1	no	0.132	384	Membrane bound Mitochondrial	7.9	no	no
sr12464	chr02	1671617	1672741	1	no	0.118	374	Nuclear	9.9	no	no
sr12465	chr02	1673247	1674196	-1	no	0.158	260	Nuclear	7.9	no	no
sr12466	chr02	1675509	1677626	1	no	0.107	705	Nuclear	6.6	no	no
sr12467	chr02	1678089	1681712	-1	no	0.101	1207	Cytoplasmic	4.3	no	no
sr12468	chr02	1683533	1686052	1	no	0.107	839	Plasma membrane	3.1	no	no
sr12469	chr02	1686477	1687324	1	no	0.122	257	Cytoplasmic	2.9	no	no
sr12470	chr02	1687631	1689013	-1	no	0.125	460	Cytoplasmic	4.2	no	no
sr12471	chr02	1689336	1690364	1	no	0.154	342	Nuclear	4.1	no	no
sr12472	chr02	1690460	1691317	-1	no	0.115	285	Cytoplasmic	3.4	no	no
sr12473	chr02	1691995	1694565	1	no	0.125	856	Cytoplasmic	3.9	no	no
sr12474	chr02	1695304	1696443	1	no	0.179	379	Plasma membrane	4.5	no	no
sr12475	chr02	1696639	1698264	-1	no	0.301	541	Membrane bound Endoplasmic reticulum	3.2	no	no
sr12476	chr02	1698887	1700098	-1	no	0.095	403	Nuclear	4.7	no	no
sr12477	chr02	1700519	1700938	1	no	0.177	107	Mitochondrial	5.1	no	no
sr12478	chr02	1706024	1708438	1	no	0.117	804	Nuclear	5.1	no	no
sr12479	chr02	1709216	1710806	1	no	0.152	507	Membrane bound Mitochondrial	9.3	no	no
sr12480	chr02	1710917	1713484	-1	no	0.099	855	Membrane bound Golgi	8.8	no	no
sr12481	chr02	1714944	1716512	1	no	0.132	522	Cytoplasmic	3.7	no	no
sr12482	chr02	1716684	1717727	-1	no	0.162	347	Membrane bound Mitochondrial	3.1	no	no
sr12483	chr02	1718016	1719278	1	no	0.121	420	Membrane bound Extracellular (Secreted)	3	no	no
sr12484	chr02	1719284	1720933	-1	no	0.113	549	Nuclear	4.1	no	no
sr12485	chr02	1721179	1722507	-1	no	0.126	442	Nuclear	8.7	no	no
sr12486	chr02	1722825	1723805	1	no	0.099	326	Nuclear	5.9	no	no
sr12487	chr02	1723914	1724789	-1	no	0.106	291	Nuclear	6	no	no
sr12488	chr02	1725802	1727151	1	no	0.106	449	Nuclear	6.2	no	no
sr12489	chr02	1728265	1729290	1	yes	0.863	341	Membrane bound Mitochondrial	7.4	yes	yes
sr12490	chr02	1729439	1731087	-1	no	0.147	433	Cytoplasmic	3.8	no	no
sr12491	chr02	1731612	1733210	-1	no	0.404	532	Membrane bound Mitochondrial	3.5	no	no
sr12492	chr02	1734130	1735550	1	no	0.1	450	Peroxisomal	5.9	no	no
sr12493	chr02	1735652	1736415	-1	no	0.102	201	Membrane bound Extracellular (Secreted)	4.6	no	no
sr12494	chr02	1737360	1738439	-1	no	0.163	359	Membrane bound Peroxisomal	3	no	no
sr12495	chr02	1739173	1741773	-1	no	0.111	866	Plasma membrane	6.4	no	no
sr12496	chr02	1746674	1748410	1	no	0.123	578	Plasma membrane	6.1	no	no
sr12497	chr02	1748589	1750115	-1	no	0.239	508	Plasma membrane	3.6	no	no
sr12498	chr02	1750657	1751996	-1	no	0.125	397	Cytoplasmic	3.1	no	no
sr12499	chr02	1752864	1754937	-1	no	0.106	665	Membrane bound Mitochondrial	2.6	no	no
sr12500	chr02	1756382	1760341	-1	yes	0.544	1319	Plasma membrane	8.8	yes	no
sr12501	chr02	1762340	1763326	1	no	0.115	274	Mitochondrial	9.2	no	no
sr12502	chr02	1763565	1764933	-1	no	0.114	427	Cytoplasmic	3.1	no	no
sr12503	chr02	1766153	1780839	1	no	0.11	4861	Membrane bound Mitochondrial	5.2	no	no
sr12504	chr02	1781910	1783259	1	no	0.133	449	Plasma membrane	8.3	no	no
sr12505	chr02	1784537	1786322	1	no	0.138	533	Membrane bound Mitochondrial	4	no	no
sr12506	chr02	1788779	1790585	1	no	0.104	567	Cytoplasmic	4.1	no	no
sr12507	chr03	958	3318	-1	no	0.131	786	Cytoplasmic	3.1	no	no
sr12508	chr03	3719	4840	1	no	0.135	373	Cytoplasmic	10	no	no
sr12509	chr03	5108	8069	-1	no	0.106	961	Nuclear	9.9	no	no
sr12510	chr03	8693	9693	1	no	0.123	302	Mitochondrial	3.4	no	no
sr12511	chr03	9819	14531	-1	no	0.113	1570	Plasma membrane	3.1	no	no
sr12512	chr03	15962	17131	1	no	0.11	389	Mitochondrial	9.3	no	no
sr12513	chr03	17321	20362	-1	no	0.157	980	Membrane bound Mitochondrial	8.8	no	no
sr12514	chr03	21275	21701	1	no	0.101	82	Cytoplasmic	4.3	no	no
sr12515	chr03	21832	23245	-1	no	0.114	443	Nuclear	5.7	no	no
sr12516	chr03	23677	25980	1	no	0.164	767	Nuclear	6.1	no	no
sr12517	chr03	26088	29918	-1	no	0.103	1276	Cytoplasmic	5.4	no	no
sr12518	chr03	30373	31962	1	no	0.109	529	Cytoplasmic	3.8	no	no
sr12519	chr03	33830	36340	1	no	0.14	836	Nuclear	4.5	no	no
sr12520	chr03	36570	39167	-1	no	0.117	865	Nuclear	6.2	no	no
sr12521	chr03	41444	44617	1	no	0.104	1057	Nuclear	10	no	no
sr12522	chr03	44758	46332	-1	no	0.133	524	Membrane bound Peroxisomal	9.5	no	no
sr12523	chr03	46656	49185	-1	no	0.122	706	Mitochondrial	8.8	no	no
sr12524	chr03	51199	53799	1	no	0.102	866	Cytoplasmic	9.5	no	no
sr12525	chr03	54510	55772	1	no	0.107	420	Membrane bound Mitochondrial	5.1	no	no
sr12526	chr03	56118	57014	1	no	0.101	298	Cytoplasmic	8.2	no	no
sr12527	chr03	57366	61379	1	no	0.116	1337	Plasma membrane	4.7	no	no
sr12528	chr03	61421	63826	-1	no	0.1	801	Membrane bound Mitochondrial	3.1	no	no
sr12529	chr03	67448	69028	1	no	0.105	526	Membrane bound Peroxisomal	6.6	no	no
sr12530	chr03	69146	71146	-1	no	0.113	666	Nuclear	9.9	no	no
sr12531	chr03	71780	72775	1	no	0.103	331	Cytoplasmic	7.3	no	no
sr12532	chr03	72865	77328	-1	no	0.109	1487	Membrane bound Vacuolar	9.4	no	no
sr12533	chr03	77864	80500	1	no	0.11	878	Nuclear	9.6	no	no
sr12534	chr03	80690	81117	-1	no	0.217	106	Mitochondrial	7.8	no	no
sr12535	chr03	81364	83205	1	no	0.17	613	Membrane bound Mitochondrial	4	no	no
sr12536	chr03	83274	85187	-1	no	0.145	637	Cytoplasmic	7.2	no	no
sr12537	chr03	85963	88815	1	no	0.106	950	Cytoplasmic	5.7	no	no
sr12538	chr03	89239	90338	-1	yes	0.866	340	Extracellular (Secreted)	9.5	yes	yes
sr12539	chr03	91603	93285	-1	no	0.418	560	Cytoplasmic	2.8	no	no
sr12540	chr03	93599	96779	-1	no	0.117	1033	Membrane bound Mitochondrial	9.2	no	no
sr12541	chr03	97490	98778	1	no	0.106	365	Nuclear	6.1	no	no
sr12542	chr03	98923	100659	-1	no	0.117	578	Plasma membrane	8.4	no	no
sr12543	chr03	102857	105121	-1	no	0.129	754	Membrane bound Mitochondrial	4.9	no	no
sr12544	chr03	105437	106681	-1	no	0.105	414	Nuclear	9.3	no	no
sr12545	chr03	107060	108232	-1	no	0.123	390	Membrane bound Endoplasmic reticulum	6.5	no	no
sr12546	chr03	109582	110922	1	no	0.129	446	Membrane bound Mitochondrial	9.8	no	no
sr12547	chr03	111390	113189	-1	no	0.122	599	Cytoplasmic	9.1	no	no
sr12548	chr03	114415	115443	1	yes	0.533	342	Membrane bound Mitochondrial	9.9	yes	no
sr12549	chr03	115913	117979	-1	no	0.322	688	Membrane bound Endoplasmic reticulum	6.6	no	no
sr12574	chr03	119792	134450	-1	no	0.1	4187	Cytoplasmic	3.7	no	no
sr12573	chr03	136980	137342	1	no	0.13	120	Plasma membrane	3.7	no	no
sr12572	chr03	137514	139199	-1	no	0.192	561	Membrane bound Mitochondrial	9.9	no	no
sr12571	chr03	139850	141727	1	no	0.153	534	Membrane bound Mitochondrial	4	no	no
sr12570	chr03	141798	142979	-1	no	0.142	393	Membrane bound Mitochondrial	2.4	no	no
sr12569	chr03	143353	143835	1	no	0.186	113	Nuclear	4.9	no	no
sr12568	chr03	143993	146416	-1	no	0.143	807	Nuclear	6.5	no	no
sr12567	chr03	146839	147707	-1	no	0.109	240	Golgi	8.7	no	no
sr12566	chr03	148012	151173	1	no	0.113	1053	Cytoplasmic	6	no	no
sr12565	chr03	151245	154610	-1	no	0.114	1121	Nuclear	9.9	no	no
sr12564	chr03	155085	155743	1	no	0.098	158	Nuclear	5.7	no	no
sr12563	chr03	156088	159303	-1	no	0.109	1017	Nuclear	3.5	no	no
sr12562	chr03	163384	165036	-1	no	0.157	430	Cytoplasmic	5.5	no	no
sr12561	chr03	165667	168033	1	no	0.112	788	Membrane bound Mitochondrial	3.9	no	no
sr12560	chr03	168393	169994	-1	no	0.112	533	Plasma membrane	9.9	no	no
sr12559	chr03	172018	172722	1	no	0.41	234	Mitochondrial	7.5	no	no
sr12558	chr03	173602	174215	-1	no	0.102	61	Cytoplasmic	9.8	no	no
sr12557	chr03	175347	177176	1	yes	0.769	609	Plasma membrane	5.9	yes	yes
sr12556	chr03	177348	181700	-1	no	0.123	1232	Cytoplasmic	4.8	no	no
sr12555	chr03	183055	186096	-1	no	0.113	1013	Cytoplasmic	3.6	no	no
sr12554	chr03	186356	186932	1	no	0.125	161	Cytoplasmic	8.1	no	no
sr12553	chr03	187555	188059	-1	no	0.104	136	Nuclear	9.9	no	no
sr12552	chr03	189400	189828	1	no	0.106	142	Nuclear	10	no	no
sr12551	chr03	190368	191274	-1	no	0.102	222	Cytoplasmic	4.4	no	no
sr12550	chr03	193864	197211	1	no	0.103	1115	Cytoplasmic	4.5	no	no
sr12575	chr03	198527	199600	1	no	0.105	357	Plasma membrane	9.9	no	no
sr12576	chr03	200008	200675	1	no	0.203	202	Extracellular (Secreted)	7	yes	no
sr12577	chr03	200840	203512	-1	no	0.117	890	Membrane bound Mitochondrial	6.6	no	no
sr12578	chr03	204021	205391	-1	no	0.102	456	Cytoplasmic	4.1	no	no
sr12579	chr03	206427	207914	-1	no	0.11	495	Mitochondrial	7.5	no	no
sr12580	chr03	208674	211274	1	no	0.123	866	Nuclear	7.4	no	no
sr12581	chr03	211406	216400	-1	yes	0.905	1664	Plasma membrane	7.8	yes	yes
sr12582	chr03	217055	219469	-1	yes	0.638	804	Membrane bound Extracellular (Secreted)	9.7	yes	no
sr12583	chr03	223515	224840	1	no	0.125	441	Cytoplasmic	8.5	no	no
sr12584	chr03	225310	226260	1	no	0.108	316	Cytoplasmic	9.5	no	no
sr12585	chr03	228335	232681	1	no	0.135	1448	Cytoplasmic	6.5	no	no
sr12586	chr03	233770	235376	1	no	0.182	477	Membrane bound Mitochondrial	10	no	no
sr12587	chr03	237217	241824	1	no	0.105	1535	Membrane bound Endoplasmic reticulum	6.5	no	no
sr12588	chr03	243467	248320	1	no	0.102	1617	Nuclear	4	no	no
sr12589	chr03	248902	250049	-1	no	0.172	358	Nuclear	4.3	no	no
sr12590	chr03	252802	253968	-1	no	0.119	388	Cytoplasmic	4	no	no
sr12591	chr03	254348	255165	-1	no	0.176	242	Membrane bound Mitochondrial	8.9	no	no
sr12592	chr03	256068	257354	-1	no	0.099	355	Membrane bound Extracellular (Secreted)	7.3	no	no
sr12593	chr03	258413	258676	1	no	0.119	87	Nuclear	8.9	no	no
sr12594	chr03	259331	260673	1	no	0.114	230	Nuclear	3.5	no	no
sr12595	chr03	259331	260746	1	no	0.114	471	Cytoplasmic	2.8	no	no
sr12596	chr03	261363	264260	1	no	0.131	965	Nuclear	3.8	no	no
sr12597	chr03	264427	265614	-1	no	0.101	395	Membrane bound Mitochondrial	6.7	no	no
sr12598	chr03	265963	268158	-1	no	0.136	731	Nuclear	6.1	no	no
sr12599	chr03	268454	269297	1	no	0.104	173	Cytoplasmic	8.9	no	no
sr12600	chr03	269414	271402	-1	no	0.112	662	Nuclear	6	no	no
sr12601	chr03	272001	275354	1	no	0.214	1117	Membrane bound Mitochondrial	3.4	no	no
sr12602	chr03	275476	277104	-1	no	0.114	542	Cytoplasmic	9.9	no	no
sr12603	chr03	277840	279454	1	no	0.186	448	Plasma membrane	6.3	no	no
sr12604	chr03	279534	280685	-1	no	0.108	383	Nuclear	4	no	no
sr12605	chr03	282580	284536	1	no	0.116	586	Plasma membrane	6.7	no	no
sr12606	chr03	285002	285820	-1	no	0.107	272	Membrane bound Golgi	4.1	no	no
sr12607	chr03	287008	288177	1	no	0.108	389	Nuclear	3.8	no	no
sr12608	chr03	288590	295750	-1	no	0.112	2386	Nuclear	9.5	no	no
sr12609	chr03	296456	297140	1	no	0.105	131	Nuclear	4.5	no	no
sr12610	chr03	297429	297734	-1	no	0.1	101	Cytoplasmic	6.3	no	no
sr12611	chr03	298165	299658	1	no	0.099	497	Nuclear	6.2	no	no
sr12612	chr03	299749	301680	-1	no	0.119	643	Plasma membrane	3.6	no	no
sr12613	chr03	302061	302996	-1	no	0.122	311	Cytoplasmic	7.7	no	no
sr12614	chr03	303819	304565	1	yes	0.587	191	Membrane bound Golgi	4.2	yes	yes
sr12615	chr03	304870	307158	1	no	0.102	762	Nuclear	4.7	no	no
sr12616	chr03	307267	312930	-1	no	0.111	1887	Nuclear	3.6	no	no
sr12617	chr03	313935	318062	1	no	0.127	1375	Plasma membrane	6.2	no	no
sr12618	chr03	318126	320411	-1	no	0.256	761	Nuclear	3.6	no	no
sr12619	chr03	326894	330500	1	no	0.371	1128	Membrane bound Mitochondrial	3.1	no	no
sr12620	chr03	331801	333594	1	no	0.1	533	Membrane bound Endoplasmic reticulum	6.8	no	no
sr12621	chr03	333944	335365	1	no	0.098	473	Nuclear	5.6	no	no
sr12622	chr03	337094	338131	1	no	0.106	345	Cytoplasmic	9.3	no	no
sr12623	chr03	338429	339397	-1	no	0.103	298	Cytoplasmic	5.6	no	no
sr12624	chr03	339927	343379	1	no	0.152	1150	Cytoplasmic	3.2	no	no
sr12625	chr03	343503	344336	-1	yes	0.741	277	Membrane bound Mitochondrial	2.3	yes	yes
sr12626	chr03	344878	346674	-1	no	0.121	598	Nuclear	6.3	no	no
sr12627	chr03	347614	348399	-1	yes	0.779	201	Membrane bound Extracellular (Secreted)	7.6	yes	yes
sr12628	chr03	349257	352646	-1	no	0.108	1129	Nuclear	4.7	no	no
sr12629	chr03	353840	354940	1	no	0.245	366	Membrane bound Mitochondrial	7.1	no	no
sr12630	chr03	354991	356476	-1	no	0.133	467	Nuclear	4.3	no	no
sr12631	chr03	356812	359664	1	no	0.119	950	Plasma membrane	2.8	no	no
sr12632	chr03	359730	363035	-1	no	0.101	1101	Cytoplasmic	3.1	no	no
sr12633	chr03	363873	365256	-1	no	0.098	438	Membrane bound Mitochondrial	7.5	no	no
sr12634	chr03	365842	366341	-1	no	0.141	97	Mitochondrial	9.3	no	no
sr12635	chr03	366677	369814	1	no	0.145	1045	Membrane bound Mitochondrial	5.5	no	no
sr12636	chr03	370101	371019	1	no	0.209	277	Plasma membrane	2.6	no	no
sr12637	chr03	371119	373314	-1	no	0.099	731	Membrane bound Vacuolar	7.9	no	no
sr12638	chr03	373769	375838	1	no	0.28	689	Plasma membrane	3.5	no	no
sr12639	chr03	375923	377965	-1	no	0.151	680	Cytoplasmic	6.5	no	no
sr12640	chr03	378395	379347	-1	no	0.221	293	Cytoplasmic	7.8	no	no
sr12641	chr03	379737	381834	-1	no	0.136	667	Nuclear	6.6	no	no
sr12642	chr03	382449	386885	1	no	0.115	1478	Plasma membrane	8.6	no	no
sr12643	chr03	390403	392718	1	no	0.102	771	Nuclear	5.5	no	no
sr12644	chr03	393221	396289	1	no	0.105	1022	Membrane bound Mitochondrial	7.5	no	no
sr12645	chr03	396373	396849	-1	no	0.259	158	Membrane bound Mitochondrial	7.3	no	no
sr12646	chr03	397442	398344	1	no	0.102	300	Membrane bound Endoplasmic reticulum	9.7	no	no
sr12647	chr03	400069	404526	1	yes	0.786	1485	Plasma membrane	8.3	yes	no
sr12648	chr03	406463	409801	1	no	0.14	1112	Nuclear	6.1	no	no
sr12649	chr03	410694	414305	1	no	0.106	1203	Cytoplasmic	4.6	no	no
sr12650	chr03	414691	415311	1	no	0.174	206	Mitochondrial	5.3	no	no
sr12651	chr03	415440	416650	-1	no	0.165	381	Membrane bound Mitochondrial	5	no	no
sr12652	chr03	417619	418721	1	no	0.174	338	Cytoplasmic	4.8	no	no
sr12653	chr03	418861	421047	-1	no	0.109	728	Nuclear	6.4	no	no
sr12654	chr03	421356	422324	1	no	0.122	265	Membrane bound Mitochondrial	7.8	no	no
sr12655	chr03	422564	427033	-1	no	0.113	1489	Plasma membrane	7.8	no	no
sr12656	chr03	430246	431982	-1	no	0.114	520	Membrane bound Mitochondrial	3.4	no	no
sr12657	chr03	432517	433262	1	no	0.107	133	Nuclear	6.4	no	no
sr12658	chr03	433403	434317	-1	no	0.199	274	Cytoplasmic	3.8	no	no
sr12659	chr03	434769	436454	1	no	0.12	503	Nuclear	9.9	no	no
sr12660	chr03	436984	438396	-1	no	0.101	470	Nuclear	6.8	no	no
sr12661	chr03	439585	440691	1	yes	0.831	368	Membrane bound Endoplasmic reticulum	3.8	yes	yes
sr12662	chr03	441022	443199	1	no	0.103	725	Nuclear	4.5	no	no
sr12663	chr03	443423	444439	-1	no	0.116	309	Membrane bound Mitochondrial	9.2	no	no
sr12664	chr03	444713	445441	-1	no	0.213	242	Nuclear	5.5	no	no
sr12665	chr03	445975	446926	1	no	0.104	218	Nuclear	7.5	no	no
sr12666	chr03	447195	448419	-1	no	0.099	377	Cytoplasmic	10	no	no
sr12667	chr03	448921	450411	-1	no	0.104	485	Cytoplasmic	3.6	no	no
sr12668	chr03	450770	451640	-1	no	0.114	181	Membrane bound Endoplasmic reticulum	8.1	no	no
sr12669	chr03	451980	453425	-1	no	0.172	453	Cytoplasmic	4	no	no
sr12670	chr03	457387	458868	-1	yes	0.895	493	Membrane bound Lysosomal	8	yes	no
sr12671	chr03	459537	461948	-1	no	0.103	803	Nuclear	3.5	no	no
sr12672	chr03	462528	465674	1	no	0.113	1048	Membrane bound Endoplasmic reticulum	6.7	no	no
sr12673	chr03	465725	466570	-1	no	0.144	255	Plasma membrane	3.4	no	no
sr12674	chr03	466879	467982	1	no	0.113	367	Mitochondrial	6.2	no	no
sr12675	chr03	468597	469815	-1	no	0.12	291	Membrane bound Mitochondrial	4.2	no	no
sr12676	chr03	471018	471872	-1	no	0.099	284	Cytoplasmic	4	no	no
sr12677	chr03	473557	475452	1	no	0.447	631	Plasma membrane	3.1	no	no
sr12678	chr03	475554	481130	-1	no	0.106	1858	Membrane bound Vacuolar	9.6	no	no
sr12679	chr03	481864	483366	1	no	0.143	500	Membrane bound Golgi	9.9	no	no
sr12680	chr03	483676	486420	-1	no	0.103	914	Nuclear	6.4	no	no
sr12681	chr03	488013	488658	1	no	0.109	190	Cytoplasmic	9.3	no	no
sr12682	chr03	488712	490415	-1	no	0.114	567	Nuclear	5.5	no	no
sr12683	chr03	491296	492888	-1	no	0.102	530	Membrane bound Mitochondrial	3	no	no
sr12684	chr03	493280	494518	-1	no	0.112	412	Nuclear	4.9	no	no
sr12685	chr03	495500	495970	1	no	0.257	156	Extracellular (Secreted)	6.7	yes	no
sr12686	chr03	497424	500021	1	no	0.156	865	Membrane bound Mitochondrial	9.8	no	no
sr12687	chr03	500705	502285	1	no	0.103	526	Cytoplasmic	4.9	no	no
sr12688	chr03	502462	503331	-1	no	0.101	289	Nuclear	9.9	no	no
sr12689	chr03	503904	504386	1	no	0.123	160	Mitochondrial	8.4	no	no
sr12690	chr03	510846	512594	-1	no	0.133	582	Nuclear	5.6	no	no
sr12691	chr03	513917	516330	1	no	0.124	773	Cytoplasmic	2.2	no	no
sr12692	chr03	516573	517173	-1	no	0.155	173	Membrane bound Mitochondrial	9.9	no	no
sr12693	chr03	518104	524316	1	no	0.104	2070	Plasma membrane	4.9	no	no
sr12694	chr03	524446	526044	-1	no	0.115	532	Membrane bound Mitochondrial	6.3	no	no
sr12695	chr03	526599	528164	-1	no	0.229	474	Membrane bound Mitochondrial	7	no	no
sr12696	chr03	529523	530139	1	no	0.143	176	Plasma membrane	4.3	no	no
sr12697	chr03	530569	531291	-1	yes	0.757	240	Extracellular (Secreted)	4.5	yes	yes
sr12698	chr03	533368	534717	-1	no	0.413	449	Membrane bound Mitochondrial	4	no	no
sr12699	chr03	535248	535580	1	no	0.102	110	Nuclear	9.2	no	no
sr12700	chr03	536846	537865	1	yes	0.837	339	Plasma membrane	3.1	yes	yes
sr12701	chr03	538190	539740	-1	no	0.161	516	Membrane bound Mitochondrial	5.8	no	no
sr12702	chr03	540471	541058	-1	no	0.134	195	Cytoplasmic	8.7	no	no
sr12703	chr03	542963	544227	1	no	0.128	83	Cytoplasmic	7.5	no	no
sr12704	chr03	544825	546911	-1	no	0.103	551	Membrane bound Endoplasmic reticulum	9.5	no	no
sr12705	chr03	547387	548218	-1	yes	0.452	218	Plasma membrane	9.1	yes	no
sr12706	chr03	548616	550166	-1	no	0.107	516	Mitochondrial	4.8	no	no
sr12707	chr03	551186	556552	-1	no	0.119	1788	Plasma membrane	9.2	no	no
sr12708	chr03	560585	562309	1	yes	0.802	574	Plasma membrane	9.8	yes	no
sr12709	chr03	562623	564425	-1	no	0.103	600	Plasma membrane	7.9	no	no
sr12710	chr03	565190	566911	1	no	0.108	546	Nuclear	6.5	no	no
sr12711	chr03	568887	569465	1	no	0.198	192	Plasma membrane	8.5	no	no
sr12712	chr03	570989	572905	-1	no	0.121	639	Nuclear	7	no	no
sr12713	chr03	574668	576227	-1	no	0.117	519	Membrane bound Golgi	8.8	no	no
sr12714	chr03	576599	579754	-1	no	0.107	1021	Nuclear	9.9	no	no
sr12715	chr03	580542	582280	-1	no	0.102	541	Nuclear	9.8	no	no
sr12716	chr03	582808	585237	-1	no	0.106	809	Cytoplasmic	4.3	no	no
sr12717	chr03	587214	588397	1	no	0.103	369	Nuclear	5.5	no	no
sr12718	chr03	588824	589999	-1	no	0.108	391	Membrane bound Endoplasmic reticulum	5.8	no	no
sr12719	chr03	592077	593065	1	no	0.101	213	Membrane bound Golgi	6.6	no	no
sr12720	chr03	594333	600389	1	no	0.102	2018	Nuclear	3.1	no	no
sr12721	chr03	600478	602010	-1	no	0.182	510	Plasma membrane	7.6	no	no
sr12722	chr03	602286	603734	1	no	0.109	454	Membrane bound Peroxisomal	7.6	no	no
sr12723	chr03	603892	604242	-1	no	0.099	56	Cytoplasmic	6.2	no	no
sr12724	chr03	605516	606979	1	no	0.104	461	Membrane bound Lysosomal	4.4	no	no
sr12725	chr03	610077	611786	1	no	0.128	569	Plasma membrane	8.9	no	no
sr12726	chr03	613330	619185	-1	no	0.101	1951	Nuclear	5.8	no	no
sr12727	chr03	620176	621795	1	no	0.116	451	Membrane bound Mitochondrial	6.3	no	no
sr12728	chr03	621923	623186	-1	no	0.106	396	Cytoplasmic	6	no	no
sr12729	chr03	623779	627273	1	no	0.104	1164	Cytoplasmic	8.2	no	no
sr12730	chr03	632139	633962	1	no	0.102	607	Nuclear	6.8	no	no
sr12731	chr03	634670	640552	-1	no	0.106	1960	Nuclear	3.2	no	no
sr12732	chr03	641679	644135	-1	no	0.101	818	Nuclear	5.5	no	no
sr12733	chr03	646181	647311	-1	no	0.124	376	Cytoplasmic	7.8	no	no
sr12734	chr03	650212	651612	1	no	0.16	466	Nuclear	7.1	no	no
sr12735	chr03	653700	654665	1	no	0.1	321	Membrane bound Mitochondrial	9.6	no	no
sr12736	chr03	654988	655482	1	no	0.111	76	Membrane bound Mitochondrial	9.4	no	no
sr12737	chr03	656016	657421	-1	no	0.112	443	Nuclear	4	no	no
sr12738	chr03	658208	661813	-1	no	0.18	1201	Cytoplasmic	4.4	no	no
sr12739	chr03	662560	664061	1	no	0.101	474	Cytoplasmic	7	no	no
sr12740	chr03	664446	667373	1	no	0.108	975	Cytoplasmic	2.2	no	no
sr12741	chr03	668078	670138	1	no	0.118	686	Cytoplasmic	3.3	no	no
sr12742	chr03	670549	671541	-1	no	0.193	330	Membrane bound Mitochondrial	10	no	no
sr12743	chr03	672430	675030	-1	no	0.118	866	Nuclear	6.6	no	no
sr12744	chr03	675661	676647	1	no	0.1	328	Cytoplasmic	8.6	no	no
sr12745	chr03	677330	679777	1	no	0.107	815	Nuclear	5.7	no	no
sr12746	chr03	679908	681503	-1	no	0.173	531	Nuclear	5.3	no	no
sr12747	chr03	682166	682637	-1	no	0.104	125	Nuclear	5	no	no
sr12748	chr03	683096	684607	-1	no	0.143	503	Nuclear	6.3	no	no
sr12749	chr03	688222	690957	1	no	0.099	911	Nuclear	10	no	no
sr12750	chr03	691678	694962	1	no	0.242	1094	Membrane bound Mitochondrial	3.6	no	no
sr12751	chr03	695129	696122	-1	no	0.268	293	Mitochondrial	9.9	no	no
sr12752	chr03	696640	697482	1	no	0.099	280	Mitochondrial	4	no	no
sr12753	chr03	697890	699755	1	no	0.125	621	Plasma membrane	2.8	no	no
sr12754	chr03	699932	700747	-1	no	0.11	239	Membrane bound Mitochondrial	4.4	no	no
sr12755	chr03	703028	705640	1	no	0.108	870	Membrane bound Mitochondrial	2.8	no	no
sr12757	chr03	707747	710008	-1	no	0.103	753	Plasma membrane	3.7	no	no
sr12758	chr03	710782	711864	1	no	0.1	361	Cytoplasmic	9.9	no	no
sr12759	chr03	713149	715448	1	no	0.236	660	Cytoplasmic	3.4	no	no
sr12760	chr03	715961	716938	1	yes	0.886	325	Plasma membrane	2.2	yes	yes
sr12761	chr03	717287	717835	-1	yes	0.8	182	Extracellular (Secreted)	3.9	yes	yes
sr12762	chr03	719374	722943	1	no	0.1	1189	Nuclear	5	no	no
sr12763	chr03	723312	724478	1	no	0.143	388	Cytoplasmic	5.5	no	no
sr12764	chr03	724564	727494	-1	no	0.137	976	Membrane bound Mitochondrial	9.9	no	no
sr12765	chr03	727766	730459	-1	no	0.104	897	Plasma membrane	6.4	no	no
sr12766	chr03	731472	734147	-1	no	0.104	891	Nuclear	6.2	no	no
sr12767	chr03	734980	738024	-1	yes	0.708	923	Cytoplasmic	2.1	yes	yes
sr12768	chr03	739031	740716	-1	no	0.101	561	Nuclear	6.7	no	no
sr12769	chr03	741411	745982	1	no	0.127	1523	Cytoplasmic	10	no	no
sr12770	chr03	747994	750735	1	no	0.121	913	Nuclear	6.2	no	no
sr12771	chr03	751498	752904	1	no	0.148	468	Membrane bound Mitochondrial	6.5	no	no
sr12772	chr03	752988	756281	-1	yes	0.532	1097	Plasma membrane	8.7	yes	no
sr12773	chr03	756680	758083	1	no	0.109	467	Membrane bound Mitochondrial	8.7	no	no
sr12774	chr03	758130	758660	-1	no	0.151	176	Membrane bound Golgi	6.7	no	no
sr12775	chr03	759296	765688	-1	no	0.111	2130	Cytoplasmic	4.2	no	no
sr12776	chr03	766661	769714	1	no	0.13	1017	Nuclear	4.8	no	no
sr12777	chr03	770418	772211	1	no	0.118	597	Membrane bound Mitochondrial	4.6	no	no
sr12778	chr03	772268	774226	-1	yes	0.596	630	Membrane bound Mitochondrial	2.3	yes	yes
sr12779	chr03	774514	775587	1	no	0.106	357	Cytoplasmic	4.1	no	no
sr12780	chr03	775647	776043	-1	yes	0.849	107	Extracellular (Secreted)	9	yes	yes
sr12781	chr03	776807	778618	1	no	0.127	509	Membrane bound Golgi	9.5	no	no
sr12782	chr03	778702	779681	-1	no	0.233	294	Cytoplasmic	6.4	no	no
sr12783	chr03	780207	781349	1	no	0.236	380	Membrane bound Mitochondrial	6.7	no	no
sr12784	chr03	781422	783221	-1	no	0.102	599	Nuclear	6.6	no	no
sr12785	chr03	783557	785110	1	no	0.2	460	Membrane bound Mitochondrial	7.7	no	no
sr12786	chr03	786305	788128	1	no	0.104	607	Cytoplasmic	4.2	no	no
sr12787	chr03	789406	790248	1	no	0.11	250	Cytoplasmic	8.1	no	no
sr12788	chr03	791051	792841	1	no	0.105	596	Plasma membrane	4.2	no	no
sr12789	chr03	793948	795408	1	no	0.119	486	Membrane bound Mitochondrial	8	no	no
sr12790	chr03	795654	797052	-1	no	0.179	441	Membrane bound Mitochondrial	4.6	no	no
sr12791	chr03	798053	798847	1	no	0.119	264	Membrane bound Mitochondrial	2.4	no	no
sr12792	chr03	798977	800278	-1	no	0.13	433	Cytoplasmic	3.1	no	no
sr12793	chr03	802379	803325	1	no	0.099	291	Cytoplasmic	10	no	no
sr12794	chr03	803427	805634	-1	no	0.116	735	Nuclear	2.5	no	no
sr12795	chr03	806589	808445	1	no	0.108	618	Cytoplasmic	8.7	no	no
sr12796	chr03	808893	811532	1	no	0.106	879	Cytoplasmic	3.7	no	no
sr12797	chr03	811674	813275	-1	no	0.159	533	Membrane bound Mitochondrial	7.6	no	no
sr12798	chr03	813875	815623	-1	no	0.119	582	Membrane bound Mitochondrial	2.3	no	no
sr12799	chr03	816835	817620	-1	no	0.128	261	Mitochondrial	9.2	no	no
sr12800	chr03	818068	818687	-1	yes	0.916	177	Membrane bound Mitochondrial	6.5	yes	yes
sr12801	chr03	820868	821479	-1	no	0.142	203	Cytoplasmic	7	no	no
sr12802	chr03	821962	823175	1	no	0.16	354	Membrane bound Mitochondrial	5.5	no	no
sr12803	chr03	823250	823921	-1	no	0.253	223	Membrane bound Mitochondrial	9.9	no	no
sr12804	chr03	824349	826769	1	no	0.117	806	Nuclear	3.7	no	no
sr12805	chr03	826885	828309	-1	no	0.207	474	Plasma membrane	2.9	no	no
sr12806	chr03	828614	830410	-1	no	0.128	598	Membrane bound Mitochondrial	7.8	no	no
sr12807	chr03	831165	832934	1	no	0.108	589	Membrane bound Endoplasmic reticulum	6.2	no	no
sr12808	chr03	833472	834396	1	no	0.111	274	Mitochondrial	9.2	no	no
sr12809	chr03	834844	835737	1	yes	0.74	297	Mitochondrial	5.7	yes	yes
sr12810	chr03	835871	836687	-1	no	0.158	246	Plasma membrane	9.3	no	no
sr12811	chr03	837228	838130	1	no	0.099	300	Nuclear	3.8	no	no
sr12812	chr03	838565	840567	1	no	0.283	616	Membrane bound Endoplasmic reticulum	5.8	no	no
sr12813	chr03	840620	842113	-1	no	0.148	497	Plasma membrane	4.2	no	no
sr12814	chr03	842428	843618	-1	no	0.433	396	Plasma membrane	3.9	no	no
sr12815	chr03	844226	845359	1	no	0.119	377	Cytoplasmic	4.4	no	no
sr12816	chr03	845838	846357	1	no	0.1	83	Cytoplasmic	8.5	no	no
sr12817	chr03	846707	848323	1	no	0.119	538	Nuclear	3.3	no	no
sr12818	chr03	848345	849664	-1	no	0.11	439	Nuclear	4.9	no	no
sr12819	chr03	849978	851992	1	yes	0.488	569	Nuclear	4	yes	yes
sr12820	chr03	853858	857265	1	no	0.102	1102	Plasma membrane	9.7	no	no
sr12821	chr03	857925	862508	1	no	0.154	1527	Plasma membrane	6.8	no	no
sr12822	chr03	864351	867788	1	no	0.103	1145	Nuclear	4	no	no
sr12823	chr03	867892	868896	-1	no	0.103	334	Membrane bound Mitochondrial	8.4	no	no
sr12824	chr03	869905	871149	1	no	0.129	414	Cytoplasmic	6.2	no	no
sr12825	chr03	871328	873094	-1	no	0.104	588	Nuclear	6.7	no	no
sr12826	chr03	873940	875091	1	yes	0.764	383	Extracellular (Secreted)	9.5	yes	yes
sr12827	chr03	875780	876817	1	no	0.17	345	Membrane bound Endoplasmic reticulum	4.7	no	no
sr12828	chr03	876915	878036	-1	no	0.135	373	Cytoplasmic	2.2	no	no
sr12829	chr03	878224	880476	-1	no	0.113	750	Cytoplasmic	3.3	no	no
sr12830	chr03	880962	881720	1	no	0.107	252	Nuclear	5.4	no	no
sr12831	chr03	881782	882780	-1	no	0.118	332	Cytoplasmic	9.6	no	no
sr12832	chr03	883122	884060	-1	no	0.107	312	Cytoplasmic	4.6	no	no
sr12833	chr03	884988	886979	1	no	0.122	663	Nuclear	6.2	no	no
sr12834	chr03	887188	889101	-1	no	0.146	637	Membrane bound Golgi	7.4	no	no
sr12835	chr03	891661	896253	-1	no	0.131	1530	Membrane bound Endoplasmic reticulum	3.2	no	no
sr12836	chr03	897401	898528	-1	no	0.11	375	Plasma membrane	3.5	no	no
sr12837	chr03	899361	899840	1	no	0.15	81	Mitochondrial	7.2	no	no
sr12838	chr03	900053	900544	-1	no	0.114	138	Extracellular (Secreted)	3.8	yes	no
sr12839	chr03	901450	903744	-1	no	0.107	764	Nuclear	6.9	no	no
sr12840	chr03	904136	906211	1	no	0.109	691	Plasma membrane	4.3	no	no
sr12841	chr03	906381	908642	-1	no	0.111	753	Nuclear	4.6	no	no
sr12842	chr03	909147	909887	1	no	0.107	215	Mitochondrial	6.7	no	no
sr12843	chr03	909957	911267	-1	no	0.111	436	Membrane bound Mitochondrial	2.3	no	no
sr12844	chr03	911505	912607	-1	no	0.103	344	Mitochondrial	5.5	no	no
sr12845	chr03	912825	913642	1	no	0.114	246	Mitochondrial	5.6	no	no
sr12846	chr03	913699	916185	-1	no	0.1	828	Membrane bound Mitochondrial	2.8	no	no
sr12847	chr03	916614	917437	1	no	0.1	247	Membrane bound Mitochondrial	4.6	no	no
sr12848	chr03	917562	918321	-1	no	0.117	227	Mitochondrial	7.1	no	no
sr12849	chr03	918700	919161	1	no	0.215	153	Cytoplasmic	4.7	no	no
sr12850	chr03	919280	920671	-1	yes	0.846	463	Extracellular (Secreted)	8.6	yes	yes
sr12851	chr03	921794	922807	-1	no	0.113	337	Membrane bound Endoplasmic reticulum	4.9	no	no
sr12852	chr03	923144	925792	1	yes	0.774	882	Cytoplasmic	5.9	yes	yes
sr12853	chr03	926641	927948	1	no	0.202	435	Membrane bound Golgi	7.7	no	no
sr12854	chr03	928078	929103	-1	no	0.191	341	Membrane bound Mitochondrial	5.8	no	no
sr12855	chr03	929414	930301	-1	no	0.173	295	Plasma membrane	8.8	no	no
sr12856	chr03	931949	933112	1	yes	0.716	387	Extracellular (Secreted)	9.8	yes	yes
sr12857	chr03	934492	935532	1	yes	0.731	346	Membrane bound Extracellular (Secreted)	9.6	yes	no
sr12858	chr03	935962	936881	1	no	0.104	253	Plasma membrane	5.4	no	no
sr12859	chr03	937148	937597	1	no	0.119	122	Cytoplasmic	5.4	no	no
sr12860	chr03	937823	938987	-1	no	0.173	332	Membrane bound Mitochondrial	4.8	no	no
sr12861	chr03	939727	941016	-1	no	0.118	429	Membrane bound Mitochondrial	4.2	no	no
sr12862	chr03	941758	942398	1	no	0.103	161	Cytoplasmic	5.2	no	no
sr12863	chr03	942662	943702	-1	no	0.114	346	Membrane bound Mitochondrial	5.3	no	no
sr12864	chr03	944405	946294	-1	no	0.374	629	Membrane bound Mitochondrial	2.2	no	no
sr12865	chr03	946778	948115	1	no	0.143	445	Cytoplasmic	7.4	no	no
sr12866	chr03	950214	951122	1	yes	0.749	302	Membrane bound Extracellular (Secreted)	6.3	yes	yes
sr12867	chr03	951390	952101	-1	no	0.301	137	Membrane bound Endoplasmic reticulum	9.8	no	no
sr12868	chr03	952528	955309	1	no	0.137	798	Nuclear	5.6	no	no
sr12869	chr03	955787	959047	1	no	0.143	1086	Plasma membrane	4.6	no	no
sr12870	chr03	959146	960444	-1	no	0.103	432	Membrane bound Endoplasmic reticulum	7.4	no	no
sr12871	chr03	961441	962592	1	no	0.113	383	Cytoplasmic	7	no	no
sr12872	chr03	962902	964560	1	no	0.114	552	Cytoplasmic	4.4	no	no
sr12873	chr03	964670	965644	-1	no	0.137	324	Cytoplasmic	3.4	no	no
sr12874	chr03	967937	969925	1	no	0.15	662	Plasma membrane	8.2	no	no
sr12875	chr03	970423	971595	1	no	0.13	390	Membrane bound Mitochondrial	9.8	no	no
sr12876	chr03	971748	972764	-1	no	0.105	338	Cytoplasmic	7.4	no	no
sr12877	chr03	973753	974500	-1	no	0.107	223	Cytoplasmic	9.9	no	no
sr12878	chr03	974832	975303	-1	yes	0.876	128	Extracellular (Secreted)	9.7	yes	yes
sr12879	chr03	977196	978392	1	yes	0.941	398	Endoplasmic reticulum	9.9	yes	no
sr12880	chr03	978757	980985	1	no	0.106	742	Membrane bound Endoplasmic reticulum	8	no	no
sr12881	chr03	982646	984157	1	no	0.103	503	Membrane bound Mitochondrial	9.7	no	no
sr12882	chr03	985186	986214	1	no	0.228	342	Plasma membrane	6.6	no	no
sr12883	chr03	986404	988533	-1	no	0.106	709	Membrane bound Mitochondrial	7	no	no
sr12884	chr03	990138	991475	1	no	0.126	445	Nuclear	4	no	no
sr12885	chr03	991904	992749	1	yes	0.705	281	Extracellular (Secreted)	3.3	yes	yes
sr12886	chr03	993291	994475	-1	yes	0.869	394	Plasma membrane	4	yes	yes
sr12887	chr03	995932	997248	-1	no	0.133	438	Cytoplasmic	5.2	no	no
sr12888	chr03	997952	999126	-1	no	0.127	339	Cytoplasmic	2.8	no	no
sr12889	chr03	999387	1000790	-1	no	0.143	467	Plasma membrane	6.3	no	no
sr12890	chr03	1001554	1003356	1	no	0.103	600	Membrane bound Endoplasmic reticulum	6.8	no	no
sr12891	chr03	1003522	1004937	-1	no	0.167	471	Membrane bound Mitochondrial	6.4	no	no
sr12892	chr03	1005311	1006277	1	no	0.115	294	Cytoplasmic	3.2	no	no
sr12893	chr03	1006349	1007380	-1	no	0.102	343	Cytoplasmic	9.2	no	no
sr12894	chr03	1007635	1008306	1	no	0.099	223	Nuclear	7.6	no	no
sr12895	chr03	1008425	1009351	-1	no	0.111	308	Cytoplasmic	7.9	no	no
sr12896	chr03	1009993	1012706	1	no	0.099	867	Membrane bound Extracellular (Secreted)	3.1	no	no
sr12897	chr03	1013635	1014381	1	yes	0.851	248	Mitochondrial	5.7	yes	yes
sr12898	chr03	1015058	1016254	-1	yes	0.761	398	Golgi	9.9	yes	no
sr12899	chr03	1017344	1018312	1	no	0.147	292	Membrane bound Peroxisomal	9.5	no	no
sr12900	chr03	1018563	1020062	1	no	0.104	400	Membrane bound Mitochondrial	6.5	no	no
sr12901	chr03	1020406	1021482	1	no	0.144	358	Membrane bound Mitochondrial	9.8	no	no
sr12902	chr03	1021737	1022396	-1	yes	0.822	219	Membrane bound Extracellular (Secreted)	6.3	yes	yes
sr12903	chr03	1023720	1024733	1	no	0.125	307	Membrane bound Mitochondrial	5.8	no	no
sr12904	chr03	1024797	1025761	-1	no	0.112	310	Membrane bound Mitochondrial	6.4	no	no
sr12905	chr03	1026089	1026844	-1	no	0.11	251	Mitochondrial	2.3	no	no
sr12906	chr03	1028970	1033817	1	no	0.117	1614	Membrane bound Endoplasmic reticulum	6.9	no	no
sr12907	chr03	1035748	1037271	1	no	0.12	507	Cytoplasmic	4.6	no	no
sr12908	chr03	1038156	1038672	1	no	0.134	92	Membrane bound Endoplasmic reticulum	4.4	no	no
sr12909	chr03	1038761	1042189	-1	no	0.138	1142	Nuclear	3.6	no	no
sr12910	chr03	1042492	1044210	-1	no	0.133	572	Nuclear	5.3	no	no
sr12911	chr03	1044579	1046803	-1	yes	0.709	707	Membrane bound Mitochondrial	3.4	yes	yes
sr12912	chr03	1047393	1050718	-1	no	0.117	1078	Cytoplasmic	3.1	no	no
sr12913	chr03	1051792	1052673	1	no	0.444	293	Mitochondrial	7.5	no	no
sr12925	chr03	1052897	1054303	-1	no	0.13	468	Plasma membrane	6.1	no	no
sr12924	chr03	1055012	1057060	1	no	0.1	682	Membrane bound Endoplasmic reticulum	5.4	no	no
sr12923	chr03	1057220	1058749	-1	no	0.196	509	Nuclear	5.8	no	no
sr12922	chr03	1059208	1059852	-1	no	0.149	214	Extracellular (Secreted)	6.2	yes	no
sr12921	chr03	1060340	1062538	1	no	0.112	732	Membrane bound Mitochondrial	6.6	no	no
sr12920	chr03	1062626	1064332	-1	yes	0.773	568	Membrane bound Extracellular (Secreted)	4.7	yes	yes
sr12919	chr03	1065499	1066743	1	no	0.111	414	Membrane bound Peroxisomal	4.6	no	no
sr12918	chr03	1070256	1072028	1	no	0.103	590	Membrane bound Vacuolar	9.6	no	no
sr12917	chr03	1072314	1072761	-1	no	0.215	101	Membrane bound Mitochondrial	6.5	no	no
sr12916	chr03	1073011	1074429	1	no	0.1	472	Membrane bound Endoplasmic reticulum	8.3	no	no
sr12915	chr03	1074494	1075642	-1	no	0.213	382	Membrane bound Mitochondrial	6.5	no	no
sr12914	chr03	1075925	1078150	-1	no	0.13	741	Nuclear	4.9	no	no
sr12926	chr03	1079245	1081004	1	no	0.108	564	Mitochondrial	4.6	no	no
sr12927	chr03	1081463	1083352	1	no	0.106	629	Cytoplasmic	3.9	no	no
sr12928	chr03	1083432	1085732	-1	no	0.108	766	Membrane bound Mitochondrial	9.2	no	no
sr12929	chr03	1086942	1087754	1	no	0.102	246	Membrane bound Mitochondrial	6.3	no	no
sr12930	chr03	1087950	1088763	-1	no	0.138	188	Cytoplasmic	9.2	no	no
sr12931	chr03	1089084	1091099	-1	no	0.121	671	Nuclear	9.7	no	no
sr12932	chr03	1092075	1092641	1	no	0.105	188	Cytoplasmic	5.4	no	no
sr12933	chr03	1093047	1093835	-1	yes	0.697	230	Membrane bound Mitochondrial	5.4	yes	yes
sr12934	chr03	1095644	1096822	1	no	0.101	392	Cytoplasmic	2.8	no	no
sr12935	chr03	1096901	1098259	-1	no	0.098	452	Membrane bound Mitochondrial	5.7	no	no
sr10553.2	chr03	1099008	1100969	-1	no	0.158	652	Nuclear	3.7	no	no
sr10554	chr03	1101490	1103469	-1	yes	0.712	659	Extracellular (Secreted)	7.8	yes	yes
sr10555	chr03	1104617	1106155	-1	yes	0.852	512	Membrane bound Mitochondrial	2.6	yes	yes
sr10556	chr03	1106880	1108058	1	no	0.244	392	Membrane bound Mitochondrial	9.6	no	no
sr10548.2	chr03	1111276	1112211	-1	no	0.115	310	Cytoplasmic	4	no	no
sr10560	chr03	1115933	1117859	1	no	0.118	615	Cytoplasmic	3.4	no	no
sr10561	chr03	1117972	1118655	-1	no	0.3	198	Membrane bound Mitochondrial	9.4	no	no
sr10563.2	chr03	1119579	1119950	1	no	0.108	123	Extracellular (Secreted)	9.3	yes	yes
sr10565.2	chr03	1120535	1127895	1	no	0.162	2266	Plasma membrane	6.2	no	no
sr10566	chr03	1128341	1129174	1	no	0.121	277	Cytoplasmic	4.7	no	no
sr10569	chr03	1131234	1132559	-1	no	0.099	441	Membrane bound Endoplasmic reticulum	4.2	no	no
sr10570	chr03	1133420	1135093	-1	no	0.184	557	Membrane bound Mitochondrial	5.6	no	no
sr10572	chr03	1136688	1137097	-1	no	0.217	87	Plasma membrane	9.7	no	no
sr10573	chr03	1137475	1140090	1	no	0.104	871	Nuclear	5	no	no
sr10575	chr03	1140185	1141951	-1	no	0.113	588	Nuclear	2.9	no	no
sr10576.2	chr03	1142427	1143133	1	no	0.102	206	Membrane bound Extracellular (Secreted)	2.3	no	no
sr10577	chr03	1143255	1146116	-1	no	0.14	953	Plasma membrane	2.4	no	no
sr10578	chr03	1149151	1150770	1	no	0.116	539	Plasma membrane	9.8	no	no
sr10581	chr03	1151419	1152462	1	no	0.122	347	Nuclear	3.8	no	no
sr10582	chr03	1152618	1154306	-1	no	0.112	537	Membrane bound Lysosomal	7.4	no	no
sr10584	chr03	1154691	1155674	-1	no	0.113	277	Endoplasmic reticulum	4.7	no	no
sr10586	chr03	1156048	1159056	1	yes	0.62	1002	Plasma membrane	2.9	yes	yes
sr10587	chr03	1160045	1161928	1	no	0.188	627	Cytoplasmic	5.1	no	no
sr10588	chr03	1161966	1164035	-1	no	0.11	689	Mitochondrial	2.6	no	no
sr10590	chr03	1164348	1166366	1	no	0.111	672	Nuclear	3	no	no
sr10591	chr03	1166470	1167672	-1	no	0.101	400	Membrane bound Extracellular (Secreted)	2	no	no
sr10592.2	chr03	1168272	1169078	-1	no	0.146	199	Membrane bound Vacuolar	3.6	no	no
sr10593.2	chr03	1169318	1171546	-1	no	0.114	742	Membrane bound Mitochondrial	4.3	no	no
sr10594	chr03	1172415	1173368	1	no	0.119	317	Membrane bound Mitochondrial	6.8	no	no
sr10595	chr03	1173404	1175047	-1	no	0.135	547	Membrane bound Mitochondrial	3.6	no	no
sr10597	chr03	1175464	1176747	1	yes	0.706	427	Plasma membrane	2.5	yes	yes
sr10598.2	chr03	1176884	1177242	-1	no	0.106	63	Nuclear	5.3	no	no
sr10599.2	chr03	1177681	1178778	-1	no	0.114	340	Membrane bound Endoplasmic reticulum	6	no	no
sr10601.2	chr03	1179486	1180403	-1	no	0.224	305	Extracellular (Secreted)	9.6	yes	yes
sr10602	chr03	1181019	1181802	1	no	0.216	232	Peroxisomal	7.1	no	no
sr10603	chr03	1182050	1183849	-1	no	0.103	599	Plasma membrane	9.8	no	no
sr10604	chr03	1185052	1186116	1	no	0.099	354	Cytoplasmic	10	no	no
sr10605	chr03	1186246	1186544	-1	no	0.102	74	Mitochondrial	5.3	no	no
sr10606	chr03	1187362	1189134	1	yes	0.754	590	Extracellular (Secreted)	7.4	yes	yes
sr10607	chr03	1189458	1191218	-1	yes	0.621	586	Membrane bound Lysosomal	3.4	yes	yes
sr10608	chr03	1192453	1195479	-1	no	0.19	1008	Nuclear	4.1	no	no
sr10610.2	chr03	1197500	1198762	-1	no	0.103	400	Mitochondrial	4.3	no	no
sr10611	chr03	1199598	1201354	-1	no	0.243	555	Membrane bound Endoplasmic reticulum	5.6	no	no
sr10613	chr03	1202086	1202555	-1	no	0.105	112	Extracellular (Secreted)	9.2	yes	yes
sr10614.2	chr03	1203370	1205635	-1	no	0.129	728	Membrane bound Mitochondrial	5.9	no	no
sr10615.2	chr03	1205900	1207717	-1	no	0.209	605	Membrane bound Peroxisomal	8.4	no	no
sr10616	chr03	1208272	1209714	1	no	0.122	480	Membrane bound Mitochondrial	3.1	no	no
sr10618	chr03	1210124	1210945	1	no	0.274	273	Membrane bound Mitochondrial	2.5	no	no
sr10619	chr03	1211928	1212401	1	yes	0.88	157	Membrane bound Mitochondrial	2.7	yes	yes
sr10620	chr03	1212752	1213160	-1	no	0.105	89	Mitochondrial	9.7	no	no
sr10621	chr03	1213537	1215120	-1	yes	0.821	527	Membrane bound Golgi	9.4	yes	no
sr10623	chr03	1216508	1217275	1	no	0.127	255	Membrane bound Golgi	8.8	no	no
sr10624	chr03	1218527	1219702	1	yes	0.917	391	Plasma membrane	9.7	yes	no
sr10626.2	chr03	1220994	1222892	1	no	0.117	632	Plasma membrane	9.8	no	no
sr10628.2	chr03	1223078	1226764	-1	yes	0.728	1228	Plasma membrane	4.5	yes	yes
sr10629	chr03	1230867	1232303	1	no	0.321	478	Plasma membrane	7.6	no	no
sr10630	chr03	1232478	1233521	-1	no	0.139	347	Membrane bound Mitochondrial	9.7	no	no
sr10632	chr03	1234184	1235514	1	no	0.16	389	Membrane bound Mitochondrial	9.4	no	no
[truncated: 4,676 more rows]

## Sheet: U. maydis
Name	Chr	Begin	End	Strand	Secreted	D	Length	Location	Score	CSEP relaxed	CSEP strict
um06480	chr01	1449	2078	-1	no	0.104	209	Membrane bound Mitochondrial	8.1	no	no
um10944	chr01	2632	4026	1	no	0.116	464	Membrane bound Mitochondrial	3.3	no	no
um10945	chr01	4217	5416	-1	no	0.43	399	Membrane bound Mitochondrial	8.6	no	no
um10946	chr01	5950	7473	-1	no	0.096	507	Plasma membrane	9.8	no	no
um00001-A	chr01	10941	11939	1	no	0.141	332	Cytoplasmic	7.5	no	no
um00002	chr01	12235	13887	-1	no	0.131	550	Membrane bound Mitochondrial	6.4	no	no
um00003	chr01	14650	16605	1	no	0.107	651	Plasma membrane	5.5	no	no
um12014	chr01	17204	18268	-1	no	0.124	354	Cytoplasmic	3.2	no	no
um00005	chr01	20239	21946	-1	no	0.145	534	Membrane bound Endoplasmic reticulum	3.1	no	no
um00006	chr01	23287	25596	-1	no	0.169	769	Membrane bound Endoplasmic reticulum	7.1	no	no
um00007	chr01	26549	27403	1	no	0.123	284	Membrane bound Endoplasmic reticulum	8	no	no
um00008	chr01	27615	28781	-1	no	0.116	388	Membrane bound Mitochondrial	6.2	no	no
um00009	chr01	29350	30055	-1	no	0.102	197	Cytoplasmic	9.1	no	no
um12107	chr01	30759	32576	1	no	0.221	605	Membrane bound Mitochondrial	6.7	no	no
um00011	chr01	33530	35215	1	no	0.133	561	Cytoplasmic	7	no	no
um00012	chr01	35332	35961	-1	no	0.136	209	Nuclear	4.3	no	no
um00013	chr01	36407	37291	-1	yes	0.768	294	Membrane bound Extracellular (Secreted)	8	yes	no
um15048	chr01	39379	41016	1	no	0.1	477	Membrane bound Mitochondrial	8.5	no	no
um12080	chr01	41189	42778	-1	no	0.101	529	Plasma membrane	9.9	no	no
um00017	chr01	44221	45111	1	no	0.38	296	Membrane bound Mitochondrial	6.6	no	no
um10000	chr01	46118	48670	1	yes	0.618	850	Plasma membrane	3.9	yes	yes
um10001	chr01	48714	49541	-1	no	0.116	275	Membrane bound Golgi	8.8	no	no
um10002	chr01	49932	51194	-1	no	0.115	420	Mitochondrial	6.9	no	no
um00020	chr01	52102	52944	1	no	0.111	280	Membrane bound Mitochondrial	4.4	no	no
um10003	chr01	53527	53835	-1	no	0.313	57	Plasma membrane	6.3	no	no
um10004	chr01	55090	56343	1	no	0.253	384	Plasma membrane	5.2	no	no
um12081	chr01	56469	57320	-1	no	0.155	283	Cytoplasmic	2.9	no	no
um10005	chr01	59131	61597	1	no	0.171	789	Nuclear	3.9	no	no
um10006	chr01	62267	63680	1	no	0.436	416	Membrane bound Endoplasmic reticulum	6.2	no	no
um10007	chr01	64253	65314	1	no	0.146	353	Cytoplasmic	9.1	no	no
um10008	chr01	65682	66698	1	no	0.138	338	Membrane bound Mitochondrial	6.1	no	no
um00025	chr01	66888	68297	-1	no	0.122	469	Cytoplasmic	3.7	no	no
um00026	chr01	71152	72279	1	no	0.14	375	Cytoplasmic	6.7	no	no
um00027	chr01	73005	73844	1	yes	0.846	249	Extracellular (Secreted)	8.9	yes	yes
um00028	chr01	75338	76188	1	no	0.106	189	Membrane bound Mitochondrial	7.3	no	no
um00029	chr01	76463	77461	-1	no	0.158	332	Cytoplasmic	8.5	no	no
um00030	chr01	78721	80739	-1	no	0.139	672	Membrane bound Mitochondrial	9.6	no	no
um00031	chr01	82101	83639	1	no	0.188	512	Plasma membrane	6.2	no	no
um00032	chr01	83967	84472	1	yes	0.829	142	Membrane bound Mitochondrial	6.6	yes	yes
um10009	chr01	85254	89048	1	no	0.103	1264	Nuclear	3	no	no
um00034	chr01	90753	92588	1	no	0.102	611	Plasma membrane	9.7	no	no
um10010	chr01	93099	93815	1	no	0.248	238	Mitochondrial	9.8	no	no
um00036	chr01	94510	95181	-1	no	0.165	223	Membrane bound Mitochondrial	8.7	no	no
um00037	chr01	96185	97849	-1	no	0.1	554	Cytoplasmic	6.1	no	no
um00038	chr01	99076	100437	1	no	0.104	453	Cytoplasmic	2.6	no	no
um00039	chr01	100547	101497	-1	no	0.115	316	Membrane bound Mitochondrial	4.1	no	no
um00040	chr01	101923	102843	-1	no	0.12	306	Nuclear	6	no	no
um00041	chr01	103263	105188	1	yes	0.543	641	Membrane bound Endoplasmic reticulum	5.9	yes	yes
um00042	chr01	105772	108021	1	no	0.307	749	Membrane bound Mitochondrial	9.4	no	no
um00043	chr01	108268	111468	-1	no	0.13	1066	Cytoplasmic	4.3	no	no
um10011	chr01	113401	114732	-1	no	0.139	443	Membrane bound Mitochondrial	9.1	no	no
um00045	chr01	115327	116462	1	no	0.132	346	Cytoplasmic	6.7	no	no
um00046	chr01	116604	117992	-1	no	0.132	462	Cytoplasmic	3.8	no	no
um00047	chr01	118703	119350	-1	no	0.144	215	Membrane bound Extracellular (Secreted)	6	no	no
um00048	chr01	119927	120676	1	no	0.167	249	Membrane bound Mitochondrial	7.4	no	no
um00049	chr01	120964	121476	-1	no	0.105	145	Plasma membrane	3.1	no	no
um00050	chr01	122349	123365	-1	no	0.212	338	Plasma membrane	7.7	no	no
um10012	chr01	125915	126358	-1	no	0.093	147	Membrane bound Extracellular (Secreted)	9.3	no	no
um10013	chr01	127498	129537	-1	no	0.17	679	Cytoplasmic	3.3	no	no
um00052	chr01	130259	130750	1	no	0.101	163	Nuclear	5.9	no	no
um00053	chr01	131362	132037	-1	no	0.184	158	Membrane bound Extracellular (Secreted)	6.5	no	no
um00054	chr01	132542	133648	-1	yes	0.793	368	Membrane bound Extracellular (Secreted)	7.3	yes	yes
um00055	chr01	133978	135570	-1	no	0.102	530	Membrane bound Vacuolar	9.5	no	no
um00056	chr01	138360	139850	1	no	0.102	496	Plasma membrane	9.8	no	no
um00057	chr01	140621	141361	1	no	0.101	214	Nuclear	2.9	no	no
um00058	chr01	141659	144046	-1	no	0.107	795	Nuclear	3.1	no	no
um00059	chr01	145401	146378	-1	no	0.259	325	Membrane bound Mitochondrial	8.9	no	no
um00060	chr01	146833	147174	1	no	0.192	113	Endoplasmic reticulum	6.7	no	no
um00061	chr01	149587	151392	1	no	0.101	601	Plasma membrane	7.3	no	no
um00062	chr01	151548	153574	1	no	0.11	375	Membrane bound Extracellular (Secreted)	4.5	no	no
um00063	chr01	153637	155205	-1	yes	0.896	522	Plasma membrane	7.1	yes	yes
um00064	chr01	157192	158385	-1	yes	0.71	397	Membrane bound Extracellular (Secreted)	7.8	yes	yes
um10014	chr01	162092	162568	-1	no	0.114	131	Membrane bound Mitochondrial	9.9	no	no
um10015	chr01	163942	165939	1	no	0.118	665	Plasma membrane	2.8	no	no
um00067	chr01	166012	172683	-1	no	0.338	2223	Membrane bound Vacuolar	4.3	no	no
um00068	chr01	173987	176584	-1	no	0.119	865	Plasma membrane	8.6	no	no
um10016	chr01	177250	180735	1	no	0.11	1161	Nuclear	3.5	no	no
um10017	chr01	180905	183109	-1	no	0.214	734	Membrane bound Endoplasmic reticulum	6.1	no	no
um00071	chr01	184059	185204	1	no	0.117	381	Cytoplasmic	4.1	no	no
um00072	chr01	186079	187560	1	yes	0.55	493	Membrane bound Extracellular (Secreted)	8.1	yes	no
um10018	chr01	188083	189678	1	no	0.118	531	Plasma membrane	4.1	no	no
um12085	chr01	189822	190430	-1	no	0.242	202	Membrane bound Extracellular (Secreted)	7.2	no	no
um00074	chr01	190968	191648	1	no	0.126	226	Nuclear	2.2	no	no
um10019	chr01	191818	195000	-1	no	0.126	945	Membrane bound Mitochondrial	4.8	no	no
um00076	chr01	196344	198140	1	no	0.103	598	Plasma membrane	9.8	no	no
um00077	chr01	198771	200339	1	no	0.112	522	Membrane bound Mitochondrial	6.3	no	no
um00078	chr01	200648	202822	-1	no	0.112	724	Cytoplasmic	9.9	no	no
um00079	chr01	203745	204770	-1	no	0.439	341	Membrane bound Mitochondrial	6.6	no	no
um00080	chr01	205437	207410	-1	no	0.15	657	Cytoplasmic	3	no	no
um00081	chr01	208050	208835	-1	yes	0.719	261	Membrane bound Extracellular (Secreted)	7.4	yes	yes
um00082	chr01	210802	212115	1	no	0.111	437	Nuclear	6.7	no	no
um00083	chr01	213388	214433	1	no	0.143	310	Plasma membrane	9.3	no	no
um00084	chr01	215002	218058	1	no	0.11	1018	Membrane bound Mitochondrial	6.7	no	no
um00085	chr01	218169	219494	-1	no	0.224	441	Cytoplasmic	3.1	no	no
um12086	chr01	220137	221099	1	no	0.182	320	Mitochondrial	8.6	no	no
um00087	chr01	221330	222274	-1	no	0.207	314	Membrane bound Endoplasmic reticulum	4.5	no	no
um10020	chr01	223036	225609	1	no	0.142	857	Cytoplasmic	4.5	no	no
um00089	chr01	225687	226601	-1	no	0.129	304	Membrane bound Mitochondrial	5.7	no	no
um00090	chr01	227010	227354	-1	no	0.117	114	Extracellular (Secreted)	8.3	yes	yes
um00091	chr01	227810	229180	1	no	0.101	456	Nuclear	6.4	no	no
um00092	chr01	229318	230322	-1	no	0.126	306	Membrane bound Mitochondrial	5.5	no	no
um10021	chr01	231277	232095	1	no	0.149	214	Cytoplasmic	4.8	no	no
um00094	chr01	232712	233419	-1	no	0.184	235	Cytoplasmic	4.3	no	no
um00095	chr01	234137	234922	-1	no	0.186	261	Cytoplasmic	4.3	no	no
um00096	chr01	236886	237974	1	no	0.13	362	Membrane bound Vacuolar	5	no	no
um00097	chr01	238546	240324	-1	no	0.4	592	Membrane bound Mitochondrial	6.5	no	no
um00098	chr01	241316	242893	1	yes	0.599	525	Plasma membrane	5.5	yes	yes
um00099	chr01	243762	245810	1	no	0.107	682	Nuclear	7.3	no	no
um10022	chr01	246161	247108	1	no	0.119	315	Nuclear	6.4	no	no
um00101	chr01	247689	250286	1	no	0.127	865	Nuclear	5.8	no	no
um00102	chr01	252974	253900	1	yes	0.865	308	Extracellular (Secreted)	6.3	yes	yes
um00103	chr01	254705	256252	1	no	0.121	515	Plasma membrane	8	no	no
um00104	chr01	256816	259158	-1	yes	0.916	780	Plasma membrane	3.8	yes	yes
um00105	chr01	259903	261792	-1	yes	0.772	629	Plasma membrane	9.9	yes	no
um10023	chr01	264464	266011	1	no	0.297	486	Membrane bound Peroxisomal	8.6	no	no
um10024	chr01	266319	267453	-1	yes	0.715	271	Membrane bound Endoplasmic reticulum	7.5	yes	yes
um00108	chr01	267887	269008	-1	no	0.17	373	Membrane bound Mitochondrial	6.2	no	no
um00109	chr01	271122	273113	1	no	0.111	616	Cytoplasmic	7.7	no	no
um10025	chr01	274489	276264	1	no	0.105	591	Nuclear	3.6	no	no
um00111	chr01	276457	277272	-1	no	0.201	244	Membrane bound Peroxisomal	8.3	no	no
um10027	chr01	278780	280689	1	no	0.111	535	Mitochondrial	4	no	no
um00113	chr01	283161	286574	1	no	0.133	1077	Cytoplasmic	3.3	no	no
um00114	chr01	286777	288150	-1	no	0.143	457	Nuclear	9.9	no	no
um00115	chr01	289079	290305	1	no	0.137	408	Membrane bound Mitochondrial	8.3	no	no
um00116	chr01	290483	292156	-1	no	0.102	557	Membrane bound Endoplasmic reticulum	3.4	no	no
um00117	chr01	293126	295165	-1	no	0.121	679	Membrane bound Peroxisomal	5.3	no	no
um00118	chr01	296360	297865	1	no	0.108	501	Membrane bound Mitochondrial	2.9	no	no
um00119	chr01	298091	299896	-1	no	0.196	601	Plasma membrane	3.5	no	no
um00120	chr01	300671	301957	1	no	0.202	428	Membrane bound Mitochondrial	9.1	no	no
um10028	chr01	302439	303080	1	no	0.101	186	Membrane bound Extracellular (Secreted)	9.1	no	no
um00122	chr01	303191	305140	-1	no	0.144	649	Membrane bound Mitochondrial	7.6	no	no
um00123	chr01	305715	307466	-1	no	0.153	583	Membrane bound Mitochondrial	9.7	no	no
um00124	chr01	308669	310060	-1	no	0.125	463	Nuclear	4.4	no	no
um00125	chr01	311634	312611	1	no	0.117	325	Nuclear	5.1	no	no
um00126	chr01	313286	314863	1	no	0.182	525	Cytoplasmic	2.7	no	no
um00127	chr01	315057	317042	-1	no	0.138	661	Nuclear	5.9	no	no
um10029	chr01	319709	321301	1	no	0.103	530	Mitochondrial	6.3	no	no
um12082	chr01	321611	322628	1	no	0.108	312	Cytoplasmic	6.9	no	no
um10030	chr01	322735	324276	-1	yes	0.679	513	Extracellular (Secreted)	2.8	yes	yes
um00130	chr01	325006	325855	1	no	0.173	240	Cytoplasmic	10	no	no
um00131	chr01	326034	327302	-1	no	0.265	422	Membrane bound Mitochondrial	9.1	no	no
um00132	chr01	331733	333253	1	no	0.266	506	Nuclear	5.4	no	no
um00133	chr01	335016	337746	-1	no	0.112	716	Membrane bound Extracellular (Secreted)	2.7	no	no
um10031	chr01	338391	340727	-1	no	0.248	778	Mitochondrial	7.8	no	no
um10032	chr01	341722	342594	1	no	0.145	263	Nuclear	4	no	no
um00136	chr01	342639	344801	-1	no	0.103	720	Nuclear	7.5	no	no
um00137	chr01	345241	347301	1	no	0.156	686	Nuclear	5.3	no	no
um00138	chr01	347638	349050	-1	no	0.182	470	Mitochondrial	10	no	no
um10033	chr01	350096	352960	1	no	0.102	954	Nuclear	9.9	no	no
um00140	chr01	353257	354351	-1	no	0.223	364	Membrane bound Mitochondrial	4.3	no	no
um00141	chr01	354978	359006	1	no	0.105	1342	Cytoplasmic	4.3	no	no
um10034	chr01	359540	359875	-1	no	0.159	78	Membrane bound Mitochondrial	8.5	no	no
um10035	chr01	360266	361000	1	no	0.112	95	Membrane bound Mitochondrial	4.7	no	no
um00144	chr01	363556	365067	1	yes	0.712	503	Membrane bound Extracellular (Secreted)	9.4	yes	no
um00145-B	chr01	365397	367659	-1	no	0.11	668	Membrane bound Mitochondrial	6.1	no	no
um00145-A	chr01	366184	367659	-1	no	0.11	491	Nuclear	4.7	no	no
um00146	chr01	368429	369100	-1	no	0.102	223	Cytoplasmic	3.8	no	no
um10036	chr01	369720	372149	-1	no	0.181	733	Membrane bound Golgi	8.3	no	no
um10037	chr01	372607	373262	1	no	0.12	52	Membrane bound Mitochondrial	9.9	no	no
um00148	chr01	373677	376050	1	no	0.113	724	Cytoplasmic	4.1	no	no
um00149	chr01	378002	383758	1	no	0.108	1918	Cytoplasmic	3.9	no	no
um10038	chr01	385809	388862	1	no	0.133	911	Membrane bound Peroxisomal	6.7	no	no
um10039	chr01	389889	391796	1	no	0.16	635	Membrane bound Mitochondrial	6.4	no	no
um00152	chr01	392089	394305	-1	no	0.105	738	Nuclear	5.8	no	no
um00153	chr01	395216	395831	1	no	0.183	119	Membrane bound Mitochondrial	4.3	no	no
um00154	chr01	396166	398259	-1	yes	0.806	697	Plasma membrane	3.1	yes	yes
um10040	chr01	400368	401446	1	no	0.13	293	Nuclear	4.1	no	no
um00156	chr01	401587	402537	-1	no	0.103	316	Membrane bound Mitochondrial	9.5	no	no
um00157	chr01	403867	405453	1	no	0.112	528	Cytoplasmic	5.8	no	no
um12090	chr01	407503	408588	1	no	0.116	361	Membrane bound Endoplasmic reticulum	9.9	no	no
um00159	chr01	409090	410061	-1	yes	0.692	323	Membrane bound Mitochondrial	5.2	yes	yes
um00160	chr01	410545	411498	1	no	0.104	288	Plasma membrane	9.7	no	no
um00161	chr01	411716	413488	-1	no	0.136	590	Nuclear	7.1	no	no
um10041	chr01	414406	415267	-1	no	0.104	258	Cytoplasmic	3.6	no	no
um00163	chr01	415614	416411	1	no	0.216	265	Cytoplasmic	8.9	no	no
um00164	chr01	417319	419378	-1	no	0.109	652	Nuclear	6.3	no	no
um10042	chr01	419880	421490	1	no	0.256	536	Membrane bound Peroxisomal	4.3	no	no
um00166	chr01	421559	422674	-1	no	0.144	371	Nuclear	2.4	no	no
um00167	chr01	424175	426190	1	no	0.118	671	Membrane bound Mitochondrial	3.5	no	no
um00168	chr01	426376	429663	-1	no	0.109	1095	Cytoplasmic	4.4	no	no
um00169	chr01	431014	432438	1	no	0.131	439	Cytoplasmic	9.9	no	no
um10043	chr01	432537	434012	-1	no	0.1	491	Nuclear	5.2	no	no
um10044	chr01	434323	436454	-1	no	0.126	631	Cytoplasmic	9.8	no	no
um10045	chr01	437636	437923	-1	no	0.121	95	Mitochondrial	8.7	no	no
um00171	chr01	438543	439145	1	no	0.463	200	Extracellular (Secreted)	3.9	yes	no
um00172	chr01	439676	441619	1	no	0.236	647	Membrane bound Mitochondrial	6.6	no	no
um10046	chr01	442308	444236	1	no	0.119	642	Membrane bound Endoplasmic reticulum	4.6	no	no
um12091	chr01	444376	444892	-1	no	0.151	149	Membrane bound Extracellular (Secreted)	7.3	no	no
um00174	chr01	445424	450595	-1	no	0.106	1723	Nuclear	2.9	no	no
um00175	chr01	451860	452765	1	no	0.145	301	Cytoplasmic	10	no	no
um00176	chr01	453729	455747	1	no	0.116	672	Membrane bound Endoplasmic reticulum	9.5	no	no
um00177	chr01	456540	457829	1	no	0.163	429	Membrane bound Peroxisomal	8.7	no	no
um10047	chr01	458104	460038	-1	no	0.104	644	Nuclear	9.9	no	no
um00179	chr01	460618	462051	1	no	0.109	477	Cytoplasmic	5.7	no	no
um00180	chr01	462925	464430	1	no	0.114	501	Membrane bound Mitochondrial	6.9	no	no
um00181	chr01	464725	468642	-1	no	0.112	1305	Plasma membrane	4.1	no	no
um00182	chr01	472261	474018	1	yes	0.889	585	Membrane bound Mitochondrial	6.6	yes	yes
um00183	chr01	474184	475902	-1	no	0.123	572	Membrane bound Golgi	7.6	no	no
um00184	chr01	476520	477875	-1	no	0.102	451	Nuclear	5.8	no	no
um10048	chr01	478466	479160	1	no	0.144	78	Membrane bound Extracellular (Secreted)	4.3	no	no
um10049	chr01	479532	483827	-1	no	0.104	1431	Plasma membrane	4.8	no	no
um00187	chr01	484990	485562	1	yes	0.598	110	Mitochondrial	3.1	yes	yes
um00188	chr01	486892	487776	1	no	0.104	294	Nuclear	6.4	no	no
um00189	chr01	488543	491236	1	no	0.101	897	Nuclear	6.8	no	no
um10050	chr01	491557	492201	-1	no	0.27	103	Nuclear	9.4	no	no
um00191	chr01	492525	493544	1	no	0.11	339	Cytoplasmic	5.5	no	no
um00192	chr01	493767	495365	-1	no	0.164	532	Membrane bound Endoplasmic reticulum	7.8	no	no
um00193	chr01	497790	499871	1	no	0.126	693	Membrane bound Peroxisomal	3.9	no	no
um00194	chr01	501253	502290	-1	no	0.119	296	Nuclear	4.8	no	no
um00195	chr01	502844	506092	1	no	0.133	1082	Nuclear	3.5	no	no
um00196	chr01	506631	507347	-1	no	0.11	238	Plasma membrane	9.1	no	no
um00197	chr01	509409	513191	-1	no	0.118	1260	Plasma membrane	2.7	no	no
um10051	chr01	515586	515969	-1	no	0.101	127	Cytoplasmic	9.7	no	no
um00199	chr01	517856	519067	-1	no	0.163	403	Cytoplasmic	9.9	no	no
um10052	chr01	521324	524332	1	yes	0.75	1002	Plasma membrane	6.6	yes	yes
um10053	chr01	525512	526357	1	no	0.14	281	Membrane bound Mitochondrial	5.4	no	no
um00202	chr01	526620	528413	-1	no	0.299	597	Membrane bound Mitochondrial	8.3	no	no
um00203	chr01	529385	530655	-1	no	0.12	395	Nuclear	3.2	no	no
um00204	chr01	532099	535476	1	no	0.109	1125	Plasma membrane	9.5	no	no
um00205	chr01	536927	537265	1	no	0.103	80	Extracellular (Secreted)	6.8	yes	no
um00206	chr01	537574	539985	-1	no	0.116	699	Plasma membrane	5.1	no	no
um00207	chr01	540599	542323	1	no	0.114	574	Membrane bound Mitochondrial	8.7	no	no
um00208	chr01	542645	545023	-1	no	0.109	792	Plasma membrane	4.2	no	no
um00209	chr01	546270	546845	1	no	0.108	191	Nuclear	3.9	no	no
um00210	chr01	547120	548400	-1	no	0.299	426	Membrane bound Mitochondrial	7.4	no	no
um10054	chr01	549461	550396	1	no	0.161	312	Nuclear	4.3	no	no
um12147	chr01	550930	551834	-1	no	0.149	211	Membrane bound Mitochondrial	7.2	no	no
um00211	chr01	552495	553289	1	no	0.105	235	Nuclear	8.2	no	no
um00212	chr01	553527	556352	-1	no	0.104	941	Nuclear	5.8	no	no
um00213	chr01	557466	559685	-1	no	0.11	739	Membrane bound Lysosomal	3.9	no	no
um11420	chr01	561310	561804	1	no	0.127	164	Membrane bound Mitochondrial	5.5	no	no
um11421	chr01	562745	564442	1	no	0.148	565	Membrane bound Mitochondrial	9.9	no	no
um00215	chr01	564589	566223	-1	no	0.103	544	Membrane bound Mitochondrial	6.5	no	no
um00216	chr01	566776	567930	-1	no	0.105	384	Mitochondrial	6.9	no	no
um11422	chr01	568949	571789	1	no	0.122	946	Nuclear	5.4	no	no
um00218	chr01	571935	573845	-1	no	0.102	636	Nuclear	10	no	no
um00219	chr01	574495	576588	-1	no	0.102	697	Plasma membrane	8.2	no	no
um11423	chr01	579094	579460	-1	no	0.103	53	Nuclear	4.2	no	no
um00221	chr01	580032	580823	-1	no	0.254	263	Plasma membrane	9.3	no	no
um00222	chr01	582130	583662	-1	no	0.113	510	Plasma membrane	7.8	no	no
um00223	chr01	586256	587602	1	no	0.099	420	Membrane bound Mitochondrial	4.9	no	no
um00224	chr01	588150	588905	1	no	0.145	251	Cytoplasmic	3	no	no
um00225	chr01	589044	592088	-1	no	0.104	1014	Nuclear	4.2	no	no
um00226	chr01	592847	593901	1	no	0.113	317	Nuclear	5.3	no	no
um00227	chr01	594150	597320	-1	no	0.11	1056	Plasma membrane	5.5	no	no
um00229	chr01	600347	601291	1	no	0.109	314	Nuclear	5.4	no	no
um00230	chr01	603800	604951	1	no	0.107	383	Nuclear	5.7	no	no
um11424	chr01	605164	606807	-1	no	0.224	547	Membrane bound Mitochondrial	2.6	no	no
um11425	chr01	607290	608456	-1	no	0.276	388	Membrane bound Mitochondrial	7.7	no	no
um11426	chr01	609546	610736	1	no	0.125	396	Cytoplasmic	9.7	no	no
um00233	chr01	610878	612557	-1	no	0.124	559	Nuclear	6.7	no	no
um11427	chr01	613186	614163	1	no	0.114	325	Nuclear	5.6	no	no
um00235	chr01	614673	616172	-1	yes	0.682	461	Membrane bound Extracellular (Secreted)	9.8	yes	no
um00236	chr01	618079	618450	-1	no	0.225	123	Membrane bound Peroxisomal	3.9	no	no
um11428	chr01	619624	622908	1	no	0.1	1094	Cytoplasmic	9.9	no	no
um00238	chr01	625530	630008	1	no	0.119	1492	Cytoplasmic	8	no	no
um00239	chr01	630709	635685	-1	no	0.1	1658	Nuclear	5.1	no	no
um11429	chr01	636644	636904	-1	no	0.126	86	Mitochondrial	4.9	no	no
um00240	chr01	637566	640664	1	no	0.133	1032	Membrane bound Mitochondrial	7.3	no	no
um00241	chr01	641004	642101	-1	no	0.105	365	Nuclear	4.8	no	no
um00242	chr01	642920	645793	-1	no	0.103	957	Nuclear	4.4	no	no
um10955	chr01	646169	646797	1	no	0.107	174	Nuclear	4.2	no	no
um00244	chr01	648642	649691	1	no	0.102	349	Membrane bound Extracellular (Secreted)	7.4	no	no
um00245	chr01	650038	651330	-1	no	0.258	338	Membrane bound Mitochondrial	9.7	no	no
um10956	chr01	652154	653509	1	no	0.167	109	Cytoplasmic	9.1	no	no
um00247	chr01	654126	655934	-1	no	0.14	602	Membrane bound Mitochondrial	2.5	no	no
um10957	chr01	656504	658122	-1	no	0.151	511	Plasma membrane	9.5	no	no
um10958	chr01	658596	660788	-1	no	0.115	673	Mitochondrial	8.9	no	no
um00249	chr01	662219	664882	1	no	0.101	887	Membrane bound Extracellular (Secreted)	3	no	no
um00250	chr01	665460	666486	-1	yes	0.748	314	Nuclear	5.2	yes	yes
um00251	chr01	668740	670653	-1	no	0.1	637	Membrane bound Mitochondrial	2.4	no	no
um10959	chr01	671810	672651	1	no	0.159	207	Cytoplasmic	7.8	no	no
um10960	chr01	674606	675334	-1	no	0.126	242	Membrane bound Extracellular (Secreted)	8.8	no	no
um00254	chr01	678527	679894	-1	no	0.154	363	Cytoplasmic	5.1	no	no
um00255	chr01	681080	682996	1	no	0.154	638	Nuclear	3.9	no	no
um00256	chr01	683839	684978	1	no	0.117	268	Membrane bound Mitochondrial	3.3	no	no
um12148	chr01	685095	688391	-1	yes	0.734	1040	Membrane bound Mitochondrial	6.7	yes	yes
um00258	chr01	689214	690914	1	no	0.104	566	Membrane bound Golgi	4.9	no	no
um00259	chr01	691213	692913	-1	no	0.31	566	Cytoplasmic	10	no	no
um10961	chr01	693343	694135	1	no	0.148	165	Mitochondrial	9.3	no	no
um10962	chr01	694672	695273	1	no	0.108	144	Nuclear	2.5	no	no
um00262	chr01	697826	699025	1	no	0.204	367	Membrane bound Golgi	9.5	no	no
um00263	chr01	699938	701290	1	no	0.103	450	Membrane bound Mitochondrial	9.3	no	no
um10963	chr01	701593	702330	-1	no	0.213	245	Mitochondrial	5.2	no	no
um00264	chr01	702740	705250	-1	no	0.133	836	Nuclear	7.2	no	no
um00265	chr01	706382	707407	-1	no	0.433	341	Membrane bound Mitochondrial	9.3	no	no
um00266	chr01	708264	709136	-1	no	0.103	290	Nuclear	5	no	no
um10964	chr01	709682	710836	1	no	0.145	384	Membrane bound Peroxisomal	9.3	no	no
um10965	chr01	710936	712567	-1	no	0.143	543	Nuclear	5.4	no	no
um10966	chr01	713246	717325	-1	no	0.109	1359	Cytoplasmic	6.1	no	no
um00270	chr01	719601	722294	1	no	0.178	897	Cytoplasmic	5.1	no	no
um00271	chr01	723431	724984	1	yes	0.751	517	Membrane bound Mitochondrial	2.2	yes	yes
um00272	chr01	726081	728150	1	no	0.108	689	Plasma membrane	7.6	no	no
um00273	chr01	728445	728867	-1	no	0.337	140	Extracellular (Secreted)	5.7	yes	no
um00274	chr01	729934	731364	-1	no	0.108	476	Cytoplasmic	9.5	no	no
um00275	chr01	733808	737551	-1	no	0.14	1247	Membrane bound Vacuolar	3.5	no	no
um00276	chr01	738799	739260	1	no	0.122	139	Membrane bound Extracellular (Secreted)	8.6	no	no
um00277	chr01	742635	745592	1	no	0.164	985	Nuclear	4	no	no
um00278	chr01	746811	747188	-1	no	0.309	125	Extracellular (Secreted)	9.6	yes	yes
um10085	chr01	747804	749741	-1	no	0.104	645	Nuclear	4.9	no	no
um10086	chr01	750514	753900	-1	no	0.21	1128	Cytoplasmic	3.8	no	no
um00280	chr01	754463	755857	1	yes	0.535	464	Plasma membrane	4.9	yes	yes
um10087	chr01	756197	759771	-1	no	0.099	1157	Nuclear	5.7	no	no
um00282	chr01	762662	768550	1	no	0.15	1962	Cytoplasmic	7.6	no	no
um00283	chr01	769187	770380	1	no	0.211	397	Membrane bound Peroxisomal	8.6	no	no
um00284	chr01	770536	771165	-1	no	0.286	209	Endoplasmic reticulum	6.6	no	no
um10088	chr01	771925	774305	1	no	0.108	742	Cytoplasmic	9.4	no	no
um00286	chr01	778697	780829	1	no	0.137	710	Nuclear	5.9	no	no
um10089	chr01	781400	784395	-1	no	0.122	878	Membrane bound Mitochondrial	6.2	no	no
um00288	chr01	784908	786362	-1	no	0.156	484	Membrane bound Mitochondrial	9.5	no	no
um00289	chr01	786841	789255	-1	no	0.139	804	Cytoplasmic	5.6	no	no
um00290	chr01	790047	793667	-1	no	0.115	1206	Cytoplasmic	5.1	no	no
um00291	chr01	795219	796844	1	no	0.119	541	Nuclear	5.8	no	no
um00292	chr01	797038	798804	-1	no	0.136	588	Nuclear	5.5	no	no
um00293	chr01	799360	800625	1	no	0.106	421	Nuclear	9.5	no	no
um10091	chr01	800819	802780	-1	yes	0.781	653	Membrane bound Extracellular (Secreted)	5.1	yes	yes
um00295	chr01	804086	804661	-1	no	0.146	191	Plasma membrane	9.7	no	no
um00296	chr01	808858	810687	1	no	0.117	609	Nuclear	5.9	no	no
um00297	chr01	811492	812835	1	no	0.115	447	Membrane bound Peroxisomal	4.2	no	no
um00298	chr01	813048	815630	-1	no	0.158	860	Nuclear	3.6	no	no
um00299	chr01	816421	819051	-1	yes	0.636	876	Membrane bound Mitochondrial	3.7	yes	yes
um00300	chr01	820644	824003	1	no	0.104	1119	Nuclear	4.4	no	no
um10092	chr01	824120	826006	-1	no	0.116	628	Membrane bound Mitochondrial	7.3	no	no
um00302	chr01	826477	827379	-1	no	0.223	300	Plasma membrane	5.6	no	no
um12149	chr01	829642	832068	1	no	0.111	808	Nuclear	6.5	no	no
um00304	chr01	832331	833866	-1	no	0.125	511	Cytoplasmic	5.2	no	no
um00305	chr01	835024	837153	1	no	0.105	709	Nuclear	4	no	no
um00306	chr01	838499	838999	1	no	0.103	166	Membrane bound Mitochondrial	6.3	no	no
um10093	chr01	839756	840427	1	no	0.125	223	Nuclear	3.7	no	no
um00308	chr01	840538	842196	-1	no	0.173	552	Nuclear	4.3	no	no
um00309	chr01	844027	845301	1	yes	0.916	424	Extracellular (Secreted)	7.9	yes	yes
um00310	chr01	845549	847312	-1	no	0.348	587	Membrane bound Mitochondrial	7	no	no
um00311	chr01	848518	850422	1	no	0.12	634	Membrane bound Mitochondrial	6.6	no	no
um10094	chr01	850813	853083	-1	no	0.095	756	Cytoplasmic	3.8	no	no
um10095	chr01	854517	857882	-1	no	0.095	552	Cytoplasmic	9.6	no	no
um00315	chr01	859198	860508	1	no	0.16	436	Membrane bound Mitochondrial	9.9	no	no
um00316	chr01	860973	864431	-1	no	0.123	1152	Nuclear	4.2	no	no
um00317	chr01	869777	870976	-1	no	0.131	399	Cytoplasmic	3.2	no	no
um00318	chr01	873372	874319	-1	no	0.099	315	Nuclear	9.8	no	no
um00319	chr01	874883	875965	1	no	0.104	360	Cytoplasmic	3.2	no	no
um10097	chr01	876334	877803	-1	no	0.102	255	Nuclear	5.2	no	no
um00321	chr01	879070	880938	1	no	0.1	622	Nuclear	9.9	no	no
um00322	chr01	881378	883576	-1	no	0.102	732	Plasma membrane	5.6	no	no
um10098	chr01	884503	893391	1	no	0.107	2962	Membrane bound Mitochondrial	5.4	no	no
um12150	chr01	893944	894651	1	no	0.107	235	Membrane bound Mitochondrial	9.8	no	no
um00326	chr01	897996	898898	1	yes	0.784	300	Mitochondrial	4.4	yes	yes
um10099	chr01	899510	900565	1	yes	0.873	351	Membrane bound Endoplasmic reticulum	6.3	yes	yes
um00328	chr01	900777	903632	-1	no	0.168	951	Nuclear	3.7	no	no
um00329	chr01	904295	907696	1	no	0.13	1133	Cytoplasmic	7.3	no	no
um00330	chr01	907917	909186	-1	yes	0.906	352	Plasma membrane	9.9	yes	no
um10100	chr01	910228	911073	1	no	0.109	215	Nuclear	3.3	no	no
um10101	chr01	911500	913332	1	no	0.15	610	Nuclear	5.9	no	no
um00332	chr01	913473	917327	-1	no	0.113	1284	Cytoplasmic	3.8	no	no
um00333	chr01	917702	921010	1	no	0.12	1102	Nuclear	2.9	no	no
um00334	chr01	921278	922494	-1	no	0.1	373	Nuclear	3.2	no	no
um10102	chr01	923688	925952	1	no	0.198	754	Cytoplasmic	9.5	no	no
um00336	chr01	926260	926787	-1	no	0.145	175	Nuclear	5.7	no	no
um00337	chr01	928017	929033	1	no	0.198	208	Mitochondrial	3.9	no	no
um00338	chr01	929107	934848	-1	no	0.112	1913	Membrane bound Vacuolar	9.2	no	no
um11340	chr01	935543	936154	1	no	0.119	172	Nuclear	6	no	no
um00340	chr01	936305	937498	-1	no	0.112	397	Membrane bound Mitochondrial	5.1	no	no
um11341	chr01	937960	939867	1	yes	0.643	635	Plasma membrane	3.5	yes	yes
um11342	chr01	940078	941127	1	no	0.104	349	Nuclear	10	no	no
um11343	chr01	941228	941869	-1	no	0.107	181	Cytoplasmic	3.9	no	no
um00342	chr01	942325	945909	1	no	0.111	1194	Nuclear	5.1	no	no
um00343	chr01	946749	948449	-1	no	0.103	566	Plasma membrane	8.8	no	no
um00344	chr01	952247	954166	-1	no	0.452	639	Mitochondrial	7.1	no	no
um11344	chr01	954679	955623	1	no	0.1	314	Mitochondrial	5.1	no	no
um11345	chr01	955712	956587	-1	no	0.106	291	Nuclear	3.8	no	no
um00347	chr01	957004	960678	1	no	0.133	1224	Nuclear	4.5	no	no
um11346	chr01	960819	965174	-1	no	0.107	1451	Plasma membrane	3.9	no	no
um00349	chr01	966873	967643	1	no	0.113	219	Nuclear	5.1	no	no
um00350	chr01	967876	969939	-1	no	0.111	556	Membrane bound Mitochondrial	3.7	no	no
um11347	chr01	972233	973957	-1	no	0.313	574	Membrane bound Endoplasmic reticulum	9.6	no	no
um11348	chr01	974831	977251	1	no	0.177	806	Cytoplasmic	3.9	no	no
um00353	chr01	977212	978600	-1	no	0.107	462	Cytoplasmic	2.5	no	no
um00354	chr01	978963	981659	-1	no	0.163	898	Cytoplasmic	6.2	no	no
um00355	chr01	982324	985257	1	no	0.138	977	Mitochondrial	6.3	no	no
um00356	chr01	985386	989363	-1	no	0.126	1325	Plasma membrane	4.7	no	no
um00357	chr01	991647	992777	1	no	0.175	376	Membrane bound Endoplasmic reticulum	4.5	no	no
um00358	chr01	994675	995130	-1	no	0.11	75	Nuclear	4	no	no
um11349	chr01	995244	996566	1	no	0.266	252	Plasma membrane	7.1	no	no
um00360	chr01	997001	1001380	-1	no	0.135	1459	Membrane bound Mitochondrial	3.2	no	no
um00361	chr01	1002865	1005510	1	no	0.107	881	Plasma membrane	3.6	no	no
um00362	chr01	1005697	1007088	-1	no	0.119	463	Membrane bound Peroxisomal	5.5	no	no
um11350	chr01	1007731	1011555	1	no	0.106	1136	Nuclear	2.1	no	no
um00364	chr01	1011922	1013721	-1	no	0.105	599	Nuclear	8.8	no	no
um00365	chr01	1014043	1014543	1	no	0.236	166	Mitochondrial	5.1	no	no
um00366	chr01	1015714	1018656	1	no	0.116	980	Cytoplasmic	7.8	no	no
um11352	chr01	1019518	1022112	1	no	0.104	864	Membrane bound Extracellular (Secreted)	6.5	no	no
um11353	chr01	1022312	1023592	-1	no	0.163	426	Membrane bound Mitochondrial	10	no	no
um00369	chr01	1024293	1025363	1	no	0.107	356	Nuclear	7.9	no	no
um00370	chr01	1026390	1031813	1	no	0.135	1807	Plasma membrane	5.4	no	no
um11354	chr01	1031993	1032514	-1	no	0.11	173	Cytoplasmic	5.3	no	no
um00371	chr01	1033958	1034949	1	no	0.099	292	Plasma membrane	5.9	no	no
um00372	chr01	1035555	1039289	-1	no	0.192	1244	Plasma membrane	7.5	no	no
um11355	chr01	1039870	1040301	1	no	0.109	79	Cytoplasmic	9.4	no	no
um00374	chr01	1042395	1043954	1	no	0.101	519	Plasma membrane	6.2	no	no
um00375	chr01	1044277	1048077	-1	no	0.106	1266	Plasma membrane	8.1	no	no
um00376	chr01	1049918	1053118	-1	no	0.159	1066	Nuclear	4.7	no	no
um15041	chr01	1055351	1058493	1	no	0.11	885	Nuclear	4.3	no	no
um00378	chr01	1058677	1060629	-1	no	0.114	610	Plasma membrane	4.7	no	no
um00379	chr01	1061747	1063372	-1	no	0.127	541	Cytoplasmic	10	no	no
um00380	chr01	1064086	1065429	1	no	0.127	447	Nuclear	2.9	no	no
um00381	chr01	1065865	1067223	1	no	0.149	392	Membrane bound Mitochondrial	9.5	no	no
um11604	chr01	1068311	1070179	1	no	0.105	622	Membrane bound Endoplasmic reticulum	5.3	no	no
um11605	chr01	1070279	1071400	-1	no	0.101	373	Cytoplasmic	7.1	no	no
um11606	chr01	1071798	1072670	-1	no	0.117	290	Cytoplasmic	2.5	no	no
um00384	chr01	1076317	1078182	-1	no	0.143	621	Membrane bound Mitochondrial	2.9	no	no
um00385	chr01	1082518	1085541	1	no	0.107	1007	Nuclear	5.3	no	no
um00386	chr01	1085894	1087684	-1	no	0.113	559	Cytoplasmic	3.6	no	no
um00387	chr01	1089191	1090251	-1	no	0.158	181	Golgi	10	no	no
um00388	chr01	1092931	1094541	1	no	0.113	536	Nuclear	6.3	no	no
um00389	chr01	1096151	1098460	1	no	0.103	769	Nuclear	5.6	no	no
um00390	chr01	1098970	1100007	-1	no	0.101	345	Nuclear	5.6	no	no
um00391	chr01	1100941	1102094	1	no	0.151	325	Membrane bound Mitochondrial	4.2	no	no
um00392	chr01	1102230	1102784	-1	no	0.108	130	Cytoplasmic	2.5	no	no
um00393	chr01	1103193	1107098	1	no	0.1	1301	Cytoplasmic	9	no	no
um00394	chr01	1107355	1109157	-1	no	0.105	600	Nuclear	5.2	no	no
um00395	chr01	1109830	1111020	-1	yes	0.583	396	Membrane bound Lysosomal	3.3	yes	yes
um11608	chr01	1113076	1114519	1	no	0.102	364	Nuclear	5.5	no	no
um00397	chr01	1114689	1115126	-1	no	0.1	145	Cytoplasmic	6.3	no	no
um11610	chr01	1116256	1117335	1	no	0.104	287	Membrane bound Peroxisomal	2.7	no	no
um00399	chr01	1118392	1121223	1	no	0.102	943	Nuclear	6.5	no	no
um00400	chr01	1122934	1127037	1	no	0.132	1367	Nuclear	3.6	no	no
um15058	chr01	1128006	1130780	1	no	0.101	890	Nuclear	3.3	no	no
um00403	chr01	1131105	1132139	-1	no	0.176	344	Membrane bound Mitochondrial	8.1	no	no
um11821	chr01	1133616	1135303	1	no	0.103	279	Membrane bound Endoplasmic reticulum	4.2	no	no
um00405	chr01	1138788	1141610	1	no	0.108	940	Nuclear	4.4	no	no
um00406	chr01	1142502	1143151	1	no	0.156	155	Membrane bound Mitochondrial	7.5	no	no
um00407	chr01	1143289	1144368	-1	no	0.119	359	Membrane bound Mitochondrial	9.6	no	no
um11822	chr01	1144885	1145492	1	no	0.211	164	Mitochondrial	9.9	no	no
um11823	chr01	1146066	1146668	1	no	0.252	200	Nuclear	2.1	no	no
um11824	chr01	1146944	1150645	-1	no	0.117	1233	Cytoplasmic	4.9	no	no
um00410	chr01	1153579	1154577	1	no	0.16	332	Cytoplasmic	8.1	no	no
um00411	chr01	1154766	1156122	-1	yes	0.542	423	Extracellular (Secreted)	3.9	yes	yes
um00412	chr01	1158260	1159711	1	no	0.12	483	Membrane bound Mitochondrial	3.9	no	no
um10103	chr01	1160066	1164034	-1	no	0.104	1323	Cytoplasmic	5.7	no	no
um10104	chr01	1165282	1166535	-1	no	0.117	306	Cytoplasmic	9.4	no	no
um00414	chr01	1170179	1173562	1	no	0.127	1127	Nuclear	5.3	no	no
um00415	chr01	1174750	1179708	1	no	0.113	1652	Cytoplasmic	5	no	no
um10105	chr01	1179906	1181909	-1	no	0.147	667	Membrane bound Mitochondrial	8.1	no	no
um10106	chr01	1182254	1185892	-1	no	0.159	1212	Membrane bound Mitochondrial	6.5	no	no
um00417	chr01	1186661	1187506	1	no	0.121	281	Membrane bound Mitochondrial	3.1	no	no
um00418	chr01	1188256	1189404	1	no	0.107	382	Membrane bound Mitochondrial	5.8	no	no
um00419	chr01	1189582	1192410	-1	no	0.101	942	Membrane bound Mitochondrial	7.9	no	no
um00420	chr01	1193451	1193954	1	yes	0.614	167	Extracellular (Secreted)	7.1	yes	yes
um10107	chr01	1194773	1196113	1	no	0.147	446	Cytoplasmic	9.8	no	no
um00422	chr01	1196271	1197281	-1	no	0.116	336	Membrane bound Mitochondrial	6.7	no	no
um00423	chr01	1197844	1198995	1	no	0.172	383	Membrane bound Mitochondrial	7.1	no	no
um00424	chr01	1199233	1201026	-1	no	0.101	597	Cytoplasmic	2.8	no	no
um10108	chr01	1202062	1203081	-1	no	0.126	339	Membrane bound Golgi	5.3	no	no
um10109	chr01	1203191	1204054	-1	no	0.12	287	Extracellular (Secreted)	4.5	yes	no
um10110	chr01	1204760	1206111	1	no	0.132	113	Cytoplasmic	9.2	no	no
um00427	chr01	1206511	1210074	-1	no	0.103	1187	Nuclear	6.4	no	no
um00428	chr01	1212755	1213639	1	no	0.108	294	Cytoplasmic	4.6	no	no
um00429	chr01	1213801	1215645	-1	no	0.102	614	Cytoplasmic	10	no	no
um00430	chr01	1216676	1218040	-1	no	0.176	454	Membrane bound Mitochondrial	9.9	no	no
um10112	chr01	1218878	1219858	1	no	0.137	326	Nuclear	8.1	no	no
um00432	chr01	1221172	1222227	1	no	0.103	351	Cytoplasmic	4.3	no	no
um10113	chr01	1222351	1224642	-1	no	0.103	701	Nuclear	6.7	no	no
um12151	chr01	1225702	1231215	1	no	0.113	1837	Membrane bound Endoplasmic reticulum	2.6	no	no
um00435	chr01	1231759	1233075	-1	no	0.3	438	Nuclear	4.5	no	no
um10114	chr01	1234089	1235097	1	no	0.105	142	Cytoplasmic	6	no	no
um12152	chr01	1237246	1241148	1	no	0.156	1300	Membrane bound Vacuolar	6.6	no	no
um00438	chr01	1241468	1241899	-1	no	0.348	143	Peroxisomal	3.7	no	no
um00439	chr01	1242523	1243494	1	no	0.101	323	Plasma membrane	3.8	no	no
um00440	chr01	1243687	1244655	-1	no	0.114	322	Membrane bound Mitochondrial	6.7	no	no
um00441	chr01	1245593	1247257	-1	no	0.103	517	Cytoplasmic	3.8	no	no
um00442	chr01	1249207	1251864	1	no	0.211	885	Cytoplasmic	3.5	no	no
um00443	chr01	1252372	1254378	1	no	0.102	668	Cytoplasmic	4.4	no	no
um00444	chr01	1254523	1256136	-1	no	0.123	537	Membrane bound Mitochondrial	7.1	no	no
um10115	chr01	1257566	1257926	1	yes	0.827	83	Peroxisomal	4.3	yes	yes
um00445	chr01	1259236	1259910	-1	yes	0.913	224	Membrane bound Extracellular (Secreted)	3.7	yes	yes
um00446	chr01	1263238	1265697	1	yes	0.698	819	Membrane bound Extracellular (Secreted)	7.6	yes	yes
um00447	chr01	1266514	1268325	1	no	0.129	603	Nuclear	6.4	no	no
um00448	chr01	1269089	1271818	-1	no	0.129	909	Cytoplasmic	8	no	no
um00450	chr01	1276222	1281675	-1	no	0.168	1817	Plasma membrane	5.8	no	no
um00451	chr01	1283146	1283868	-1	no	0.13	240	Cytoplasmic	4.7	no	no
um12153	chr01	1284260	1285189	1	no	0.178	309	Mitochondrial	3.7	no	no
um00453	chr01	1285297	1288224	-1	no	0.117	975	Nuclear	4.2	no	no
um00454	chr01	1288793	1292125	-1	no	0.105	1110	Membrane bound Endoplasmic reticulum	9.9	no	no
um00455	chr01	1292563	1293633	-1	no	0.103	356	Membrane bound Mitochondrial	9.5	no	no
um10116	chr01	1295100	1298294	1	no	0.115	1064	Cytoplasmic	2.9	no	no
um12154	chr01	1298420	1303102	-1	no	0.111	1560	Cytoplasmic	8.8	no	no
um00458	chr01	1303799	1304722	1	no	0.113	307	Membrane bound Lysosomal	7.4	no	no
um00459	chr01	1304926	1308054	-1	no	0.123	1042	Membrane bound Golgi	8.7	no	no
um00460	chr01	1308656	1309795	1	no	0.11	379	Nuclear	2.9	no	no
um00461	chr01	1310893	1313931	1	no	0.111	1012	Cytoplasmic	3.4	no	no
um10117	chr01	1314983	1317811	1	no	0.1	942	Plasma membrane	9.9	no	no
um00463	chr01	1318480	1320669	1	no	0.181	729	Nuclear	6.2	no	no
um00464	chr01	1321037	1323856	-1	no	0.157	939	Nuclear	4.4	no	no
um00465	chr01	1325634	1327844	1	no	0.191	736	Plasma membrane	7	no	no
um00466	chr01	1328360	1329445	-1	yes	0.69	361	Extracellular (Secreted)	5.8	yes	yes
um00467	chr01	1331014	1333599	-1	no	0.105	861	Nuclear	3.2	no	no
um00468	chr01	1337935	1342221	-1	no	0.102	1428	Plasma membrane	3.5	no	no
um00469	chr01	1343518	1344494	1	no	0.101	135	Nuclear	10	no	no
um10118	chr01	1344766	1345568	-1	no	0.127	205	Cytoplasmic	9.9	no	no
um10119	chr01	1346042	1347469	1	no	0.102	475	Nuclear	5.8	no	no
um12155	chr01	1347655	1352031	-1	no	0.143	915	Plasma membrane	3.1	no	no
um00473	chr01	1353910	1356477	1	no	0.108	855	Nuclear	4.5	no	no
um10120	chr01	1357041	1360130	-1	no	0.107	1029	Plasma membrane	9.8	no	no
um00475	chr01	1361484	1366958	-1	no	0.138	1824	Plasma membrane	4.8	no	no
um00476	chr01	1367671	1368654	1	no	0.139	327	Membrane bound Mitochondrial	7	no	no
um00477	chr01	1368759	1370468	-1	no	0.111	569	Plasma membrane	7.8	no	no
um00478	chr01	1371620	1373263	1	no	0.13	547	Nuclear	3.3	no	no
um10121	chr01	1373400	1377734	-1	no	0.1	1444	Nuclear	4.5	no	no
um10122	chr01	1380319	1380885	-1	no	0.198	188	Mitochondrial	7.5	no	no
um00480	chr01	1381205	1384627	1	yes	0.864	1140	Membrane bound Vacuolar	8.4	yes	no
um00481	chr01	1385006	1385536	-1	no	0.3	176	Plasma membrane	5.2	no	no
um00482	chr01	1386291	1387907	1	no	0.109	538	Nuclear	7	no	no
um00483	chr01	1388064	1389677	-1	no	0.118	537	Nuclear	6	no	no
um10123	chr01	1391562	1393372	1	no	0.111	577	Cytoplasmic	7.1	no	no
um10124	chr01	1393665	1394756	1	no	0.12	363	Plasma membrane	2.3	no	no
um00486	chr01	1394927	1396585	-1	no	0.102	552	Cytoplasmic	9.2	no	no
um15059	chr01	1399061	1407487	1	no	0.112	2743	Membrane bound Mitochondrial	3.9	no	no
um11825	chr01	1407771	1409879	-1	no	0.111	702	Nuclear	6.2	no	no
um00490	chr01	1415556	1417607	1	no	0.131	683	Cytoplasmic	10	no	no
um00491	chr01	1418706	1421003	1	no	0.103	765	Cytoplasmic	3.9	no	no
um00492	chr01	1422346	1423788	1	yes	0.626	480	Plasma membrane	7.5	yes	yes
um00493	chr01	1424157	1425710	-1	no	0.107	517	Membrane bound Golgi	2.5	no	no
um15088	chr01	1428131	1432642	1	no	0.121	1460	Cytoplasmic	4.9	no	no
um00494	chr01	1432818	1437260	-1	no	0.105	1480	Membrane bound Extracellular (Secreted)	4.9	no	no
um00495	chr01	1438052	1438766	1	no	0.125	177	Membrane bound Mitochondrial	7.4	no	no
um00496	chr01	1438995	1439383	-1	no	0.103	98	Cytoplasmic	7	no	no
um12104	chr01	1441001	1443256	-1	no	0.103	751	Nuclear	4.2	no	no
um11430	chr01	1444213	1446131	-1	no	0.104	582	Cytoplasmic	5.6	no	no
um00499	chr01	1447665	1448870	-1	no	0.112	401	Nuclear	3	no	no
um11431	chr01	1449617	1450396	1	no	0.115	259	Nuclear	4.3	no	no
um00501	chr01	1450491	1451480	-1	no	0.099	329	Membrane bound Peroxisomal	5.2	no	no
um00503	chr01	1458540	1459979	-1	no	0.169	479	Membrane bound Mitochondrial	5.2	no	no
um11433	chr01	1461137	1462846	1	no	0.107	569	Membrane bound Vacuolar	6.5	no	no
um00505	chr01	1463439	1466669	1	no	0.148	1076	Cytoplasmic	6	no	no
um00506	chr01	1466925	1467758	-1	no	0.102	277	Plasma membrane	5.6	no	no
um00507	chr01	1468251	1469094	1	no	0.122	254	Nuclear	4.2	no	no
um00508	chr01	1469672	1470605	-1	no	0.17	170	Membrane bound Vacuolar	9.6	no	no
um11434	chr01	1471349	1474128	-1	no	0.105	891	Plasma membrane	6.9	no	no
um00510	chr01	1477164	1478360	-1	no	0.136	398	Membrane bound Mitochondrial	8.8	no	no
um12105	chr01	1479228	1480135	1	no	0.118	204	Cytoplasmic	6.7	no	no
um00512	chr01	1480447	1481239	-1	no	0.136	185	Mitochondrial	10	no	no
um00513	chr01	1481791	1486509	1	no	0.116	1572	Cytoplasmic	3	no	no
um11435	chr01	1486663	1487622	-1	no	0.116	319	Nuclear	5.5	no	no
um00515	chr01	1488563	1489642	1	no	0.123	359	Membrane bound Lysosomal	4.8	no	no
um00516	chr01	1489846	1493079	-1	no	0.112	1077	Nuclear	6.6	no	no
um12106	chr01	1493804	1497700	1	no	0.125	1298	Cytoplasmic	9.9	no	no
um00518	chr01	1497853	1499325	-1	no	0.17	490	Membrane bound Mitochondrial	4.1	no	no
um11436	chr01	1500217	1501268	-1	no	0.132	274	Mitochondrial	9.8	no	no
um11437	chr01	1501864	1502882	-1	no	0.097	190	Plasma membrane	7.7	no	no
um11438	chr01	1504324	1505931	1	no	0.103	535	Nuclear	3.6	no	no
um00522	chr01	1510558	1512378	1	no	0.106	606	Nuclear	6.4	no	no
um00523	chr01	1512738	1514465	-1	no	0.134	575	Nuclear	6.1	no	no
um11439	chr01	1515607	1517295	1	no	0.106	533	Nuclear	5.8	no	no
um00525	chr01	1517575	1518678	-1	no	0.099	227	Cytoplasmic	9.3	no	no
um00526	chr01	1519196	1520581	1	no	0.114	461	Cytoplasmic	9.6	no	no
um00527	chr01	1520771	1521283	-1	no	0.101	170	Nuclear	5	no	no
um00528	chr01	1525120	1529382	1	no	0.11	1420	Nuclear	3.9	no	no
um00529	chr01	1530013	1531727	-1	no	0.107	505	Membrane bound Endoplasmic reticulum	4.5	no	no
um00530	chr01	1534662	1536113	-1	no	0.219	483	Membrane bound Mitochondrial	7.3	no	no
um11440	chr01	1539611	1541824	1	no	0.139	737	Nuclear	4.4	no	no
um00532	chr01	1541995	1543653	-1	no	0.1	552	Nuclear	6.5	no	no
um00533	chr01	1544754	1548605	1	no	0.103	1283	Nuclear	2.2	no	no
um00534	chr01	1550050	1552173	1	yes	0.936	707	Plasma membrane	7.3	yes	yes
um00535	chr01	1552398	1554941	-1	no	0.144	847	Membrane bound Mitochondrial	6.6	no	no
um00536	chr01	1555943	1556770	-1	no	0.125	275	Membrane bound Mitochondrial	9.6	no	no
um11441	chr01	1558530	1558825	1	no	0.102	65	Extracellular (Secreted)	7.8	yes	no
um11442	chr01	1560587	1562473	1	no	0.106	628	Membrane bound Mitochondrial	9.2	no	no
um11443	chr01	1563285	1563578	-1	yes	0.842	97	Extracellular (Secreted)	8	yes	yes
um00538	chr01	1564578	1565642	1	yes	0.756	354	Nuclear	5	yes	yes
um11444	chr01	1566417	1566707	1	yes	0.884	96	Extracellular (Secreted)	9.8	yes	yes
um00539	chr01	1567013	1572481	-1	no	0.179	1822	Nuclear	5	no	no
um00540	chr01	1574075	1576207	1	no	0.102	710	Membrane bound Endoplasmic reticulum	7.6	no	no
um11445	chr01	1576656	1577311	-1	no	0.124	190	Nuclear	3.2	no	no
um00542	chr01	1577823	1580075	1	no	0.172	750	Plasma membrane	5.4	no	no
um00543	chr01	1580229	1584290	-1	no	0.101	1353	Nuclear	5.7	no	no
um00545	chr01	1587523	1588674	1	no	0.101	383	Nuclear	6.1	no	no
um15006	chr01	1589033	1589826	-1	no	0.127	156	Nuclear	7.3	no	no
um10459	chr01	1590448	1591695	1	no	0.103	415	Cytoplasmic	6.7	no	no
um00547	chr01	1593138	1594061	1	no	0.263	307	Cytoplasmic	4.4	no	no
um00548	chr01	1594240	1596180	-1	no	0.104	646	Membrane bound Golgi	9.9	no	no
um00549	chr01	1597373	1600474	1	no	0.14	1033	Nuclear	3.7	no	no
um00550	chr01	1604000	1604326	-1	no	0.136	108	Plasma membrane	3.3	no	no
um00551	chr01	1605832	1608594	1	no	0.154	920	Nuclear	6.1	no	no
um10461	chr01	1609461	1614404	1	no	0.101	1647	Membrane bound Vacuolar	8.2	no	no
um00553	chr01	1614619	1617750	-1	no	0.104	1043	Cytoplasmic	7.2	no	no
um10462	chr01	1618998	1620729	1	no	0.111	549	Cytoplasmic	4.3	no	no
um00555	chr01	1620948	1622018	-1	no	0.122	356	Cytoplasmic	9.8	no	no
um10463	chr01	1623503	1625457	-1	no	0.105	623	Cytoplasmic	5.1	no	no
um10464	chr01	1626094	1626542	1	no	0.108	71	Mitochondrial	8.1	no	no
um00557	chr01	1627215	1630667	1	no	0.116	1150	Nuclear	3.3	no	no
um00558	chr01	1631595	1632267	1	yes	0.73	138	Extracellular (Secreted)	9.6	yes	yes
um00559	chr01	1634079	1634399	-1	no	0.103	106	Vacuolar	2.9	no	no
um00560	chr01	1634800	1636354	1	no	0.099	402	Cytoplasmic	6.4	no	no
um00561	chr01	1637079	1638379	-1	no	0.108	402	Cytoplasmic	8.2	no	no
um00562	chr01	1638914	1640155	-1	no	0.136	413	Nuclear	6	no	no
um00563	chr01	1642866	1643378	1	no	0.134	170	Membrane bound Mitochondrial	7.1	no	no
um00564	chr01	1643972	1645078	1	no	0.118	368	Nuclear	2.8	no	no
um00565	chr01	1645373	1647055	-1	no	0.167	560	Cytoplasmic	10	no	no
um10465	chr01	1647869	1656454	-1	no	0.115	2861	Cytoplasmic	4.8	no	no
um00567	chr01	1659676	1660524	1	yes	0.833	282	Membrane bound Extracellular (Secreted)	9.5	yes	no
um00568	chr01	1660845	1663184	-1	no	0.19	779	Nuclear	4.7	no	no
um00569	chr01	1664096	1666552	1	no	0.114	818	Nuclear	6.2	no	no
um10466	chr01	1667130	1668077	1	no	0.221	315	Cytoplasmic	7.3	no	no
um10467	chr01	1668197	1673143	-1	no	0.098	1648	Membrane bound Vacuolar	9.1	no	no
um00572	chr01	1674543	1676984	-1	no	0.128	813	Membrane bound Mitochondrial	3.2	no	no
um00573	chr01	1677854	1678722	-1	no	0.1	251	Mitochondrial	6.5	no	no
um00574	chr01	1679998	1685052	-1	no	0.102	1684	Plasma membrane	4.4	no	no
um00575	chr01	1685553	1688201	1	no	0.105	882	Nuclear	6	no	no
um00576	chr01	1688370	1689083	-1	no	0.143	237	Nuclear	5.2	no	no
um12052	chr01	1690004	1691499	-1	no	0.118	473	Nuclear	9.9	no	no
um00578	chr01	1691754	1693905	1	no	0.165	626	Nuclear	6.9	no	no
um00579	chr01	1694217	1696898	-1	no	0.124	893	Cytoplasmic	2.7	no	no
um10468	chr01	1697858	1698655	1	no	0.102	265	Plasma membrane	6.7	no	no
um00581	chr01	1698929	1700848	-1	no	0.451	639	Plasma membrane	7.3	no	no
um00582	chr01	1702041	1705178	1	no	0.107	1045	Membrane bound Mitochondrial	7.8	no	no
um00583	chr01	1705915	1707969	1	no	0.161	684	Membrane bound Mitochondrial	8.4	no	no
um00584	chr01	1710174	1711437	1	no	0.101	374	Cytoplasmic	9.6	no	no
um00585	chr01	1712629	1714281	-1	no	0.116	550	Nuclear	9.9	no	no
um00586	chr01	1714795	1716966	1	no	0.106	723	Nuclear	6.6	no	no
um12146	chr01	1717345	1718796	-1	no	0.129	483	Nuclear	5.3	no	no
um00588	chr01	1722783	1726658	1	no	0.102	1291	Cytoplasmic	4.7	no	no
um00589	chr01	1727381	1728187	1	no	0.104	268	Membrane bound Mitochondrial	9.6	no	no
um00590	chr01	1728335	1730791	-1	no	0.107	818	Nuclear	6.5	no	no
um10469	chr01	1731810	1733453	-1	no	0.125	207	Cytoplasmic	6.1	no	no
um00592	chr01	1734598	1737207	-1	no	0.109	869	Nuclear	6.2	no	no
um00593	chr01	1739354	1740213	-1	no	0.102	261	Cytoplasmic	4.9	no	no
um00594	chr01	1741535	1743046	-1	no	0.128	503	Membrane bound Mitochondrial	9.5	no	no
um00595	chr01	1744617	1745915	-1	no	0.218	432	Membrane bound Mitochondrial	9.7	no	no
um00596	chr01	1746691	1749444	1	no	0.17	917	Mitochondrial	8.4	no	no
um00597	chr01	1749594	1751654	-1	no	0.109	686	Membrane bound Mitochondrial	9.8	no	no
um00598	chr01	1753887	1755239	1	yes	0.887	450	Membrane bound Endoplasmic reticulum	4	yes	yes
um00599	chr01	1755912	1757762	1	no	0.099	616	Membrane bound Mitochondrial	3.6	no	no
um12108	chr01	1757882	1759249	-1	no	0.102	371	Golgi	8.5	no	no
um00601	chr01	1759597	1760994	1	no	0.119	465	Cytoplasmic	4.1	no	no
um00602	chr01	1761237	1763498	-1	no	0.119	753	Membrane bound Mitochondrial	5.4	no	no
um00603	chr01	1765877	1767589	1	no	0.114	570	Cytoplasmic	5.7	no	no
um00604	chr01	1767710	1768360	-1	no	0.11	216	Membrane bound Mitochondrial	3.2	no	no
um00605	chr01	1768735	1770969	1	no	0.11	744	Membrane bound Endoplasmic reticulum	10	no	no
um15049	chr01	1772617	1775865	1	no	0.106	1007	Nuclear	5.9	no	no
um00606	chr01	1776728	1780771	-1	no	0.13	1347	Nuclear	2.6	no	no
um00607	chr01	1781724	1782626	1	no	0.102	300	Nuclear	5.4	no	no
um00608	chr01	1783517	1784284	1	no	0.136	255	Membrane bound Mitochondrial	3.5	no	no
um10921	chr01	1784481	1786967	-1	yes	0.529	828	Membrane bound Mitochondrial	6.6	yes	yes
um00610	chr01	1787739	1788620	-1	no	0.139	293	Nuclear	5.6	no	no
um10922	chr01	1789179	1793069	1	no	0.1	1296	Cytoplasmic	3.5	no	no
um00612	chr01	1793176	1799025	-1	no	0.103	1949	Plasma membrane	4.5	no	no
um10923	chr01	1799736	1803408	1	no	0.104	1090	Cytoplasmic	4.6	no	no
um00614	chr01	1804291	1805466	1	no	0.11	391	Mitochondrial	4.2	no	no
um00615	chr01	1805795	1806403	-1	no	0.1	202	Nuclear	9.9	no	no
um00616	chr01	1807067	1808299	-1	no	0.189	410	Membrane bound Vacuolar	4.2	no	no
um00617	chr01	1809752	1810996	1	no	0.151	414	Membrane bound Mitochondrial	9.7	no	no
um10924	chr01	1811117	1813351	-1	no	0.137	744	Nuclear	3.3	no	no
um10925	chr01	1814017	1815363	1	no	0.105	376	Nuclear	6.3	no	no
um00620	chr01	1815634	1816341	-1	no	0.114	175	Membrane bound Mitochondrial	9.1	no	no
um10926	chr01	1816979	1818820	-1	no	0.114	613	Cytoplasmic	8.4	no	no
um00622	chr01	1819846	1821282	1	no	0.1	478	Cytoplasmic	3.3	no	no
um00623	chr01	1821499	1822866	-1	no	0.126	455	Nuclear	5.8	no	no
um00624	chr01	1823597	1824433	-1	no	0.129	278	Plasma membrane	7.9	no	no
um00625	chr01	1825526	1828519	1	no	0.103	997	Membrane bound Golgi	8.1	no	no
um10928	chr01	1828760	1830166	-1	no	0.108	468	Nuclear	5.8	no	no
um10929	chr01	1831314	1831704	-1	no	0.113	96	Cytoplasmic	4.2	no	no
um00627	chr01	1832737	1833622	1	no	0.121	148	Membrane bound Extracellular (Secreted)	9.2	no	no
um15009	chr01	1838414	1840617	1	no	0.105	697	Nuclear	4.4	no	no
um00628	chr01	1842313	1843734	-1	yes	0.877	473	Plasma membrane	2.6	yes	yes
um00629	chr01	1844765	1845658	-1	no	0.482	297	Plasma membrane	2.7	no	no
um00630	chr01	1846207	1848774	-1	no	0.18	855	Membrane bound Vacuolar	9.7	no	no
um11447	chr01	1849469	1851802	1	no	0.213	777	Plasma membrane	8.2	no	no
um00632	chr01	1852217	1853213	1	no	0.133	301	Membrane bound Mitochondrial	7.2	no	no
um11448	chr01	1853585	1854376	-1	no	0.195	263	Mitochondrial	9.9	no	no
um00634	chr01	1855267	1856206	1	no	0.369	269	Membrane bound Mitochondrial	9.9	no	no
um00635	chr01	1856515	1858572	-1	no	0.204	685	Membrane bound Mitochondrial	9.2	no	no
um00636	chr01	1859707	1860861	-1	no	0.102	384	Nuclear	4.4	no	no
um00637	chr01	1863643	1864584	-1	no	0.343	313	Membrane bound Mitochondrial	6.5	no	no
um00638	chr01	1866609	1867886	1	yes	0.899	425	Membrane bound Golgi	6.5	yes	yes
um00639	chr01	1868587	1873602	1	no	0.142	1671	Cytoplasmic	2.7	no	no
um11449	chr01	1874725	1876911	1	no	0.114	728	Membrane bound Mitochondrial	2.9	no	no
um11450	chr01	1877457	1879295	-1	no	0.127	612	Nuclear	6.4	no	no
um11451	chr01	1885354	1886796	-1	no	0.137	354	Membrane bound Mitochondrial	3.2	no	no
um11452	chr01	1887239	1887475	1	no	0.148	78	Membrane bound Mitochondrial	9.3	no	no
um00644	chr01	1888138	1893228	-1	no	0.109	1696	Nuclear	2.7	no	no
um00645	chr01	1895915	1898878	-1	no	0.104	987	Cytoplasmic	7.3	no	no
um00646	chr01	1900158	1901132	1	no	0.341	324	Membrane bound Mitochondrial	8.1	no	no
um00647	chr01	1902253	1903671	-1	no	0.148	472	Cytoplasmic	2.5	no	no
um11453	chr01	1904958	1905767	1	no	0.102	150	Cytoplasmic	8.6	no	no
um11454	chr01	1906204	1907115	1	no	0.226	303	Membrane bound Mitochondrial	6.7	no	no
um11455	chr01	1907167	1908969	-1	no	0.107	600	Membrane bound Mitochondrial	8.3	no	no
um00650	chr01	1910281	1911453	-1	no	0.183	390	Cytoplasmic	4.6	no	no
um00651	chr01	1912040	1914166	-1	no	0.109	708	Cytoplasmic	2.9	no	no
um00652	chr01	1914884	1917283	-1	no	0.148	799	Membrane bound Mitochondrial	9.3	no	no
um11456	chr01	1917891	1919534	1	no	0.185	547	Membrane bound Vacuolar	7.2	no	no
um00654	chr01	1919624	1920244	-1	no	0.169	206	Golgi	9.8	no	no
um00655	chr01	1921355	1923151	1	yes	0.79	598	Membrane bound Lysosomal	6.4	yes	yes
um00656	chr01	1923757	1925355	1	no	0.105	532	Cytoplasmic	4.4	no	no
um00657	chr01	1925909	1927861	1	no	0.126	650	Nuclear	3.8	no	no
um15012	chr01	1928945	1931701	1	no	0.122	866	Membrane bound Mitochondrial	6.9	no	no
um00658	chr01	1932084	1932895	-1	no	0.125	151	Mitochondrial	5.7	no	no
um11827	chr01	1935067	1935798	1	no	0.1	243	Cytoplasmic	7.5	no	no
um00660	chr01	1937445	1940069	1	no	0.138	874	Membrane bound Mitochondrial	7.6	no	no
um11828	chr01	1940317	1941645	-1	no	0.111	442	Nuclear	10	no	no
um11829	chr01	1943163	1944635	1	no	0.428	490	Plasma membrane	9.6	no	no
um00663	chr01	1945041	1947590	-1	no	0.186	849	Cytoplasmic	8.7	no	no
um00664	chr01	1949023	1950014	-1	yes	0.963	299	Membrane bound Mitochondrial	5.2	yes	yes
um11830	chr01	1950681	1951752	1	no	0.122	325	Nuclear	4.1	no	no
um11831	chr01	1952216	1952607	-1	no	0.239	87	Membrane bound Mitochondrial	8.8	no	no
um00666	chr01	1953147	1954406	-1	no	0.103	419	Cytoplasmic	2.5	no	no
um00667	chr01	1954814	1955788	1	no	0.102	324	Nuclear	4.9	no	no
um00668	chr01	1956065	1958830	-1	no	0.101	921	Nuclear	6.3	no	no
um12346	chr01	1960384	1960698	1	no	0.1	75	Nuclear	6.2	no	no
um00669	chr01	1960906	1962111	-1	no	0.106	401	Nuclear	5.4	no	no
um00670	chr01	1963824	1966520	1	no	0.103	898	Plasma membrane	8.8	no	no
um11612	chr01	1972853	1974511	1	no	0.098	552	Nuclear	5.5	no	no
um00671	chr01	1974901	1978713	-1	no	0.119	1270	Plasma membrane	5.1	no	no
um00672	chr01	1980763	1981746	1	no	0.109	327	Membrane bound Peroxisomal	9.9	no	no
um00673	chr01	1982420	1983457	1	no	0.106	200	Mitochondrial	8.9	no	no
um00674	chr01	1985318	1986616	1	no	0.115	358	Cytoplasmic	10	no	no
um00675	chr01	1986857	1988770	-1	no	0.103	637	Nuclear	4.7	no	no
um00676	chr01	1989719	1992082	1	no	0.285	787	Membrane bound Mitochondrial	9.9	no	no
um11613	chr01	1992178	1994046	-1	no	0.103	622	Cytoplasmic	8.4	no	no
um11614	chr01	1994400	1994712	1	no	0.108	54	Plasma membrane	3.3	no	no
um00678	chr01	1995759	2000450	-1	no	0.109	1563	Nuclear	8.4	no	no
um00679	chr01	2001580	2003319	1	no	0.103	579	Plasma membrane	8.5	no	no
um11615	chr01	2003780	2004794	1	no	0.12	307	Nuclear	4.6	no	no
um11616	chr01	2005009	2005430	-1	no	0.114	105	Mitochondrial	9.9	no	no
um11617	chr01	2006290	2007489	1	no	0.176	399	Membrane bound Mitochondrial	6.2	no	no
um11618	chr01	2007622	2009037	-1	no	0.158	471	Membrane bound Mitochondrial	9.3	no	no
um00684	chr01	2009388	2010983	1	no	0.437	531	Plasma membrane	4.6	no	no
um00685	chr01	2011630	2013120	-1	no	0.104	496	Nuclear	9.8	no	no
um11619	chr01	2013816	2014739	1	no	0.102	125	Cytoplasmic	10	no	no
um00687	chr01	2015651	2018200	1	no	0.109	800	Cytoplasmic	6.2	no	no
um00688	chr01	2018412	2019650	-1	yes	0.815	412	Membrane bound Extracellular (Secreted)	5.5	yes	yes
um00689	chr01	2020286	2022493	-1	no	0.11	735	Nuclear	5.9	no	no
um11620	chr01	2023037	2023819	1	no	0.138	260	Nuclear	4.1	no	no
um00691	chr01	2024153	2026774	-1	no	0.102	873	Nuclear	6.1	no	no
um00692	chr01	2029478	2030293	-1	yes	0.748	271	Extracellular (Secreted)	7.5	yes	yes
um15016	chr01	2031891	2034015	1	no	0.107	673	Nuclear	5.9	no	no
um00693	chr01	2035871	2040790	1	no	0.133	1639	Plasma membrane	5.5	no	no
um00694	chr01	2041795	2043146	1	no	0.105	403	Membrane bound Mitochondrial	5.9	no	no
um00695	chr01	2043954	2046020	1	yes	0.743	688	Membrane bound Mitochondrial	2.4	yes	yes
um00696	chr01	2047040	2053072	-1	no	0.115	2010	Plasma membrane	4.6	no	no
um11833	chr01	2055015	2056943	1	no	0.101	642	Nuclear	7.9	no	no
um00698	chr01	2057322	2058855	-1	no	0.109	489	Nuclear	3.3	no	no
um00699	chr01	2059790	2061604	1	no	0.114	604	Cytoplasmic	4.4	no	no
um00700	chr01	2061771	2062841	-1	no	0.15	356	Cytoplasmic	4.1	no	no
um00701	chr01	2063919	2065791	-1	no	0.231	598	Membrane bound Extracellular (Secreted)	3	no	no
um00702	chr01	2066942	2072809	-1	no	0.099	1955	Membrane bound Endoplasmic reticulum	5.6	no	no
um00703	chr01	2074073	2075122	1	no	0.107	349	Cytoplasmic	10	no	no
um11164	chr01	2075941	2076663	1	no	0.221	217	Membrane bound Golgi	7.4	no	no
um11165	chr01	2076816	2079635	-1	no	0.167	939	Cytoplasmic	3.3	no	no
um00706	chr01	2082223	2086533	1	no	0.103	1436	Nuclear	6.3	no	no
um11166	chr01	2088588	2091230	1	no	0.1	880	Plasma membrane	6.1	no	no
um00708	chr01	2092385	2094154	1	no	0.115	589	Membrane bound Extracellular (Secreted)	2.8	no	no
um11167	chr01	2095338	2095841	1	no	0.173	167	Membrane bound Mitochondrial	9.9	no	no
um00710	chr01	2096222	2098912	-1	no	0.105	896	Nuclear	5	no	no
um00711	chr01	2099387	2100181	1	no	0.103	264	Cytoplasmic	7.4	no	no
um00712	chr01	2100504	2105348	-1	no	0.167	1614	Plasma membrane	7.3	no	no
um00714	chr01	2107989	2110184	1	no	0.101	731	Nuclear	5.6	no	no
um00715	chr01	2110583	2111566	1	yes	0.876	327	Membrane bound Extracellular (Secreted)	4.8	yes	yes
um00716	chr01	2111779	2112876	-1	no	0.102	365	Nuclear	6.6	no	no
um11168	chr01	2113250	2113631	1	no	0.101	83	Mitochondrial	9.6	no	no
um11169	chr01	2114595	2115230	1	no	0.147	211	Plasma membrane	9.3	no	no
um11170	chr01	2116000	2117730	1	no	0.131	508	Membrane bound Mitochondrial	10	no	no
um00719	chr01	2118957	2119361	1	no	0.148	134	Membrane bound Mitochondrial	3.4	no	no
um11171	chr01	2119979	2121916	-1	no	0.101	645	Plasma membrane	9.3	no	no
um00721	chr01	2123396	2128564	1	no	0.101	1722	Plasma membrane	3.8	no	no
um00722	chr01	2129501	2131498	1	no	0.128	665	Nuclear	3.5	no	no
um00723	chr01	2131663	2133075	-1	yes	0.685	470	Membrane bound Extracellular (Secreted)	5.7	yes	yes
um11172	chr01	2137099	2138565	1	no	0.162	488	Plasma membrane	9.9	no	no
um00725	chr01	2139024	2140067	-1	no	0.107	347	Nuclear	6.5	no	no
um12110	chr01	2140692	2141663	-1	no	0.222	323	Membrane bound Mitochondrial	9.7	no	no
um00727	chr01	2142137	2147422	-1	no	0.1	1761	Plasma membrane	7.2	no	no
um00728	chr01	2151043	2153163	1	no	0.102	706	Membrane bound Mitochondrial	2.7	no	no
um00729	chr01	2153973	2155004	1	no	0.119	343	Cytoplasmic	7.5	no	no
um11173	chr01	2155373	2157611	-1	yes	0.476	554	Plasma membrane	3.2	yes	yes
um00731	chr01	2158035	2158364	-1	no	0.15	109	Membrane bound Extracellular (Secreted)	7.4	no	no
um11174	chr01	2159825	2160619	1	no	0.177	237	Membrane bound Endoplasmic reticulum	4	no	no
um15019	chr01	2162089	2167153	1	no	0.1	1639	Cytoplasmic	7.9	no	no
um15020	chr01	2168697	2169427	1	yes	0.88	209	Plasma membrane	5.4	yes	yes
um00734	chr01	2172659	2175775	1	no	0.148	1038	Nuclear	6.2	no	no
um00735	chr01	2176053	2178353	-1	no	0.107	766	Nuclear	6.1	no	no
um00736	chr01	2179166	2183944	-1	no	0.121	1592	Cytoplasmic	5.4	no	no
um00737	chr01	2187047	2190712	-1	no	0.175	1221	Nuclear	9.8	no	no
um00738	chr01	2191839	2192411	-1	no	0.237	190	Membrane bound Endoplasmic reticulum	9	no	no
um00739	chr01	2194046	2197555	1	no	0.1	1169	Cytoplasmic	7.8	no	no
um00740	chr01	2197799	2199499	-1	no	0.193	566	Membrane bound Mitochondrial	4.6	no	no
um00741	chr01	2200413	2204057	1	no	0.161	1214	Nuclear	3.1	no	no
um00742	chr01	2204443	2207235	1	no	0.105	930	Cytoplasmic	4.1	no	no
um00743	chr01	2207416	2209524	-1	no	0.206	702	Nuclear	5.7	no	no
um11623	chr01	2210021	2212213	1	no	0.108	730	Cytoplasmic	9.9	no	no
um00745	chr01	2212384	2213001	-1	no	0.192	205	Mitochondrial	3.2	no	no
um11624	chr01	2213570	2214589	1	no	0.106	70	Membrane bound Endoplasmic reticulum	6.1	no	no
um11625	chr01	2215401	2217136	-1	no	0.096	124	Endoplasmic reticulum	3.7	no	no
um15024	chr01	2218156	2222283	-1	no	0.314	1323	Plasma membrane	5.3	no	no
um00748	chr01	2223805	2224166	1	no	0.101	86	Mitochondrial	4.1	no	no
um00749	chr01	2225618	2227693	1	no	0.134	691	Nuclear	2.7	no	no
um00750	chr01	2228108	2229949	-1	no	0.11	613	Nuclear	7.1	no	no
um11835	chr01	2230261	2230566	-1	no	0.122	101	Membrane bound Extracellular (Secreted)	5.6	no	no
um00751	chr01	2233935	2239667	-1	no	0.108	1910	Nuclear	7.7	no	no
um00752	chr01	2242505	2242894	1	no	0.137	129	Extracellular (Secreted)	2.6	yes	no
um00753	chr01	2243318	2244067	1	no	0.101	249	Extracellular (Secreted)	8	yes	yes
um00754	chr01	2244753	2245443	1	no	0.112	166	Mitochondrial	7.6	no	no
um00755	chr01	2245662	2247296	-1	no	0.103	544	Nuclear	5.5	no	no
um00756	chr01	2247880	2249335	-1	no	0.154	452	Cytoplasmic	9.5	no	no
um00757	chr01	2250469	2255442	1	no	0.292	1657	Plasma membrane	4.8	no	no
um00758	chr01	2255849	2257963	-1	no	0.101	704	Nuclear	2.9	no	no
um11197	chr01	2258412	2260395	-1	no	0.229	629	Nuclear	7	no	no
um00760	chr01	2265235	2267118	1	no	0.154	627	Membrane bound Mitochondrial	5.3	no	no
um11198	chr01	2267507	2271622	1	no	0.138	1371	Nuclear	5.5	no	no
um11199	chr01	2272261	2274150	1	no	0.108	629	Nuclear	6.5	no	no
um00762	chr01	2274317	2275599	-1	no	0.103	400	Nuclear	5.1	no	no
um00763	chr01	2276626	2278764	-1	no	0.106	712	Plasma membrane	4.9	no	no
um11200	chr01	2280454	2282973	-1	no	0.12	839	Nuclear	7	no	no
um11201	chr01	2284660	2287254	1	no	0.126	864	Membrane bound Golgi	8.6	no	no
um00766	chr01	2287789	2294775	1	no	0.105	2328	Cytoplasmic	2.4	no	no
um00767	chr01	2295332	2297326	-1	no	0.131	664	Nuclear	6.9	no	no
um00768	chr01	2299617	2302445	1	no	0.119	942	Membrane bound Mitochondrial	7.5	no	no
um00769	chr01	2302590	2303667	-1	no	0.103	330	Nuclear	5.7	no	no
um00770	chr01	2304650	2306713	1	no	0.2	687	Cytoplasmic	9.8	no	no
um00771	chr01	2308310	2310025	1	no	0.104	571	Nuclear	5	no	no
um11202	chr01	2310612	2311726	1	no	0.118	68	Mitochondrial	5.6	no	no
um00773	chr01	2312342	2312863	-1	no	0.121	173	Membrane bound Golgi	7.3	no	no
um00774	chr01	2314390	2315079	1	no	0.147	193	Plasma membrane	8.6	no	no
um00775	chr01	2315575	2318289	-1	no	0.135	904	Nuclear	3.9	no	no
um00776	chr01	2319458	2320471	1	no	0.099	337	Nuclear	4.7	no	no
um00777	chr01	2321224	2325780	1	no	0.138	1518	Membrane bound Vacuolar	3	no	no
um00778	chr01	2326130	2326805	-1	no	0.227	131	Mitochondrial	9.9	no	no
um00779	chr01	2327346	2328215	1	no	0.123	289	Mitochondrial	9.1	no	no
um00780	chr01	2328934	2332215	1	no	0.113	1093	Nuclear	4.7	no	no
um00781	chr01	2332816	2333802	1	yes	0.752	328	Cytoplasmic	6.7	yes	yes
um00782	chr01	2335468	2338440	1	no	0.214	990	Nuclear	5	no	no
um00783	chr01	2338588	2339847	-1	no	0.166	419	Membrane bound Mitochondrial	2.9	no	no
um00784	chr01	2341546	2342898	-1	no	0.108	450	Nuclear	3.6	no	no
um12356	chr01	2344407	2344631	1	no	0.426	75	Mitochondrial	9.3	no	no
um00785	chr01	2344922	2347855	-1	no	0.165	977	Cytoplasmic	8	no	no
um00786	chr01	2348272	2350218	1	no	0.217	648	Plasma membrane	6.3	no	no
um10787	chr01	2351011	2353264	1	no	0.2	512	Membrane bound Mitochondrial	10	no	no
um00788	chr01	2353441	2355309	-1	no	0.152	622	Membrane bound Mitochondrial	7.5	no	no
um00789	chr01	2355849	2357795	-1	no	0.191	648	Mitochondrial	9.3	no	no
um00790	chr01	2361491	2366290	1	no	0.103	1599	Plasma membrane	5.3	no	no
um10788	chr01	2368253	2371078	1	no	0.119	941	Membrane bound Extracellular (Secreted)	5.7	no	no
um00792	chr01	2371510	2372124	-1	yes	0.848	174	Extracellular (Secreted)	9.6	yes	yes
um00793	chr01	2372973	2373634	1	yes	0.879	160	Extracellular (Secreted)	9.1	yes	yes
um00794	chr01	2374831	2375163	1	no	0.131	110	Plasma membrane	2.7	no	no
um00795	chr01	2375855	2376557	-1	yes	0.729	171	Extracellular (Secreted)	6.7	yes	yes
um00796	chr01	2377354	2378454	-1	no	0.108	366	Nuclear	3.6	no	no
um15051	chr01	2380652	2382570	1	no	0.1	588	Plasma membrane	6.6	no	no
um00797	chr01	2383080	2384117	-1	no	0.144	345	Cytoplasmic	4.3	no	no
um00798	chr01	2384767	2388930	1	no	0.115	1387	Membrane bound Vacuolar	5.8	no	no
um11837	chr01	2389229	2391589	-1	no	0.1	786	Cytoplasmic	3.7	no	no
um00800	chr01	2395368	2397539	1	no	0.118	723	Membrane bound Vacuolar	7	no	no
um00801	chr01	2398456	2404215	1	no	0.112	1919	Cytoplasmic	8.7	no	no
um00802	chr01	2404535	2406436	-1	no	0.117	538	Nuclear	9.9	no	no
um15030	chr01	2407443	2409025	1	no	0.435	493	Plasma membrane	3.8	no	no
um11627	chr01	2409164	2409994	-1	yes	0.644	241	Membrane bound Mitochondrial	6.9	yes	yes
um00805	chr01	2410254	2411597	1	no	0.168	447	Cytoplasmic	2.2	no	no
um00806	chr01	2411715	2412602	-1	no	0.102	295	Membrane bound Mitochondrial	2.8	no	no
um12111	chr01	2413138	2414198	-1	no	0.125	288	Nuclear	9.9	no	no
um00808	chr01	2414709	2417612	1	no	0.112	967	Cytoplasmic	5	no	no
um12112	chr01	2417883	2418311	1	no	0.223	142	Extracellular (Secreted)	5	yes	no
um11628	chr01	2418696	2419037	1	yes	0.935	113	Extracellular (Secreted)	7.9	yes	yes
um11629	chr01	2419416	2419949	1	no	0.254	177	Plasma membrane	2.5	no	no
um11630	chr01	2420113	2420616	-1	no	0.109	167	Plasma membrane	5.7	no	no
um00810	chr01	2421140	2423755	-1	no	0.101	871	Nuclear	5.9	no	no
um00811	chr01	2424306	2425364	1	no	0.274	352	Mitochondrial	7.3	no	no
um00812	chr01	2425641	2428133	-1	no	0.131	830	Membrane bound Mitochondrial	7.3	no	no
um00813	chr01	2430525	2432966	1	no	0.213	813	Nuclear	6.4	no	no
um11631	chr01	2433266	2437336	-1	no	0.106	1356	Cytoplasmic	4	no	no
um00815	chr01	2439596	2441401	-1	no	0.101	601	Plasma membrane	6.8	no	no
um00816	chr01	2443808	2445078	1	no	0.117	359	Cytoplasmic	4	no	no
um00817	chr01	2445311	2446759	-1	no	0.11	482	Cytoplasmic	5	no	no
um11632	chr01	2447362	2449902	1	no	0.124	846	Membrane bound Mitochondrial	7.3	no	no
um11633	chr01	2450594	2452111	1	no	0.117	505	Cytoplasmic	6.7	no	no
um11634	chr01	2452220	2455474	-1	no	0.133	1084	Cytoplasmic	2.9	no	no
um00821	chr01	2459478	2459837	-1	no	0.129	119	Membrane bound Extracellular (Secreted)	3.8	no	no
um00822	chr01	2460221	2461453	1	yes	0.829	410	Membrane bound Extracellular (Secreted)	3.5	yes	yes
um00823	chr01	2465746	2466435	-1	yes	0.596	229	Membrane bound Extracellular (Secreted)	5.5	yes	yes
um00824	chr01	2468481	2469020	-1	no	0.143	179	Plasma membrane	6.8	no	no
um00825	chr01	2472628	2472981	-1	no	0.126	117	Membrane bound Extracellular (Secreted)	9.5	no	no
um11637	chr01	2475328	2476017	-1	yes	0.857	229	Membrane bound Extracellular (Secreted)	9.5	yes	no
um00827	chr02	162	581	1	no	0.123	139	Plasma membrane	2.4	no	no
um00829	chr02	2563	3003	-1	no	0.258	146	Membrane bound Mitochondrial	4.1	no	no
um00830	chr02	4033	4947	1	no	0.202	304	Membrane bound Mitochondrial	4	no	no
um11242	chr02	5639	6013	1	no	0.108	88	Cytoplasmic	3.6	no	no
um00831	chr02	7352	8356	1	no	0.407	198	Plasma membrane	6.3	no	no
um00832	chr02	9016	10998	1	no	0.109	660	Membrane bound Mitochondrial	6.8	no	no
um00833	chr02	11158	12432	-1	no	0.143	424	Membrane bound Mitochondrial	8.7	no	no
um11243	chr02	13621	14631	1	no	0.408	336	Mitochondrial	9.5	no	no
um00835	chr02	14829	17270	-1	no	0.109	813	Membrane bound Mitochondrial	7.6	no	no
um00836	chr02	17705	20359	-1	no	0.101	884	Nuclear	3.9	no	no
um00837	chr02	22696	24741	1	yes	0.78	681	Membrane bound Extracellular (Secreted)	4.5	yes	yes
um11244	chr02	26713	29278	1	no	0.104	713	Plasma membrane	5.9	no	no
um11245	chr02	31569	34518	1	no	0.141	912	Membrane bound Endoplasmic reticulum	7	no	no
um00840	chr02	36660	38498	1	no	0.101	612	Plasma membrane	6.7	no	no
um00841	chr02	38663	41326	-1	no	0.102	887	Cytoplasmic	3.6	no	no
um00842	chr02	42416	44143	1	no	0.105	575	Plasma membrane	9.3	no	no
um12113	chr02	44271	44603	-1	no	0.131	110	Mitochondrial	5	no	no
um11246	chr02	45637	47631	1	no	0.128	664	Cytoplasmic	4.4	no	no
um11247	chr02	47676	48725	-1	no	0.106	349	Nuclear	5.1	no	no
um00844	chr02	49500	50387	1	no	0.143	295	Membrane bound Mitochondrial	9.8	no	no
um11248	chr02	51165	52890	-1	no	0.115	505	Membrane bound Endoplasmic reticulum	4.1	no	no
um11249	chr02	54983	56668	1	no	0.268	495	Membrane bound Mitochondrial	8.1	no	no
um00847	chr02	57094	59555	-1	no	0.106	782	Nuclear	6.1	no	no
um11251	chr02	64620	65636	1	no	0.141	100	Membrane bound Extracellular (Secreted)	9.2	no	no
um00848	chr02	66846	68564	1	no	0.133	572	Membrane bound Mitochondrial	3.8	no	no
um11253	chr02	70155	71870	1	yes	0.902	571	Plasma membrane	8.1	yes	no
um11254	chr02	72159	72559	-1	no	0.26	102	Membrane bound Mitochondrial	7	no	no
um00851	chr02	73425	74942	1	no	0.101	505	Nuclear	3.8	no	no
um11255	chr02	75055	75510	-1	no	0.251	151	Membrane bound Extracellular (Secreted)	2.6	no	no
um11256	chr02	79542	80898	1	no	0.195	350	Membrane bound Mitochondrial	7.9	no	no
um11257	chr02	81877	82519	1	no	0.189	178	Mitochondrial	9.9	no	no
um00855	chr02	82819	85023	-1	no	0.137	734	Membrane bound Peroxisomal	7	no	no
um11258	chr02	85733	87092	1	no	0.122	177	Extracellular (Secreted)	9.9	yes	yes
um00857	chr02	88615	91374	-1	no	0.122	919	Plasma membrane	4.3	no	no
um00858	chr02	92166	92862	-1	no	0.296	207	Membrane bound Extracellular (Secreted)	8.9	no	no
um00859	chr02	93611	94750	-1	no	0.112	379	Cytoplasmic	6.1	no	no
um12114	chr02	95672	97324	1	no	0.318	550	Membrane bound Mitochondrial	6.7	no	no
um00861	chr02	97458	101609	-1	no	0.123	1383	Membrane bound Mitochondrial	3.1	no	no
um00862	chr02	103705	104640	-1	no	0.11	135	Cytoplasmic	9.5	no	no
um11259	chr02	106536	107545	1	no	0.1	106	Cytoplasmic	10	no	no
um00864	chr02	108108	109478	-1	no	0.122	456	Cytoplasmic	8.2	no	no
um11260	chr02	110063	111421	1	no	0.108	452	Cytoplasmic	10	no	no
um00866	chr02	111680	112765	-1	no	0.126	361	Cytoplasmic	3	no	no
um00867	chr02	113691	114741	-1	no	0.139	130	Cytoplasmic	9.9	no	no
um11261	chr02	116250	117472	1	no	0.107	145	Cytoplasmic	9.4	no	no
um00869	chr02	118271	120211	1	no	0.171	646	Nuclear	5.7	no	no
um11262	chr02	120498	121126	-1	no	0.101	114	Cytoplasmic	10	no	no
um00871	chr02	121529	124618	1	no	0.124	1029	Nuclear	5.3	no	no
um11263	chr02	124859	127489	-1	no	0.353	876	Nuclear	6	no	no
um00872	chr02	129645	131564	1	no	0.113	639	Membrane bound Mitochondrial	2.3	no	no
um10565	chr02	132812	134833	1	yes	0.72	673	Plasma membrane	5.5	yes	yes
um10566	chr02	134968	136425	-1	no	0.098	456	Nuclear	6.1	no	no
um00874	chr02	137530	137862	-1	no	0.212	110	Membrane bound Extracellular (Secreted)	6.9	no	no
um00875	chr02	138917	139856	-1	no	0.146	210	Plasma membrane	2.9	no	no
um00876	chr02	140501	142360	1	yes	0.734	619	Membrane bound Lysosomal	8	yes	no
um10568	chr02	143563	143652	1	no	0.291	29	Plasma membrane	7.4	no	no
um10569	chr02	144127	145458	-1	no	0.103	443	Membrane bound Mitochondrial	5.2	no	no
um00878	chr02	146352	148832	1	no	0.211	826	Cytoplasmic	5.3	no	no
um00879	chr02	149832	150878	1	no	0.117	348	Membrane bound Mitochondrial	7.7	no	no
um00880	chr02	151139	152722	-1	no	0.11	527	Nuclear	3.5	no	no
um10570	chr02	154179	156587	-1	no	0.103	802	Nuclear	5.1	no	no
um11839	chr02	160639	162456	-1	yes	0.842	605	Membrane bound Extracellular (Secreted)	2.4	yes	yes
um11840	chr02	163617	164771	1	yes	0.464	384	Membrane bound Mitochondrial	8.6	yes	no
um11841	chr02	164882	166204	-1	no	0.134	440	Plasma membrane	6.8	no	no
um11842	chr02	166846	167517	1	no	0.151	223	Membrane bound Mitochondrial	5.9	no	no
um00882	chr02	167639	169786	-1	yes	0.886	715	Membrane bound Mitochondrial	6.1	yes	yes
um00883	chr02	170427	175328	-1	no	0.105	1633	Plasma membrane	2.2	no	no
um00884	chr02	177476	181696	-1	no	0.206	1406	Plasma membrane	4.8	no	no
um11843	chr02	184375	184758	1	no	0.167	127	Extracellular (Secreted)	8.7	yes	yes
um00885	chr02	187072	187920	1	yes	0.692	282	Membrane bound Extracellular (Secreted)	7.2	yes	yes
um00886	chr02	188396	190531	-1	no	0.102	711	Membrane bound Mitochondrial	2.8	no	no
um00887	chr02	191541	194360	1	no	0.106	939	Plasma membrane	6.1	no	no
um15053	chr02	198031	206004	1	no	0.105	2590	Membrane bound Mitochondrial	6.7	no	no
um00890	chr02	206645	208363	-1	no	0.112	572	Nuclear	5.7	no	no
um00891	chr02	210813	213062	-1	yes	0.818	749	Plasma membrane	8.5	yes	no
um10611	chr02	214649	215010	1	no	0.113	85	Nuclear	5.8	no	no
um00893	chr02	215901	218345	-1	no	0.11	814	Cytoplasmic	4.3	no	no
um00894	chr02	224655	226208	-1	no	0.137	517	Nuclear	10	no	no
um00895	chr02	227369	230677	1	no	0.11	1102	Nuclear	6.6	no	no
um00896	chr02	231162	235541	-1	no	0.141	1459	Cytoplasmic	7.3	no	no
um00897	chr02	237022	239643	1	no	0.101	873	Nuclear	5.4	no	no
um00898	chr02	239887	242469	-1	no	0.201	860	Membrane bound Mitochondrial	10	no	no
um12116	chr02	245992	250730	1	no	0.11	1332	Cytoplasmic	3.3	no	no
um10613	chr02	251003	252205	-1	no	0.108	400	Cytoplasmic	9.4	no	no
um10614	chr02	253577	254611	1	no	0.103	344	Membrane bound Mitochondrial	2.8	no	no
um00902	chr02	254767	258069	-1	no	0.141	1100	Nuclear	4.3	no	no
um00903	chr02	259031	261473	-1	no	0.109	778	Nuclear	5.8	no	no
um00904	chr02	262223	264982	-1	yes	0.544	919	Membrane bound Mitochondrial	2.8	yes	yes
um10615	chr02	265786	266694	-1	no	0.119	272	Membrane bound Golgi	5.5	no	no
um00906	chr02	267874	268464	-1	no	0.115	125	Nuclear	7.7	no	no
um00907	chr02	268956	270627	-1	no	0.287	487	Nuclear	3.4	no	no
um00908	chr02	271417	272121	1	no	0.111	234	Plasma membrane	3.4	no	no
um00909	chr02	272346	276137	-1	no	0.125	1263	Cytoplasmic	4.3	no	no
um10616	chr02	277342	278019	1	no	0.109	196	Mitochondrial	6	no	no
um00911	chr02	278400	282872	-1	no	0.101	1490	Plasma membrane	3.9	no	no
um00912	chr02	283896	285182	1	no	0.204	428	Plasma membrane	9.9	no	no
um10617	chr02	285350	285985	-1	no	0.209	147	Mitochondrial	8	no	no
um00913	chr02	286644	288521	-1	yes	0.642	625	Membrane bound Extracellular (Secreted)	5	yes	yes
um10618	chr02	292070	292864	1	no	0.104	264	Mitochondrial	5.4	no	no
um00915	chr02	294847	297555	-1	no	0.11	902	Membrane bound Mitochondrial	4	no	no
um00916	chr02	298089	300953	-1	no	0.326	954	Nuclear	4.4	no	no
um12117	chr02	301597	302269	1	no	0.105	188	Nuclear	5	no	no
um00919	chr02	304194	305147	1	no	0.205	317	Membrane bound Mitochondrial	9.9	no	no
um00920	chr02	305609	306767	1	no	0.098	353	Nuclear	3.7	no	no
um00921	chr02	307318	309930	-1	no	0.115	870	Nuclear	5.7	no	no
um00922	chr02	310411	311679	1	no	0.128	422	Membrane bound Mitochondrial	6.9	no	no
um00923	chr02	312039	313307	1	no	0.102	422	Nuclear	3.3	no	no
um00924	chr02	314393	316009	-1	no	0.114	459	Cytoplasmic	9.9	no	no
um10620	chr02	317664	319529	-1	no	0.111	621	Nuclear	4.8	no	no
um10621	chr02	320293	320685	-1	no	0.101	130	Cytoplasmic	9.9	no	no
um00926	chr02	322936	323550	1	no	0.133	204	Mitochondrial	4.8	no	no
um00927	chr02	324089	327250	-1	no	0.111	1053	Nuclear	4.3	no	no
um00928	chr02	327666	328718	-1	no	0.161	350	Membrane bound Mitochondrial	5.9	no	no
um00929	chr02	329950	330978	1	no	0.101	342	Nuclear	6.8	no	no
um00930	chr02	331061	334063	-1	no	0.108	1000	Nuclear	2.8	no	no
um00931	chr02	334358	335785	-1	no	0.23	475	Nuclear	6.9	no	no
um10622	chr02	336842	338326	1	no	0.282	494	Nuclear	6.1	no	no
um00933	chr02	338377	342249	-1	no	0.104	1290	Membrane bound Endoplasmic reticulum	5.9	no	no
um00934	chr02	342964	345360	-1	no	0.102	767	Cytoplasmic	8.1	no	no
um00935	chr02	346932	349289	1	no	0.131	785	Membrane bound Mitochondrial	7	no	no
um00936	chr02	350850	352733	1	no	0.101	627	Membrane bound Mitochondrial	6.9	no	no
um00937	chr02	353034	353588	-1	no	0.105	184	Nuclear	5.9	no	no
um12118	chr02	354743	356690	1	yes	0.567	553	Membrane bound Extracellular (Secreted)	3.6	yes	yes
um10623	chr02	357243	363725	-1	no	0.127	2160	Membrane bound Endoplasmic reticulum	3.7	no	no
um00940	chr02	365159	366345	1	no	0.226	132	Membrane bound Mitochondrial	10	no	no
um10624	chr02	366963	369233	-1	no	0.101	756	Membrane bound Endoplasmic reticulum	7.1	no	no
um10625	chr02	370836	372334	-1	no	0.099	154	Cytoplasmic	9.2	no	no
um10626	chr02	375734	376933	1	no	0.104	399	Nuclear	5.7	no	no
um00945	chr02	378370	381382	1	no	0.195	908	Membrane bound Mitochondrial	9.9	no	no
um00946	chr02	382637	384166	-1	no	0.12	509	Nuclear	6.3	no	no
um12119	chr02	384499	384936	-1	yes	0.528	145	Plasma membrane	6.4	yes	yes
um12120	chr02	386827	387971	-1	no	0.102	90	Cytoplasmic	3.2	no	no
um00947	chr02	389356	392301	-1	no	0.106	981	Cytoplasmic	3.6	no	no
um00948	chr02	392891	394738	1	no	0.104	615	Nuclear	3.6	no	no
um00949	chr02	395079	397385	-1	no	0.116	768	Membrane bound Mitochondrial	6.5	no	no
um00950	chr02	399096	402191	-1	no	0.119	1031	Cytoplasmic	4.1	no	no
um12121	chr02	403008	403861	-1	no	0.161	198	Membrane bound Extracellular (Secreted)	9.2	no	no
um00952	chr02	405888	406964	1	no	0.125	358	Nuclear	9.9	no	no
um10586	chr02	407972	409375	1	no	0.114	467	Cytoplasmic	9.4	no	no
um00955	chr02	410936	412570	1	no	0.103	544	Membrane bound Endoplasmic reticulum	5	no	no
um00956	chr02	413476	414693	-1	no	0.126	405	Plasma membrane	6.2	no	no
um00957	chr02	415503	419147	-1	no	0.104	1214	Cytoplasmic	6.3	no	no
um00958	chr02	421455	423869	1	no	0.148	804	Plasma membrane	7.5	no	no
um10587	chr02	424131	425648	-1	yes	0.494	505	Membrane bound Mitochondrial	7.7	yes	yes
um10588	chr02	426368	429304	-1	no	0.125	825	Nuclear	5.1	no	no
um00961	chr02	430015	430887	-1	yes	0.777	290	Extracellular (Secreted)	7.1	yes	yes
um10589	chr02	433999	435297	1	no	0.112	432	Cytoplasmic	10	no	no
um10590	chr02	436008	437060	1	no	0.135	350	Membrane bound Mitochondrial	9.5	no	no
um00963	chr02	437248	439038	-1	no	0.141	596	Nuclear	8.8	no	no
um00964	chr02	440112	442811	-1	no	0.097	736	Nuclear	10	no	no
um12122	chr02	443621	444466	1	no	0.102	281	Nuclear	4.1	no	no
um00965	chr02	444735	447098	-1	no	0.11	787	Plasma membrane	3.3	no	no
um00966	chr02	448195	451569	-1	no	0.111	1124	Cytoplasmic	2.9	no	no
um00967	chr02	454195	454863	1	yes	0.663	222	Plasma membrane	8.3	yes	no
um00968	chr02	458511	459658	-1	no	0.101	351	Nuclear	5.7	no	no
um12353	chr02	460628	461081	-1	no	0.13	87	Nuclear	9.6	no	no
um10591	chr02	461354	462079	1	no	0.108	241	Nuclear	5.5	no	no
um00970	chr02	462595	464694	-1	no	0.177	699	Plasma membrane	7.7	no	no
um15034	chr02	465850	467979	-1	no	0.378	660	Plasma membrane	6.5	no	no
um00971	chr02	469139	470008	-1	no	0.12	289	Nuclear	6.4	no	no
um11846	chr02	470429	472171	1	no	0.141	580	Membrane bound Mitochondrial	4.2	no	no
um12123	chr02	472254	473815	-1	yes	0.871	383	Membrane bound Extracellular (Secreted)	3.7	yes	yes
um11847	chr02	474149	475143	1	no	0.184	326	Nuclear	3	no	no
um00975	chr02	475699	476422	-1	no	0.129	159	Membrane bound Mitochondrial	8.9	no	no
um11848	chr02	477305	477859	1	no	0.108	140	Cytoplasmic	9	no	no
um11849	chr02	478630	479958	-1	no	0.105	214	Nuclear	7.2	no	no
um00978	chr02	481796	482779	1	no	0.112	327	Cytoplasmic	3.2	no	no
um15055	chr02	483056	486324	-1	no	0.1	1055	Cytoplasmic	3.3	no	no
um12055	chr02	488083	488768	-1	no	0.107	109	Cytoplasmic	5.7	no	no
um00980	chr02	489231	490127	1	no	0.14	298	Nuclear	3.4	no	no
um00981	chr02	491915	496315	1	no	0.126	1466	Plasma membrane	7.1	no	no
um10789	chr02	498532	498911	1	no	0.251	91	Mitochondrial	8.7	no	no
um00982	chr02	500625	501068	1	no	0.103	147	Cytoplasmic	8.3	no	no
um00983	chr02	502067	508648	1	no	0.105	2193	Cytoplasmic	4.3	no	no
um00984	chr02	509187	510380	1	no	0.165	397	Membrane bound Mitochondrial	8.2	no	no
um00985	chr02	510663	511961	-1	no	0.111	432	Nuclear	6.2	no	no
um00986	chr02	512900	513678	-1	no	0.128	215	Plasma membrane	9.8	no	no
um00987	chr02	517869	520793	1	no	0.104	974	Plasma membrane	6.1	no	no
um00988	chr02	521665	522714	1	no	0.107	349	Cytoplasmic	9.3	no	no
um00989	chr02	522921	525264	-1	no	0.103	687	Nuclear	3.1	no	no
um00990	chr02	525636	527075	1	no	0.172	479	Cytoplasmic	2.8	no	no
um00991	chr02	527233	529545	-1	no	0.1	770	Nuclear	6.3	no	no
um00992	chr02	531658	535359	-1	no	0.121	1233	Cytoplasmic	3.5	no	no
um10790	chr02	538629	540533	-1	no	0.152	634	Membrane bound Mitochondrial	8.7	no	no
um10791	chr02	543141	545099	1	no	0.114	652	Plasma membrane	3.3	no	no
um00995	chr02	546070	548391	1	no	0.121	773	Nuclear	5.2	no	no
um00996	chr02	549251	553828	1	no	0.104	1525	Nuclear	5.8	no	no
um00997	chr02	554065	555870	-1	no	0.107	601	Nuclear	3.4	no	no
um00998	chr02	556362	557708	1	no	0.099	448	Nuclear	6.1	no	no
um10792	chr02	557953	559623	-1	no	0.101	556	Cytoplasmic	4.7	no	no
um10793	chr02	561315	562382	1	no	0.106	289	Nuclear	6.3	no	no
um01001	chr02	563142	565226	1	no	0.133	694	Nuclear	9.4	no	no
um10794	chr02	565395	567008	-1	no	0.106	537	Membrane bound Golgi	8.5	no	no
um10795	chr02	567946	571185	1	no	0.113	1079	Cytoplasmic	3.8	no	no
um01004	chr02	571318	571908	-1	no	0.121	196	Mitochondrial	3.1	no	no
um01005	chr02	575087	578764	1	no	0.14	1152	Cytoplasmic	8.8	no	no
um01006	chr02	579480	580367	1	no	0.133	264	Membrane bound Mitochondrial	9.4	no	no
um01007	chr02	580538	582838	-1	no	0.309	766	Cytoplasmic	3.1	no	no
um01008	chr02	584305	591222	1	no	0.106	2305	Nuclear	8.7	no	no
um01009	chr02	594635	596875	1	no	0.127	746	Cytoplasmic	4.1	no	no
um01010	chr02	597386	598732	1	no	0.151	448	Membrane bound Mitochondrial	8.1	no	no
um01011	chr02	598899	600608	-1	no	0.121	569	Membrane bound Mitochondrial	2.3	no	no
um01012	chr02	601999	607053	1	no	0.127	1684	Membrane bound Endoplasmic reticulum	5.7	no	no
um01013	chr02	607370	610528	-1	no	0.114	1052	Nuclear	5.8	no	no
um01014	chr02	612384	612851	1	yes	0.892	155	Plasma membrane	9.7	yes	no
um10797	chr02	613688	615349	1	no	0.127	553	Mitochondrial	6.5	no	no
um01016	chr02	615462	616487	-1	no	0.102	341	Nuclear	7.6	no	no
um01017	chr02	617149	620121	1	no	0.106	990	Plasma membrane	9.9	no	no
um01018	chr02	620695	621327	1	yes	0.809	210	Endoplasmic reticulum	9.4	yes	no
um15056	chr02	622004	626472	-1	no	0.104	1455	Plasma membrane	8	no	no
um01021	chr02	628189	631119	1	no	0.105	976	Nuclear	5.3	no	no
um01022	chr02	632055	632537	-1	yes	0.771	160	Extracellular (Secreted)	7.7	yes	yes
um01023	chr02	635814	637619	1	no	0.16	601	Cytoplasmic	6.4	no	no
um01024	chr02	640579	641427	1	no	0.18	265	Membrane bound Extracellular (Secreted)	3.5	no	no
um01025	chr02	645635	647575	1	no	0.11	614	Nuclear	5.5	no	no
um01026	chr02	647910	650222	-1	no	0.115	770	Nuclear	3.7	no	no
um01027	chr02	651111	653315	-1	no	0.101	734	Nuclear	4.5	no	no
um11851	chr02	654053	654578	-1	no	0.168	138	Cytoplasmic	4.9	no	no
um11852	chr02	655260	658709	-1	no	0.101	1149	Cytoplasmic	5.4	no	no
um11853	chr02	660260	663028	1	no	0.14	922	Plasma membrane	5.3	no	no
um15057	chr02	663347	665746	-1	no	0.127	765	Nuclear	3	no	no
um01030	chr02	666658	668478	1	no	0.109	606	Nuclear	4.9	no	no
um01031	chr02	668720	669382	-1	no	0.159	220	Membrane bound Mitochondrial	7.7	no	no
um01032	chr02	670247	675313	1	no	0.104	1688	Cytoplasmic	3.6	no	no
um01033	chr02	675979	681630	1	no	0.142	1883	Plasma membrane	3.1	no	no
um11265	chr02	681765	683078	-1	no	0.106	437	Cytoplasmic	9.9	no	no
um11266	chr02	684543	686684	1	yes	0.747	713	Membrane bound Extracellular (Secreted)	6.4	yes	yes
um11267	chr02	686845	688224	-1	no	0.106	459	Membrane bound Golgi	6.8	no	no
um01037	chr02	688991	689459	1	no	0.106	146	Nuclear	4.9	no	no
um01038	chr02	689893	691743	-1	no	0.349	616	Nuclear	3.1	no	no
um11268	chr02	692345	694147	1	no	0.187	600	Membrane bound Mitochondrial	9.5	no	no
um01040	chr02	694385	695743	-1	no	0.101	452	Membrane bound Mitochondrial	9.3	no	no
um01041	chr02	696173	696574	1	no	0.122	133	Membrane bound Extracellular (Secreted)	9.2	no	no
um01042	chr02	696836	702214	-1	no	0.103	1792	Cytoplasmic	5.4	no	no
um11269	chr02	704740	707490	-1	no	0.158	916	Cytoplasmic	7.2	no	no
um12124	chr02	710274	711059	1	no	0.121	261	Nuclear	6.2	no	no
um01045	chr02	711127	713466	-1	no	0.162	779	Nuclear	5.9	no	no
um11270	chr02	714167	715639	-1	no	0.102	490	Plasma membrane	9.2	no	no
um01047	chr02	717240	717842	-1	no	0.187	200	Nuclear	5.5	no	no
um01048	chr02	719634	721193	1	no	0.104	519	Membrane bound Lysosomal	2.9	no	no
um01049	chr02	721478	722752	-1	no	0.139	424	Mitochondrial	9.9	no	no
um01050	chr02	723420	726674	-1	no	0.105	1084	Nuclear	7	no	no
um01051	chr02	731225	732871	1	no	0.145	548	Plasma membrane	9.5	no	no
um01052	chr02	734506	734784	-1	no	0.142	92	Mitochondrial	7.1	no	no
um01053	chr02	735081	735344	1	no	0.109	72	Nuclear	3.3	no	no
um01054	chr02	736291	739917	-1	no	0.115	1208	Cytoplasmic	9.9	no	no
um01055	chr02	742998	744812	-1	no	0.104	604	Membrane bound Mitochondrial	4.3	no	no
um11271	chr02	745745	748243	1	no	0.107	832	Membrane bound Mitochondrial	3.3	no	no
um11272	chr02	748671	749312	-1	no	0.219	213	Membrane bound Endoplasmic reticulum	6.3	no	no
um01058	chr02	750179	750937	1	no	0.111	252	Membrane bound Golgi	9.5	no	no
um01059	chr02	751375	752304	-1	no	0.104	309	Membrane bound Mitochondrial	9.9	no	no
um01060	chr02	754148	755414	-1	no	0.14	154	Cytoplasmic	7.8	no	no
um01061	chr02	757045	757419	1	yes	0.72	124	Plasma membrane	8	yes	no
um01062	chr02	757804	759219	-1	no	0.107	471	Plasma membrane	5.5	no	no
um01063	chr02	760066	760887	1	no	0.101	273	Membrane bound Golgi	9.9	no	no
um01064	chr02	761311	761796	-1	no	0.104	161	Mitochondrial	9.6	no	no
um01065	chr02	762513	762911	-1	no	0.104	132	Mitochondrial	6.1	no	no
um12125	chr02	763395	763658	1	no	0.156	58	Extracellular (Secreted)	6.2	yes	no
um11273	chr02	763879	767634	-1	no	0.248	1251	Membrane bound Mitochondrial	9.9	no	no
um01067	chr02	769111	773547	1	no	0.125	1478	Cytoplasmic	9.5	no	no
um11274	chr02	775264	775720	-1	no	0.101	84	Nuclear	6.9	no	no
um11275	chr02	777061	778875	-1	no	0.147	604	Membrane bound Mitochondrial	9.8	no	no
um11276	chr02	779641	780328	-1	no	0.1	168	Cytoplasmic	10	no	no
um01070	chr02	780988	782685	-1	no	0.136	565	Plasma membrane	3.3	no	no
um01072	chr02	784899	785965	1	no	0.134	330	Cytoplasmic	7.8	no	no
um01073	chr02	786140	788752	-1	no	0.106	870	Nuclear	6.7	no	no
um01074	chr02	789240	791192	1	no	0.106	650	Nuclear	5.3	no	no
um01075	chr02	791281	797862	-1	no	0.123	2193	Membrane bound Endoplasmic reticulum	6.6	no	no
um01076	chr02	798483	799553	1	no	0.106	356	Nuclear	2.6	no	no
um01077	chr02	799733	801832	-1	no	0.112	699	Nuclear	2.6	no	no
um11277	chr02	803026	803842	1	no	0.111	221	Nuclear	5.7	no	no
um01079	chr02	804240	808004	-1	no	0.102	1223	Cytoplasmic	3.3	no	no
um01080	chr02	809581	811110	1	no	0.139	509	Cytoplasmic	8.9	no	no
um01081	chr02	811505	812704	1	no	0.104	399	Membrane bound Mitochondrial	5.9	no	no
um01082	chr02	813167	814168	-1	yes	0.622	333	Membrane bound Extracellular (Secreted)	7.8	yes	yes
um01083	chr02	815719	818709	1	no	0.102	996	Cytoplasmic	5.3	no	no
um01084	chr02	818875	820515	-1	no	0.123	546	Plasma membrane	7.6	no	no
um01085	chr02	821314	825243	1	no	0.11	1309	Membrane bound Endoplasmic reticulum	7	no	no
um12126	chr02	826099	829415	1	no	0.104	1003	Cytoplasmic	4.2	no	no
um01087	chr02	829933	832353	-1	no	0.124	806	Cytoplasmic	8.5	no	no
um01088	chr02	833284	834453	-1	no	0.197	389	Mitochondrial	9.9	no	no
um01089	chr02	835160	843193	1	no	0.112	2677	Nuclear	6.1	no	no
um01090	chr02	843390	844646	-1	no	0.117	418	Membrane bound Peroxisomal	9.6	no	no
um01091	chr02	845589	847928	-1	no	0.112	779	Nuclear	5.2	no	no
um01092	chr02	848517	849941	1	no	0.103	474	Nuclear	7.6	no	no
um01093	chr02	851652	856694	1	no	0.111	1516	Nuclear	6.3	no	no
um01094	chr02	857261	858400	-1	no	0.115	339	Cytoplasmic	4	no	no
um11278	chr02	859624	860324	-1	no	0.215	189	Membrane bound Mitochondrial	9.7	no	no
um01096	chr02	861582	862229	1	no	0.109	179	Plasma membrane	3	no	no
um11279	chr02	863037	864251	1	no	0.104	404	Membrane bound Vacuolar	5.5	no	no
um11280	chr02	864445	866043	-1	no	0.193	532	Cytoplasmic	3.1	no	no
um11281	chr02	866879	869233	-1	no	0.104	784	Nuclear	10	no	no
um01099	chr02	869894	870928	1	no	0.142	344	Membrane bound Mitochondrial	9.9	no	no
um01100	chr02	871222	871638	-1	no	0.101	138	Mitochondrial	6.3	no	no
um01101	chr02	872061	872981	1	no	0.13	164	Nuclear	2.7	no	no
um01102	chr02	873910	877830	1	no	0.18	1306	Cytoplasmic	3.6	no	no
um01103	chr02	878494	879612	1	no	0.144	168	Mitochondrial	9.9	no	no
um01104	chr02	880106	880974	-1	no	0.102	256	Mitochondrial	6.8	no	no
um01105	chr02	881766	884093	1	no	0.12	775	Membrane bound Peroxisomal	8	no	no
um11282	chr02	884877	888161	1	no	0.119	1094	Membrane bound Golgi	7.9	no	no
um01107	chr02	888323	891919	-1	no	0.13	1198	Membrane bound Mitochondrial	4.9	no	no
um11283	chr02	892641	893659	1	no	0.121	313	Plasma membrane	4.4	no	no
um11284	chr02	893903	897106	-1	no	0.175	1067	Cytoplasmic	3.8	no	no
um01110	chr02	899139	907052	-1	no	0.167	2637	Cytoplasmic	3	no	no
um11285	chr02	907531	907904	1	no	0.103	62	Cytoplasmic	3.1	no	no
um01111	chr02	909531	911378	1	no	0.102	615	Plasma membrane	5.9	no	no
um01112	chr02	911660	912732	-1	no	0.121	329	Membrane bound Mitochondrial	9	no	no
um01113	chr02	913272	914777	1	no	0.107	501	Nuclear	4.7	no	no
um01114	chr02	915102	915860	-1	no	0.115	252	Membrane bound Mitochondrial	5.3	no	no
um15060	chr02	918925	920831	1	no	0.174	600	Nuclear	6.9	no	no
um11858	chr02	921323	923143	1	no	0.174	606	Membrane bound Mitochondrial	8.5	no	no
um01115	chr02	924760	926919	1	no	0.115	719	Nuclear	3.8	no	no
um01116	chr02	927135	931022	-1	no	0.175	1295	Membrane bound Vacuolar	9.1	no	no
um01117	chr02	932454	933743	-1	no	0.171	429	Nuclear	5.8	no	no
um01118	chr02	935497	935856	1	no	0.127	119	Nuclear	2.9	no	no
um11859	chr02	940683	941514	-1	no	0.107	209	Cytoplasmic	7.8	no	no
um01120	chr02	941954	943669	-1	no	0.127	571	Membrane bound Mitochondrial	9.7	no	no
um01121	chr02	944156	945242	1	no	0.251	330	Membrane bound Mitochondrial	8.4	no	no
um01122	chr02	945826	948369	1	no	0.159	847	Membrane bound Mitochondrial	4.5	no	no
um01123	chr02	948503	952987	-1	no	0.171	1494	Plasma membrane	3.4	no	no
um11860	chr02	953589	955646	-1	no	0.102	685	Nuclear	3.9	no	no
um01125	chr02	957749	958288	-1	no	0.126	179	Nuclear	3.5	no	no
um01126	chr02	958730	959217	1	no	0.156	132	Mitochondrial	9.9	no	no
um11639	chr02	960718	961029	1	yes	0.554	103	Membrane bound Peroxisomal	5.1	yes	yes
um12127	chr02	962225	962803	1	yes	0.526	192	Membrane bound Extracellular (Secreted)	6.1	yes	yes
um01128	chr02	962883	964178	-1	no	0.158	431	Nuclear	6	no	no
um01129	chr02	964996	969153	1	no	0.313	1385	Cytoplasmic	6.9	no	no
um01130	chr02	969416	970531	-1	yes	0.8	371	Membrane bound Extracellular (Secreted)	5.5	yes	yes
um01131	chr02	971095	973740	-1	no	0.111	881	Cytoplasmic	3.6	no	no
um01132	chr02	975346	975888	1	no	0.233	180	Extracellular (Secreted)	8.1	yes	yes
um01133	chr02	976368	980237	-1	no	0.104	1289	Nuclear	9.9	no	no
um01134	chr02	980870	983182	-1	no	0.107	770	Cytoplasmic	4.8	no	no
um01136	chr02	986195	987763	-1	no	0.102	522	Plasma membrane	5.1	no	no
um11641	chr02	990087	990449	1	no	0.119	120	Plasma membrane	3.5	no	no
um11642	chr02	991334	993427	1	no	0.104	697	Mitochondrial	2.7	no	no
um01138	chr02	993564	995786	-1	no	0.108	740	Membrane bound Endoplasmic reticulum	5.8	no	no
um01139	chr02	996294	997258	1	no	0.104	257	Mitochondrial	8.4	no	no
um11643	chr02	997803	999527	1	no	0.147	574	Plasma membrane	3.8	no	no
um11644	chr02	1000370	1001824	1	no	0.115	484	Cytoplasmic	8.8	no	no
um01141	chr02	1002081	1008668	-1	no	0.29	2195	Cytoplasmic	4.8	no	no
um01142	chr02	1009944	1010984	1	no	0.158	346	Membrane bound Mitochondrial	5.2	no	no
um01143	chr02	1014092	1015534	1	yes	0.607	480	Plasma membrane	4.4	yes	yes
um01144	chr02	1016350	1017429	-1	no	0.117	359	Nuclear	6	no	no
um01145	chr02	1017772	1018329	1	no	0.433	185	Extracellular (Secreted)	4.4	yes	no
um01146	chr02	1022404	1023822	1	no	0.104	472	Nuclear	6.1	no	no
um11645	chr02	1024466	1025325	1	no	0.209	137	Membrane bound Mitochondrial	9.9	no	no
um15050	chr02	1025696	1027732	-1	no	0.111	560	Membrane bound Vacuolar	7.1	no	no
um11647	chr02	1028048	1028443	1	no	0.104	131	Nuclear	3.5	no	no
um01148	chr02	1029170	1033402	-1	no	0.112	1410	Nuclear	3	no	no
[truncated: 5,558 more rows]

## Sheet: U. hordei
Name	Chr	Begin	End	Strand	Secreted	D	Length	Location	Score	CSEP relaxed	CSEP strict
[truncated: 7,111 more rows]

## Sheet: M. pensylvanicum
Name	Chr	Begin	End	Strand	Secreted	D	Length	Location	Score	CSEP relaxed	CSEP strict
[truncated: 6,280 more rows]

[truncated: 2 more sheets: P. flocculosa, M. globosa]
