# Supplementary material for: A Tale of Genome Compartmentalization: The Evolution of Virulence Clusters in Smut Fungi
Source: Oxford University Press journal article supplement (doi:10.1093/gbe/evw026), 2016-02-12
Supplement: evw026_Supplementary_Data.zip [file evw026_Supplementary_Data.zip › TableS3.xlsx]

## Sheet: Sheet1
	chromosome	id	family	size	p.value	FDR	genes	additional genes	extended size	Relatedness FDR
S. scitamineum	scaffold00002	1	1	33	9.999e-05	0.00169983	SPSC_00098, SPSC_00097, SPSC_00096, SPSC_00095, SPSC_00094, SPSC_00093, SPSC_00092, SPSC_00091, SPSC_00090, SPSC_00089, SPSC_00088, SPSC_00087, SPSC_00086, SPSC_00085, SPSC_00084, SPSC_00083, SPSC_00082, SPSC_00081, SPSC_00080, SPSC_10008, SPSC_10007, SPSC_10006, SPSC_10005, SPSC_00079, SPSC_00078, SPSC_00077, SPSC_00076, SPSC_00075, SPSC_00074, SPSC_00073, SPSC_00072, SPSC_00071, SPSC_00070	SPSC_00069, SPSC_00068, SPSC_00067, SPSC_00066, SPSC_00065	38	0.029981
	scaffold00030	2	2	18	9.999e-05	0.00169983	SPSC_04276, SPSC_04275, SPSC_04274, SPSC_04273, SPSC_04272, SPSC_04271, SPSC_04270, SPSC_04269, SPSC_04268, SPSC_04267, SPSC_04266, SPSC_04265, SPSC_04264, SPSC_04263, SPSC_04262, SPSC_04261, SPSC_04260, SPSC_04259			0.0119225
	scaffold00044	2	3	16	9.999e-05	0.00169983	SPSC_06212, SPSC_06211, SPSC_06210, SPSC_06209, SPSC_06208, SPSC_06207, SPSC_06206, SPSC_06205, SPSC_06204, SPSC_10004, SPSC_10003, SPSC_10002, SPSC_06203, SPSC_10001, SPSC_06202, SPSC_06201			0.013757
	scaffold00036	1	4	14	0.00029997	0.00305969	SPSC_05116, SPSC_05115, SPSC_05114, SPSC_05113, SPSC_05112, SPSC_05111, SPSC_05110, SPSC_05109, SPSC_05108, SPSC_05107, SPSC_05106, SPSC_05105, SPSC_05104, SPSC_05103			0.0262349
	scaffold00033	3	5	13	0.00029997	0.00305969	SPSC_04678, SPSC_04677, SPSC_04676, SPSC_04675, SPSC_04674, SPSC_04673, SPSC_04672, SPSC_04671, SPSC_04670, SPSC_04669, SPSC_04668, SPSC_04667, SPSC_04666			0.013757
	scaffold00021	2	6	12	0.00059994	0.00437099	SPSC_03544, SPSC_03543, SPSC_03542, SPSC_03541, SPSC_03540, SPSC_03539, SPSC_03538, SPSC_03537, SPSC_03536, SPSC_03535, SPSC_03534, SPSC_03533	SPSC_03545, SPSC_03546, SPSC_03547	15	0.0262349
	scaffold00044	5	7	12	0.00059994	0.00437099	SPSC_06094, SPSC_06093, SPSC_06092, SPSC_06091, SPSC_06090, SPSC_06089, SPSC_06088, SPSC_06087, SPSC_06086, SPSC_06085, SPSC_06084, SPSC_06083			0.029981
	scaffold00009	1	1	11	0.00119988	0.00764924	SPSC_01504, SPSC_01503, SPSC_01502, SPSC_01501, SPSC_01500, SPSC_01499, SPSC_01498, SPSC_01497, SPSC_01496, SPSC_01495, SPSC_01494			0.0262349
	scaffold00038	3	3	10	0.00639936	0.036263	SPSC_05327, SPSC_05326, SPSC_05325, SPSC_05324, SPSC_05323, SPSC_05322, SPSC_05321, SPSC_05320, SPSC_05319, SPSC_05318			0.029981
	scaffold00046	1	8	8	0.00839916	0.0428357	SPSC_06636, SPSC_06635, SPSC_06634, SPSC_06633, SPSC_06632, SPSC_06631, SPSC_06630, SPSC_06629			0.029981
	scaffold00021	1	5	4	0.228277	0.831581	SPSC_03604, SPSC_03603, SPSC_03602, SPSC_03601			0.0335175
	scaffold00032	1	16	4	0.228277	0.831581	SPSC_04519, SPSC_04518, SPSC_04517, SPSC_04516			1
	scaffold00044	1	7	4	0.228277	0.831581	SPSC_06229, SPSC_06228, SPSC_06227, SPSC_06226			0.0262349
	scaffold00044	4	9	4	0.228277	0.831581	SPSC_06108, SPSC_06107, SPSC_06106, SPSC_06105			0.0335175
	scaffold00014	1	17	3	0.962004	1	SPSC_02062, SPSC_02061, SPSC_02060			0.0329721
	scaffold00014	4	8	3	0.962004	1	SPSC_01711, SPSC_01710, SPSC_01709	SPSC_01708, SPSC_01707, SPSC_01706, SPSC_01705	7	0.0329721
	scaffold00014	5	8	3	0.962004	1	SPSC_01707, SPSC_01706, SPSC_01705	NB: included in extended cluster Ss-scaf14-4		1
	scaffold00046	4	18	3	0.962004	1	SPSC_06359, SPSC_06358, SPSC_06357			1
	scaffold00045	1	10					SPSC_06340, SPSC_06341, SPSC_06342, SPSC_06343, SPSC_06344, SPSC_06345, SPSC_06346, SPSC_06347, SPSC_06348	9	0.029981
	Number of clusters with FDR 10%:			10				Number of significant clusters with relatedness FDR 10%:		10
	Size of largest cluster:			33						1
	Average cluster size (FDR 10%):			14.7				Number of clusters with relatedness FDR 10%:		16
	Number of clustered genes (FDR 10%):			147						0.842105
S. reilianum	chr05	1	7	17	9.999e-05	0.00619938	sr16561, sr16560, sr16559, sr16558, sr16557, sr16556, sr16555, sr16554, sr16553, sr16552, sr16551, sr16550, sr16549, sr16548, sr16547, sr16546, sr13434			0.0161259	Diversity region 20-15
	chr02	2	6	14	0.00029997	0.00929907	sr10321, sr10320, sr10319, sr10318, sr10317, sr10316, sr10315, sr10314, sr10313, sr10312, sr10311, sr10310, sr10309, sr10308			0.0192461	Diversity region 2-21
	chr08	2	2	13	0.00049995	0.0103323	sr14226, sr14225, sr14224, sr14223, sr14222, sr14221, sr14220, sr17609, sr02614, sr02613, sr11133, sr11132, sr11130			0.00755295	Diversity region 8-12
	chr05	4	3	11	0.00149985	0.0154985	sr13374, sr13375, sr13376, sr13377, sr13378, sr13379, sr13380, sr13381, sr13382, sr13383, sr13384	sr13385, sr13386, sr13372, sr13371, sr13370, sr13369, sr13368, sr13367, sr13366, sr13365, sr13364, sr13363, sr13362, sr13361, sr13360	26	0.00673916	Diversity region 5-12
	chr10	1	4	11	0.00149985	0.0154985	sr11238, sr11237, sr11236.2, sr11235.2, sr11234.2, sr11233, sr11232, sr20008, sr11231, sr11227, sr11226			0.0591987	Diversity region 10-15
	chr19	1	1	11	0.00149985	0.0154985	sr10079, sr10077, sr10075, sr10073, sr10071, sr10070, sr10069, sr20014, sr20013, sr10068, sr20015	sr10043, sr10045, sr10047, sr10049, sr10050, sr10051, sr10052.2, sr20016, sr20017, sr20018, sr10053, sr10054, sr10055, sr17605, sr10056, sr10057, sr20012, sr10058, sr10059, sr10060, sr10061, sr10062, sr10063, sr10064, sr10065, sr10066, sr10067	38	0.0626982	Diversity region 19-1
	chr06	3	1	10	0.00679932	0.0526947	sr11003, sr11002.2, sr11000.2, sr20007, sr10998.2, sr10997.2, sr10996.2, sr20006, sr10995.2, sr10994.2	sr11004, sr11005, sr11006, sr11008.2, sr11009	15	0.00755295	Diversity region 6-10
	chr07	4	8	10	0.00679932	0.0526947	sr13906, sr13905, sr13904, sr13903, sr13902, sr13901, sr13900, sr13899, sr13898, sr13897			0.028742	Diversity region 7-11
	chr05	2	9	6	0.00989901	0.0681932	sr13415, sr13416, sr13417, sr13418, sr13419, sr13420	sr13414, sr13413	8	0.00755295	Diversity region 5-18
	chr05	5	3	5	0.0282972	0.175442	sr13364, sr13363, sr13362, sr13361, sr13360	NB: included in extended cluster Sr-chr05-4		0.0192461	Part of diversity region 5-12
	chr01	1	17	4	0.232877	0.849315	sr12087, sr12086, sr12085, sr12084			0.0192461	Diversity region 1-32
	chr02	1	5	4	0.232877	0.849315	sr10433, sr20001, sr10432.2, sr10431.2			0.00673916	Diversity region 2-2
	chr05	6	7	4	0.232877	0.849315	sr13344, sr13343, sr13342, sr13341			0.00962738
	chr06	1	19	4	0.232877	0.849315	sr13836, sr13835, sr13834, sr13833			0.0525258	Diversity region 6-21
	chr11	1	3	4	0.232877	0.849315	sr14947, sr14946, sr14945, sr14944			0.00673916	Diversity region 11-16
	chr20	3	5	4	0.232877	0.849315	sr13525, sr13524, sr13523, sr13522			0.0235953	Diversity region 5-23
	chr20	5	8	4	0.232877	0.849315	sr13493, sr13492, sr13491, sr13490	sr13494, sr13495, sr13496	7	1	Diversity region 5-21
	chr01	2	3	3	0.964004	1	sr10116, sr10115, sr20004			0.0109094
	chr01	4	5	3	0.964004	1	sr11402, sr11401, sr11400			0.028742	Diversity region 1-51
	chr08	3	20	3	0.964004	1	sr11102, sr11101, sr11100			0.028742	Diversity region 8-11
	chr19	4	1	3	0.964004	1	sr20018, sr20017, sr20016	NB: included in extended cluster Sr-chr19-1.		1
	chr22	1	16	3	0.964004	1	sr11355, sr11354.2, sr11352			0.0643463	Diversity region 22-13
	chr21	1	10					sr16757, sr16758, sr17391, sr16762, sr16761, sr16760, sr16759	7	0.0161259
	chr12	1	5					sr15151, sr15150, sr15149, sr15148, sr15147, sr15146	6	0.0192461
	Number of clusters with FDR 10%:			9				Number of significant clusters with relatedness FDR 10%:		9
	Size of largest cluster:			17						1
	Average cluster size (FDR 10%):			11.4444				Number of clusters with relatedness FDR 10%:		22
	Number of clustered genes (FDR 10%):			103						0.916667
U. maydis	chr19	2	1	29	9.999e-05	0.00314969	um05319, um05318, um05317, um10557, um05314, um05313, um05312, um05311, um05310, um05309, um05308, um10556, um05306, um05305, um10555, um05303, um05302, um05301, um05300, um05299, um10554, um10553, um12302, um05295, um05294, um05293, um05292, um05291, um05290			0.00558092	Cluster 19A (Nature) + 4 genes
	chr11	1	3	15	9.999e-05	0.00314969	um04044, um04043, um04042, um11062, um11061, um04040, um04039, um04038, um11060, um11059, um11058, um04035, um04034, um04033, um04032			0.0181674	Cluster 11_16 (Science)
	chr10	1	4	10	0.00669933	0.069993	um03753, um03752, um03751, um03750, um03749, um03748, um03747, um03746, um03745, um03744			0.0185469	Cluster 10A (Nature)
	chr21	2	10	10	0.00669933	0.069993	um06120, um06119, um06118, um06117, um06116, um11211, um12323, um12322, um06113, um06112			1	Cluster 21_1
	chr05	6	3	8	0.00919908	0.069993	um02141, um02140, um02139, um02138, um02137, um02136, um02135, um02134			0.00558092	Part of Cluster 5_1
	chr06	2	1	8	0.00919908	0.069993	um02540, um11417, um02538, um02537, um11416, um02535, um11415, um02533			0.00558092	Cluster 6A (Nature)
	chr05	3	8	7	0.00929907	0.069993	um02299, um02298, um02297, um02296, um02295, um02294, um02293			0.0181674	Cluster 5_5 (Science)
	chr20	1	7	7	0.00929907	0.069993	um05932, um05931, um05930, um05929, um05928, um05927, um05926			0.00810383	Cluster 20_1 (Science)
	chr02	3	6	6	0.009999	0.069993	um01240, um01239, um01238, um01237, um01236, um01235			0.00558092	Cluster 2A (Nature)
	chr07	2	8	5	0.0257974	0.147749	um11484, um02854, um02853, um02852, um02851			0.0503276	Cluster 7_1 + 1 gene
	chr22	3	21	5	0.0257974	0.147749	um06181, um06180, um06179, um06178, um11250			0.00331375	Mig-2 cluster
	chr05	4	9	4	0.240276	1	um02231, um02230, um02229, um10076			0.00558092	Cluster 5_18 (5-3) (Science)
	chr08	5	2	4	0.240276	1	um12217, um12216, um12215, um03223	um10647, um03226, um03227, um03228, um03229, um10648, um03231, um03232	12	0.02949	Cluster 8_12 (Science)
	chr01	3	22	3	0.967603	1	um11444, um00538, um11443			0.02949
	chr01	4	3	3	0.967603	1	um00446, um00445, um10115			1	Cluster 1A (Nature)
	chr02	1	5	3	0.967603	1	um01302, um01301, um01300			0.02949	1/2 Cluster 2B (Nature)
	chr02	4	23	3	0.967603	1	um01204, um11305, um01202			1
	chr05	1	24	3	0.967603	1	um02475, um02474, um02473			0.0300573	Cluster 5B (Nature)
	chr05	5	25	3	0.967603	1	um02194, um02193, um02192			1	Cluster 5A (Nature)
	chr08	6	20	3	0.967603	1	um10403, um03202, um03201			0.02949	Cluster 8A (Nature)
	chr12	1	5	3	0.967603	1	um10418, um12258, um12257	um04257, um04258, um04259	6	0.0723736	Cluster 12_15 (-1 gene)
	chr22	2	16	3	0.967603	1	um06223, um06222, um06221			1	Cluster 22A (Nature)
	Number of clusters with FDR 10%:			9				Number of significant clusters with relatedness FDR 10%:		8
	Size of largest cluster:			29						0.888889
	Average cluster size (FDR 10%):			11.1111				Number of clusters with relatedness FDR 10%:		17
	Number of clustered genes (FDR 10%):			100						0.772727
U. hordei	UHOR_scaffold_5.00041	1	3	6	0.00289971	0.127587	UHOR_03557, UHOR_03560, UHOR_15387, UHOR_03536, UHOR_03534, UHOR_03533			0.013764
	UHOR_scaffold_5.00007	1	3	4	0.133987	1	UHOR_06104, UHOR_13427, UHOR_13428, UHOR_06100	UHOR_06106, UHOR_06107, UHOR_06109, UHOR_06099, UHOR_06097, UHOR_06098	10	0.115332
	UHOR_scaffold_5.00043	1	8	4	0.133987	1	UHOR_04500, UHOR_04499, UHOR_04496, UHOR_04494			1
	UHOR_scaffold_5.00061	1	5	4	0.133987	1	UHOR_01952, UHOR_01950, UHOR_01947, UHOR_01944			0.0235258
	UHOR_scaffold_5.00017	2	1	3	0.884512	1	UHOR_08134, UHOR_08132, UHOR_08130	UHOR_08119, UHOR_13884, UHOR_08120, UHOR_08121, UHOR_13886, UHOR_13888, UHOR_08127, UHOR_08128, UHOR_13890, UHOR_10014, UHOR_10015, UHOR_10016, UHOR_13893, UHOR_10017, UHOR_10018, UHOR_10019, UHOR_10020, UHOR_10021, UHOR_10022, UHOR_10023, UHOR_10024, UHOR_10025, UHOR_08123, UHOR_10026, UHOR_10027, UHOR_10028, UHOR_10029, UHOR_10030, UHOR_10031, UHOR_10032, UHOR_13915, UHOR_13916, UHOR_10033	36	0.0405684
	UHOR_scaffold_5.00031	1	17	3	0.884512	1	UHOR_01211, UHOR_01210, UHOR_01209			0.013764
	UHOR_scaffold_5.00036	1	8	3	0.884512	1	UHOR_03786, UHOR_03787, UHOR_15110			0.00362209
	UHOR_scaffold_5.00037	3	2	3	0.884512	1	UHOR_04921, UHOR_04922, UHOR_04923			0.013764
	UHOR_scaffold_5.00040	2	7	3	0.884512	1	UHOR_03684, UHOR_15327, UHOR_03683	UHOR_03685, UHOR_15324, UHOR_15323, UHOR_15322, UHOR_03682, UHOR_03680, UHOR_03679, UHOR_03678	11	0.013764
	UHOR_scaffold_5.00024	1	4					UHOR_14478, UHOR_14479, UHOR_14480, UHOR_14481	4	0.0303784
	UHOR_scaffold_5.00009	1	10					UHOR_08673, UHOR_08674, UHOR_08675, UHOR_08676, UHOR_08679, UHOR_08680, UHOR_08683, UHOR_08684, UHOR_08685	9	1
	UHOR_scaffold_5.00061	1	6					UHOR_01870, UHOR_01869, UHOR_01868, UHOR_01866, UHOR_01863, UHOR_01860	6	0.0558159
	Number of clusters with FDR 10%:			0				Number of significant clusters with relatedness FDR 10%:		0
	Size of largest cluster:			6						#DIV/0!
	Average cluster size (FDR 10%):			#DIV/0!				Number of clusters with relatedness FDR 10%:		9
	Number of clustered genes (FDR 10%):			0						0.75
P. flocculosa	scaffold00022	1	11	26	9.999e-05	0.00679932	pf05969, pf05968, pf05967, pf05966, pf05965, pf05964, pf05963, pf05962, pf05961, pf05960, pf05959, pf05958, pf05957, pf05956, pf05955, pf05954, pf05953, pf05952, pf05951, pf05950, pf05949, pf05948, pf05947, pf05946, pf05945, pf05944			0.0307667
	scaffold00015	1	12	16	0.00019998	0.00679932	pf04680, pf04679, pf04678, pf04677, pf04676, pf04675, pf04674, pf04673, pf04672, pf04671, pf04670, pf04669, pf04668, pf04667, pf04666, pf04665			0.0450842
	scaffold00003	1	6	12	0.00089991	0.020398	pf01523, pf01522, pf01521, pf01520, pf01519, pf01518, pf01517, pf01516, pf01515, pf01514, pf01513, pf01512			0.0516042
	scaffold00016	2	26	8	0.00809919	0.137686	pf04710, pf04709, pf04708, pf04707, pf04706, pf04705, pf04704, pf04703			0.0450842
	scaffold00003	4	27	5	0.0287971	0.326367	pf01471, pf01470, pf01469, pf01468, pf01467			0.0206116
	scaffold00008	3	28	5	0.0287971	0.326367	pf02765, pf02764, pf02763, pf02762, pf02761			0.0161571
	scaffold00006	2		4	0.236576	1	pf02393, pf02392, pf02391, pf02390			0.0660784
	scaffold00007	2		4	0.236576	1	pf02635, pf02634, pf02633, pf02632			0.0161571
	scaffold00008	4		4	0.236576	1	pf02748, pf02747, pf02746, pf02745			0.0161571
	scaffold00021	5		4	0.236576	1	pf05660, pf05659, pf05658, pf05657			0.0660784
	scaffold00024	1		4	0.236576	1	pf06246, pf06245, pf06244, pf06243			0.0660784
	scaffold00001	4	3	3	0.965803	1	pf00217, pf00216, pf00215			1
	scaffold00001	8	11	3	0.965803	1	pf00013, pf00012, pf00011			1
	scaffold00002	1		3	0.965803	1	pf00888, pf00887, pf00886			0.0516042
	scaffold00002	4		3	0.965803	1	pf00754, pf00753, pf00752			1
	scaffold00009	2	28	3	0.965803	1	pf03085, pf03084, pf03083			1
	scaffold00010	1		3	0.965803	1	pf03495, pf03494, pf03493			0.0516042
	scaffold00010	2		3	0.965803	1	pf03318, pf03317, pf03316			1
	scaffold00014	1	22	3	0.965803	1	pf04465, pf04464, pf04463			0.0516042
	scaffold00017	1		3	0.965803	1	pf05035, pf05034, pf05033			0.0516042
	scaffold00017	2	3	3	0.965803	1	pf04936, pf04935, pf04934			1
	scaffold00018	1		3	0.965803	1	pf05268, pf05267, pf05266			0.0598595
	scaffold00019	1		3	0.965803	1	pf05429, pf05428, pf05427			0.0598595
	scaffold00019	3		3	0.965803	1	pf05342, pf05341, pf05340			1
	scaffold00021	1		3	0.965803	1	pf05783, pf05782, pf05781			0.0516042
	Number of clusters with FDR 10%:			3				Number of significant clusters with relatedness FDR 10%:		3
	Size of largest cluster:			26						1
	Average cluster size (FDR 10%):			18				Number of clusters with relatedness FDR 10%:		18
	Number of clustered genes (FDR 10%):			54						0.72
M. globosa	mgl_sf_8_1	1	13	8	0.00029997	0.00539946	MGL_3333, MGL_3332, MGL_3331, MGL_3330, MGL_3329, MGL_3328, MGL_3327, MGL_3326			0	Part of Cluster C2
	mgl_sf_1_1	2	13	4	0.0158984	0.0715428	MGL_0537, MGL_0536, MGL_0535, MGL_0534			0.0432224
	mgl_sf_1_2	2	14	4	0.0158984	0.0715428	MGL_0800, MGL_0799, MGL_0798, MGL_0797			0.00337675	Cluster C4
	mgl_sf_3_1	1	15	4	0.0158984	0.0715428	MGL_1576, MGL_1575, MGL_1574, MGL_1573			0.00801978	Part of Cluster C5
	mgl_sf_15_1	1		3	0.326367	0.83923	MGL_4198, MGL_4197, MGL_4196			1
	mgl_sf_17_1	1	13	3	0.326367	0.83923	MGL_4244, MGL_4243, MGL_4242			1
	mgl_sf_8_1	2	13	3	0.326367	0.83923	MGL_3077, MGL_3076, MGL_3075			0.00671946	Part of Cluster C3
	Number of clusters with FDR 10%:			4				Number of significant clusters with relatedness FDR 10%:		4
	Size of largest cluster:			8						1
	Average cluster size (FDR 10%):			5				Number of clusters with relatedness FDR 10%:		5
	Number of clustered genes (FDR 10%):			20						0.714286
M. pennsylvanicum	scaffold25	1	1	10	0.00029997	0.00719928	mp02626, mp02625, mp02629, mp02624, mp02630, mp02623, mp02622, mp02621, mp02631, mp02632			0.00821713
	scaffold91	1	31	5	0.00489951	0.0587941	mp05729, mp05728, mp05727, mp05726, mp05747			0.00183299
	scaffold1	1	30	3	0.680532	1	mp02114, mp06008, mp01975			1
	scaffold10	2	4	3	0.680532	1	mp00269, mp00270, mp00271	mp00223, mp00266, mp06166, mp00267, mp00268	8	0.00414269
	scaffold28	1	30	3	0.680532	1	mp06261, mp02836, mp02842			0.00716305	Fully Mp specific
	scaffold29	2		3	0.680532	1	mp02885, mp06108, mp02910			0.00735156
	scaffold71	1	6	0				mp05068, mp05069, mp05070	3	1
	scaffold29	1	7	0				mp02910, mp02911, mp02884, mp02883, mp06299	5	1
	scaffold34	1	8	0				mp03254, mp03255, mp03256	3	1
	scaffold37	1	10	0				mp03406, mp03432, mp03407, mp03431, mp03408, mp03430, mp03429, mp03428, mp03427, mp03409	10	0.0328685
	Number of clusters with FDR 10%:			2				Number of significant clusters with relatedness FDR 10%:		2
	Size of largest cluster:			10						1
	Average cluster size (FDR 10%):			7.5				Number of clusters with relatedness FDR 10%:		6
	Number of clustered genes (FDR 10%):			15						0.6
								Total number of clusters with relatedness FDR 10%:		93
										0.853211
