# Supplementary material for: A Tale of Genome Compartmentalization: The Evolution of Virulence Clusters in Smut Fungi
Source: Oxford University Press journal article supplement (doi:10.1093/gbe/evw026), 2016-02-12
Supplement: evw026_Supplementary_Data.zip [file evw026_Supplementary_Data.zip › TableS4.xlsx]

## Sheet: Sheet1
Cluster (Xu et al)	Name	Chr	Length	Signal peptide	D	Location	ProtComp integrated score	CSEP	Cluster (this study)
C1	MGL_4048	mgl_sf_13_1	898	no	0.219	Membrane bound Mitochondrial	2.8	no
	MGL_4049	mgl_sf_13_1	214	no	0.112	Membrane bound Golgi	9.4	no
	MGL_4050	mgl_sf_13_1	344	no	0.107	Cytoplasmic	6.3	no
	MGL_4051	mgl_sf_13_1	468	yes	0.703	Plasma membrane	4.5	yes
	MGL_4052	mgl_sf_13_1	475	yes	0.874	Membrane bound Lysosomal	8.4	no
	MGL_4053	mgl_sf_13_1	394	yes	0.663	Membrane bound Mitochondrial	3.1	yes
	MGL_4054	mgl_sf_13_1	453	yes	0.854	Membrane bound Lysosomal	8.2	no
	MGL_4055	mgl_sf_13_1	119	yes	0.837	Extracellular (Secreted)	9.7	yes
C2	MGL_3326	mgl_sf_8_1	639	yes	0.854	Extracellular (Secreted)	7.4	yes	mgl_sf_8_1-1
C2	MGL_3327	mgl_sf_8_1	381	yes	0.929	Plasma membrane	3.2	yes
C2	MGL_3328	mgl_sf_8_1	391	yes	0.727	Membrane bound Extracellular (Secreted)	5.6	yes
C2	MGL_3329	mgl_sf_8_1	383	yes	0.822	Membrane bound Mitochondrial	2.8	yes
C2	MGL_3330	mgl_sf_8_1	392	yes	0.828	Membrane bound Extracellular (Secreted)	4.2	yes
C2	MGL_3331	mgl_sf_8_1	390	yes	0.653	Cytoplasmic	5.1	yes
C2	MGL_3332	mgl_sf_8_1	881	no	0.104	Nuclear	5.6	no
C2	MGL_3333	mgl_sf_8_1	713	no	0.107	Extracellular (Secreted)	9.9	yes
C2	MGL_3334	mgl_sf_8_2	250	no	0.115	Cytoplasmic	6.9	no
C3	MGL_3072	mgl_sf_8_1	160	no	0.219	Plasma membrane	9.9	no
C3	MGL_3073	mgl_sf_8_1	304	no	0.102	Membrane bound Endoplasmic reticulum	8.8	no
C3	MGL_3074	mgl_sf_8_1	284	no	0.104	Plasma membrane	5.1	no
C3	MGL_3075	mgl_sf_8_1	652	yes	0.817	Extracellular (Secreted)	8.9	yes	mgl_sf_8_1-2
C3	MGL_3076	mgl_sf_8_1	655	yes	0.907	Extracellular (Secreted)	7.3	yes
C3	MGL_3077	mgl_sf_8_1	654	yes	0.759	Extracellular (Secreted)	8.2	yes
C3	MGL_3078	mgl_sf_8_1	696	no	0.317	Plasma membrane	5.8	no
C4	MGL_0797	mgl_sf_1_2	304	yes	0.822	Membrane bound Lysosomal	8.7	no	mgl_sf_1_2-2
C4	MGL_0798	mgl_sf_1_2	304	yes	0.854	Membrane bound Lysosomal	7.4	yes
C4	MGL_0799	mgl_sf_1_2	304	yes	0.787	Membrane bound Lysosomal	7.9	yes
C4	MGL_0800	mgl_sf_1_2	304	yes	0.891	Membrane bound Endoplasmic reticulum	6.4	yes
C5	MGL_1572	mgl_sf_3_1	444	no	0.165	Membrane bound Extracellular (Secreted)	2.7	no
C5	MGL_1573	mgl_sf_3_1	748	yes	0.773	Membrane bound Extracellular (Secreted)	5.2	yes	mgl_sf_3_1-1
C5	MGL_1574	mgl_sf_3_1	668	yes	0.854	Membrane bound Golgi	6.6	yes
C5	MGL_1575	mgl_sf_3_1	742	yes	0.717	Membrane bound Golgi	7.5	yes
C5	MGL_1576	mgl_sf_3_1	113	no	0.126	Extracellular (Secreted)	9.1	yes
C5	MGL_1577	mgl_sf_3_1	452	no	0.469	Membrane bound Mitochondrial	3.3	no
C6	MGL_3562	mgl_sf_10_1	59	yes	0.694	Mitochondrial	5.8	yes
C6	MGL_3563	mgl_sf_10_1	353	no	0.121	Cytoplasmic	6.6	no
C6	MGL_3564	mgl_sf_10_1	62	yes	0.732	Extracellular (Secreted)	7.3	yes
C6	MGL_3565	mgl_sf_10_1	345	yes	0.796	Membrane bound Mitochondrial	6.4	yes
C6	MGL_3566	mgl_sf_10_1	39	no	0.165	Membrane bound Extracellular (Secreted)	7.3	no
C6	MGL_3567	mgl_sf_10_1	464	yes	0.83	Extracellular (Secreted)	3.4	yes
C6	MGL_3568	mgl_sf_10_1	742	yes	0.725	Plasma membrane	5.1	yes
