# Supplementary material for: A Tale of Genome Compartmentalization: The Evolution of Virulence Clusters in Smut Fungi
Source: Oxford University Press journal article supplement (doi:10.1093/gbe/evw026), 2016-02-12
Supplement: evw026_Supplementary_Data.zip [file evw026_Supplementary_Data.zip › TableS5.xlsx]

## Sheet: Sheet1
Location	Number of genes (percent of total)
Membrane bound Extracellular (Secreted)	256 (39.1%)
Plasma membrane	133 (20.3%)
Membrane bound Mitochondrial	52 (7.9%)
Membrane bound Endoplasmic reticulum	48 (7.3%)
Mitochondrial	37 (5.6%)
Membrane bound Lysosomal	29 (4.4%)
Endoplasmic reticulum	24 (2.7%)
Membrane bound Golgi	20 (3.1%)
Membrane bound Vacuolar	15 (2.3%)
Golgi	14 (2.1%)
Cytoplasmic	12 (1.8%)
Nuclear	6 (0.9%)
Peroxisomal	4 (0.6%)
Lysosomal	3 (0.5%)
Membrane bound Peroxisomal	1 (0.2%)
Vacuolar	1 (0.2%)
Total membrane bound	554 (84.6%)
