# Supplementary figures and images for: A Tale of Genome Compartmentalization: The Evolution of Virulence Clusters in Smut Fungi
Source: Oxford University Press journal article supplement (doi:10.1093/gbe/evw026), 2016-02-12

Distance to closest repeat (kb)

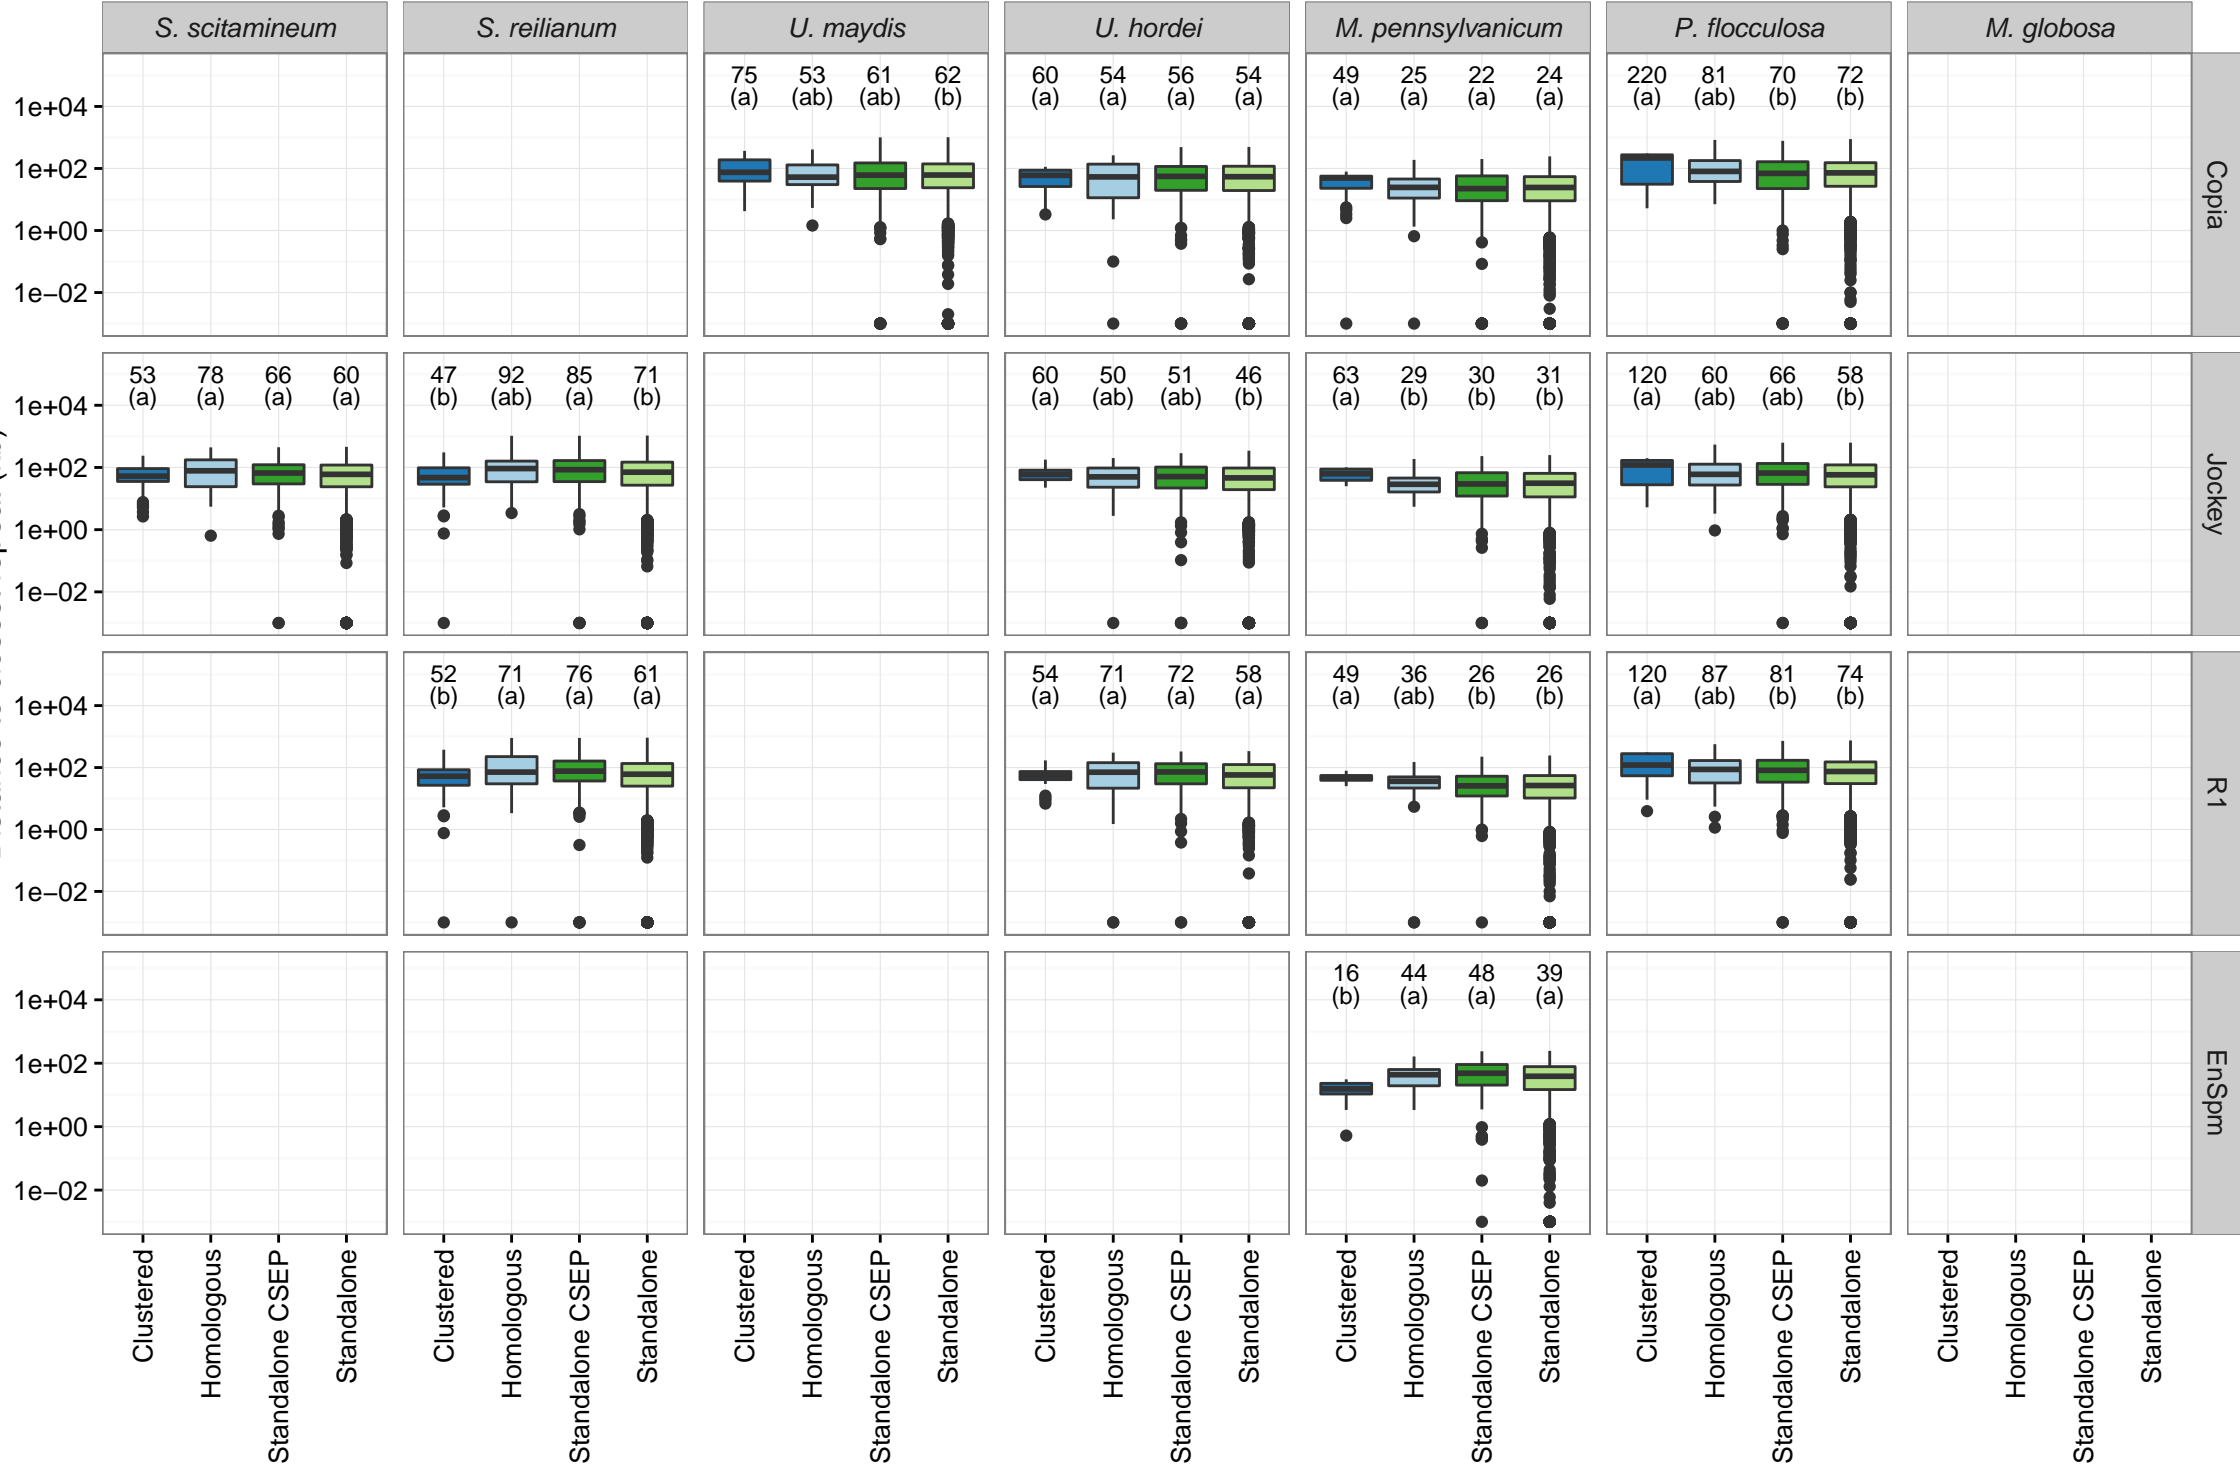

Supplement: evw026_Supplementary_Data.zip [file evw026_Supplementary_Data.zip › FigureS7.pdf]

Dinucleotide frequencies in repeats

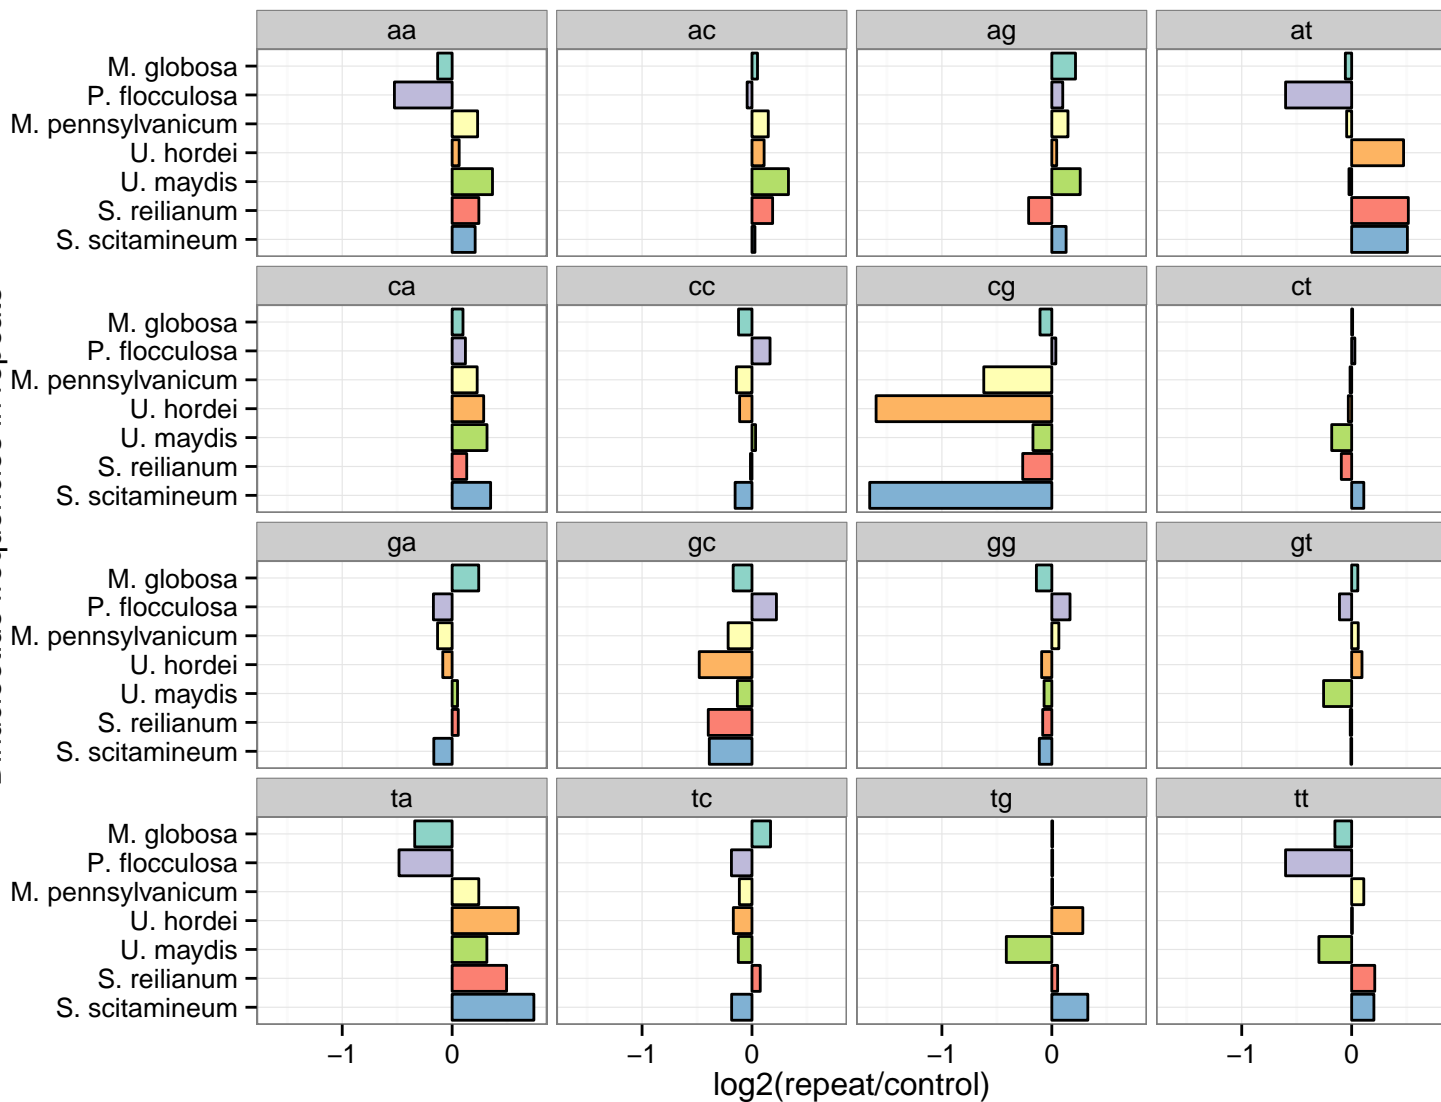

Supplement: evw026_Supplementary_Data.zip [file evw026_Supplementary_Data.zip › FigureS1.pdf]

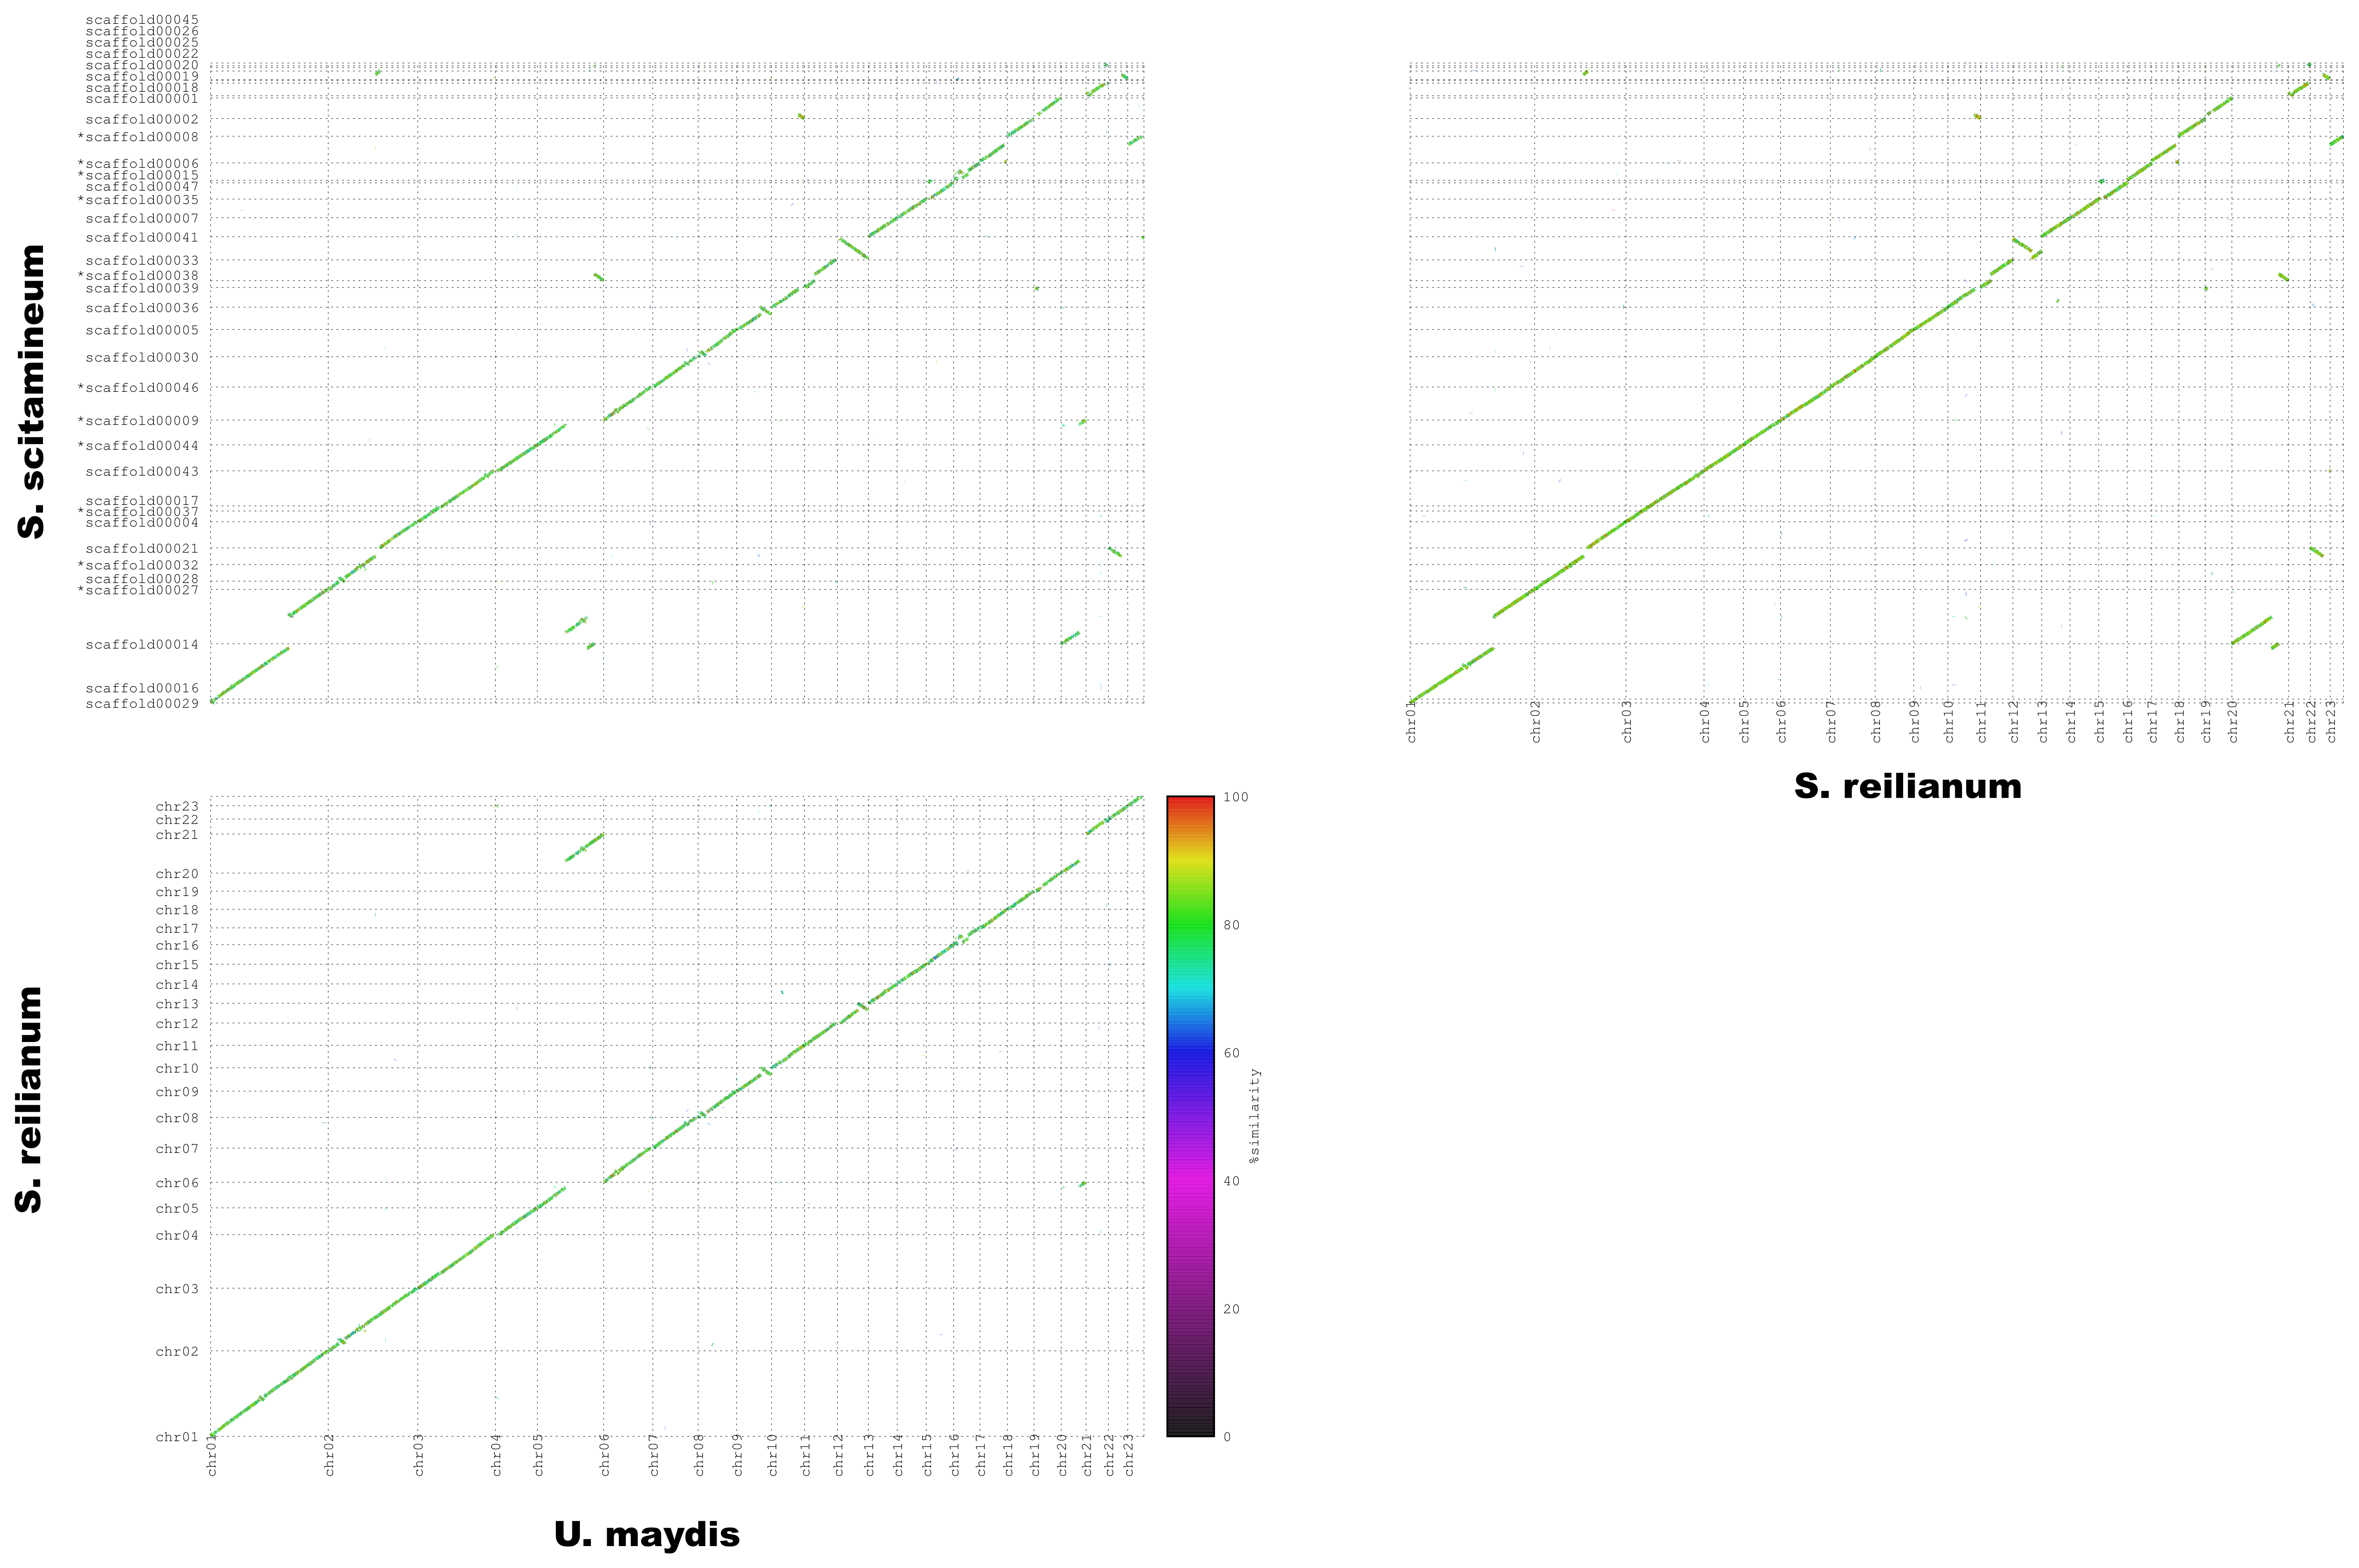

Supplement: evw026_Supplementary_Data.zip [file evw026_Supplementary_Data.zip › FigureS2.tif]

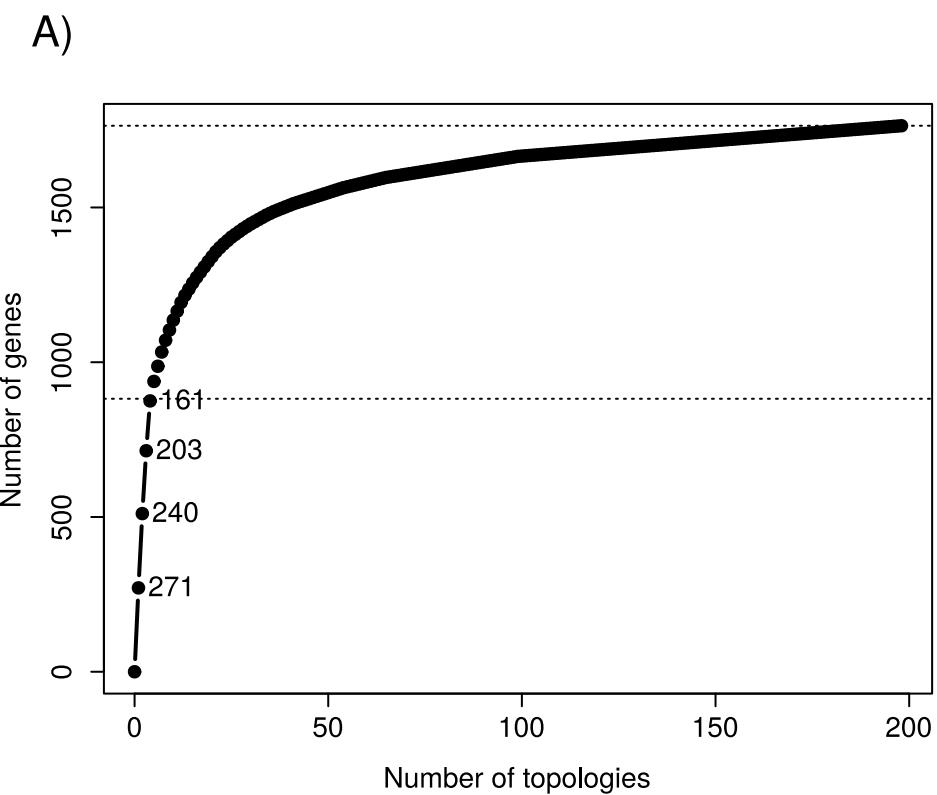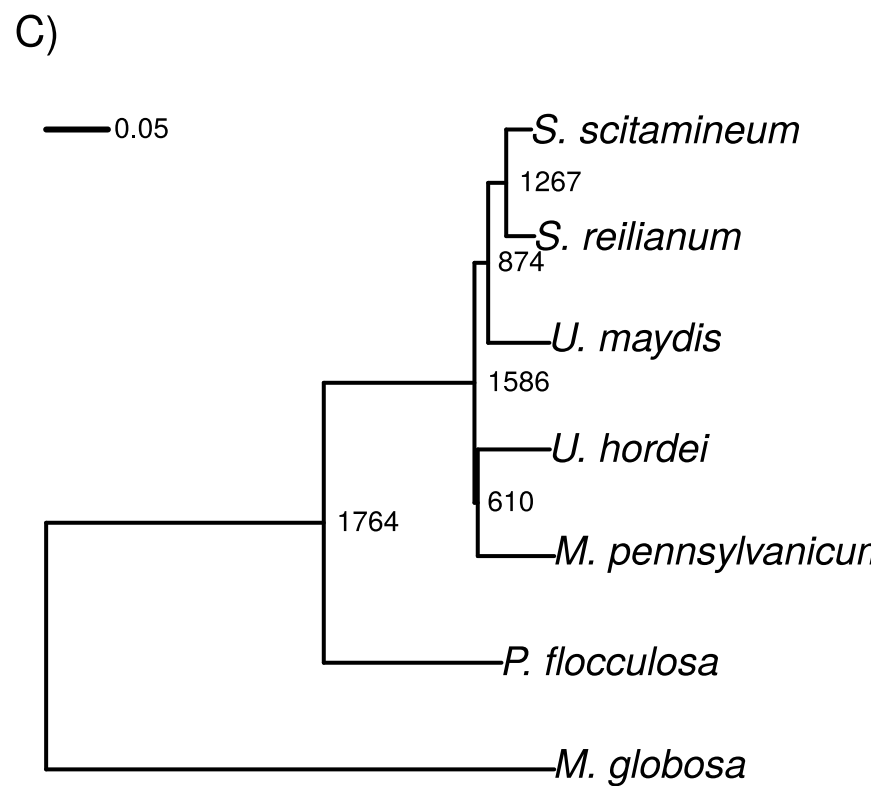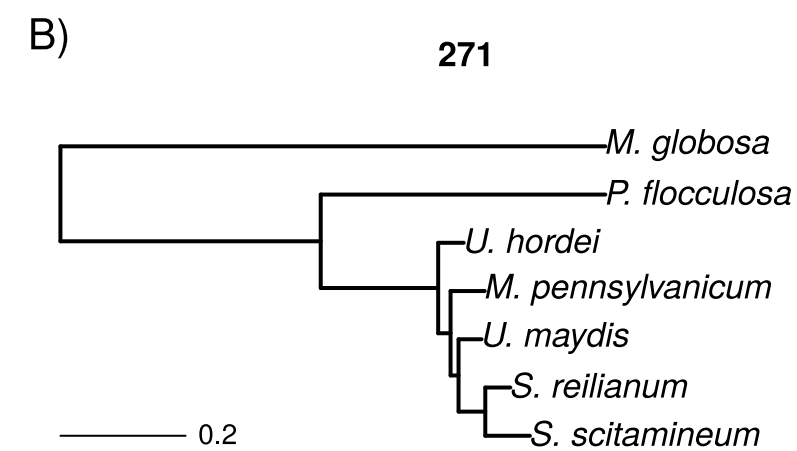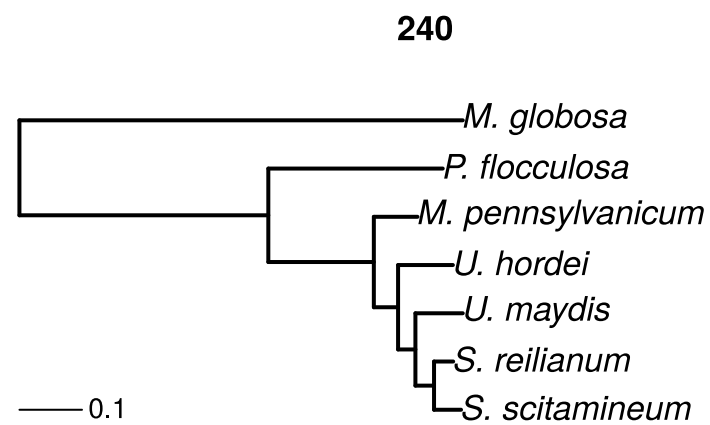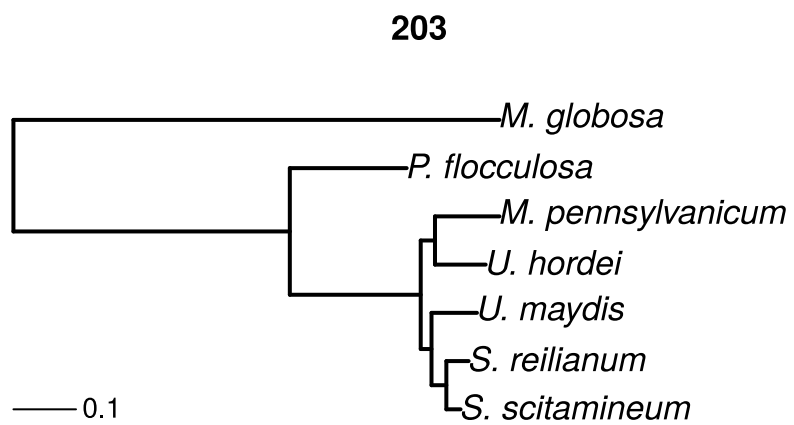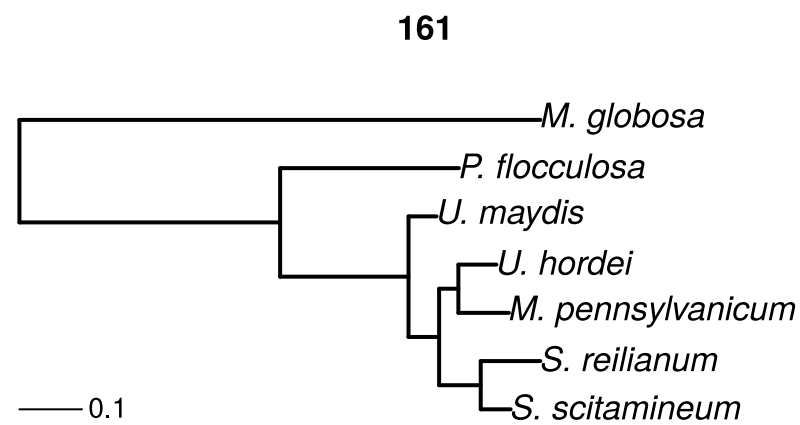

Supplement: evw026_Supplementary_Data.zip [file evw026_Supplementary_Data.zip › FigureS3.pdf]

Distance to closest repeat (kb)

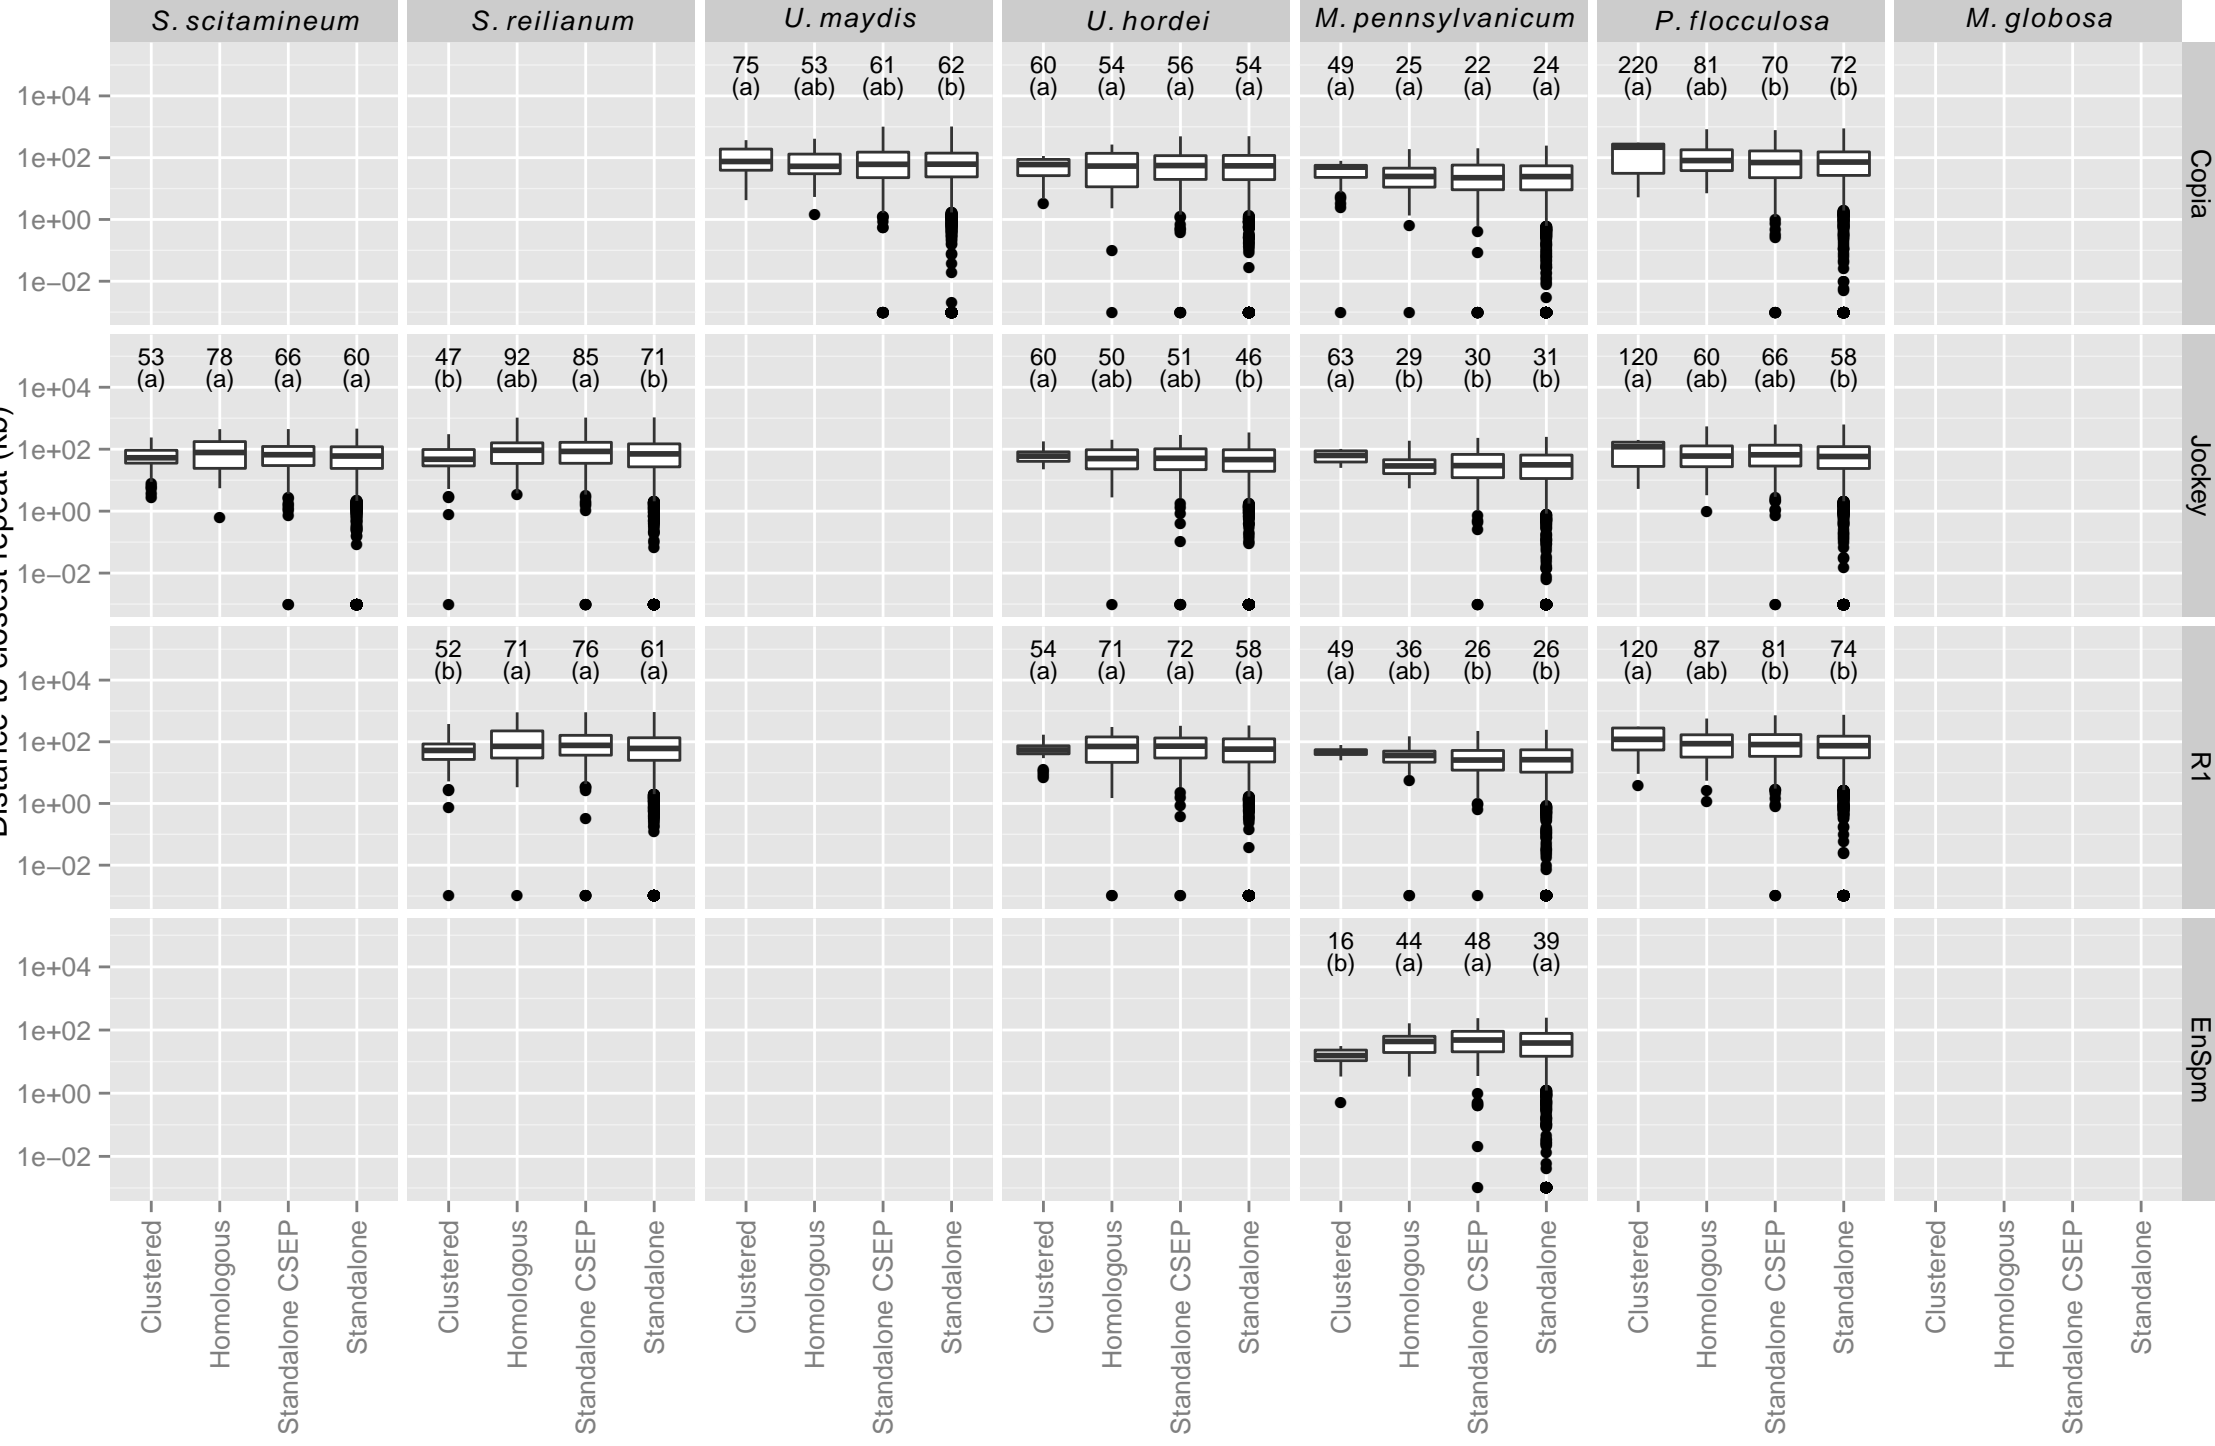

Supplement: evw026_Supplementary_Data.zip [file evw026_Supplementary_Data.zip › FigureS6.pdf]

Proportion of CSEPs

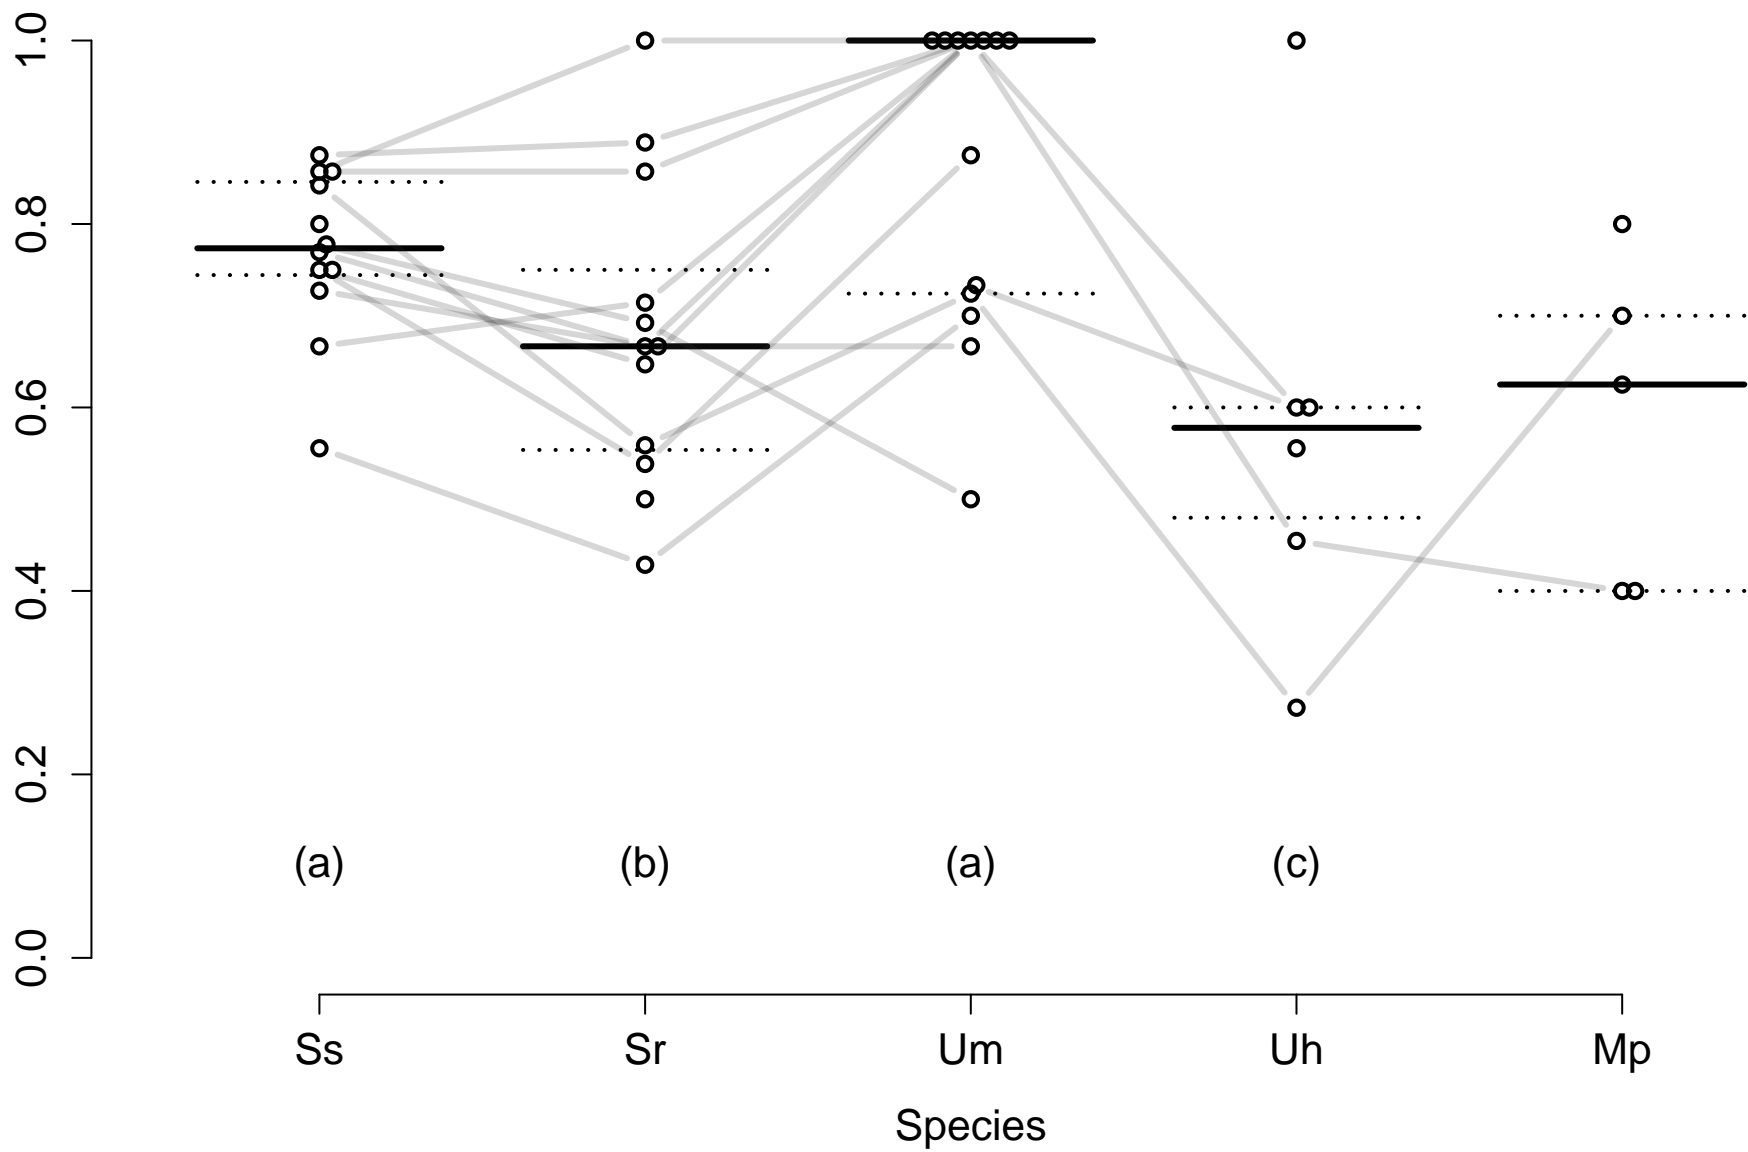

Supplement: evw026_Supplementary_Data.zip [file evw026_Supplementary_Data.zip › FigureS5.pdf]
