# Supplementary figures and images for: A Tale of Genome Compartmentalization: The Evolution of Virulence Clusters in Smut Fungi
Source: PubMed Central journal article supplement — Genome Biol Evol. 2016 Feb 12;8(3):681–704. doi: 10.1093/gbe/evw026 (PMC4824034; doi:10.1093/gbe/evw026), 2016-02-12

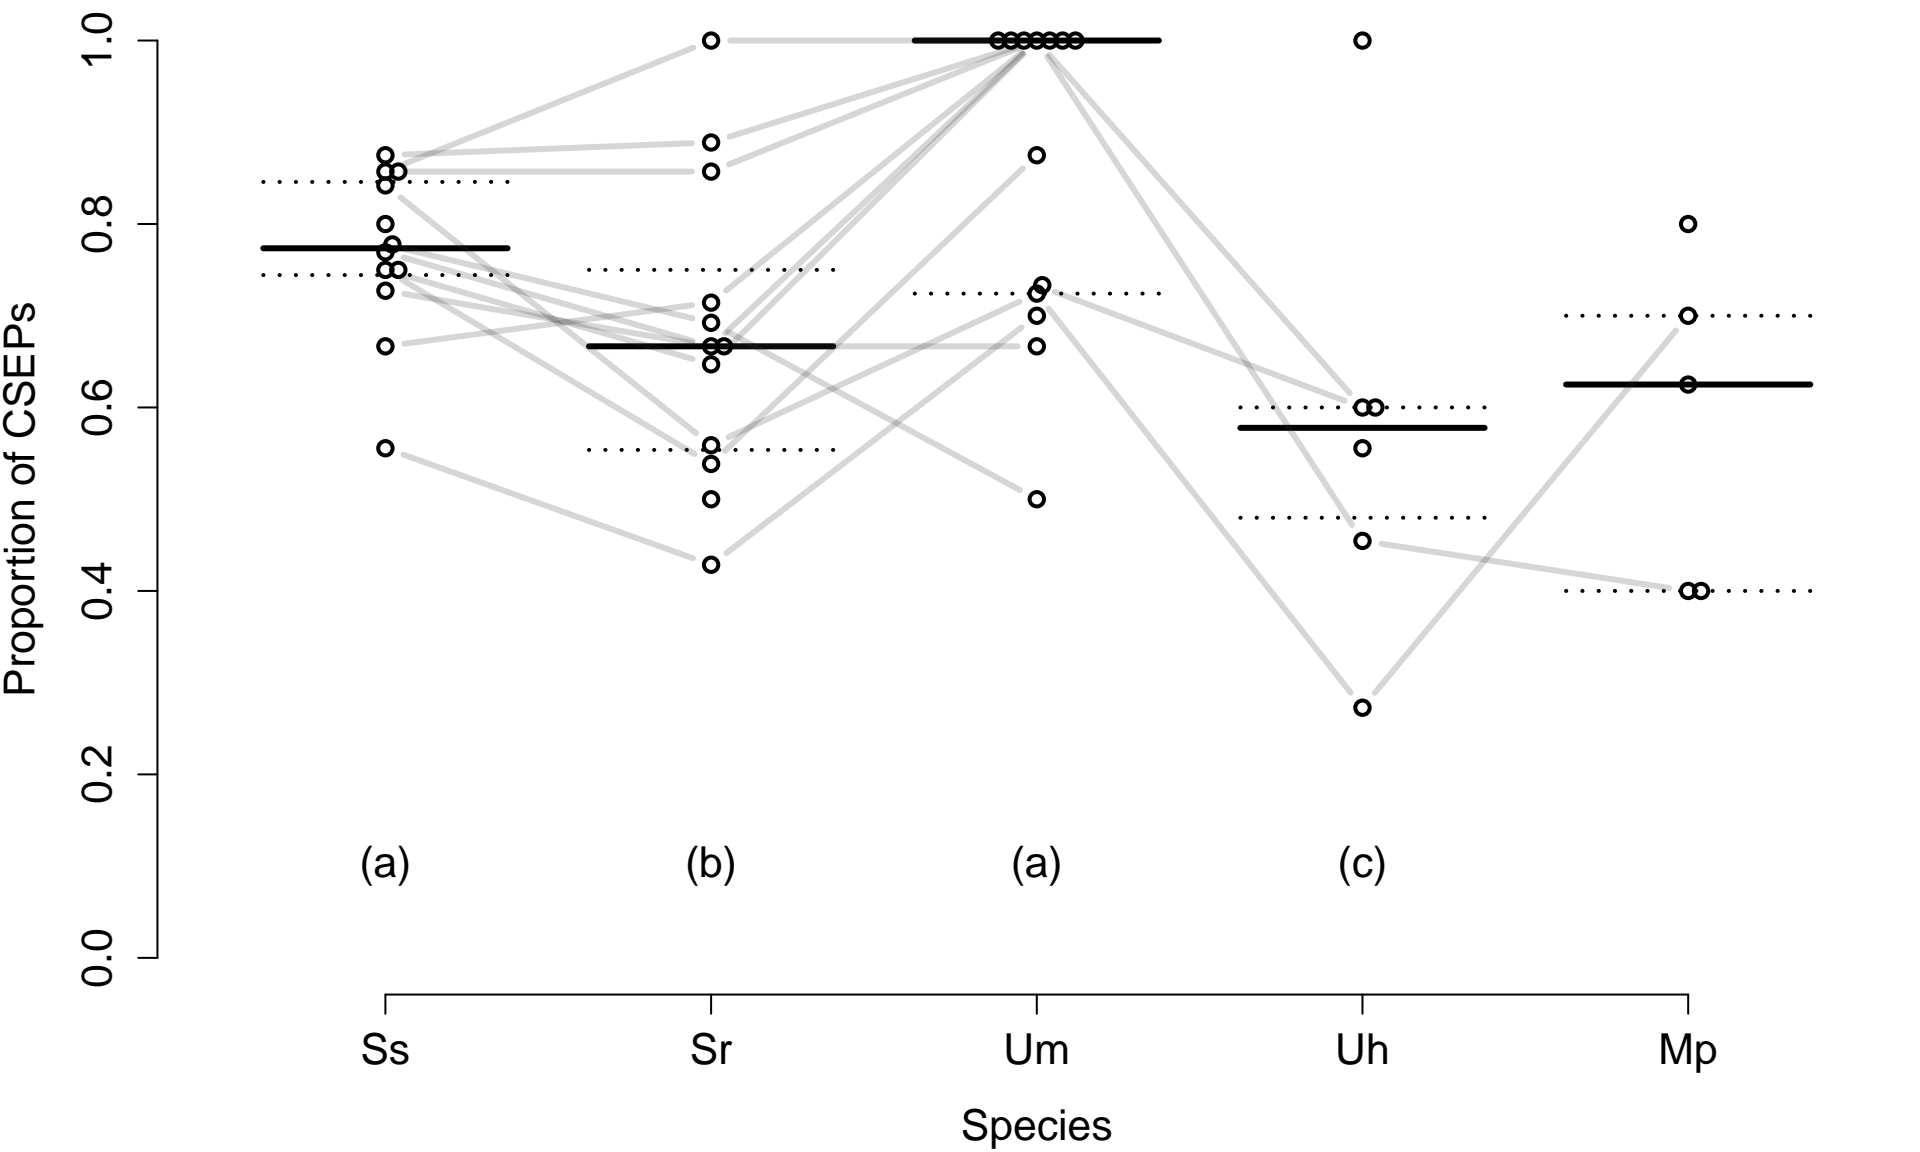

Supplement: supp_evw026_FigureS5.pdf [file supp_evw026_FigureS5.pdf]
